# Supplementary material for: N-myc downstream regulated gene 1 (ndrg1) functions as a molecular switch for cellular adaptation to hypoxia
Source: eLife journal article supplement (doi:10.7554/elife.74031), 2022-09-16
Supplement: fig1-figsupp3-data1 [file Figure 1-figure supplement 3-Source Data 1.xlsx]

## Sheet: Source Data
WT	ndrg1a -/-
31.513	42.8607
34.2649	30.1944
42.5121	27.6548
32.7883	35.8639
32.3296	39.2562
61.5927	36.0704
41.9963	36.0799
50.9856	45.7639
38.5904	65.4306
47.9007	44.7476

## Sheet: Unpaired t test
Table Analyzed	Data 1
Column B	ndrg1a -/-
vs.	vs.
Column A	WT
Unpaired t test
P value	0.8192
P value summary	ns
Significantly different (P < 0.05)?	No
One- or two-tailed P value?	Two-tailed
t, df	t=0.2319, df=18
How big is the difference?
Mean of column A	41.45
Mean of column B	40.39
Difference between means (B - A) ± SEM	-1.055 ± 4.549
95% confidence interval	-10.61 to 8.502
R squared (eta squared)	0.00298
F test to compare variances
F, DFn, Dfd	1.175, 9, 9
P value	0.8143
P value summary	ns
Significantly different (P < 0.05)?	No
Data analyzed
Sample size, column A	10
Sample size, column B	10
