# Supplementary material for: N-myc downstream regulated gene 1 (ndrg1) functions as a molecular switch for cellular adaptation to hypoxia
Source: eLife journal article supplement (doi:10.7554/elife.74031), 2022-09-16
Supplement: fig2-data1 [file Figure 2-Source Data 1.xlsx]

## Sheet: Source Data
Hours in anoxia	WT
0	100	100	100	100	100	100	100	100	100	100	100	100	100	100	100	100	100	100	100	100	100	100	100	100	100	100	100	100	100	100	100	100	100	100	100	100	100	100	100	100	100	100	100	100	100	100	100	100	100
6	100	100	100	100	100	100	100	100	100	100	100	100	100	100	100	100	100	100	100	100	100	100	100	100	100	100	100	100	100	100	100	100	100	100	100	100	100	100	100	100	100	100	100	100	100	100	100	100	100
12	100	100	100	100	100	100	100	100	100	100	100	100	100	100	100	100	100	100	100	100	100	100	100	100	100	100	100	100	100	100	100	100	100	100	100	100	100	100	100	100	100	100	100	100	100	100	100	100	100
18	100	100	100	100	100	100	100	100	100	100	100	100	100	100	100	100	100	100	100	100	100	100	100	100	100	100	100	100	100	100	100	100	100	100	100	100	100	100	100	100	100	100	100	100	100	100	100	100	100
24	100	100	100	100	100	100	100	100	100	100	100	100	100	100	100	100	100	100	100	100	100	100	100	100	100	100	100	100	100	100	100	100	100	100	100	100	100	100	100	100	100	100	100	100	100	100	100	100	100
[truncated: 471 more columns]

## Sheet: ANOVA results
Table Analyzed	24hpf immediate
Two-way ANOVA	Ordinary
Alpha	0.05
Source of Variation	% of total variation	P value	P value summary	Significant?
Interaction	1.364	<0.0001	****	Yes
Row Factor	26.88	<0.0001	****	Yes
Column Factor	2.11	<0.0001	****	Yes
ANOVA table	SS (Type III)	DF	MS	F (DFn, DFd)	P value
Interaction	47844	4	11961	F (4, 1708) = 9.025	P<0.0001
Row Factor	942699	4	235675	F (4, 1708) = 177.8	P<0.0001
Column Factor	74009	1	74009	F (1, 1708) = 55.84	P<0.0001
Residual	2263755	1708	1325
Difference between column means
Predicted (LS) mean of WT	84.35
Predicted (LS) mean of ndrg1a -/-	70.52
Difference between predicted means	13.84
SE of difference	1.851
95% CI of difference	10.20 to 17.47
Data summary
Number of columns (Column Factor)	2
Number of rows (Row Factor)	5
Number of values	1718

## Sheet: Multiple comparisons
Compare cell means regardless of rows and columns
Number of families	1
Number of comparisons per family	45
Alpha	0.05
Tukey's multiple comparisons test	Predicted (LS) mean diff.	95.00% CI of diff.	Below threshold?	Summary	Adjusted P Value
Row 1:WT vs. Row 1:ndrg1a -/-	0	-14.04 to 14.04	No	ns	>0.9999
Row 1:WT vs. Row 2:WT	0	-15.01 to 15.01	No	ns	>0.9999
Row 1:WT vs. Row 2:ndrg1a -/-	14.78	0.1475 to 29.42	Yes	*	0.0454
Row 1:WT vs. Row 3:WT	4.667	-9.015 to 18.35	No	ns	0.9866
Row 1:WT vs. Row 3:ndrg1a -/-	8.571	-4.640 to 21.78	No	ns	0.5596
Row 1:WT vs. Row 4:WT	21.46	8.680 to 34.25	Yes	****	<0.0001
Row 1:WT vs. Row 4:ndrg1a -/-	47.3	35.44 to 59.17	Yes	****	<0.0001
Row 1:WT vs. Row 5:WT	52.11	38.25 to 65.98	Yes	****	<0.0001
Row 1:WT vs. Row 5:ndrg1a -/-	76.76	64.37 to 89.16	Yes	****	<0.0001
Row 1:ndrg1a -/- vs. Row 2:WT	0	-15.01 to 15.01	No	ns	>0.9999
Row 1:ndrg1a -/- vs. Row 2:ndrg1a -/-	14.78	0.1475 to 29.42	Yes	*	0.0454
Row 1:ndrg1a -/- vs. Row 3:WT	4.667	-9.015 to 18.35	No	ns	0.9866
Row 1:ndrg1a -/- vs. Row 3:ndrg1a -/-	8.571	-4.640 to 21.78	No	ns	0.5596
Row 1:ndrg1a -/- vs. Row 4:WT	21.46	8.680 to 34.25	Yes	****	<0.0001
Row 1:ndrg1a -/- vs. Row 4:ndrg1a -/-	47.3	35.44 to 59.17	Yes	****	<0.0001
Row 1:ndrg1a -/- vs. Row 5:WT	52.11	38.25 to 65.98	Yes	****	<0.0001
Row 1:ndrg1a -/- vs. Row 5:ndrg1a -/-	76.76	64.37 to 89.16	Yes	****	<0.0001
Row 2:WT vs. Row 2:ndrg1a -/-	14.78	-0.7846 to 30.35	No	ns	0.0793
Row 2:WT vs. Row 3:WT	4.667	-10.01 to 19.34	No	ns	0.9919
Row 2:WT vs. Row 3:ndrg1a -/-	8.571	-5.665 to 22.81	No	ns	0.6641
Row 2:WT vs. Row 4:WT	21.46	7.623 to 35.30	Yes	****	<0.0001
Row 2:WT vs. Row 4:ndrg1a -/-	47.3	34.31 to 60.30	Yes	****	<0.0001
Row 2:WT vs. Row 5:WT	52.11	37.27 to 66.96	Yes	****	<0.0001
Row 2:WT vs. Row 5:ndrg1a -/-	76.76	63.28 to 90.25	Yes	****	<0.0001
Row 2:ndrg1a -/- vs. Row 3:WT	-10.12	-24.41 to 4.179	No	ns	0.4283
Row 2:ndrg1a -/- vs. Row 3:ndrg1a -/-	-6.211	-20.06 to 7.633	No	ns	0.9208
Row 2:ndrg1a -/- vs. Row 4:WT	6.681	-6.756 to 20.12	No	ns	0.8602
Row 2:ndrg1a -/- vs. Row 4:ndrg1a -/-	32.52	19.95 to 45.08	Yes	****	<0.0001
Row 2:ndrg1a -/- vs. Row 5:WT	37.33	22.86 to 51.80	Yes	****	<0.0001
Row 2:ndrg1a -/- vs. Row 5:ndrg1a -/-	61.98	48.91 to 75.05	Yes	****	<0.0001
Row 3:WT vs. Row 3:ndrg1a -/-	3.905	-8.928 to 16.74	No	ns	0.9941
Row 3:WT vs. Row 4:WT	16.8	4.405 to 29.19	Yes	***	0.0008
Row 3:WT vs. Row 4:ndrg1a -/-	42.63	31.19 to 54.08	Yes	****	<0.0001
Row 3:WT vs. Row 5:WT	47.45	33.94 to 60.95	Yes	****	<0.0001
Row 3:WT vs. Row 5:ndrg1a -/-	72.1	60.10 to 84.09	Yes	****	<0.0001
Row 3:ndrg1a -/- vs. Row 4:WT	12.89	1.022 to 24.76	Yes	*	0.021
Row 3:ndrg1a -/- vs. Row 4:ndrg1a -/-	38.73	27.86 to 49.60	Yes	****	<0.0001
Row 3:ndrg1a -/- vs. Row 5:WT	43.54	30.52 to 56.57	Yes	****	<0.0001
Row 3:ndrg1a -/- vs. Row 5:ndrg1a -/-	68.19	56.74 to 79.65	Yes	****	<0.0001
Row 4:WT vs. Row 4:ndrg1a -/-	25.84	15.49 to 36.19	Yes	****	<0.0001
Row 4:WT vs. Row 5:WT	30.65	18.06 to 43.24	Yes	****	<0.0001
Row 4:WT vs. Row 5:ndrg1a -/-	55.3	44.34 to 66.26	Yes	****	<0.0001
Row 4:ndrg1a -/- vs. Row 5:WT	4.811	-6.846 to 16.47	No	ns	0.9521
Row 4:ndrg1a -/- vs. Row 5:ndrg1a -/-	29.46	19.59 to 39.33	Yes	****	<0.0001
Row 5:WT vs. Row 5:ndrg1a -/-	24.65	12.45 to 36.85	Yes	****	<0.0001
Test details	Predicted (LS) mean 1	Predicted (LS) mean 2	Predicted (LS) mean diff.	SE of diff.	N1	N2	q	DF
Row 1:WT vs. Row 1:ndrg1a -/-	100	100	0	4.431	135	135	0	1708
Row 1:WT vs. Row 2:WT	100	100	0	4.737	135	105	0	1708
Row 1:WT vs. Row 2:ndrg1a -/-	100	85.22	14.78	4.62	135	115	4.525	1708
Row 1:WT vs. Row 3:WT	100	95.33	4.667	4.319	135	150	1.528	1708
Row 1:WT vs. Row 3:ndrg1a -/-	100	91.43	8.571	4.17	135	175	2.907	1708
Row 1:WT vs. Row 4:WT	100	78.54	21.46	4.035	135	205	7.522	1708
Row 1:WT vs. Row 4:ndrg1a -/-	100	52.7	47.3	3.745	135	315	17.86	1708
Row 1:WT vs. Row 5:WT	100	47.89	52.11	4.376	135	142	16.84	1708
Row 1:WT vs. Row 5:ndrg1a -/-	100	23.24	76.76	3.914	135	241	27.74	1708
Row 1:ndrg1a -/- vs. Row 2:WT	100	100	0	4.737	135	105	0	1708
Row 1:ndrg1a -/- vs. Row 2:ndrg1a -/-	100	85.22	14.78	4.62	135	115	4.525	1708
Row 1:ndrg1a -/- vs. Row 3:WT	100	95.33	4.667	4.319	135	150	1.528	1708
Row 1:ndrg1a -/- vs. Row 3:ndrg1a -/-	100	91.43	8.571	4.17	135	175	2.907	1708
Row 1:ndrg1a -/- vs. Row 4:WT	100	78.54	21.46	4.035	135	205	7.522	1708
Row 1:ndrg1a -/- vs. Row 4:ndrg1a -/-	100	52.7	47.3	3.745	135	315	17.86	1708
Row 1:ndrg1a -/- vs. Row 5:WT	100	47.89	52.11	4.376	135	142	16.84	1708
Row 1:ndrg1a -/- vs. Row 5:ndrg1a -/-	100	23.24	76.76	3.914	135	241	27.74	1708
Row 2:WT vs. Row 2:ndrg1a -/-	100	85.22	14.78	4.914	105	115	4.254	1708
Row 2:WT vs. Row 3:WT	100	95.33	4.667	4.632	105	150	1.425	1708
Row 2:WT vs. Row 3:ndrg1a -/-	100	91.43	8.571	4.494	105	175	2.697	1708
Row 2:WT vs. Row 4:WT	100	78.54	21.46	4.369	105	205	6.948	1708
Row 2:WT vs. Row 4:ndrg1a -/-	100	52.7	47.3	4.102	105	315	16.31	1708
Row 2:WT vs. Row 5:WT	100	47.89	52.11	4.686	105	142	15.73	1708
Row 2:WT vs. Row 5:ndrg1a -/-	100	23.24	76.76	4.257	105	241	25.5	1708
Row 2:ndrg1a -/- vs. Row 3:WT	85.22	95.33	-10.12	4.512	115	150	3.17	1708
Row 2:ndrg1a -/- vs. Row 3:ndrg1a -/-	85.22	91.43	-6.211	4.37	115	175	2.01	1708
Row 2:ndrg1a -/- vs. Row 4:WT	85.22	78.54	6.681	4.242	115	205	2.228	1708
Row 2:ndrg1a -/- vs. Row 4:ndrg1a -/-	85.22	52.7	32.52	3.966	115	315	11.59	1708
Row 2:ndrg1a -/- vs. Row 5:WT	85.22	47.89	37.33	4.567	115	142	11.56	1708
Row 2:ndrg1a -/- vs. Row 5:ndrg1a -/-	85.22	23.24	61.98	4.126	115	241	21.24	1708
Row 3:WT vs. Row 3:ndrg1a -/-	95.33	91.43	3.905	4.051	150	175	1.363	1708
Row 3:WT vs. Row 4:WT	95.33	78.54	16.8	3.912	150	205	6.073	1708
Row 3:WT vs. Row 4:ndrg1a -/-	95.33	52.7	42.63	3.612	150	315	16.69	1708
Row 3:WT vs. Row 5:WT	95.33	47.89	47.45	4.263	150	142	15.74	1708
Row 3:WT vs. Row 5:ndrg1a -/-	95.33	23.24	72.1	3.786	150	241	26.93	1708
Row 3:ndrg1a -/- vs. Row 4:WT	91.43	78.54	12.89	3.747	175	205	4.866	1708
Row 3:ndrg1a -/- vs. Row 4:ndrg1a -/-	91.43	52.7	38.73	3.432	175	315	15.96	1708
Row 3:ndrg1a -/- vs. Row 5:WT	91.43	47.89	43.54	4.112	175	142	14.98	1708
Row 3:ndrg1a -/- vs. Row 5:ndrg1a -/-	91.43	23.24	68.19	3.616	175	241	26.67	1708
Row 4:WT vs. Row 4:ndrg1a -/-	78.54	52.7	25.84	3.267	205	315	11.19	1708
Row 4:WT vs. Row 5:WT	78.54	47.89	30.65	3.975	205	142	10.9	1708
Row 4:WT vs. Row 5:ndrg1a -/-	78.54	23.24	55.3	3.459	205	241	22.61	1708
Row 4:ndrg1a -/- vs. Row 5:WT	52.7	47.89	4.811	3.68	315	142	1.849	1708
Row 4:ndrg1a -/- vs. Row 5:ndrg1a -/-	52.7	23.24	29.46	3.116	315	241	13.37	1708
Row 5:WT vs. Row 5:ndrg1a -/-	47.89	23.24	24.65	3.851	142	241	9.052	1708
