# Supplementary material for: N-myc downstream regulated gene 1 (ndrg1) functions as a molecular switch for cellular adaptation to hypoxia
Source: eLife journal article supplement (doi:10.7554/elife.74031), 2022-09-16
Supplement: fig2-data2 [file Figure 2-Source Data 2.xlsx]

## Sheet: Source Data
Hours in anoxia	wt
0	100	100	100	100	100	100	100	100	100	100	100	100	100	100	100	100	100	100	100	100	100	100	100	100	100	100	100	100	100	100
6	100	100	100	100	100	100	100	100	100	100	100	100	100	100	100	100	100	100	100	100	100	100	100	100	100	100	100	100	100	100	100	100	100	100	100	100	100	100	0	0
12	100	100	100	100	100	100	100	100	100	100	100	100	100	100	100	100	100	100	100	100	100	100	100	100	100	100	100	100	100	100	100	100	100	100	100	100	100	100	100	100	100	100	100	100	100	100	100	100	100
18	100	100	100	100	100	100	100	100	100	100	100	100	100	100	100	100	100	100	100	100	100	100	100	100	100	100	100	100	100	100	100	100	100	100	100	100	100	100	100	100	100	100	100	100	100	100	100	100	100
24	100	100	100	100	100	100	100	100	100	100	0	0	0	0	0	0	0
[truncated: 239 more columns]

## Sheet: ANOVA results
Table Analyzed	24hpf after +2d reoxy
Two-way ANOVA	Ordinary
Alpha	0.05
Source of Variation	% of total variation	P value	P value summary	Significant?
Interaction	5.71	<0.0001	****	Yes
Row Factor	23.55	<0.0001	****	Yes
Column Factor	3.008	<0.0001	****	Yes
ANOVA table	SS (Type III)	DF	MS	F (DFn, DFd)	P value
Interaction	75818	4	18955	F (4, 651) = 16.30	P<0.0001
Row Factor	312686	4	78171	F (4, 651) = 67.21	P<0.0001
Column Factor	39939	1	39939	F (1, 651) = 34.34	P<0.0001
Residual	757163	651	1163
Difference between column means
Predicted (LS) mean of wt	86.07
Predicted (LS) mean of ndrg1a -/-	66.33
Difference between predicted means	19.74
SE of difference	3.369
95% CI of difference	13.13 to 26.36
Data summary
Number of columns (Column Factor)	2
Number of rows (Row Factor)	5
Number of values	661

## Sheet: Multiple comparisons
Compare cell means regardless of rows and columns
Number of families	1
Number of comparisons per family	45
Alpha	0.05
Tukey's multiple comparisons test	Predicted (LS) mean diff.	95.00% CI of diff.	Below threshold?	Summary	Adjusted P Value
Row 1:wt vs. Row 1:ndrg1a -/-	0	-27.96 to 27.96	No	ns	>0.9999
Row 1:wt vs. Row 2:wt	5	-21.15 to 31.15	No	ns	0.9998
Row 1:wt vs. Row 2:ndrg1a -/-	8	-17.00 to 33.00	No	ns	0.9913
Row 1:wt vs. Row 3:wt	2.532	-20.69 to 25.75	No	ns	>0.9999
Row 1:wt vs. Row 3:ndrg1a -/-	3.03	-19.53 to 25.60	No	ns	>0.9999
Row 1:wt vs. Row 4:wt	20.95	-1.462 to 43.37	No	ns	0.0899
Row 1:wt vs. Row 4:ndrg1a -/-	64.48	43.15 to 85.81	Yes	****	<0.0001
Row 1:wt vs. Row 5:wt	41.18	8.308 to 74.04	Yes	**	0.0031
Row 1:wt vs. Row 5:ndrg1a -/-	92.86	64.41 to 121.3	Yes	****	<0.0001
Row 1:ndrg1a -/- vs. Row 2:wt	5	-21.15 to 31.15	No	ns	0.9998
Row 1:ndrg1a -/- vs. Row 2:ndrg1a -/-	8	-17.00 to 33.00	No	ns	0.9913
Row 1:ndrg1a -/- vs. Row 3:wt	2.532	-20.69 to 25.75	No	ns	>0.9999
Row 1:ndrg1a -/- vs. Row 3:ndrg1a -/-	3.03	-19.53 to 25.60	No	ns	>0.9999
Row 1:ndrg1a -/- vs. Row 4:wt	20.95	-1.462 to 43.37	No	ns	0.0899
Row 1:ndrg1a -/- vs. Row 4:ndrg1a -/-	64.48	43.15 to 85.81	Yes	****	<0.0001
Row 1:ndrg1a -/- vs. Row 5:wt	41.18	8.308 to 74.04	Yes	**	0.0031
Row 1:ndrg1a -/- vs. Row 5:ndrg1a -/-	92.86	64.41 to 121.3	Yes	****	<0.0001
Row 2:wt vs. Row 2:ndrg1a -/-	3	-19.97 to 25.97	No	ns	>0.9999
Row 2:wt vs. Row 3:wt	-2.468	-23.48 to 18.54	No	ns	>0.9999
Row 2:wt vs. Row 3:ndrg1a -/-	-1.97	-22.25 to 18.32	No	ns	>0.9999
Row 2:wt vs. Row 4:wt	15.95	-4.165 to 36.07	No	ns	0.261
Row 2:wt vs. Row 4:ndrg1a -/-	59.48	40.58 to 78.38	Yes	****	<0.0001
Row 2:wt vs. Row 5:wt	36.18	4.829 to 67.52	Yes	*	0.01
Row 2:wt vs. Row 5:ndrg1a -/-	87.86	61.18 to 114.5	Yes	****	<0.0001
Row 2:ndrg1a -/- vs. Row 3:wt	-5.468	-25.03 to 14.10	No	ns	0.9968
Row 2:ndrg1a -/- vs. Row 3:ndrg1a -/-	-4.97	-23.75 to 13.81	No	ns	0.9979
Row 2:ndrg1a -/- vs. Row 4:wt	12.95	-5.651 to 31.56	No	ns	0.4506
Row 2:ndrg1a -/- vs. Row 4:ndrg1a -/-	56.48	39.20 to 73.76	Yes	****	<0.0001
Row 2:ndrg1a -/- vs. Row 5:wt	33.18	2.779 to 63.57	Yes	*	0.02
Row 2:ndrg1a -/- vs. Row 5:ndrg1a -/-	84.86	59.30 to 110.4	Yes	****	<0.0001
Row 3:wt vs. Row 3:ndrg1a -/-	0.4987	-15.84 to 16.83	No	ns	>0.9999
Row 3:wt vs. Row 4:wt	18.42	2.295 to 34.55	Yes	*	0.0114
Row 3:wt vs. Row 4:ndrg1a -/-	61.95	47.37 to 76.52	Yes	****	<0.0001
Row 3:wt vs. Row 5:wt	38.64	9.697 to 67.59	Yes	**	0.0011
Row 3:wt vs. Row 5:ndrg1a -/-	90.33	66.51 to 114.1	Yes	****	<0.0001
Row 3:ndrg1a -/- vs. Row 4:wt	17.92	2.755 to 33.09	Yes	**	0.0073
Row 3:ndrg1a -/- vs. Row 4:ndrg1a -/-	61.45	47.94 to 74.96	Yes	****	<0.0001
Row 3:ndrg1a -/- vs. Row 5:wt	38.15	9.721 to 66.57	Yes	***	0.001
Row 3:ndrg1a -/- vs. Row 5:ndrg1a -/-	89.83	66.65 to 113.0	Yes	****	<0.0001
Row 4:wt vs. Row 4:ndrg1a -/-	43.53	30.27 to 56.78	Yes	****	<0.0001
Row 4:wt vs. Row 5:wt	20.22	-8.082 to 48.53	No	ns	0.4113
Row 4:wt vs. Row 5:ndrg1a -/-	71.9	48.88 to 94.93	Yes	****	<0.0001
Row 4:ndrg1a -/- vs. Row 5:wt	-23.3	-50.76 to 4.148	No	ns	0.1777
Row 4:ndrg1a -/- vs. Row 5:ndrg1a -/-	28.38	6.405 to 50.35	Yes	**	0.0019
Row 5:wt vs. Row 5:ndrg1a -/-	51.68	18.39 to 84.97	Yes	****	<0.0001
Test details	Predicted (LS) mean 1	Predicted (LS) mean 2	Predicted (LS) mean diff.	SE of diff.	N1	N2	q	DF
Row 1:wt vs. Row 1:ndrg1a -/-	100	100	0	8.806	30	30	0	651
Row 1:wt vs. Row 2:wt	100	95	5	8.237	30	40	0.8585	651
Row 1:wt vs. Row 2:ndrg1a -/-	100	92	8	7.876	30	50	1.436	651
Row 1:wt vs. Row 3:wt	100	97.47	2.532	7.314	30	79	0.4895	651
Row 1:wt vs. Row 3:ndrg1a -/-	100	96.97	3.03	7.108	30	99	0.6029	651
Row 1:wt vs. Row 4:wt	100	79.05	20.95	7.06	30	105	4.197	651
Row 1:wt vs. Row 4:ndrg1a -/-	100	35.52	64.48	6.718	30	183	13.57	651
Row 1:wt vs. Row 5:wt	100	58.82	41.18	10.35	30	17	5.625	651
Row 1:wt vs. Row 5:ndrg1a -/-	100	7.143	92.86	8.961	30	28	14.65	651
Row 1:ndrg1a -/- vs. Row 2:wt	100	95	5	8.237	30	40	0.8585	651
Row 1:ndrg1a -/- vs. Row 2:ndrg1a -/-	100	92	8	7.876	30	50	1.436	651
Row 1:ndrg1a -/- vs. Row 3:wt	100	97.47	2.532	7.314	30	79	0.4895	651
Row 1:ndrg1a -/- vs. Row 3:ndrg1a -/-	100	96.97	3.03	7.108	30	99	0.6029	651
Row 1:ndrg1a -/- vs. Row 4:wt	100	79.05	20.95	7.06	30	105	4.197	651
Row 1:ndrg1a -/- vs. Row 4:ndrg1a -/-	100	35.52	64.48	6.718	30	183	13.57	651
Row 1:ndrg1a -/- vs. Row 5:wt	100	58.82	41.18	10.35	30	17	5.625	651
Row 1:ndrg1a -/- vs. Row 5:ndrg1a -/-	100	7.143	92.86	8.961	30	28	14.65	651
Row 2:wt vs. Row 2:ndrg1a -/-	95	92	3	7.235	40	50	0.5864	651
Row 2:wt vs. Row 3:wt	95	97.47	-2.468	6.618	40	79	0.5275	651
Row 2:wt vs. Row 3:ndrg1a -/-	95	96.97	-1.97	6.389	40	99	0.436	651
Row 2:wt vs. Row 4:wt	95	79.05	15.95	6.337	40	105	3.56	651
Row 2:wt vs. Row 4:ndrg1a -/-	95	35.52	59.48	5.953	40	183	14.13	651
Row 2:wt vs. Row 5:wt	95	58.82	36.18	9.874	40	17	5.181	651
Row 2:wt vs. Row 5:ndrg1a -/-	95	7.143	87.86	8.403	40	28	14.79	651
Row 2:ndrg1a -/- vs. Row 3:wt	92	97.47	-5.468	6.163	50	79	1.255	651
Row 2:ndrg1a -/- vs. Row 3:ndrg1a -/-	92	96.97	-4.97	5.917	50	99	1.188	651
Row 2:ndrg1a -/- vs. Row 4:wt	92	79.05	12.95	5.86	50	105	3.126	651
Row 2:ndrg1a -/- vs. Row 4:ndrg1a -/-	92	35.52	56.48	5.442	50	183	14.68	651
Row 2:ndrg1a -/- vs. Row 5:wt	92	58.82	33.18	9.575	50	17	4.9	651
Row 2:ndrg1a -/- vs. Row 5:ndrg1a -/-	92	7.143	84.86	8.05	50	28	14.91	651
Row 3:wt vs. Row 3:ndrg1a -/-	97.47	96.97	0.4987	5.145	79	99	0.1371	651
Row 3:wt vs. Row 4:wt	97.47	79.05	18.42	5.079	79	105	5.129	651
Row 3:wt vs. Row 4:ndrg1a -/-	97.47	35.52	61.95	4.591	79	183	19.08	651
Row 3:wt vs. Row 5:wt	97.47	58.82	38.64	9.118	79	17	5.994	651
Row 3:wt vs. Row 5:ndrg1a -/-	97.47	7.143	90.33	7.501	79	28	17.03	651
Row 3:ndrg1a -/- vs. Row 4:wt	96.97	79.05	17.92	4.778	99	105	5.305	651
Row 3:ndrg1a -/- vs. Row 4:ndrg1a -/-	96.97	35.52	61.45	4.255	99	183	20.42	651
Row 3:ndrg1a -/- vs. Row 5:wt	96.97	58.82	38.15	8.953	99	17	6.025	651
Row 3:ndrg1a -/- vs. Row 5:ndrg1a -/-	96.97	7.143	89.83	7.3	99	28	17.4	651
Row 4:wt vs. Row 4:ndrg1a -/-	79.05	35.52	43.53	4.175	105	183	14.74	651
Row 4:wt vs. Row 5:wt	79.05	58.82	20.22	8.916	105	17	3.208	651
Row 4:wt vs. Row 5:ndrg1a -/-	79.05	7.143	71.9	7.254	105	28	14.02	651
Row 4:ndrg1a -/- vs. Row 5:wt	35.52	58.82	-23.3	8.647	183	17	3.811	651
Row 4:ndrg1a -/- vs. Row 5:ndrg1a -/-	35.52	7.143	28.38	6.921	183	28	5.799	651
Row 5:wt vs. Row 5:ndrg1a -/-	58.82	7.143	51.68	10.49	17	28	6.97	651
