# Supplementary material for: N-myc downstream regulated gene 1 (ndrg1) functions as a molecular switch for cellular adaptation to hypoxia
Source: eLife journal article supplement (doi:10.7554/elife.74031), 2022-09-16
Supplement: fig2-data3 [file Figure 2-Source Data 3.xlsx]

## Sheet: Source Data
	% No edema
WT 0h	100	100	100	100	100	100	100	100	100	100	100	100	100	100	100	100	100	100	100	100	100	100	100	100	100	100	100	100	100	100
ndrg1a -/- 0h	100	100	100	100	100	100	100	100	100	100	100	100	100	100	100	100	100	100	100	100	100	100	100	100	100	100	100	100	100	100
WT 6h	100	100	100	100	100	100	100	100	100	100	100	100	100	100	100	100	100	100	100	100	100	100	100	100	100	100	100	100	100	100	100	100	100	100	100	100	100	0
ndrg1a -/- 6h	100	100	100	100	100	100	100	100	100	100	100	100	100	100	100	100	100	100	100	100	100	100	100	100	100	100	100	100	100	100	100	100	0	0	0	0	0	0	0	0	0	0	0	0	0	0
WT 12h	100	100	100	100	100	100	100	100	100	100	100	100	100	100	100	100	100	100	100	100	100	100	100	100	100	100	100	100	100	100	100	100	100	100	100	0	0
ndrg1a -/- 12h	100	100	100	100	100	100	100	100	100	100	100	100	100	100	100	100	100	100	100	100	100	100	100	100	100	100	100	100	100	100	0	0	0	0	0	0	0	0	0	0	0	0	0	0	0	0
WT 18h	100	100	100	100	100	100	100	100	100	100	100	100	100	100	100	100	100	100	100	100	100	100	100	100	100	100	100	0	0
ndrg1a -/- 18h	100	100	100	100	100	100	100	100	100	100	100	100	100	100	100	100	100	0	0	0	0	0	0	0	0	0	0	0	0	0	0	0	0	0

## Sheet: Source Data combined edema
	% No edema
WT 0h	100	100	100	100	100	100	100	100	100	100	100	100	100	100	100	100	100	100	100	100	100	100	100	100	100	100	100	100	100	100
ndrg1a -/- 0h	100	100	100	100	100	100	100	100	100	100	100	100	100	100	100	100	100	100	100	100	100	100	100	100	100	100	100	100	100	100
WT 6h	100	100	100	100	100	100	100	100	100	100	100	100	100	100	100	100	100	100	100	100	100	100	100	100	100	100	100	100	100	100	100	100	100	100	100	100	100	0
ndrg1a -/- 6h	100	100	100	100	100	100	100	100	100	100	100	100	100	100	100	100	100	100	100	100	100	100	100	100	100	100	100	100	100	100	100	100	0	0	0	0	0	0	0	0	0	0	0	0	0	0
WT 12h	100	100	100	100	100	100	100	100	100	100	100	100	100	100	100	100	100	100	100	100	100	100	100	100	100	100	100	100	100	100	100	100	100	100	100	0	0
ndrg1a -/- 12h	100	100	100	100	100	100	100	100	100	100	100	100	100	100	100	100	100	100	100	100	100	100	100	100	100	100	100	100	100	100	0	0	0	0	0	0	0	0	0	0	0	0	0	0	0	0
WT 18h	100	100	100	100	100	100	100	100	100	100	100	100	100	100	100	100	100	100	100	100	100	100	100	100	100	100	100	0	0
ndrg1a -/- 18h	100	100	100	100	100	100	100	100	100	100	100	100	100	100	100	100	100	0	0	0	0	0	0	0	0	0	0	0	0	0	0	0	0	0

## Sheet: ANOVA results
Table Analyzed	COMBINED mild severe for ANOVA 24hpf after +2day reoxy edema
Two-way ANOVA	Ordinary
Alpha	0.05
Source of Variation	% of total variation	P value	P value summary	Significant?
Interaction	12.79	<0.0001	****	Yes
Row Factor	0	>0.9999	ns	No
Column Factor	44.17	<0.0001	****	Yes
ANOVA table	SS (Type III)	DF	MS	F (DFn, DFd)	P value
Interaction	185486	7	26498	F (7, 564) = 22.37	P<0.0001
Row Factor	0	7	0	F (7, 564) = 0.000	P>0.9999
Column Factor	640494	1	640494	F (1, 564) = 540.8	P<0.0001
Residual	668031	564	1184
Difference between column means
Predicted (LS) mean of % No edema	83.73
Predicted (LS) mean of % Mild edema + severe edema	16.27
Difference between predicted means	67.46
SE of difference	2.901
95% CI of difference	61.76 to 73.16
Data summary
Number of columns (Column Factor)	2
Number of rows (Row Factor)	8
Number of values	580

## Sheet: Multiple comparisons
Compare cell means regardless of rows and columns
Number of families	1
Number of comparisons per family	120
Alpha	0.05
Tukey's multiple comparisons test	Predicted (LS) mean diff.	95.00% CI of diff.	Below threshold?	Summary	Adjusted P Value
WT 0h:% No edema vs. WT 0h:% Mild edema + severe edema	100	69.42 to 130.6	Yes	****	<0.0001
WT 0h:% No edema vs. ndrg1a -/- 0h:% No edema	0	-30.58 to 30.58	No	ns	>0.9999
WT 0h:% No edema vs. ndrg1a -/- 0h:% Mild edema + severe edema	100	69.42 to 130.6	Yes	****	<0.0001
WT 0h:% No edema vs. WT 6h:% No edema	2.632	-26.30 to 31.56	No	ns	>0.9999
WT 0h:% No edema vs. WT 6h:% Mild edema + severe edema	97.37	68.44 to 126.3	Yes	****	<0.0001
WT 0h:% No edema vs. ndrg1a -/- 6h:% No edema	30.43	2.638 to 58.23	Yes	*	0.0167
WT 0h:% No edema vs. ndrg1a -/- 6h:% Mild edema + severe edema	69.57	41.77 to 97.36	Yes	****	<0.0001
WT 0h:% No edema vs. WT 12h:% No edema	5.405	-23.70 to 34.51	No	ns	>0.9999
WT 0h:% No edema vs. WT 12h:% Mild edema + severe edema	94.59	65.49 to 123.7	Yes	****	<0.0001
WT 0h:% No edema vs. ndrg1a -/- 12h:% No edema	34.78	6.985 to 62.58	Yes	**	0.0021
WT 0h:% No edema vs. ndrg1a -/- 12h:% Mild edema + severe edema	65.22	37.42 to 93.01	Yes	****	<0.0001
WT 0h:% No edema vs. WT 18h:% No edema	6.897	-23.95 to 37.74	No	ns	>0.9999
WT 0h:% No edema vs. WT 18h:% Mild edema + severe edema	93.1	62.26 to 123.9	Yes	****	<0.0001
WT 0h:% No edema vs. ndrg1a -/- 18h:% No edema	50	20.33 to 79.67	Yes	****	<0.0001
WT 0h:% No edema vs. ndrg1a -/- 18h:% Mild edema + severe edema	50	20.33 to 79.67	Yes	****	<0.0001
WT 0h:% Mild edema + severe edema vs. ndrg1a -/- 0h:% No edema	-100	-130.6 to -69.42	Yes	****	<0.0001
WT 0h:% Mild edema + severe edema vs. ndrg1a -/- 0h:% Mild edema + severe edema	-1.421e-14	-30.58 to 30.58	No	ns	>0.9999
WT 0h:% Mild edema + severe edema vs. WT 6h:% No edema	-97.37	-126.3 to -68.44	Yes	****	<0.0001
WT 0h:% Mild edema + severe edema vs. WT 6h:% Mild edema + severe edema	-2.632	-31.56 to 26.30	No	ns	>0.9999
WT 0h:% Mild edema + severe edema vs. ndrg1a -/- 6h:% No edema	-69.57	-97.36 to -41.77	Yes	****	<0.0001
WT 0h:% Mild edema + severe edema vs. ndrg1a -/- 6h:% Mild edema + severe edema	-30.43	-58.23 to -2.638	Yes	*	0.0167
WT 0h:% Mild edema + severe edema vs. WT 12h:% No edema	-94.59	-123.7 to -65.49	Yes	****	<0.0001
WT 0h:% Mild edema + severe edema vs. WT 12h:% Mild edema + severe edema	-5.405	-34.51 to 23.70	No	ns	>0.9999
WT 0h:% Mild edema + severe edema vs. ndrg1a -/- 12h:% No edema	-65.22	-93.01 to -37.42	Yes	****	<0.0001
WT 0h:% Mild edema + severe edema vs. ndrg1a -/- 12h:% Mild edema + severe edema	-34.78	-62.58 to -6.985	Yes	**	0.0021
WT 0h:% Mild edema + severe edema vs. WT 18h:% No edema	-93.1	-123.9 to -62.26	Yes	****	<0.0001
WT 0h:% Mild edema + severe edema vs. WT 18h:% Mild edema + severe edema	-6.897	-37.74 to 23.95	No	ns	>0.9999
WT 0h:% Mild edema + severe edema vs. ndrg1a -/- 18h:% No edema	-50	-79.67 to -20.33	Yes	****	<0.0001
WT 0h:% Mild edema + severe edema vs. ndrg1a -/- 18h:% Mild edema + severe edema	-50	-79.67 to -20.33	Yes	****	<0.0001
ndrg1a -/- 0h:% No edema vs. ndrg1a -/- 0h:% Mild edema + severe edema	100	69.42 to 130.6	Yes	****	<0.0001
ndrg1a -/- 0h:% No edema vs. WT 6h:% No edema	2.632	-26.30 to 31.56	No	ns	>0.9999
ndrg1a -/- 0h:% No edema vs. WT 6h:% Mild edema + severe edema	97.37	68.44 to 126.3	Yes	****	<0.0001
ndrg1a -/- 0h:% No edema vs. ndrg1a -/- 6h:% No edema	30.43	2.638 to 58.23	Yes	*	0.0167
ndrg1a -/- 0h:% No edema vs. ndrg1a -/- 6h:% Mild edema + severe edema	69.57	41.77 to 97.36	Yes	****	<0.0001
ndrg1a -/- 0h:% No edema vs. WT 12h:% No edema	5.405	-23.70 to 34.51	No	ns	>0.9999
ndrg1a -/- 0h:% No edema vs. WT 12h:% Mild edema + severe edema	94.59	65.49 to 123.7	Yes	****	<0.0001
ndrg1a -/- 0h:% No edema vs. ndrg1a -/- 12h:% No edema	34.78	6.985 to 62.58	Yes	**	0.0021
ndrg1a -/- 0h:% No edema vs. ndrg1a -/- 12h:% Mild edema + severe edema	65.22	37.42 to 93.01	Yes	****	<0.0001
ndrg1a -/- 0h:% No edema vs. WT 18h:% No edema	6.897	-23.95 to 37.74	No	ns	>0.9999
ndrg1a -/- 0h:% No edema vs. WT 18h:% Mild edema + severe edema	93.1	62.26 to 123.9	Yes	****	<0.0001
ndrg1a -/- 0h:% No edema vs. ndrg1a -/- 18h:% No edema	50	20.33 to 79.67	Yes	****	<0.0001
ndrg1a -/- 0h:% No edema vs. ndrg1a -/- 18h:% Mild edema + severe edema	50	20.33 to 79.67	Yes	****	<0.0001
ndrg1a -/- 0h:% Mild edema + severe edema vs. WT 6h:% No edema	-97.37	-126.3 to -68.44	Yes	****	<0.0001
ndrg1a -/- 0h:% Mild edema + severe edema vs. WT 6h:% Mild edema + severe edema	-2.632	-31.56 to 26.30	No	ns	>0.9999
ndrg1a -/- 0h:% Mild edema + severe edema vs. ndrg1a -/- 6h:% No edema	-69.57	-97.36 to -41.77	Yes	****	<0.0001
ndrg1a -/- 0h:% Mild edema + severe edema vs. ndrg1a -/- 6h:% Mild edema + severe edema	-30.43	-58.23 to -2.638	Yes	*	0.0167
ndrg1a -/- 0h:% Mild edema + severe edema vs. WT 12h:% No edema	-94.59	-123.7 to -65.49	Yes	****	<0.0001
ndrg1a -/- 0h:% Mild edema + severe edema vs. WT 12h:% Mild edema + severe edema	-5.405	-34.51 to 23.70	No	ns	>0.9999
ndrg1a -/- 0h:% Mild edema + severe edema vs. ndrg1a -/- 12h:% No edema	-65.22	-93.01 to -37.42	Yes	****	<0.0001
ndrg1a -/- 0h:% Mild edema + severe edema vs. ndrg1a -/- 12h:% Mild edema + severe edema	-34.78	-62.58 to -6.985	Yes	**	0.0021
ndrg1a -/- 0h:% Mild edema + severe edema vs. WT 18h:% No edema	-93.1	-123.9 to -62.26	Yes	****	<0.0001
ndrg1a -/- 0h:% Mild edema + severe edema vs. WT 18h:% Mild edema + severe edema	-6.897	-37.74 to 23.95	No	ns	>0.9999
ndrg1a -/- 0h:% Mild edema + severe edema vs. ndrg1a -/- 18h:% No edema	-50	-79.67 to -20.33	Yes	****	<0.0001
ndrg1a -/- 0h:% Mild edema + severe edema vs. ndrg1a -/- 18h:% Mild edema + severe edema	-50	-79.67 to -20.33	Yes	****	<0.0001
WT 6h:% No edema vs. WT 6h:% Mild edema + severe edema	94.74	67.56 to 121.9	Yes	****	<0.0001
WT 6h:% No edema vs. ndrg1a -/- 6h:% No edema	27.8	1.837 to 53.77	Yes	*	0.0224
WT 6h:% No edema vs. ndrg1a -/- 6h:% Mild edema + severe edema	66.93	40.97 to 92.90	Yes	****	<0.0001
WT 6h:% No edema vs. WT 12h:% No edema	2.774	-24.58 to 30.13	No	ns	>0.9999
WT 6h:% No edema vs. WT 12h:% Mild edema + severe edema	91.96	64.61 to 119.3	Yes	****	<0.0001
WT 6h:% No edema vs. ndrg1a -/- 12h:% No edema	32.15	6.185 to 58.12	Yes	**	0.0025
WT 6h:% No edema vs. ndrg1a -/- 12h:% Mild edema + severe edema	62.59	36.62 to 88.55	Yes	****	<0.0001
WT 6h:% No edema vs. WT 18h:% No edema	4.265	-24.94 to 33.47	No	ns	>0.9999
WT 6h:% No edema vs. WT 18h:% Mild edema + severe edema	90.47	61.27 to 119.7	Yes	****	<0.0001
WT 6h:% No edema vs. ndrg1a -/- 18h:% No edema	47.37	19.41 to 75.33	Yes	****	<0.0001
WT 6h:% No edema vs. ndrg1a -/- 18h:% Mild edema + severe edema	47.37	19.41 to 75.33	Yes	****	<0.0001
WT 6h:% Mild edema + severe edema vs. ndrg1a -/- 6h:% No edema	-66.93	-92.90 to -40.97	Yes	****	<0.0001
WT 6h:% Mild edema + severe edema vs. ndrg1a -/- 6h:% Mild edema + severe edema	-27.8	-53.77 to -1.837	Yes	*	0.0224
WT 6h:% Mild edema + severe edema vs. WT 12h:% No edema	-91.96	-119.3 to -64.61	Yes	****	<0.0001
WT 6h:% Mild edema + severe edema vs. WT 12h:% Mild edema + severe edema	-2.774	-30.13 to 24.58	No	ns	>0.9999
WT 6h:% Mild edema + severe edema vs. ndrg1a -/- 12h:% No edema	-62.59	-88.55 to -36.62	Yes	****	<0.0001
WT 6h:% Mild edema + severe edema vs. ndrg1a -/- 12h:% Mild edema + severe edema	-32.15	-58.12 to -6.185	Yes	**	0.0025
WT 6h:% Mild edema + severe edema vs. WT 18h:% No edema	-90.47	-119.7 to -61.27	Yes	****	<0.0001
WT 6h:% Mild edema + severe edema vs. WT 18h:% Mild edema + severe edema	-4.265	-33.47 to 24.94	No	ns	>0.9999
WT 6h:% Mild edema + severe edema vs. ndrg1a -/- 18h:% No edema	-47.37	-75.33 to -19.41	Yes	****	<0.0001
WT 6h:% Mild edema + severe edema vs. ndrg1a -/- 18h:% Mild edema + severe edema	-47.37	-75.33 to -19.41	Yes	****	<0.0001
ndrg1a -/- 6h:% No edema vs. ndrg1a -/- 6h:% Mild edema + severe edema	39.13	14.43 to 63.83	Yes	****	<0.0001
ndrg1a -/- 6h:% No edema vs. WT 12h:% No edema	-25.03	-51.19 to 1.128	No	ns	0.0783
ndrg1a -/- 6h:% No edema vs. WT 12h:% Mild edema + severe edema	64.16	38.00 to 90.32	Yes	****	<0.0001
ndrg1a -/- 6h:% No edema vs. ndrg1a -/- 12h:% No edema	4.348	-20.35 to 29.05	No	ns	>0.9999
ndrg1a -/- 6h:% No edema vs. ndrg1a -/- 12h:% Mild edema + severe edema	34.78	10.08 to 59.48	Yes	***	0.0002
ndrg1a -/- 6h:% No edema vs. WT 18h:% No edema	-23.54	-51.62 to 4.548	No	ns	0.2261
ndrg1a -/- 6h:% No edema vs. WT 18h:% Mild edema + severe edema	62.67	34.58 to 90.75	Yes	****	<0.0001
ndrg1a -/- 6h:% No edema vs. ndrg1a -/- 18h:% No edema	19.57	-7.224 to 46.35	No	ns	0.463
ndrg1a -/- 6h:% No edema vs. ndrg1a -/- 18h:% Mild edema + severe edema	19.57	-7.224 to 46.35	No	ns	0.463
ndrg1a -/- 6h:% Mild edema + severe edema vs. WT 12h:% No edema	-64.16	-90.32 to -38.00	Yes	****	<0.0001
ndrg1a -/- 6h:% Mild edema + severe edema vs. WT 12h:% Mild edema + severe edema	25.03	-1.128 to 51.19	No	ns	0.0783
ndrg1a -/- 6h:% Mild edema + severe edema vs. ndrg1a -/- 12h:% No edema	-34.78	-59.48 to -10.08	Yes	***	0.0002
ndrg1a -/- 6h:% Mild edema + severe edema vs. ndrg1a -/- 12h:% Mild edema + severe edema	-4.348	-29.05 to 20.35	No	ns	>0.9999
ndrg1a -/- 6h:% Mild edema + severe edema vs. WT 18h:% No edema	-62.67	-90.75 to -34.58	Yes	****	<0.0001
ndrg1a -/- 6h:% Mild edema + severe edema vs. WT 18h:% Mild edema + severe edema	23.54	-4.548 to 51.62	No	ns	0.2261
ndrg1a -/- 6h:% Mild edema + severe edema vs. ndrg1a -/- 18h:% No edema	-19.57	-46.35 to 7.224	No	ns	0.463
ndrg1a -/- 6h:% Mild edema + severe edema vs. ndrg1a -/- 18h:% Mild edema + severe edema	-19.57	-46.35 to 7.224	No	ns	0.463
WT 12h:% No edema vs. WT 12h:% Mild edema + severe edema	89.19	61.65 to 116.7	Yes	****	<0.0001
WT 12h:% No edema vs. ndrg1a -/- 12h:% No edema	29.38	3.220 to 55.53	Yes	*	0.0118
WT 12h:% No edema vs. ndrg1a -/- 12h:% Mild edema + severe edema	59.81	33.65 to 85.97	Yes	****	<0.0001
WT 12h:% No edema vs. WT 18h:% No edema	1.491	-27.89 to 30.87	No	ns	>0.9999
WT 12h:% No edema vs. WT 18h:% Mild edema + severe edema	87.7	58.32 to 117.1	Yes	****	<0.0001
WT 12h:% No edema vs. ndrg1a -/- 18h:% No edema	44.59	16.45 to 72.73	Yes	****	<0.0001
WT 12h:% No edema vs. ndrg1a -/- 18h:% Mild edema + severe edema	44.59	16.45 to 72.73	Yes	****	<0.0001
WT 12h:% Mild edema + severe edema vs. ndrg1a -/- 12h:% No edema	-59.81	-85.97 to -33.65	Yes	****	<0.0001
WT 12h:% Mild edema + severe edema vs. ndrg1a -/- 12h:% Mild edema + severe edema	-29.38	-55.53 to -3.220	Yes	*	0.0118
WT 12h:% Mild edema + severe edema vs. WT 18h:% No edema	-87.7	-117.1 to -58.32	Yes	****	<0.0001
WT 12h:% Mild edema + severe edema vs. WT 18h:% Mild edema + severe edema	-1.491	-30.87 to 27.89	No	ns	>0.9999
WT 12h:% Mild edema + severe edema vs. ndrg1a -/- 18h:% No edema	-44.59	-72.73 to -16.45	Yes	****	<0.0001
WT 12h:% Mild edema + severe edema vs. ndrg1a -/- 18h:% Mild edema + severe edema	-44.59	-72.73 to -16.45	Yes	****	<0.0001
ndrg1a -/- 12h:% No edema vs. ndrg1a -/- 12h:% Mild edema + severe edema	30.43	5.736 to 55.13	Yes	**	0.0027
ndrg1a -/- 12h:% No edema vs. WT 18h:% No edema	-27.89	-55.97 to 0.1998	No	ns	0.054
ndrg1a -/- 12h:% No edema vs. WT 18h:% Mild edema + severe edema	58.32	30.24 to 86.41	Yes	****	<0.0001
ndrg1a -/- 12h:% No edema vs. ndrg1a -/- 18h:% No edema	15.22	-11.57 to 42.01	No	ns	0.8486
ndrg1a -/- 12h:% No edema vs. ndrg1a -/- 18h:% Mild edema + severe edema	15.22	-11.57 to 42.01	No	ns	0.8486
ndrg1a -/- 12h:% Mild edema + severe edema vs. WT 18h:% No edema	-58.32	-86.41 to -30.24	Yes	****	<0.0001
ndrg1a -/- 12h:% Mild edema + severe edema vs. WT 18h:% Mild edema + severe edema	27.89	-0.1998 to 55.97	No	ns	0.054
ndrg1a -/- 12h:% Mild edema + severe edema vs. ndrg1a -/- 18h:% No edema	-15.22	-42.01 to 11.57	No	ns	0.8486
ndrg1a -/- 12h:% Mild edema + severe edema vs. ndrg1a -/- 18h:% Mild edema + severe edema	-15.22	-42.01 to 11.57	No	ns	0.8486
WT 18h:% No edema vs. WT 18h:% Mild edema + severe edema	86.21	55.10 to 117.3	Yes	****	<0.0001
WT 18h:% No edema vs. ndrg1a -/- 18h:% No edema	43.1	13.16 to 73.04	Yes	***	0.0001
WT 18h:% No edema vs. ndrg1a -/- 18h:% Mild edema + severe edema	43.1	13.16 to 73.04	Yes	***	0.0001
WT 18h:% Mild edema + severe edema vs. ndrg1a -/- 18h:% No edema	-43.1	-73.04 to -13.16	Yes	***	0.0001
WT 18h:% Mild edema + severe edema vs. ndrg1a -/- 18h:% Mild edema + severe edema	-43.1	-73.04 to -13.16	Yes	***	0.0001
ndrg1a -/- 18h:% No edema vs. ndrg1a -/- 18h:% Mild edema + severe edema	0	-28.73 to 28.73	No	ns	>0.9999
Test details	Predicted (LS) mean 1	Predicted (LS) mean 2	Predicted (LS) mean diff.	SE of diff.	N1	N2	q	DF
WT 0h:% No edema vs. WT 0h:% Mild edema + severe edema	100	-1.421e-14	100	8.886	30	30	15.91	564
WT 0h:% No edema vs. ndrg1a -/- 0h:% No edema	100	100	0	8.886	30	30	0	564
WT 0h:% No edema vs. ndrg1a -/- 0h:% Mild edema + severe edema	100	0	100	8.886	30	30	15.91	564
WT 0h:% No edema vs. WT 6h:% No edema	100	97.37	2.632	8.405	30	38	0.4428	564
WT 0h:% No edema vs. WT 6h:% Mild edema + severe edema	100	2.632	97.37	8.405	30	38	16.38	564
WT 0h:% No edema vs. ndrg1a -/- 6h:% No edema	100	69.57	30.43	8.077	30	46	5.329	564
WT 0h:% No edema vs. ndrg1a -/- 6h:% Mild edema + severe edema	100	30.43	69.57	8.077	30	46	12.18	564
WT 0h:% No edema vs. WT 12h:% No edema	100	94.59	5.405	8.455	30	37	0.9041	564
WT 0h:% No edema vs. WT 12h:% Mild edema + severe edema	100	5.405	94.59	8.455	30	37	15.82	564
WT 0h:% No edema vs. ndrg1a -/- 12h:% No edema	100	65.22	34.78	8.077	30	46	6.09	564
WT 0h:% No edema vs. ndrg1a -/- 12h:% Mild edema + severe edema	100	34.78	65.22	8.077	30	46	11.42	564
WT 0h:% No edema vs. WT 18h:% No edema	100	93.1	6.897	8.962	30	29	1.088	564
WT 0h:% No edema vs. WT 18h:% Mild edema + severe edema	100	6.897	93.1	8.962	30	29	14.69	564
WT 0h:% No edema vs. ndrg1a -/- 18h:% No edema	100	50	50	8.621	30	34	8.202	564
WT 0h:% No edema vs. ndrg1a -/- 18h:% Mild edema + severe edema	100	50	50	8.621	30	34	8.202	564
WT 0h:% Mild edema + severe edema vs. ndrg1a -/- 0h:% No edema	-1.421e-14	100	-100	8.886	30	30	15.91	564
WT 0h:% Mild edema + severe edema vs. ndrg1a -/- 0h:% Mild edema + severe edema	-1.421e-14	0	-1.421e-14	8.886	30	30	2.262e-15	564
WT 0h:% Mild edema + severe edema vs. WT 6h:% No edema	-1.421e-14	97.37	-97.37	8.405	30	38	16.38	564
WT 0h:% Mild edema + severe edema vs. WT 6h:% Mild edema + severe edema	-1.421e-14	2.632	-2.632	8.405	30	38	0.4428	564
WT 0h:% Mild edema + severe edema vs. ndrg1a -/- 6h:% No edema	-1.421e-14	69.57	-69.57	8.077	30	46	12.18	564
WT 0h:% Mild edema + severe edema vs. ndrg1a -/- 6h:% Mild edema + severe edema	-1.421e-14	30.43	-30.43	8.077	30	46	5.329	564
WT 0h:% Mild edema + severe edema vs. WT 12h:% No edema	-1.421e-14	94.59	-94.59	8.455	30	37	15.82	564
WT 0h:% Mild edema + severe edema vs. WT 12h:% Mild edema + severe edema	-1.421e-14	5.405	-5.405	8.455	30	37	0.9041	564
WT 0h:% Mild edema + severe edema vs. ndrg1a -/- 12h:% No edema	-1.421e-14	65.22	-65.22	8.077	30	46	11.42	564
WT 0h:% Mild edema + severe edema vs. ndrg1a -/- 12h:% Mild edema + severe edema	-1.421e-14	34.78	-34.78	8.077	30	46	6.09	564
WT 0h:% Mild edema + severe edema vs. WT 18h:% No edema	-1.421e-14	93.1	-93.1	8.962	30	29	14.69	564
WT 0h:% Mild edema + severe edema vs. WT 18h:% Mild edema + severe edema	-1.421e-14	6.897	-6.897	8.962	30	29	1.088	564
WT 0h:% Mild edema + severe edema vs. ndrg1a -/- 18h:% No edema	-1.421e-14	50	-50	8.621	30	34	8.202	564
WT 0h:% Mild edema + severe edema vs. ndrg1a -/- 18h:% Mild edema + severe edema	-1.421e-14	50	-50	8.621	30	34	8.202	564
ndrg1a -/- 0h:% No edema vs. ndrg1a -/- 0h:% Mild edema + severe edema	100	0	100	8.886	30	30	15.91	564
ndrg1a -/- 0h:% No edema vs. WT 6h:% No edema	100	97.37	2.632	8.405	30	38	0.4428	564
ndrg1a -/- 0h:% No edema vs. WT 6h:% Mild edema + severe edema	100	2.632	97.37	8.405	30	38	16.38	564
ndrg1a -/- 0h:% No edema vs. ndrg1a -/- 6h:% No edema	100	69.57	30.43	8.077	30	46	5.329	564
ndrg1a -/- 0h:% No edema vs. ndrg1a -/- 6h:% Mild edema + severe edema	100	30.43	69.57	8.077	30	46	12.18	564
ndrg1a -/- 0h:% No edema vs. WT 12h:% No edema	100	94.59	5.405	8.455	30	37	0.9041	564
ndrg1a -/- 0h:% No edema vs. WT 12h:% Mild edema + severe edema	100	5.405	94.59	8.455	30	37	15.82	564
ndrg1a -/- 0h:% No edema vs. ndrg1a -/- 12h:% No edema	100	65.22	34.78	8.077	30	46	6.09	564
ndrg1a -/- 0h:% No edema vs. ndrg1a -/- 12h:% Mild edema + severe edema	100	34.78	65.22	8.077	30	46	11.42	564
ndrg1a -/- 0h:% No edema vs. WT 18h:% No edema	100	93.1	6.897	8.962	30	29	1.088	564
ndrg1a -/- 0h:% No edema vs. WT 18h:% Mild edema + severe edema	100	6.897	93.1	8.962	30	29	14.69	564
ndrg1a -/- 0h:% No edema vs. ndrg1a -/- 18h:% No edema	100	50	50	8.621	30	34	8.202	564
ndrg1a -/- 0h:% No edema vs. ndrg1a -/- 18h:% Mild edema + severe edema	100	50	50	8.621	30	34	8.202	564
ndrg1a -/- 0h:% Mild edema + severe edema vs. WT 6h:% No edema	0	97.37	-97.37	8.405	30	38	16.38	564
ndrg1a -/- 0h:% Mild edema + severe edema vs. WT 6h:% Mild edema + severe edema	0	2.632	-2.632	8.405	30	38	0.4428	564
ndrg1a -/- 0h:% Mild edema + severe edema vs. ndrg1a -/- 6h:% No edema	0	69.57	-69.57	8.077	30	46	12.18	564
ndrg1a -/- 0h:% Mild edema + severe edema vs. ndrg1a -/- 6h:% Mild edema + severe edema	0	30.43	-30.43	8.077	30	46	5.329	564
ndrg1a -/- 0h:% Mild edema + severe edema vs. WT 12h:% No edema	0	94.59	-94.59	8.455	30	37	15.82	564
ndrg1a -/- 0h:% Mild edema + severe edema vs. WT 12h:% Mild edema + severe edema	0	5.405	-5.405	8.455	30	37	0.9041	564
ndrg1a -/- 0h:% Mild edema + severe edema vs. ndrg1a -/- 12h:% No edema	0	65.22	-65.22	8.077	30	46	11.42	564
ndrg1a -/- 0h:% Mild edema + severe edema vs. ndrg1a -/- 12h:% Mild edema + severe edema	0	34.78	-34.78	8.077	30	46	6.09	564
ndrg1a -/- 0h:% Mild edema + severe edema vs. WT 18h:% No edema	0	93.1	-93.1	8.962	30	29	14.69	564
ndrg1a -/- 0h:% Mild edema + severe edema vs. WT 18h:% Mild edema + severe edema	0	6.897	-6.897	8.962	30	29	1.088	564
ndrg1a -/- 0h:% Mild edema + severe edema vs. ndrg1a -/- 18h:% No edema	0	50	-50	8.621	30	34	8.202	564
ndrg1a -/- 0h:% Mild edema + severe edema vs. ndrg1a -/- 18h:% Mild edema + severe edema	0	50	-50	8.621	30	34	8.202	564
WT 6h:% No edema vs. WT 6h:% Mild edema + severe edema	97.37	2.632	94.74	7.896	38	38	16.97	564
WT 6h:% No edema vs. ndrg1a -/- 6h:% No edema	97.37	69.57	27.8	7.544	38	46	5.212	564
WT 6h:% No edema vs. ndrg1a -/- 6h:% Mild edema + severe edema	97.37	30.43	66.93	7.544	38	46	12.55	564
WT 6h:% No edema vs. WT 12h:% No edema	97.37	94.59	2.774	7.949	38	37	0.4935	564
WT 6h:% No edema vs. WT 12h:% Mild edema + severe edema	97.37	5.405	91.96	7.949	38	37	16.36	564
WT 6h:% No edema vs. ndrg1a -/- 12h:% No edema	97.37	65.22	32.15	7.544	38	46	6.027	564
WT 6h:% No edema vs. ndrg1a -/- 12h:% Mild edema + severe edema	97.37	34.78	62.59	7.544	38	46	11.73	564
WT 6h:% No edema vs. WT 18h:% No edema	97.37	93.1	4.265	8.486	38	29	0.7108	564
WT 6h:% No edema vs. WT 18h:% Mild edema + severe edema	97.37	6.897	90.47	8.486	38	29	15.08	564
WT 6h:% No edema vs. ndrg1a -/- 18h:% No edema	97.37	50	47.37	8.124	38	34	8.245	564
WT 6h:% No edema vs. ndrg1a -/- 18h:% Mild edema + severe edema	97.37	50	47.37	8.124	38	34	8.245	564
WT 6h:% Mild edema + severe edema vs. ndrg1a -/- 6h:% No edema	2.632	69.57	-66.93	7.544	38	46	12.55	564
WT 6h:% Mild edema + severe edema vs. ndrg1a -/- 6h:% Mild edema + severe edema	2.632	30.43	-27.8	7.544	38	46	5.212	564
WT 6h:% Mild edema + severe edema vs. WT 12h:% No edema	2.632	94.59	-91.96	7.949	38	37	16.36	564
WT 6h:% Mild edema + severe edema vs. WT 12h:% Mild edema + severe edema	2.632	5.405	-2.774	7.949	38	37	0.4935	564
WT 6h:% Mild edema + severe edema vs. ndrg1a -/- 12h:% No edema	2.632	65.22	-62.59	7.544	38	46	11.73	564
WT 6h:% Mild edema + severe edema vs. ndrg1a -/- 12h:% Mild edema + severe edema	2.632	34.78	-32.15	7.544	38	46	6.027	564
WT 6h:% Mild edema + severe edema vs. WT 18h:% No edema	2.632	93.1	-90.47	8.486	38	29	15.08	564
WT 6h:% Mild edema + severe edema vs. WT 18h:% Mild edema + severe edema	2.632	6.897	-4.265	8.486	38	29	0.7108	564
WT 6h:% Mild edema + severe edema vs. ndrg1a -/- 18h:% No edema	2.632	50	-47.37	8.124	38	34	8.245	564
WT 6h:% Mild edema + severe edema vs. ndrg1a -/- 18h:% Mild edema + severe edema	2.632	50	-47.37	8.124	38	34	8.245	564
ndrg1a -/- 6h:% No edema vs. ndrg1a -/- 6h:% Mild edema + severe edema	69.57	30.43	39.13	7.176	46	46	7.711	564
ndrg1a -/- 6h:% No edema vs. WT 12h:% No edema	69.57	94.59	-25.03	7.6	46	37	4.657	564
ndrg1a -/- 6h:% No edema vs. WT 12h:% Mild edema + severe edema	69.57	5.405	64.16	7.6	46	37	11.94	564
ndrg1a -/- 6h:% No edema vs. ndrg1a -/- 12h:% No edema	69.57	65.22	4.348	7.176	46	46	0.8568	564
ndrg1a -/- 6h:% No edema vs. ndrg1a -/- 12h:% Mild edema + severe edema	69.57	34.78	34.78	7.176	46	46	6.855	564
ndrg1a -/- 6h:% No edema vs. WT 18h:% No edema	69.57	93.1	-23.54	8.16	46	29	4.079	564
ndrg1a -/- 6h:% No edema vs. WT 18h:% Mild edema + severe edema	69.57	6.897	62.67	8.16	46	29	10.86	564
ndrg1a -/- 6h:% No edema vs. ndrg1a -/- 18h:% No edema	69.57	50	19.57	7.784	46	34	3.555	564
ndrg1a -/- 6h:% No edema vs. ndrg1a -/- 18h:% Mild edema + severe edema	69.57	50	19.57	7.784	46	34	3.555	564
ndrg1a -/- 6h:% Mild edema + severe edema vs. WT 12h:% No edema	30.43	94.59	-64.16	7.6	46	37	11.94	564
ndrg1a -/- 6h:% Mild edema + severe edema vs. WT 12h:% Mild edema + severe edema	30.43	5.405	25.03	7.6	46	37	4.657	564
ndrg1a -/- 6h:% Mild edema + severe edema vs. ndrg1a -/- 12h:% No edema	30.43	65.22	-34.78	7.176	46	46	6.855	564
ndrg1a -/- 6h:% Mild edema + severe edema vs. ndrg1a -/- 12h:% Mild edema + severe edema	30.43	34.78	-4.348	7.176	46	46	0.8568	564
ndrg1a -/- 6h:% Mild edema + severe edema vs. WT 18h:% No edema	30.43	93.1	-62.67	8.16	46	29	10.86	564
ndrg1a -/- 6h:% Mild edema + severe edema vs. WT 18h:% Mild edema + severe edema	30.43	6.897	23.54	8.16	46	29	4.079	564
ndrg1a -/- 6h:% Mild edema + severe edema vs. ndrg1a -/- 18h:% No edema	30.43	50	-19.57	7.784	46	34	3.555	564
ndrg1a -/- 6h:% Mild edema + severe edema vs. ndrg1a -/- 18h:% Mild edema + severe edema	30.43	50	-19.57	7.784	46	34	3.555	564
WT 12h:% No edema vs. WT 12h:% Mild edema + severe edema	94.59	5.405	89.19	8.002	37	37	15.76	564
WT 12h:% No edema vs. ndrg1a -/- 12h:% No edema	94.59	65.22	29.38	7.6	37	46	5.466	564
WT 12h:% No edema vs. ndrg1a -/- 12h:% Mild edema + severe edema	94.59	34.78	59.81	7.6	37	46	11.13	564
WT 12h:% No edema vs. WT 18h:% No edema	94.59	93.1	1.491	8.536	37	29	0.2471	564
WT 12h:% No edema vs. WT 18h:% Mild edema + severe edema	94.59	6.897	87.7	8.536	37	29	14.53	564
WT 12h:% No edema vs. ndrg1a -/- 18h:% No edema	94.59	50	44.59	8.176	37	34	7.713	564
WT 12h:% No edema vs. ndrg1a -/- 18h:% Mild edema + severe edema	94.59	50	44.59	8.176	37	34	7.713	564
WT 12h:% Mild edema + severe edema vs. ndrg1a -/- 12h:% No edema	5.405	65.22	-59.81	7.6	37	46	11.13	564
WT 12h:% Mild edema + severe edema vs. ndrg1a -/- 12h:% Mild edema + severe edema	5.405	34.78	-29.38	7.6	37	46	5.466	564
WT 12h:% Mild edema + severe edema vs. WT 18h:% No edema	5.405	93.1	-87.7	8.536	37	29	14.53	564
WT 12h:% Mild edema + severe edema vs. WT 18h:% Mild edema + severe edema	5.405	6.897	-1.491	8.536	37	29	0.2471	564
WT 12h:% Mild edema + severe edema vs. ndrg1a -/- 18h:% No edema	5.405	50	-44.59	8.176	37	34	7.713	564
WT 12h:% Mild edema + severe edema vs. ndrg1a -/- 18h:% Mild edema + severe edema	5.405	50	-44.59	8.176	37	34	7.713	564
ndrg1a -/- 12h:% No edema vs. ndrg1a -/- 12h:% Mild edema + severe edema	65.22	34.78	30.43	7.176	46	46	5.998	564
ndrg1a -/- 12h:% No edema vs. WT 18h:% No edema	65.22	93.1	-27.89	8.16	46	29	4.833	564
ndrg1a -/- 12h:% No edema vs. WT 18h:% Mild edema + severe edema	65.22	6.897	58.32	8.16	46	29	10.11	564
ndrg1a -/- 12h:% No edema vs. ndrg1a -/- 18h:% No edema	65.22	50	15.22	7.784	46	34	2.765	564
ndrg1a -/- 12h:% No edema vs. ndrg1a -/- 18h:% Mild edema + severe edema	65.22	50	15.22	7.784	46	34	2.765	564
ndrg1a -/- 12h:% Mild edema + severe edema vs. WT 18h:% No edema	34.78	93.1	-58.32	8.16	46	29	10.11	564
ndrg1a -/- 12h:% Mild edema + severe edema vs. WT 18h:% Mild edema + severe edema	34.78	6.897	27.89	8.16	46	29	4.833	564
ndrg1a -/- 12h:% Mild edema + severe edema vs. ndrg1a -/- 18h:% No edema	34.78	50	-15.22	7.784	46	34	2.765	564
ndrg1a -/- 12h:% Mild edema + severe edema vs. ndrg1a -/- 18h:% Mild edema + severe edema	34.78	50	-15.22	7.784	46	34	2.765	564
WT 18h:% No edema vs. WT 18h:% Mild edema + severe edema	93.1	6.897	86.21	9.038	29	29	13.49	564
WT 18h:% No edema vs. ndrg1a -/- 18h:% No edema	93.1	50	43.1	8.699	29	34	7.007	564
WT 18h:% No edema vs. ndrg1a -/- 18h:% Mild edema + severe edema	93.1	50	43.1	8.699	29	34	7.007	564
WT 18h:% Mild edema + severe edema vs. ndrg1a -/- 18h:% No edema	6.897	50	-43.1	8.699	29	34	7.007	564
WT 18h:% Mild edema + severe edema vs. ndrg1a -/- 18h:% Mild edema + severe edema	6.897	50	-43.1	8.699	29	34	7.007	564
ndrg1a -/- 18h:% No edema vs. ndrg1a -/- 18h:% Mild edema + severe edema	50	50	0	8.347	34	34	0	564
