# Supplementary material for: N-myc downstream regulated gene 1 (ndrg1) functions as a molecular switch for cellular adaptation to hypoxia
Source: eLife journal article supplement (doi:10.7554/elife.74031), 2022-09-16
Supplement: fig2-data4 [file Figure 2-Source Data 4.xlsx]

## Sheet: Source Data
WT	ndrg1a -/-
34.2358	59.8907
47.6494	54.0601
45.1884	74.5037
44.9787	56.6288
40.821	64.1817
57.661	71.3944
44.2594	57.1517
39.962	59.6177
59.8796	31.5759
41.1616	63.3156
38.5112	53.4363
49.1821	63.7802
42.7342	53.4791
37.6948	57.8159
54.0072	75.4891
51.253	68.9805
41.1181
40.8878
31.0733

## Sheet: Unpaired t test
Table Analyzed	12 hr Anoxia Treatment 1
Column B	ndrg1a -/-
vs.	vs.
Column A	WT
Unpaired t test
P value	<0.0001
P value summary	****
Significantly different (P < 0.05)?	Yes
One- or two-tailed P value?	Two-tailed
t, df	t=5.240, df=33
How big is the difference?
Mean of column A	44.33
Mean of column B	60.33
Difference between means (B - A) ± SEM	16.00 ± 3.054
95% confidence interval	9.788 to 22.22
R squared (eta squared)	0.4541
F test to compare variances
F, DFn, Dfd	1.950, 15, 18
P value	0.1781
P value summary	ns
Significantly different (P < 0.05)?	No
Data analyzed
Sample size, column A	19
Sample size, column B	16
