# Supplementary material for: N-myc downstream regulated gene 1 (ndrg1) functions as a molecular switch for cellular adaptation to hypoxia
Source: eLife journal article supplement (doi:10.7554/elife.74031), 2022-09-16
Supplement: fig3-data1 [file Figure 3-Source Data 1.xlsx]

## Sheet: C1 Source Data
	Hours in anoxia	WT anterior pronephros
0		0.269958	0.247295	0.253099		0.365586	0.358109	0.361803		0.288502	0.251172	0.253403		0.29118	0.266175	0.266415		0.180044	0.184273	0.199756		0.235796	0.236509	0.217982		0.223208	0.201738	0.216145		0.324126	0.314995	0.279076
6		0.181565	0.164724	0.174416		0.152802	0.15311	0.171843		0.166068	0.178726	0.157865		0.214113	0.201433	0.201006		0.156312	0.171126	0.13733		0.201984	0.173842	0.169		0.171365	0.155653	0.159644		0.0857324	0.0882677	0.0888275		0.126018	0.143775	0.126178
12		0.180415	0.218774	0.208809		0.193741	0.261069	0.258479		0.323084	0.351978	0.308065		0.309096	0.285568	0.307364		0.108092	0.118339	0.116617		0.104853	0.105052	0.107202		0.135344	0.127709	0.1392		0.12722	0.124662	0.13663		0.123532	0.0984867	0.102917
18		0.0664209	0.0705993	0.0923261		0.173449	0.159261	0.158305		0.123617	0.115959	0.115979		0.141147	0.153165	0.133788
24		0.0674738	0.0724651	0.0847218		0.138325	0.114059	0.124936		0.165897	0.164009	0.121067		0.201822	0.197113	0.143793		0.104452	0.126902	0.093347		0.139689	0.173043	0.180141		0.151682	0.140057	0.155562

## Sheet: ANOVA results
Table Analyzed	normalized anterior pronephros intensity analysis
Two-way ANOVA	Ordinary
Alpha	0.05
Source of Variation	% of total variation	P value	P value summary	Significant?
Interaction	1.69	0.0143	*	Yes
Row Factor	7.471	<0.0001	****	Yes
Column Factor	53.35	<0.0001	****	Yes
ANOVA table	SS (Type III)	DF	MS	F (DFn, DFd)	P value
Interaction	0.06308	4	0.01577	F (4, 206) = 3.192	P=0.0143
Row Factor	0.2789	4	0.06972	F (4, 206) = 14.11	P<0.0001
Column Factor	1.991	1	1.991	F (1, 206) = 403.1	P<0.0001
Residual	1.018	206	0.00494
Difference between column means
Predicted (LS) mean of WT anterior pronephros	0.1733
Predicted (LS) mean of ndrg1a -/- anterior pronephros	0.379
Difference between predicted means	-0.2057
SE of difference	0.01025
95% CI of difference	-0.2259 to -0.1855
Data summary
Number of columns (Column Factor)	2
Number of rows (Row Factor)	5
Number of values	216

## Sheet: Multiple comparisons
Compare cell means regardless of rows and columns
Number of families	1
Number of comparisons per family	45
Alpha	0.05
Tukey's multiple comparisons test	Predicted (LS) mean diff.	95.00% CI of diff.	Below threshold?	Summary	Adjusted P Value
0:WT anterior pronephros vs. 0:ndrg1a -/- anterior pronephros	-0.1516	-0.2146 to -0.08850	Yes	****	<0.0001
0:WT anterior pronephros vs. 6:WT anterior pronephros	0.1037	0.04061 to 0.1668	Yes	****	<0.0001
0:WT anterior pronephros vs. 6:ndrg1a -/- anterior pronephros	-0.124	-0.1856 to -0.06243	Yes	****	<0.0001
0:WT anterior pronephros vs. 12:WT anterior pronephros	0.0774	0.01433 to 0.1405	Yes	**	0.0046
0:WT anterior pronephros vs. 12:ndrg1a -/- anterior pronephros	-0.1448	-0.2120 to -0.07762	Yes	****	<0.0001
0:WT anterior pronephros vs. 18:WT anterior pronephros	0.1366	0.05711 to 0.2161	Yes	****	<0.0001
0:WT anterior pronephros vs. 18:ndrg1a -/- anterior pronephros	-0.04758	-0.1355 to 0.04030	No	ns	0.7761
0:WT anterior pronephros vs. 24:WT anterior pronephros	0.1257	0.05853 to 0.1929	Yes	****	<0.0001
0:WT anterior pronephros vs. 24:ndrg1a -/- anterior pronephros	-0.1173	-0.1874 to -0.04717	Yes	****	<0.0001
0:ndrg1a -/- anterior pronephros vs. 6:WT anterior pronephros	0.2553	0.1941 to 0.3164	Yes	****	<0.0001
0:ndrg1a -/- anterior pronephros vs. 6:ndrg1a -/- anterior pronephros	0.02757	-0.03208 to 0.08721	No	ns	0.8992
0:ndrg1a -/- anterior pronephros vs. 12:WT anterior pronephros	0.229	0.1678 to 0.2902	Yes	****	<0.0001
0:ndrg1a -/- anterior pronephros vs. 12:ndrg1a -/- anterior pronephros	0.006769	-0.05865 to 0.07219	No	ns	>0.9999
0:ndrg1a -/- anterior pronephros vs. 18:WT anterior pronephros	0.2882	0.2102 to 0.3662	Yes	****	<0.0001
0:ndrg1a -/- anterior pronephros vs. 18:ndrg1a -/- anterior pronephros	0.104	0.01745 to 0.1905	Yes	**	0.0061
0:ndrg1a -/- anterior pronephros vs. 24:WT anterior pronephros	0.2773	0.2119 to 0.3427	Yes	****	<0.0001
0:ndrg1a -/- anterior pronephros vs. 24:ndrg1a -/- anterior pronephros	0.03429	-0.03412 to 0.1027	No	ns	0.8452
6:WT anterior pronephros vs. 6:ndrg1a -/- anterior pronephros	-0.2277	-0.2873 to -0.1680	Yes	****	<0.0001
6:WT anterior pronephros vs. 12:WT anterior pronephros	-0.02628	-0.08747 to 0.03491	No	ns	0.9339
6:WT anterior pronephros vs. 12:ndrg1a -/- anterior pronephros	-0.2485	-0.3139 to -0.1831	Yes	****	<0.0001
6:WT anterior pronephros vs. 18:WT anterior pronephros	0.03291	-0.04509 to 0.1109	No	ns	0.9405
6:WT anterior pronephros vs. 18:ndrg1a -/- anterior pronephros	-0.1513	-0.2378 to -0.06472	Yes	****	<0.0001
6:WT anterior pronephros vs. 24:WT anterior pronephros	0.02203	-0.04338 to 0.08745	No	ns	0.9864
6:WT anterior pronephros vs. 24:ndrg1a -/- anterior pronephros	-0.221	-0.2894 to -0.1525	Yes	****	<0.0001
6:ndrg1a -/- anterior pronephros vs. 12:WT anterior pronephros	0.2014	0.1418 to 0.2610	Yes	****	<0.0001
6:ndrg1a -/- anterior pronephros vs. 12:ndrg1a -/- anterior pronephros	-0.0208	-0.08477 to 0.04317	No	ns	0.9894
6:ndrg1a -/- anterior pronephros vs. 18:WT anterior pronephros	0.2606	0.1838 to 0.3374	Yes	****	<0.0001
6:ndrg1a -/- anterior pronephros vs. 18:ndrg1a -/- anterior pronephros	0.07642	-0.009025 to 0.1619	No	ns	0.1237
6:ndrg1a -/- anterior pronephros vs. 24:WT anterior pronephros	0.2497	0.1857 to 0.3137	Yes	****	<0.0001
6:ndrg1a -/- anterior pronephros vs. 24:ndrg1a -/- anterior pronephros	0.006726	-0.06031 to 0.07376	No	ns	>0.9999
12:WT anterior pronephros vs. 12:ndrg1a -/- anterior pronephros	-0.2222	-0.2876 to -0.1568	Yes	****	<0.0001
12:WT anterior pronephros vs. 18:WT anterior pronephros	0.05919	-0.01881 to 0.1372	No	ns	0.3152
12:WT anterior pronephros vs. 18:ndrg1a -/- anterior pronephros	-0.125	-0.2115 to -0.03844	Yes	***	0.0003
12:WT anterior pronephros vs. 24:WT anterior pronephros	0.04831	-0.01710 to 0.1137	No	ns	0.3541
12:WT anterior pronephros vs. 24:ndrg1a -/- anterior pronephros	-0.1947	-0.2631 to -0.1263	Yes	****	<0.0001
12:ndrg1a -/- anterior pronephros vs. 18:WT anterior pronephros	0.2814	0.2000 to 0.3628	Yes	****	<0.0001
12:ndrg1a -/- anterior pronephros vs. 18:ndrg1a -/- anterior pronephros	0.09722	0.007647 to 0.1868	Yes	*	0.0217
12:ndrg1a -/- anterior pronephros vs. 24:WT anterior pronephros	0.2705	0.2011 to 0.3399	Yes	****	<0.0001
12:ndrg1a -/- anterior pronephros vs. 24:ndrg1a -/- anterior pronephros	0.02752	-0.04469 to 0.09974	No	ns	0.9686
18:WT anterior pronephros vs. 18:ndrg1a -/- anterior pronephros	-0.1842	-0.2833 to -0.08503	Yes	****	<0.0001
18:WT anterior pronephros vs. 24:WT anterior pronephros	-0.01088	-0.09224 to 0.07048	No	ns	>0.9999
18:WT anterior pronephros vs. 24:ndrg1a -/- anterior pronephros	-0.2539	-0.3377 to -0.1701	Yes	****	<0.0001
18:ndrg1a -/- anterior pronephros vs. 24:WT anterior pronephros	0.1733	0.08372 to 0.2629	Yes	****	<0.0001
18:ndrg1a -/- anterior pronephros vs. 24:ndrg1a -/- anterior pronephros	-0.0697	-0.1615 to 0.02209	No	ns	0.3143
24:WT anterior pronephros vs. 24:ndrg1a -/- anterior pronephros	-0.243	-0.3152 to -0.1708	Yes	****	<0.0001
Test details	Predicted (LS) mean 1	Predicted (LS) mean 2	Predicted (LS) mean diff.	SE of diff.	N1	N2	q	DF
0:WT anterior pronephros vs. 0:ndrg1a -/- anterior pronephros	0.2619	0.4135	-0.1516	0.01972	24	27	10.87	206
0:WT anterior pronephros vs. 6:WT anterior pronephros	0.2619	0.1582	0.1037	0.01972	24	27	7.436	206
0:WT anterior pronephros vs. 6:ndrg1a -/- anterior pronephros	0.2619	0.3859	-0.124	0.01925	24	30	9.11	206
0:WT anterior pronephros vs. 12:WT anterior pronephros	0.2619	0.1845	0.0774	0.01972	24	27	5.551	206
0:WT anterior pronephros vs. 12:ndrg1a -/- anterior pronephros	0.2619	0.4067	-0.1448	0.021	24	21	9.75	206
0:WT anterior pronephros vs. 18:WT anterior pronephros	0.2619	0.1253	0.1366	0.02485	24	12	7.774	206
0:WT anterior pronephros vs. 18:ndrg1a -/- anterior pronephros	0.2619	0.3095	-0.04758	0.02747	24	9	2.449	206
0:WT anterior pronephros vs. 24:WT anterior pronephros	0.2619	0.1362	0.1257	0.021	24	21	8.465	206
0:WT anterior pronephros vs. 24:ndrg1a -/- anterior pronephros	0.2619	0.3792	-0.1173	0.02192	24	18	7.568	206
0:ndrg1a -/- anterior pronephros vs. 6:WT anterior pronephros	0.4135	0.1582	0.2553	0.01913	27	27	18.87	206
0:ndrg1a -/- anterior pronephros vs. 6:ndrg1a -/- anterior pronephros	0.4135	0.3859	0.02757	0.01865	27	30	2.091	206
0:ndrg1a -/- anterior pronephros vs. 12:WT anterior pronephros	0.4135	0.1845	0.229	0.01913	27	27	16.93	206
0:ndrg1a -/- anterior pronephros vs. 12:ndrg1a -/- anterior pronephros	0.4135	0.4067	0.006769	0.02045	27	21	0.4681	206
0:ndrg1a -/- anterior pronephros vs. 18:WT anterior pronephros	0.4135	0.1253	0.2882	0.02439	27	12	16.71	206
0:ndrg1a -/- anterior pronephros vs. 18:ndrg1a -/- anterior pronephros	0.4135	0.3095	0.104	0.02705	27	9	5.436	206
0:ndrg1a -/- anterior pronephros vs. 24:WT anterior pronephros	0.4135	0.1362	0.2773	0.02045	27	21	19.17	206
0:ndrg1a -/- anterior pronephros vs. 24:ndrg1a -/- anterior pronephros	0.4135	0.3792	0.03429	0.02139	27	18	2.267	206
6:WT anterior pronephros vs. 6:ndrg1a -/- anterior pronephros	0.1582	0.3859	-0.2277	0.01865	27	30	17.27	206
6:WT anterior pronephros vs. 12:WT anterior pronephros	0.1582	0.1845	-0.02628	0.01913	27	27	1.943	206
6:WT anterior pronephros vs. 12:ndrg1a -/- anterior pronephros	0.1582	0.4067	-0.2485	0.02045	27	21	17.18	206
6:WT anterior pronephros vs. 18:WT anterior pronephros	0.1582	0.1253	0.03291	0.02439	27	12	1.909	206
6:WT anterior pronephros vs. 18:ndrg1a -/- anterior pronephros	0.1582	0.3095	-0.1513	0.02705	27	9	7.907	206
6:WT anterior pronephros vs. 24:WT anterior pronephros	0.1582	0.1362	0.02203	0.02045	27	21	1.524	206
6:WT anterior pronephros vs. 24:ndrg1a -/- anterior pronephros	0.1582	0.3792	-0.221	0.02139	27	18	14.61	206
6:ndrg1a -/- anterior pronephros vs. 12:WT anterior pronephros	0.3859	0.1845	0.2014	0.01865	30	27	15.28	206
6:ndrg1a -/- anterior pronephros vs. 12:ndrg1a -/- anterior pronephros	0.3859	0.4067	-0.0208	0.02	30	21	1.471	206
6:ndrg1a -/- anterior pronephros vs. 18:WT anterior pronephros	0.3859	0.1253	0.2606	0.02401	30	12	15.35	206
6:ndrg1a -/- anterior pronephros vs. 18:ndrg1a -/- anterior pronephros	0.3859	0.3095	0.07642	0.02671	30	9	4.046	206
6:ndrg1a -/- anterior pronephros vs. 24:WT anterior pronephros	0.3859	0.1362	0.2497	0.02	30	21	17.66	206
6:ndrg1a -/- anterior pronephros vs. 24:ndrg1a -/- anterior pronephros	0.3859	0.3792	0.006726	0.02096	30	18	0.4539	206
12:WT anterior pronephros vs. 12:ndrg1a -/- anterior pronephros	0.1845	0.4067	-0.2222	0.02045	27	21	15.37	206
12:WT anterior pronephros vs. 18:WT anterior pronephros	0.1845	0.1253	0.05919	0.02439	27	12	3.433	206
12:WT anterior pronephros vs. 18:ndrg1a -/- anterior pronephros	0.1845	0.3095	-0.125	0.02705	27	9	6.533	206
12:WT anterior pronephros vs. 24:WT anterior pronephros	0.1845	0.1362	0.04831	0.02045	27	21	3.341	206
12:WT anterior pronephros vs. 24:ndrg1a -/- anterior pronephros	0.1845	0.3792	-0.1947	0.02139	27	18	12.87	206
12:ndrg1a -/- anterior pronephros vs. 18:WT anterior pronephros	0.4067	0.1253	0.2814	0.02544	21	12	15.65	206
12:ndrg1a -/- anterior pronephros vs. 18:ndrg1a -/- anterior pronephros	0.4067	0.3095	0.09722	0.028	21	9	4.91	206
12:ndrg1a -/- anterior pronephros vs. 24:WT anterior pronephros	0.4067	0.1362	0.2705	0.02169	21	21	17.64	206
12:ndrg1a -/- anterior pronephros vs. 24:ndrg1a -/- anterior pronephros	0.4067	0.3792	0.02752	0.02258	21	18	1.724	206
18:WT anterior pronephros vs. 18:ndrg1a -/- anterior pronephros	0.1253	0.3095	-0.1842	0.03099	12	9	8.404	206
18:WT anterior pronephros vs. 24:WT anterior pronephros	0.1253	0.1362	-0.01088	0.02544	12	21	0.6051	206
18:WT anterior pronephros vs. 24:ndrg1a -/- anterior pronephros	0.1253	0.3792	-0.2539	0.02619	12	18	13.71	206
18:ndrg1a -/- anterior pronephros vs. 24:WT anterior pronephros	0.3095	0.1362	0.1733	0.028	9	21	8.752	206
18:ndrg1a -/- anterior pronephros vs. 24:ndrg1a -/- anterior pronephros	0.3095	0.3792	-0.0697	0.02869	9	18	3.435	206
24:WT anterior pronephros vs. 24:ndrg1a -/- anterior pronephros	0.1362	0.3792	-0.243	0.02258	21	18	15.22	206

## Sheet: C2 Source Data
	Hours in anoxia	WT posterior pronephros
0		0.725324	0.692662	0.681691		1	0.943176	0.913936		0.809146	0.780146	0.786412		0.726564	0.715358	0.734449		0.306296	0.298791	0.304658		0.515715	0.49422	0.532993		0.57793	0.560684	0.569383		0.629047	0.645804	0.657784
6		0.434384	0.439809	0.461464		0.330091	0.335381	0.322089		0.245399	0.258805	0.266563		0.410941	0.42816	0.435315		0.282762	0.302332	0.315294		0.492561	0.488551	0.484649		0.273579	0.313811	0.31025		0.299704	0.33474	0.339396		0.387214	0.409745	0.400939
12		0.221561	0.24694	0.238154		0.575785	0.573773	0.570061		0.514703	0.477782	0.476741		0.592189	0.591504	0.599475		0.326535	0.355025	0.346028		0.157353	0.171547	0.168957		0.140236	0.131752	0.165597		0.181495	0.195696	0.165191		0.15235	0.148015	0.128757
18		0.217647	0.224365	0.240007		0.319822	0.340544	0.327534		0.213799	0.207435	0.202745		0.350928	0.351555	0.321793
24		0.145299	0.131075	0.145226		0.321765	0.308312	0.335711		0.335659	0.357876	0.35824		0.481096	0.474631	0.491418		0.207961	0.206654	0.229387		0.433369	0.430001	0.449013		0.399056	0.365401	0.35125

## Sheet: C2 ANOVA results
Table Analyzed	normalized posterior pronephros intensity analysis
Two-way ANOVA	Ordinary
Alpha	0.05
Source of Variation	% of total variation	P value	P value summary	Significant?
Interaction	3.451	0.0008	***	Yes
Row Factor	20.93	<0.0001	****	Yes
Column Factor	33.9	<0.0001	****	Yes
ANOVA table	SS (Type III)	DF	MS	F (DFn, DFd)	P value
Interaction	0.3799	4	0.09498	F (4, 209) = 4.971	P=0.0008
Row Factor	2.304	4	0.576	F (4, 209) = 30.14	P<0.0001
Column Factor	3.732	1	3.732	F (1, 209) = 195.3	P<0.0001
Residual	3.994	209	0.01911
Difference between column means
Predicted (LS) mean of WT posterior pronephros	0.388
Predicted (LS) mean of Group B	0.6622
Difference between predicted means	-0.2742
SE of difference	0.01962
95% CI of difference	-0.3129 to -0.2355
Data summary
Number of columns (Column Factor)	2
Number of rows (Row Factor)	5
Number of values	219

## Sheet: C2 Multiple comparisons
Compare cell means regardless of rows and columns
Number of families	1
Number of comparisons per family	45
Alpha	0.05
Tukey's multiple comparisons test	Predicted (LS) mean diff.	95.00% CI of diff.	Below threshold?	Summary	Adjusted P Value
0:WT posterior pronephros vs. 0:Group B	-0.1335	-0.2575 to -0.009435	Yes	*	0.0239
0:WT posterior pronephros vs. 6:WT posterior pronephros	0.287	0.1630 to 0.4110	Yes	****	<0.0001
0:WT posterior pronephros vs. 6:Group B	-0.06611	-0.1872 to 0.05496	No	ns	0.7675
0:WT posterior pronephros vs. 12:WT posterior pronephros	0.3311	0.2071 to 0.4551	Yes	****	<0.0001
0:WT posterior pronephros vs. 12:Group B	0.007381	-0.1247 to 0.1395	No	ns	>0.9999
0:WT posterior pronephros vs. 18:WT posterior pronephros	0.3736	0.2173 to 0.5299	Yes	****	<0.0001
0:WT posterior pronephros vs. 18:Group B	0.06601	-0.09030 to 0.2223	No	ns	0.9403
0:WT posterior pronephros vs. 24:WT posterior pronephros	0.3187	0.1866 to 0.4508	Yes	****	<0.0001
0:WT posterior pronephros vs. 24:Group B	0.06565	-0.07220 to 0.2035	No	ns	0.8815
0:Group B vs. 6:WT posterior pronephros	0.4204	0.3001 to 0.5408	Yes	****	<0.0001
0:Group B vs. 6:Group B	0.06735	-0.04993 to 0.1846	No	ns	0.7111
0:Group B vs. 12:WT posterior pronephros	0.4645	0.3442 to 0.5849	Yes	****	<0.0001
0:Group B vs. 12:Group B	0.1408	0.01221 to 0.2695	Yes	*	0.0197
0:Group B vs. 18:WT posterior pronephros	0.507	0.3537 to 0.6604	Yes	****	<0.0001
0:Group B vs. 18:Group B	0.1995	0.04609 to 0.3529	Yes	**	0.0019
0:Group B vs. 24:WT posterior pronephros	0.4522	0.3236 to 0.5808	Yes	****	<0.0001
0:Group B vs. 24:Group B	0.1991	0.06459 to 0.3336	Yes	***	0.0002
6:WT posterior pronephros vs. 6:Group B	-0.3531	-0.4704 to -0.2358	Yes	****	<0.0001
6:WT posterior pronephros vs. 12:WT posterior pronephros	0.0441	-0.07622 to 0.1644	No	ns	0.9758
6:WT posterior pronephros vs. 12:Group B	-0.2796	-0.4082 to -0.1510	Yes	****	<0.0001
6:WT posterior pronephros vs. 18:WT posterior pronephros	0.08659	-0.06679 to 0.2400	No	ns	0.731
6:WT posterior pronephros vs. 18:Group B	-0.221	-0.3744 to -0.06759	Yes	***	0.0003
6:WT posterior pronephros vs. 24:WT posterior pronephros	0.03176	-0.09688 to 0.1604	No	ns	0.9987
6:WT posterior pronephros vs. 24:Group B	-0.2213	-0.3559 to -0.08680	Yes	****	<0.0001
6:Group B vs. 12:WT posterior pronephros	0.3972	0.2799 to 0.5145	Yes	****	<0.0001
6:Group B vs. 12:Group B	0.07349	-0.05229 to 0.1993	No	ns	0.6901
6:Group B vs. 18:WT posterior pronephros	0.4397	0.2887 to 0.5907	Yes	****	<0.0001
6:Group B vs. 18:Group B	0.1321	-0.01888 to 0.2831	No	ns	0.1439
6:Group B vs. 24:WT posterior pronephros	0.3849	0.2591 to 0.5106	Yes	****	<0.0001
6:Group B vs. 24:Group B	0.1318	-4.594e-005 to 0.2636	No	ns	0.0502
12:WT posterior pronephros vs. 12:Group B	-0.3237	-0.4523 to -0.1951	Yes	****	<0.0001
12:WT posterior pronephros vs. 18:WT posterior pronephros	0.04249	-0.1109 to 0.1959	No	ns	0.9968
12:WT posterior pronephros vs. 18:Group B	-0.2651	-0.4185 to -0.1117	Yes	****	<0.0001
12:WT posterior pronephros vs. 24:WT posterior pronephros	-0.01234	-0.1410 to 0.1163	No	ns	>0.9999
12:WT posterior pronephros vs. 24:Group B	-0.2654	-0.4000 to -0.1309	Yes	****	<0.0001
12:Group B vs. 18:WT posterior pronephros	0.3662	0.2062 to 0.5262	Yes	****	<0.0001
12:Group B vs. 18:Group B	0.05863	-0.1014 to 0.2186	No	ns	0.9758
12:Group B vs. 24:WT posterior pronephros	0.3114	0.1749 to 0.4478	Yes	****	<0.0001
12:Group B vs. 24:Group B	0.05827	-0.08374 to 0.2003	No	ns	0.9499
18:WT posterior pronephros vs. 18:Group B	-0.3076	-0.4881 to -0.1271	Yes	****	<0.0001
18:WT posterior pronephros vs. 24:WT posterior pronephros	-0.05484	-0.2148 to 0.1051	No	ns	0.9846
18:WT posterior pronephros vs. 24:Group B	-0.3079	-0.4727 to -0.1432	Yes	****	<0.0001
18:Group B vs. 24:WT posterior pronephros	0.2527	0.09274 to 0.4127	Yes	****	<0.0001
18:Group B vs. 24:Group B	-0.0003593	-0.1651 to 0.1644	No	ns	>0.9999
24:WT posterior pronephros vs. 24:Group B	-0.2531	-0.3951 to -0.1111	Yes	****	<0.0001
Test details	Predicted (LS) mean 1	Predicted (LS) mean 2	Predicted (LS) mean diff.	SE of diff.	N1	N2	q	DF
0:WT posterior pronephros vs. 0:Group B	0.6501	0.7836	-0.1335	0.03878	24	27	4.867	209
0:WT posterior pronephros vs. 6:WT posterior pronephros	0.6501	0.3631	0.287	0.03878	24	27	10.47	209
0:WT posterior pronephros vs. 6:Group B	0.6501	0.7162	-0.06611	0.03786	24	30	2.47	209
0:WT posterior pronephros vs. 12:WT posterior pronephros	0.6501	0.319	0.3311	0.03878	24	27	12.07	209
0:WT posterior pronephros vs. 12:Group B	0.6501	0.6427	0.007381	0.0413	24	21	0.2527	209
0:WT posterior pronephros vs. 18:WT posterior pronephros	0.6501	0.2765	0.3736	0.04887	24	12	10.81	209
0:WT posterior pronephros vs. 18:Group B	0.6501	0.5841	0.06601	0.04887	24	12	1.91	209
0:WT posterior pronephros vs. 24:WT posterior pronephros	0.6501	0.3314	0.3187	0.0413	24	21	10.91	209
0:WT posterior pronephros vs. 24:Group B	0.6501	0.5844	0.06565	0.0431	24	18	2.154	209
0:Group B vs. 6:WT posterior pronephros	0.7836	0.3631	0.4204	0.03762	27	27	15.8	209
0:Group B vs. 6:Group B	0.7836	0.7162	0.06735	0.03667	27	30	2.597	209
0:Group B vs. 12:WT posterior pronephros	0.7836	0.319	0.4645	0.03762	27	27	17.46	209
0:Group B vs. 12:Group B	0.7836	0.6427	0.1408	0.04022	27	21	4.952	209
0:Group B vs. 18:WT posterior pronephros	0.7836	0.2765	0.507	0.04796	27	12	14.95	209
0:Group B vs. 18:Group B	0.7836	0.5841	0.1995	0.04796	27	12	5.882	209
0:Group B vs. 24:WT posterior pronephros	0.7836	0.3314	0.4522	0.04022	27	21	15.9	209
0:Group B vs. 24:Group B	0.7836	0.5844	0.1991	0.04206	27	18	6.694	209
6:WT posterior pronephros vs. 6:Group B	0.3631	0.7162	-0.3531	0.03667	27	30	13.62	209
6:WT posterior pronephros vs. 12:WT posterior pronephros	0.3631	0.319	0.0441	0.03762	27	27	1.658	209
6:WT posterior pronephros vs. 12:Group B	0.3631	0.6427	-0.2796	0.04022	27	21	9.831	209
6:WT posterior pronephros vs. 18:WT posterior pronephros	0.3631	0.2765	0.08659	0.04796	27	12	2.553	209
6:WT posterior pronephros vs. 18:Group B	0.3631	0.5841	-0.221	0.04796	27	12	6.516	209
6:WT posterior pronephros vs. 24:WT posterior pronephros	0.3631	0.3314	0.03176	0.04022	27	21	1.117	209
6:WT posterior pronephros vs. 24:Group B	0.3631	0.5844	-0.2213	0.04206	27	18	7.442	209
6:Group B vs. 12:WT posterior pronephros	0.7162	0.319	0.3972	0.03667	30	27	15.32	209
6:Group B vs. 12:Group B	0.7162	0.6427	0.07349	0.03933	30	21	2.643	209
6:Group B vs. 18:WT posterior pronephros	0.7162	0.2765	0.4397	0.04722	30	12	13.17	209
6:Group B vs. 18:Group B	0.7162	0.5841	0.1321	0.04722	30	12	3.957	209
6:Group B vs. 24:WT posterior pronephros	0.7162	0.3314	0.3849	0.03933	30	21	13.84	209
6:Group B vs. 24:Group B	0.7162	0.5844	0.1318	0.04121	30	18	4.521	209
12:WT posterior pronephros vs. 12:Group B	0.319	0.6427	-0.3237	0.04022	27	21	11.38	209
12:WT posterior pronephros vs. 18:WT posterior pronephros	0.319	0.2765	0.04249	0.04796	27	12	1.253	209
12:WT posterior pronephros vs. 18:Group B	0.319	0.5841	-0.2651	0.04796	27	12	7.816	209
12:WT posterior pronephros vs. 24:WT posterior pronephros	0.319	0.3314	-0.01234	0.04022	27	21	0.4341	209
12:WT posterior pronephros vs. 24:Group B	0.319	0.5844	-0.2654	0.04206	27	18	8.924	209
12:Group B vs. 18:WT posterior pronephros	0.6427	0.2765	0.3662	0.05002	21	12	10.35	209
12:Group B vs. 18:Group B	0.6427	0.5841	0.05863	0.05002	21	12	1.658	209
12:Group B vs. 24:WT posterior pronephros	0.6427	0.3314	0.3114	0.04266	21	21	10.32	209
12:Group B vs. 24:Group B	0.6427	0.5844	0.05827	0.0444	21	18	1.856	209
18:WT posterior pronephros vs. 18:Group B	0.2765	0.5841	-0.3076	0.05643	12	12	7.708	209
18:WT posterior pronephros vs. 24:WT posterior pronephros	0.2765	0.3314	-0.05484	0.05002	12	21	1.55	209
18:WT posterior pronephros vs. 24:Group B	0.2765	0.5844	-0.3079	0.05152	12	18	8.453	209
18:Group B vs. 24:WT posterior pronephros	0.5841	0.3314	0.2527	0.05002	12	21	7.145	209
18:Group B vs. 24:Group B	0.5841	0.5844	-0.0003593	0.05152	12	18	0.009862	209
24:WT posterior pronephros vs. 24:Group B	0.3314	0.5844	-0.2531	0.0444	21	18	8.061	209
