# Supplementary material for: N-myc downstream regulated gene 1 (ndrg1) functions as a molecular switch for cellular adaptation to hypoxia
Source: eLife journal article supplement (doi:10.7554/elife.74031), 2022-09-16
Supplement: fig3-figsupp1-data1 [file Figure 3-figure supplement 1-Source Data 1.xlsx]

## Sheet: Source Data
hours re-ox post-anoxia	Anterior pronephros																														Posterior pronephros
0	0.073661	0.042313	0.068486			0.357575					0.0141677	0.107936	0.164618																		0.139529	0.040837	0.110545			0.392372					0.132072	0.19187	0.409504
1	0.069265	0.074299	0.114749			0.582986	0.444628				0.0375345	0.128863	0.0927243																		0.137994	0.124367	0.105636			0.538068	0.547787				0.135925	0.529346	0.288145
3	0.12654	0.110756	0.1091			0.600589	0.513786	0.475409			0.189655	0.21182	0.181793	0.186058																	0.133915	0.220929	0.189444			0.510583	0.700702	0.401798			0.400633	0.517532	0.591198	0.231033
6	0.267912	0.241716	0.090103			0.818621	0.822431	0.72317	0.496918		0.218751	0.727368																			0.319765	0.3697	0.204366			1	0.692814	0.527176	0.699962		0.492246	0.741789
9	0.373662	0.270954	0.182476	0.23445		0.535665	0.817249	0.754584	0.734001		0.201808	0.277996	0.182943	0.116834	0.395527	0.756495															0.616192	0.50699	0.418367	0.449566		0.798065	0.76756	0.892583	0.816408		0.789747	0.862281	0.449916	0.322762	0.770729	1
12	0.389645	0.333361	0.444129																												0.69807	0.61883	1

## Sheet: ANOVA results
Table Analyzed	ALL DATA nka reoxygenation
Two-way ANOVA	Ordinary
Alpha	0.05
Source of Variation	% of total variation	P value	P value summary	Significant?
Interaction	2.997	0.4441	ns	No
Row Factor	32.31	<0.0001	****	Yes
Column Factor	8.155	0.0005	***	Yes
ANOVA table	SS (Type III)	DF	MS	F (DFn, DFd)	P value
Interaction	0.2182	5	0.04365	F (5, 90) = 0.9641	P=0.4441
Row Factor	2.353	5	0.4705	F (5, 90) = 10.39	P<0.0001
Column Factor	0.5938	1	0.5938	F (1, 90) = 13.12	P=0.0005
Residual	4.075	90	0.04527
Difference between column means
Predicted (LS) mean of Anterior pronephros	0.3129
Predicted (LS) mean of Posterior pronephros	0.4837
Difference between predicted means	-0.1707
SE of difference	0.04715
95% CI of difference	-0.2644 to -0.07709
Data summary
Number of columns (Column Factor)	2
Number of rows (Row Factor)	6
Number of values	102

## Sheet: Multiple comparisons
Compare cell means regardless of rows and columns
Number of families	1
Number of comparisons per family	66
Alpha	0.05
Tukey's multiple comparisons test	Predicted (LS) mean diff.	95.00% CI of diff.	Below threshold?	Summary	Adjusted P Value
Row 1:Anterior pronephros vs. Row 1:Posterior pronephros	-0.084	-0.4656 to 0.2976	No	ns	0.9998
Row 1:Anterior pronephros vs. Row 2:Anterior pronephros	-0.07474	-0.4443 to 0.2948	No	ns	>0.9999
Row 1:Anterior pronephros vs. Row 2:Posterior pronephros	-0.1825	-0.5520 to 0.1870	No	ns	0.8821
Row 1:Anterior pronephros vs. Row 3:Anterior pronephros	-0.1522	-0.5040 to 0.1997	No	ns	0.9495
Row 1:Anterior pronephros vs. Row 3:Posterior pronephros	-0.2714	-0.6232 to 0.08048	No	ns	0.3021
Row 1:Anterior pronephros vs. Row 4:Anterior pronephros	-0.3713	-0.7311 to -0.01145	Yes	*	0.0369
Row 1:Anterior pronephros vs. Row 4:Posterior pronephros	-0.4425	-0.8023 to -0.08266	Yes	**	0.0044
Row 1:Anterior pronephros vs. Row 5:Anterior pronephros	-0.2984	-0.6289 to 0.03215	No	ns	0.1172
Row 1:Anterior pronephros vs. Row 5:Posterior pronephros	-0.5574	-0.8879 to -0.2269	Yes	****	<0.0001
Row 1:Anterior pronephros vs. Row 6:Anterior pronephros	-0.2707	-0.7634 to 0.2220	No	ns	0.7896
Row 1:Anterior pronephros vs. Row 6:Posterior pronephros	-0.6539	-1.147 to -0.1612	Yes	**	0.0014
Row 1:Posterior pronephros vs. Row 2:Anterior pronephros	0.009259	-0.3603 to 0.3788	No	ns	>0.9999
Row 1:Posterior pronephros vs. Row 2:Posterior pronephros	-0.09852	-0.4680 to 0.2710	No	ns	0.999
Row 1:Posterior pronephros vs. Row 3:Anterior pronephros	-0.06816	-0.4200 to 0.2837	No	ns	>0.9999
Row 1:Posterior pronephros vs. Row 3:Posterior pronephros	-0.1874	-0.5392 to 0.1645	No	ns	0.8206
Row 1:Posterior pronephros vs. Row 4:Anterior pronephros	-0.2873	-0.6471 to 0.07254	No	ns	0.2538
Row 1:Posterior pronephros vs. Row 4:Posterior pronephros	-0.3585	-0.7183 to 0.001339	No	ns	0.0518
Row 1:Posterior pronephros vs. Row 5:Anterior pronephros	-0.2144	-0.5449 to 0.1161	No	ns	0.5706
Row 1:Posterior pronephros vs. Row 5:Posterior pronephros	-0.4734	-0.8039 to -0.1429	Yes	***	0.0004
Row 1:Posterior pronephros vs. Row 6:Anterior pronephros	-0.1867	-0.6794 to 0.3060	No	ns	0.9807
Row 1:Posterior pronephros vs. Row 6:Posterior pronephros	-0.5699	-1.063 to -0.07721	Yes	*	0.0101
Row 2:Anterior pronephros vs. Row 2:Posterior pronephros	-0.1078	-0.4648 to 0.2492	No	ns	0.997
Row 2:Anterior pronephros vs. Row 3:Anterior pronephros	-0.07742	-0.4161 to 0.2613	No	ns	0.9998
Row 2:Anterior pronephros vs. Row 3:Posterior pronephros	-0.1966	-0.5353 to 0.1420	No	ns	0.7258
Row 2:Anterior pronephros vs. Row 4:Anterior pronephros	-0.2965	-0.6435 to 0.05040	No	ns	0.1706
Row 2:Anterior pronephros vs. Row 4:Posterior pronephros	-0.3677	-0.7147 to -0.02080	Yes	*	0.028
Row 2:Anterior pronephros vs. Row 5:Anterior pronephros	-0.2236	-0.5401 to 0.09281	No	ns	0.4358
Row 2:Anterior pronephros vs. Row 5:Posterior pronephros	-0.4827	-0.7991 to -0.1662	Yes	***	0.0001
Row 2:Anterior pronephros vs. Row 6:Anterior pronephros	-0.1959	-0.6793 to 0.2875	No	ns	0.968
Row 2:Anterior pronephros vs. Row 6:Posterior pronephros	-0.5792	-1.063 to -0.09579	Yes	**	0.0064
Row 2:Posterior pronephros vs. Row 3:Anterior pronephros	0.03036	-0.3083 to 0.3690	No	ns	>0.9999
Row 2:Posterior pronephros vs. Row 3:Posterior pronephros	-0.08887	-0.4275 to 0.2498	No	ns	0.9992
Row 2:Posterior pronephros vs. Row 4:Anterior pronephros	-0.1888	-0.5357 to 0.1582	No	ns	0.7996
Row 2:Posterior pronephros vs. Row 4:Posterior pronephros	-0.26	-0.6069 to 0.08698	No	ns	0.3449
Row 2:Posterior pronephros vs. Row 5:Anterior pronephros	-0.1159	-0.4323 to 0.2006	No	ns	0.9852
Row 2:Posterior pronephros vs. Row 5:Posterior pronephros	-0.3749	-0.6913 to -0.05845	Yes	**	0.0074
Row 2:Posterior pronephros vs. Row 6:Anterior pronephros	-0.08814	-0.5715 to 0.3952	No	ns	>0.9999
Row 2:Posterior pronephros vs. Row 6:Posterior pronephros	-0.4714	-0.9548 to 0.01198	No	ns	0.0628
Row 3:Anterior pronephros vs. Row 3:Posterior pronephros	-0.1192	-0.4385 to 0.2001	No	ns	0.9827
Row 3:Anterior pronephros vs. Row 4:Anterior pronephros	-0.2191	-0.5472 to 0.1089	No	ns	0.5251
Row 3:Anterior pronephros vs. Row 4:Posterior pronephros	-0.2903	-0.6184 to 0.03774	No	ns	0.1352
Row 3:Anterior pronephros vs. Row 5:Anterior pronephros	-0.1462	-0.4418 to 0.1494	No	ns	0.8812
Row 3:Anterior pronephros vs. Row 5:Posterior pronephros	-0.4052	-0.7009 to -0.1096	Yes	***	0.0008
Row 3:Anterior pronephros vs. Row 6:Anterior pronephros	-0.1185	-0.5885 to 0.3515	No	ns	0.9994
Row 3:Anterior pronephros vs. Row 6:Posterior pronephros	-0.5017	-0.9718 to -0.03174	Yes	*	0.0259
Row 3:Posterior pronephros vs. Row 4:Anterior pronephros	-0.09989	-0.4279 to 0.2282	No	ns	0.9968
Row 3:Posterior pronephros vs. Row 4:Posterior pronephros	-0.1711	-0.4991 to 0.1570	No	ns	0.8396
Row 3:Posterior pronephros vs. Row 5:Anterior pronephros	-0.02698	-0.3226 to 0.2686	No	ns	>0.9999
Row 3:Posterior pronephros vs. Row 5:Posterior pronephros	-0.286	-0.5816 to 0.009600	No	ns	0.0673
Row 3:Posterior pronephros vs. Row 6:Anterior pronephros	0.0007317	-0.4693 to 0.4707	No	ns	>0.9999
Row 3:Posterior pronephros vs. Row 6:Posterior pronephros	-0.3825	-0.8525 to 0.08748	No	ns	0.2286
Row 4:Anterior pronephros vs. Row 4:Posterior pronephros	-0.0712	-0.4078 to 0.2654	No	ns	0.9999
Row 4:Anterior pronephros vs. Row 5:Anterior pronephros	0.07291	-0.2321 to 0.3780	No	ns	0.9997
Row 4:Anterior pronephros vs. Row 5:Posterior pronephros	-0.1861	-0.4912 to 0.1189	No	ns	0.6602
Row 4:Anterior pronephros vs. Row 6:Anterior pronephros	0.1006	-0.3754 to 0.5766	No	ns	0.9999
Row 4:Anterior pronephros vs. Row 6:Posterior pronephros	-0.2826	-0.7586 to 0.1934	No	ns	0.6971
Row 4:Posterior pronephros vs. Row 5:Anterior pronephros	0.1441	-0.1609 to 0.4492	No	ns	0.91
Row 4:Posterior pronephros vs. Row 5:Posterior pronephros	-0.1149	-0.4200 to 0.1901	No	ns	0.9815
Row 4:Posterior pronephros vs. Row 6:Anterior pronephros	0.1718	-0.3042 to 0.6478	No	ns	0.9867
Row 4:Posterior pronephros vs. Row 6:Posterior pronephros	-0.2114	-0.6874 to 0.2646	No	ns	0.9394
Row 5:Anterior pronephros vs. Row 5:Posterior pronephros	-0.259	-0.5289 to 0.01083	No	ns	0.0721
Row 5:Anterior pronephros vs. Row 6:Anterior pronephros	0.02772	-0.4265 to 0.4820	No	ns	>0.9999
Row 5:Anterior pronephros vs. Row 6:Posterior pronephros	-0.3555	-0.8098 to 0.09871	No	ns	0.2811
Row 5:Posterior pronephros vs. Row 6:Anterior pronephros	0.2868	-0.1675 to 0.7410	No	ns	0.6113
Row 5:Posterior pronephros vs. Row 6:Posterior pronephros	-0.0965	-0.5508 to 0.3577	No	ns	0.9999
Row 6:Anterior pronephros vs. Row 6:Posterior pronephros	-0.3833	-0.9662 to 0.1997	No	ns	0.5498
Test details	Predicted (LS) mean 1	Predicted (LS) mean 2	Predicted (LS) mean diff.	SE of diff.	N1	N2	q	DF
Row 1:Anterior pronephros vs. Row 1:Posterior pronephros	0.1184	0.2024	-0.084	0.1137	7	7	1.044	90
Row 1:Anterior pronephros vs. Row 2:Anterior pronephros	0.1184	0.1931	-0.07474	0.1101	7	8	0.9598	90
Row 1:Anterior pronephros vs. Row 2:Posterior pronephros	0.1184	0.3009	-0.1825	0.1101	7	8	2.344	90
Row 1:Anterior pronephros vs. Row 3:Anterior pronephros	0.1184	0.2706	-0.1522	0.1049	7	10	2.052	90
Row 1:Anterior pronephros vs. Row 3:Posterior pronephros	0.1184	0.3898	-0.2714	0.1049	7	10	3.66	90
Row 1:Anterior pronephros vs. Row 4:Anterior pronephros	0.1184	0.4897	-0.3713	0.1072	7	9	4.897	90
Row 1:Anterior pronephros vs. Row 4:Posterior pronephros	0.1184	0.5609	-0.4425	0.1072	7	9	5.836	90
Row 1:Anterior pronephros vs. Row 5:Anterior pronephros	0.1184	0.4168	-0.2984	0.09849	7	14	4.284	90
Row 1:Anterior pronephros vs. Row 5:Posterior pronephros	0.1184	0.6758	-0.5574	0.09849	7	14	8.003	90
Row 1:Anterior pronephros vs. Row 6:Anterior pronephros	0.1184	0.389	-0.2707	0.1468	7	3	2.607	90
Row 1:Anterior pronephros vs. Row 6:Posterior pronephros	0.1184	0.7723	-0.6539	0.1468	7	3	6.298	90
Row 1:Posterior pronephros vs. Row 2:Anterior pronephros	0.2024	0.1931	0.009259	0.1101	7	8	0.1189	90
Row 1:Posterior pronephros vs. Row 2:Posterior pronephros	0.2024	0.3009	-0.09852	0.1101	7	8	1.265	90
Row 1:Posterior pronephros vs. Row 3:Anterior pronephros	0.2024	0.2706	-0.06816	0.1049	7	10	0.9193	90
Row 1:Posterior pronephros vs. Row 3:Posterior pronephros	0.2024	0.3898	-0.1874	0.1049	7	10	2.527	90
Row 1:Posterior pronephros vs. Row 4:Anterior pronephros	0.2024	0.4897	-0.2873	0.1072	7	9	3.789	90
Row 1:Posterior pronephros vs. Row 4:Posterior pronephros	0.2024	0.5609	-0.3585	0.1072	7	9	4.728	90
Row 1:Posterior pronephros vs. Row 5:Anterior pronephros	0.2024	0.4168	-0.2144	0.09849	7	14	3.078	90
Row 1:Posterior pronephros vs. Row 5:Posterior pronephros	0.2024	0.6758	-0.4734	0.09849	7	14	6.797	90
Row 1:Posterior pronephros vs. Row 6:Anterior pronephros	0.2024	0.389	-0.1867	0.1468	7	3	1.798	90
Row 1:Posterior pronephros vs. Row 6:Posterior pronephros	0.2024	0.7723	-0.5699	0.1468	7	3	5.489	90
Row 2:Anterior pronephros vs. Row 2:Posterior pronephros	0.1931	0.3009	-0.1078	0.1064	8	8	1.433	90
Row 2:Anterior pronephros vs. Row 3:Anterior pronephros	0.1931	0.2706	-0.07742	0.1009	8	10	1.085	90
Row 2:Anterior pronephros vs. Row 3:Posterior pronephros	0.1931	0.3898	-0.1966	0.1009	8	10	2.755	90
Row 2:Anterior pronephros vs. Row 4:Anterior pronephros	0.1931	0.4897	-0.2965	0.1034	8	9	4.056	90
Row 2:Anterior pronephros vs. Row 4:Posterior pronephros	0.1931	0.5609	-0.3677	0.1034	8	9	5.03	90
Row 2:Anterior pronephros vs. Row 5:Anterior pronephros	0.1931	0.4168	-0.2236	0.0943	8	14	3.354	90
Row 2:Anterior pronephros vs. Row 5:Posterior pronephros	0.1931	0.6758	-0.4827	0.0943	8	14	7.238	90
Row 2:Anterior pronephros vs. Row 6:Anterior pronephros	0.1931	0.389	-0.1959	0.144	8	3	1.923	90
Row 2:Anterior pronephros vs. Row 6:Posterior pronephros	0.1931	0.7723	-0.5792	0.144	8	3	5.686	90
Row 2:Posterior pronephros vs. Row 3:Anterior pronephros	0.3009	0.2706	0.03036	0.1009	8	10	0.4254	90
Row 2:Posterior pronephros vs. Row 3:Posterior pronephros	0.3009	0.3898	-0.08887	0.1009	8	10	1.245	90
Row 2:Posterior pronephros vs. Row 4:Anterior pronephros	0.3009	0.4897	-0.1888	0.1034	8	9	2.582	90
Row 2:Posterior pronephros vs. Row 4:Posterior pronephros	0.3009	0.5609	-0.26	0.1034	8	9	3.556	90
Row 2:Posterior pronephros vs. Row 5:Anterior pronephros	0.3009	0.4168	-0.1159	0.0943	8	14	1.737	90
Row 2:Posterior pronephros vs. Row 5:Posterior pronephros	0.3009	0.6758	-0.3749	0.0943	8	14	5.622	90
Row 2:Posterior pronephros vs. Row 6:Anterior pronephros	0.3009	0.389	-0.08814	0.144	8	3	0.8653	90
Row 2:Posterior pronephros vs. Row 6:Posterior pronephros	0.3009	0.7723	-0.4714	0.144	8	3	4.628	90
Row 3:Anterior pronephros vs. Row 3:Posterior pronephros	0.2706	0.3898	-0.1192	0.09515	10	10	1.772	90
Row 3:Anterior pronephros vs. Row 4:Anterior pronephros	0.2706	0.4897	-0.2191	0.09776	10	9	3.17	90
Row 3:Anterior pronephros vs. Row 4:Posterior pronephros	0.2706	0.5609	-0.2903	0.09776	10	9	4.2	90
Row 3:Anterior pronephros vs. Row 5:Anterior pronephros	0.2706	0.4168	-0.1462	0.0881	10	14	2.347	90
Row 3:Anterior pronephros vs. Row 5:Posterior pronephros	0.2706	0.6758	-0.4052	0.0881	10	14	6.505	90
Row 3:Anterior pronephros vs. Row 6:Anterior pronephros	0.2706	0.389	-0.1185	0.1401	10	3	1.196	90
Row 3:Anterior pronephros vs. Row 6:Posterior pronephros	0.2706	0.7723	-0.5017	0.1401	10	3	5.066	90
Row 3:Posterior pronephros vs. Row 4:Anterior pronephros	0.3898	0.4897	-0.09989	0.09776	10	9	1.445	90
Row 3:Posterior pronephros vs. Row 4:Posterior pronephros	0.3898	0.5609	-0.1711	0.09776	10	9	2.475	90
Row 3:Posterior pronephros vs. Row 5:Anterior pronephros	0.3898	0.4168	-0.02698	0.0881	10	14	0.4332	90
Row 3:Posterior pronephros vs. Row 5:Posterior pronephros	0.3898	0.6758	-0.286	0.0881	10	14	4.592	90
Row 3:Posterior pronephros vs. Row 6:Anterior pronephros	0.3898	0.389	0.0007317	0.1401	10	3	0.007388	90
Row 3:Posterior pronephros vs. Row 6:Posterior pronephros	0.3898	0.7723	-0.3825	0.1401	10	3	3.862	90
Row 4:Anterior pronephros vs. Row 4:Posterior pronephros	0.4897	0.5609	-0.0712	0.1003	9	9	1.004	90
Row 4:Anterior pronephros vs. Row 5:Anterior pronephros	0.4897	0.4168	0.07291	0.09091	9	14	1.134	90
Row 4:Anterior pronephros vs. Row 5:Posterior pronephros	0.4897	0.6758	-0.1861	0.09091	9	14	2.896	90
Row 4:Anterior pronephros vs. Row 6:Anterior pronephros	0.4897	0.389	0.1006	0.1418	9	3	1.003	90
Row 4:Anterior pronephros vs. Row 6:Posterior pronephros	0.4897	0.7723	-0.2826	0.1418	9	3	2.818	90
Row 4:Posterior pronephros vs. Row 5:Anterior pronephros	0.5609	0.4168	0.1441	0.09091	9	14	2.242	90
Row 4:Posterior pronephros vs. Row 5:Posterior pronephros	0.5609	0.6758	-0.1149	0.09091	9	14	1.788	90
Row 4:Posterior pronephros vs. Row 6:Anterior pronephros	0.5609	0.389	0.1718	0.1418	9	3	1.713	90
Row 4:Posterior pronephros vs. Row 6:Posterior pronephros	0.5609	0.7723	-0.2114	0.1418	9	3	2.108	90
Row 5:Anterior pronephros vs. Row 5:Posterior pronephros	0.4168	0.6758	-0.259	0.08042	14	14	4.555	90
Row 5:Anterior pronephros vs. Row 6:Anterior pronephros	0.4168	0.389	0.02772	0.1354	14	3	0.2895	90
Row 5:Anterior pronephros vs. Row 6:Posterior pronephros	0.4168	0.7723	-0.3555	0.1354	14	3	3.714	90
Row 5:Posterior pronephros vs. Row 6:Anterior pronephros	0.6758	0.389	0.2868	0.1354	14	3	2.996	90
Row 5:Posterior pronephros vs. Row 6:Posterior pronephros	0.6758	0.7723	-0.0965	0.1354	14	3	1.008	90
Row 6:Anterior pronephros vs. Row 6:Posterior pronephros	0.389	0.7723	-0.3833	0.1737	3	3	3.12	90
