# Supplementary material for: N-myc downstream regulated gene 1 (ndrg1) functions as a molecular switch for cellular adaptation to hypoxia
Source: eLife journal article supplement (doi:10.7554/elife.74031), 2022-09-16
Supplement: fig4-data1 [file Figure 4-Source Data 1.xlsx]

## Sheet: Source Data
Hours in anoxia	WT NKA intensity in NKA only ionocyte
0	0.265376	0.189078	0.200868	0.237348	0.241909		0.21477	0.281949	0.165832	0.177288	0.148037		0.246024	0.219775	0.214993	0.172061	0.168613		0.185741	0.190746	0.143922	0.177733	0.130241		0.463061	0.494796					0.421771	0.521413	0.475687	0.448388	0.38833		0.323153	0.377069	0.427913	0.436786	0.2892		0.332878	0.402832	0.521754	0.47671	0.701246
6	0.142698	0.206651	0.198309	0.245468	0.144033		0.184295	0.134023	0.256924	0.181515	0.123123		0.20198	0.357691	0.213881	0.251029	0.228339		0.255589	0.169392	0.220776	0.164053	0.152931		0.735711	0.551442	0.555878	0.563385	0.541887		1	0.627197	0.423989	0.458966	0.394472		0.386282	0.548541	0.574475	0.326907	0.304897		0.40778	0.496844	0.353011	0.5482	0.739123		0.375192
12	0.143922	0.149705	0.100767	0.172728	0.0944278		0.194417	0.170059	0.204538	0.190969	0.168502		0.15649	0.232232	0.145368	0.166945	0.103548		0.23201	0.2002	0.173062	0.200979	0.157268		0.384747	0.315987	0.416652	0.417335	0.42433		0.559802	0.526019	0.395325	0.709776	0.58966		0.505886	0.435932	0.434397	0.29466	0.428255		0.733322	0.545982	0.644088	0.625491	0.584371		0.707729
18		0.511687	0.339533	0.455895	0.623614	0.445487		0.8043	0.407268	0.348746	0.535915	0.398226		0.412899	0.331855	0.477564	0.417847	0.412558		0.370415	0.350964	0.523801	0.375874	0.416652
24		0.416311	0.369732	0.3885	0.391571	0.386112		0.391401	0.392936	0.477564	0.541205	0.573281		0.606722	0.500085	0.556048	0.501621	0.360519		0.668316	0.806518	0.687425	0.433373	0.457942		0.3885	0.443781	0.324859	0.271626	0.309674		0.27811	0.407268	0.533868	0.472104	0.48763		0.757038	0.720184	0.355229	0.350964	0.70534
[truncated: 99 more columns]

## Sheet: ANOVA results
Table Analyzed	Normalized NKA intensity by ionocyte expression type
Two-way ANOVA	Ordinary
Alpha	0.05
Source of Variation	% of total variation	P value	P value summary	Significant?
Interaction	4.404	<0.0001	****	Yes
Row Factor	2.207	0.0005	***	Yes
Column Factor	32.07	<0.0001	****	Yes
ANOVA table	SS (Type III)	DF	MS	F (DFn, DFd)	P value
Interaction	0.6983	8	0.08728	F (8, 548) = 5.040	P<0.0001
Row Factor	0.3499	4	0.08748	F (4, 548) = 5.051	P=0.0005
Column Factor	5.085	2	2.542	F (2, 548) = 146.8	P<0.0001
Residual	9.49	548	0.01732
Data summary
Number of columns (Column Factor)	3
Number of rows (Row Factor)	5
Number of values	563

## Sheet: Multiple comparisons
Compare cell means regardless of rows and columns
Number of families	1
Number of comparisons per family	105
Alpha	0.05
Tukey's multiple comparisons test	Predicted (LS) mean diff.	95.00% CI of diff.	Below threshold?	Summary	Adjusted P Value
Row 1:Group A vs. Row 1:Group B	0.05097	-0.05129 to 0.1532	No	ns	0.9332
Row 1:Group A vs. Row 1:Group C	-0.1187	-0.2182 to -0.01924	Yes	**	0.0049
Row 1:Group A vs. Row 2:Group A	-0.06355	-0.1630 to 0.03595	No	ns	0.6821
Row 1:Group A vs. Row 2:Group B	0.1454	0.04591 to 0.2449	Yes	****	<0.0001
Row 1:Group A vs. Row 2:Group C	-0.07553	-0.1745 to 0.02348	No	ns	0.3727
Row 1:Group A vs. Row 3:Group A	-0.04146	-0.1410 to 0.05804	No	ns	0.9854
Row 1:Group A vs. Row 3:Group B	0.134	0.03450 to 0.2335	Yes	***	0.0005
Row 1:Group A vs. Row 3:Group C	-0.06989	-0.1671 to 0.02734	No	ns	0.4795
Row 1:Group A vs. Row 4:Group A	-0.1379	-0.2623 to -0.01348	Yes	*	0.0145
Row 1:Group A vs. Row 4:Group B	0.1277	0.003267 to 0.2521	Yes	*	0.0377
Row 1:Group A vs. Row 4:Group C	-0.09736	-0.2218 to 0.02707	No	ns	0.329
Row 1:Group A vs. Row 5:Group A	-0.1674	-0.2731 to -0.06166	Yes	****	<0.0001
Row 1:Group A vs. Row 5:Group B	0.1371	0.03140 to 0.2428	Yes	**	0.0011
Row 1:Group A vs. Row 5:Group C	-0.1487	-0.2544 to -0.04300	Yes	***	0.0002
Row 1:Group B vs. Row 1:Group C	-0.1697	-0.2671 to -0.07229	Yes	****	<0.0001
Row 1:Group B vs. Row 2:Group A	-0.1145	-0.2119 to -0.01709	Yes	**	0.0062
Row 1:Group B vs. Row 2:Group B	0.09443	-0.002996 to 0.1919	No	ns	0.0687
Row 1:Group B vs. Row 2:Group C	-0.1265	-0.2234 to -0.02958	Yes	**	0.001
Row 1:Group B vs. Row 3:Group A	-0.09244	-0.1899 to 0.004993	No	ns	0.0841
Row 1:Group B vs. Row 3:Group B	0.08302	-0.01441 to 0.1804	No	ns	0.1981
Row 1:Group B vs. Row 3:Group C	-0.1209	-0.2160 to -0.02575	Yes	**	0.0017
Row 1:Group B vs. Row 4:Group A	-0.1889	-0.3117 to -0.06610	Yes	****	<0.0001
Row 1:Group B vs. Row 4:Group B	0.07673	-0.04606 to 0.1995	No	ns	0.715
Row 1:Group B vs. Row 4:Group C	-0.1483	-0.2711 to -0.02555	Yes	**	0.004
Row 1:Group B vs. Row 5:Group A	-0.2184	-0.3221 to -0.1146	Yes	****	<0.0001
Row 1:Group B vs. Row 5:Group B	0.08615	-0.01763 to 0.1899	No	ns	0.2349
Row 1:Group B vs. Row 5:Group C	-0.1997	-0.3035 to -0.09592	Yes	****	<0.0001
Row 1:Group C vs. Row 2:Group A	0.0552	-0.03932 to 0.1497	No	ns	0.804
Row 1:Group C vs. Row 2:Group B	0.2641	0.1696 to 0.3587	Yes	****	<0.0001
Row 1:Group C vs. Row 2:Group C	0.04321	-0.05079 to 0.1372	No	ns	0.9651
Row 1:Group C vs. Row 3:Group A	0.07728	-0.01724 to 0.1718	No	ns	0.2578
Row 1:Group C vs. Row 3:Group B	0.2527	0.1582 to 0.3473	Yes	****	<0.0001
Row 1:Group C vs. Row 3:Group C	0.04886	-0.04327 to 0.1410	No	ns	0.8948
Row 1:Group C vs. Row 4:Group A	-0.01917	-0.1397 to 0.1013	No	ns	>0.9999
Row 1:Group C vs. Row 4:Group B	0.2464	0.1260 to 0.3669	Yes	****	<0.0001
Row 1:Group C vs. Row 4:Group C	0.02138	-0.09911 to 0.1419	No	ns	>0.9999
Row 1:Group C vs. Row 5:Group A	-0.04864	-0.1497 to 0.05241	No	ns	0.9491
Row 1:Group C vs. Row 5:Group B	0.2559	0.1548 to 0.3569	Yes	****	<0.0001
Row 1:Group C vs. Row 5:Group C	-0.02998	-0.1310 to 0.07107	No	ns	0.9996
Row 2:Group A vs. Row 2:Group B	0.209	0.1144 to 0.3035	Yes	****	<0.0001
Row 2:Group A vs. Row 2:Group C	-0.01198	-0.1060 to 0.08202	No	ns	>0.9999
Row 2:Group A vs. Row 3:Group A	0.02208	-0.07244 to 0.1166	No	ns	>0.9999
Row 2:Group A vs. Row 3:Group B	0.1975	0.1030 to 0.2921	Yes	****	<0.0001
Row 2:Group A vs. Row 3:Group C	-0.006341	-0.09847 to 0.08579	No	ns	>0.9999
Row 2:Group A vs. Row 4:Group A	-0.07437	-0.1949 to 0.04612	No	ns	0.7327
Row 2:Group A vs. Row 4:Group B	0.1912	0.07076 to 0.3117	Yes	****	<0.0001
Row 2:Group A vs. Row 4:Group C	-0.03382	-0.1543 to 0.08667	No	ns	0.9998
Row 2:Group A vs. Row 5:Group A	-0.1038	-0.2049 to -0.002789	Yes	*	0.0371
Row 2:Group A vs. Row 5:Group B	0.2007	0.09962 to 0.3017	Yes	****	<0.0001
Row 2:Group A vs. Row 5:Group C	-0.08517	-0.1862 to 0.01587	No	ns	0.213
Row 2:Group B vs. Row 2:Group C	-0.2209	-0.3149 to -0.1269	Yes	****	<0.0001
Row 2:Group B vs. Row 3:Group A	-0.1869	-0.2814 to -0.09235	Yes	****	<0.0001
Row 2:Group B vs. Row 3:Group B	-0.01141	-0.1059 to 0.08311	No	ns	>0.9999
Row 2:Group B vs. Row 3:Group C	-0.2153	-0.3074 to -0.1232	Yes	****	<0.0001
Row 2:Group B vs. Row 4:Group A	-0.2833	-0.4038 to -0.1628	Yes	****	<0.0001
Row 2:Group B vs. Row 4:Group B	-0.01771	-0.1382 to 0.1028	No	ns	>0.9999
Row 2:Group B vs. Row 4:Group C	-0.2428	-0.3633 to -0.1223	Yes	****	<0.0001
Row 2:Group B vs. Row 5:Group A	-0.3128	-0.4138 to -0.2117	Yes	****	<0.0001
Row 2:Group B vs. Row 5:Group B	-0.008286	-0.1093 to 0.09276	No	ns	>0.9999
Row 2:Group B vs. Row 5:Group C	-0.2941	-0.3952 to -0.1931	Yes	****	<0.0001
Row 2:Group C vs. Row 3:Group A	0.03407	-0.05994 to 0.1281	No	ns	0.9963
Row 2:Group C vs. Row 3:Group B	0.2095	0.1155 to 0.3035	Yes	****	<0.0001
Row 2:Group C vs. Row 3:Group C	0.005644	-0.08595 to 0.09724	No	ns	>0.9999
Row 2:Group C vs. Row 4:Group A	-0.06238	-0.1825 to 0.05770	No	ns	0.9092
Row 2:Group C vs. Row 4:Group B	0.2032	0.08314 to 0.3233	Yes	****	<0.0001
Row 2:Group C vs. Row 4:Group C	-0.02183	-0.1419 to 0.09825	No	ns	>0.9999
Row 2:Group C vs. Row 5:Group A	-0.09185	-0.1924 to 0.008714	No	ns	0.1174
Row 2:Group C vs. Row 5:Group B	0.2127	0.1121 to 0.3132	Yes	****	<0.0001
Row 2:Group C vs. Row 5:Group C	-0.07319	-0.1738 to 0.02737	No	ns	0.457
Row 3:Group A vs. Row 3:Group B	0.1755	0.08094 to 0.2700	Yes	****	<0.0001
Row 3:Group A vs. Row 3:Group C	-0.02843	-0.1206 to 0.06370	No	ns	0.9993
Row 3:Group A vs. Row 4:Group A	-0.09645	-0.2169 to 0.02404	No	ns	0.2912
Row 3:Group A vs. Row 4:Group B	0.1692	0.04867 to 0.2897	Yes	***	0.0002
Row 3:Group A vs. Row 4:Group C	-0.0559	-0.1764 to 0.06459	No	ns	0.9623
Row 3:Group A vs. Row 5:Group A	-0.1259	-0.2270 to -0.02487	Yes	**	0.0024
Row 3:Group A vs. Row 5:Group B	0.1786	0.07754 to 0.2796	Yes	****	<0.0001
Row 3:Group A vs. Row 5:Group C	-0.1073	-0.2083 to -0.006213	Yes	*	0.0253
Row 3:Group B vs. Row 3:Group C	-0.2039	-0.2960 to -0.1118	Yes	****	<0.0001
Row 3:Group B vs. Row 4:Group A	-0.2719	-0.3924 to -0.1514	Yes	****	<0.0001
Row 3:Group B vs. Row 4:Group B	-0.006293	-0.1268 to 0.1142	No	ns	>0.9999
Row 3:Group B vs. Row 4:Group C	-0.2314	-0.3518 to -0.1109	Yes	****	<0.0001
Row 3:Group B vs. Row 5:Group A	-0.3014	-0.4024 to -0.2003	Yes	****	<0.0001
Row 3:Group B vs. Row 5:Group B	0.003127	-0.09792 to 0.1042	No	ns	>0.9999
Row 3:Group B vs. Row 5:Group C	-0.2827	-0.3838 to -0.1817	Yes	****	<0.0001
Row 3:Group C vs. Row 4:Group A	-0.06803	-0.1866 to 0.05060	No	ns	0.8243
Row 3:Group C vs. Row 4:Group B	0.1976	0.07897 to 0.3162	Yes	****	<0.0001
Row 3:Group C vs. Row 4:Group C	-0.02748	-0.1461 to 0.09114	No	ns	>0.9999
Row 3:Group C vs. Row 5:Group A	-0.09749	-0.1963 to 0.001316	No	ns	0.0575
Row 3:Group C vs. Row 5:Group B	0.207	0.1082 to 0.3058	Yes	****	<0.0001
Row 3:Group C vs. Row 5:Group C	-0.07883	-0.1776 to 0.01998	No	ns	0.2966
Row 4:Group A vs. Row 4:Group B	0.2656	0.1238 to 0.4074	Yes	****	<0.0001
Row 4:Group A vs. Row 4:Group C	0.04055	-0.1012 to 0.1823	No	ns	0.9997
Row 4:Group A vs. Row 5:Group A	-0.02947	-0.1551 to 0.09620	No	ns	>0.9999
Row 4:Group A vs. Row 5:Group B	0.275	0.1494 to 0.4007	Yes	****	<0.0001
Row 4:Group A vs. Row 5:Group C	-0.01081	-0.1365 to 0.1149	No	ns	>0.9999
Row 4:Group B vs. Row 4:Group C	-0.2251	-0.3668 to -0.08328	Yes	****	<0.0001
Row 4:Group B vs. Row 5:Group A	-0.2951	-0.4208 to -0.1694	Yes	****	<0.0001
Row 4:Group B vs. Row 5:Group B	0.009421	-0.1163 to 0.1351	No	ns	>0.9999
Row 4:Group B vs. Row 5:Group C	-0.2764	-0.4021 to -0.1507	Yes	****	<0.0001
Row 4:Group C vs. Row 5:Group A	-0.07002	-0.1957 to 0.05566	No	ns	0.8535
Row 4:Group C vs. Row 5:Group B	0.2345	0.1088 to 0.3602	Yes	****	<0.0001
Row 4:Group C vs. Row 5:Group C	-0.05136	-0.1770 to 0.07432	No	ns	0.9878
Row 5:Group A vs. Row 5:Group B	0.3045	0.1973 to 0.4117	Yes	****	<0.0001
Row 5:Group A vs. Row 5:Group C	0.01866	-0.08851 to 0.1258	No	ns	>0.9999
Row 5:Group B vs. Row 5:Group C	-0.2858	-0.3930 to -0.1787	Yes	****	<0.0001
Test details	Predicted (LS) mean 1	Predicted (LS) mean 2	Predicted (LS) mean diff.	SE of diff.	N1	N2	q	DF
Row 1:Group A vs. Row 1:Group B	0.3101	0.2592	0.05097	0.03002	37	40	2.402	548
Row 1:Group A vs. Row 1:Group C	0.3101	0.4289	-0.1187	0.0292	37	45	5.75	548
Row 1:Group A vs. Row 2:Group A	0.3101	0.3737	-0.06355	0.0292	37	45	3.077	548
Row 1:Group A vs. Row 2:Group B	0.3101	0.1647	0.1454	0.0292	37	45	7.041	548
Row 1:Group A vs. Row 2:Group C	0.3101	0.3857	-0.07553	0.02906	37	46	3.676	548
Row 1:Group A vs. Row 3:Group A	0.3101	0.3516	-0.04146	0.0292	37	45	2.008	548
Row 1:Group A vs. Row 3:Group B	0.3101	0.1761	0.134	0.0292	37	45	6.489	548
Row 1:Group A vs. Row 3:Group C	0.3101	0.38	-0.06989	0.02854	37	50	3.463	548
Row 1:Group A vs. Row 4:Group A	0.3101	0.4481	-0.1379	0.03652	37	20	5.34	548
Row 1:Group A vs. Row 4:Group B	0.3101	0.1824	0.1277	0.03652	37	20	4.945	548
Row 1:Group A vs. Row 4:Group C	0.3101	0.4075	-0.09736	0.03652	37	20	3.77	548
Row 1:Group A vs. Row 5:Group A	0.3101	0.4775	-0.1674	0.03103	37	35	7.629	548
Row 1:Group A vs. Row 5:Group B	0.3101	0.173	0.1371	0.03103	37	35	6.249	548
Row 1:Group A vs. Row 5:Group C	0.3101	0.4589	-0.1487	0.03103	37	35	6.778	548
Row 1:Group B vs. Row 1:Group C	0.2592	0.4289	-0.1697	0.0286	40	45	8.393	548
Row 1:Group B vs. Row 2:Group A	0.2592	0.3737	-0.1145	0.0286	40	45	5.663	548
Row 1:Group B vs. Row 2:Group B	0.2592	0.1647	0.09443	0.0286	40	45	4.67	548
Row 1:Group B vs. Row 2:Group C	0.2592	0.3857	-0.1265	0.02845	40	46	6.288	548
Row 1:Group B vs. Row 3:Group A	0.2592	0.3516	-0.09244	0.0286	40	45	4.571	548
Row 1:Group B vs. Row 3:Group B	0.2592	0.1761	0.08302	0.0286	40	45	4.106	548
Row 1:Group B vs. Row 3:Group C	0.2592	0.38	-0.1209	0.02792	40	50	6.123	548
Row 1:Group B vs. Row 4:Group A	0.2592	0.4481	-0.1889	0.03604	40	20	7.412	548
Row 1:Group B vs. Row 4:Group B	0.2592	0.1824	0.07673	0.03604	40	20	3.011	548
Row 1:Group B vs. Row 4:Group C	0.2592	0.4075	-0.1483	0.03604	40	20	5.821	548
Row 1:Group B vs. Row 5:Group A	0.2592	0.4775	-0.2184	0.03046	40	35	10.14	548
Row 1:Group B vs. Row 5:Group B	0.2592	0.173	0.08615	0.03046	40	35	4	548
Row 1:Group B vs. Row 5:Group C	0.2592	0.4589	-0.1997	0.03046	40	35	9.272	548
Row 1:Group C vs. Row 2:Group A	0.4289	0.3737	0.0552	0.02774	45	45	2.814	548
Row 1:Group C vs. Row 2:Group B	0.4289	0.1647	0.2641	0.02774	45	45	13.47	548
Row 1:Group C vs. Row 2:Group C	0.4289	0.3857	0.04321	0.02759	45	46	2.215	548
Row 1:Group C vs. Row 3:Group A	0.4289	0.3516	0.07728	0.02774	45	45	3.939	548
Row 1:Group C vs. Row 3:Group B	0.4289	0.1761	0.2527	0.02774	45	45	12.88	548
Row 1:Group C vs. Row 3:Group C	0.4289	0.38	0.04886	0.02704	45	50	2.555	548
Row 1:Group C vs. Row 4:Group A	0.4289	0.4481	-0.01917	0.03537	45	20	0.7666	548
Row 1:Group C vs. Row 4:Group B	0.4289	0.1824	0.2464	0.03537	45	20	9.855	548
Row 1:Group C vs. Row 4:Group C	0.4289	0.4075	0.02138	0.03537	45	20	0.8549	548
Row 1:Group C vs. Row 5:Group A	0.4289	0.4775	-0.04864	0.02966	45	35	2.319	548
Row 1:Group C vs. Row 5:Group B	0.4289	0.173	0.2559	0.02966	45	35	12.2	548
Row 1:Group C vs. Row 5:Group C	0.4289	0.4589	-0.02998	0.02966	45	35	1.429	548
Row 2:Group A vs. Row 2:Group B	0.3737	0.1647	0.209	0.02774	45	45	10.65	548
Row 2:Group A vs. Row 2:Group C	0.3737	0.3857	-0.01198	0.02759	45	46	0.6143	548
Row 2:Group A vs. Row 3:Group A	0.3737	0.3516	0.02208	0.02774	45	45	1.126	548
Row 2:Group A vs. Row 3:Group B	0.3737	0.1761	0.1975	0.02774	45	45	10.07	548
Row 2:Group A vs. Row 3:Group C	0.3737	0.38	-0.006341	0.02704	45	50	0.3316	548
Row 2:Group A vs. Row 4:Group A	0.3737	0.4481	-0.07437	0.03537	45	20	2.974	548
Row 2:Group A vs. Row 4:Group B	0.3737	0.1824	0.1912	0.03537	45	20	7.648	548
Row 2:Group A vs. Row 4:Group C	0.3737	0.4075	-0.03382	0.03537	45	20	1.352	548
Row 2:Group A vs. Row 5:Group A	0.3737	0.4775	-0.1038	0.02966	45	35	4.951	548
Row 2:Group A vs. Row 5:Group B	0.3737	0.173	0.2007	0.02966	45	35	9.568	548
Row 2:Group A vs. Row 5:Group C	0.3737	0.4589	-0.08517	0.02966	45	35	4.061	548
Row 2:Group B vs. Row 2:Group C	0.1647	0.3857	-0.2209	0.02759	45	46	11.32	548
Row 2:Group B vs. Row 3:Group A	0.1647	0.3516	-0.1869	0.02774	45	45	9.526	548
Row 2:Group B vs. Row 3:Group B	0.1647	0.1761	-0.01141	0.02774	45	45	0.5818	548
Row 2:Group B vs. Row 3:Group C	0.1647	0.38	-0.2153	0.02704	45	50	11.26	548
Row 2:Group B vs. Row 4:Group A	0.1647	0.4481	-0.2833	0.03537	45	20	11.33	548
Row 2:Group B vs. Row 4:Group B	0.1647	0.1824	-0.01771	0.03537	45	20	0.7081	548
Row 2:Group B vs. Row 4:Group C	0.1647	0.4075	-0.2428	0.03537	45	20	9.708	548
Row 2:Group B vs. Row 5:Group A	0.1647	0.4775	-0.3128	0.02966	45	35	14.91	548
Row 2:Group B vs. Row 5:Group B	0.1647	0.173	-0.008286	0.02966	45	35	0.3951	548
Row 2:Group B vs. Row 5:Group C	0.1647	0.4589	-0.2941	0.02966	45	35	14.02	548
Row 2:Group C vs. Row 3:Group A	0.3857	0.3516	0.03407	0.02759	46	45	1.746	548
Row 2:Group C vs. Row 3:Group B	0.3857	0.1761	0.2095	0.02759	46	45	10.74	548
Row 2:Group C vs. Row 3:Group C	0.3857	0.38	0.005644	0.02689	46	50	0.2969	548
Row 2:Group C vs. Row 4:Group A	0.3857	0.4481	-0.06238	0.03525	46	20	2.503	548
Row 2:Group C vs. Row 4:Group B	0.3857	0.1824	0.2032	0.03525	46	20	8.154	548
Row 2:Group C vs. Row 4:Group C	0.3857	0.4075	-0.02183	0.03525	46	20	0.876	548
Row 2:Group C vs. Row 5:Group A	0.3857	0.4775	-0.09185	0.02952	46	35	4.401	548
Row 2:Group C vs. Row 5:Group B	0.3857	0.173	0.2127	0.02952	46	35	10.19	548
Row 2:Group C vs. Row 5:Group C	0.3857	0.4589	-0.07319	0.02952	46	35	3.507	548
Row 3:Group A vs. Row 3:Group B	0.3516	0.1761	0.1755	0.02774	45	45	8.944	548
Row 3:Group A vs. Row 3:Group C	0.3516	0.38	-0.02843	0.02704	45	50	1.487	548
Row 3:Group A vs. Row 4:Group A	0.3516	0.4481	-0.09645	0.03537	45	20	3.857	548
Row 3:Group A vs. Row 4:Group B	0.3516	0.1824	0.1692	0.03537	45	20	6.764	548
Row 3:Group A vs. Row 4:Group C	0.3516	0.4075	-0.0559	0.03537	45	20	2.235	548
Row 3:Group A vs. Row 5:Group A	0.3516	0.4775	-0.1259	0.02966	45	35	6.004	548
Row 3:Group A vs. Row 5:Group B	0.3516	0.173	0.1786	0.02966	45	35	8.515	548
Row 3:Group A vs. Row 5:Group C	0.3516	0.4589	-0.1073	0.02966	45	35	5.114	548
Row 3:Group B vs. Row 3:Group C	0.1761	0.38	-0.2039	0.02704	45	50	10.66	548
Row 3:Group B vs. Row 4:Group A	0.1761	0.4481	-0.2719	0.03537	45	20	10.87	548
Row 3:Group B vs. Row 4:Group B	0.1761	0.1824	-0.006293	0.03537	45	20	0.2517	548
Row 3:Group B vs. Row 4:Group C	0.1761	0.4075	-0.2314	0.03537	45	20	9.252	548
Row 3:Group B vs. Row 5:Group A	0.1761	0.4775	-0.3014	0.02966	45	35	14.37	548
Row 3:Group B vs. Row 5:Group B	0.1761	0.173	0.003127	0.02966	45	35	0.1491	548
Row 3:Group B vs. Row 5:Group C	0.1761	0.4589	-0.2827	0.02966	45	35	13.48	548
Row 3:Group C vs. Row 4:Group A	0.38	0.4481	-0.06803	0.03482	50	20	2.763	548
Row 3:Group C vs. Row 4:Group B	0.38	0.1824	0.1976	0.03482	50	20	8.026	548
Row 3:Group C vs. Row 4:Group C	0.38	0.4075	-0.02748	0.03482	50	20	1.116	548
Row 3:Group C vs. Row 5:Group A	0.38	0.4775	-0.09749	0.029	50	35	4.754	548
Row 3:Group C vs. Row 5:Group B	0.38	0.173	0.207	0.029	50	35	10.09	548
Row 3:Group C vs. Row 5:Group C	0.38	0.4589	-0.07883	0.029	50	35	3.844	548
Row 4:Group A vs. Row 4:Group B	0.4481	0.1824	0.2656	0.04161	20	20	9.026	548
Row 4:Group A vs. Row 4:Group C	0.4481	0.4075	0.04055	0.04161	20	20	1.378	548
Row 4:Group A vs. Row 5:Group A	0.4481	0.4775	-0.02947	0.03689	20	35	1.13	548
Row 4:Group A vs. Row 5:Group B	0.4481	0.173	0.275	0.03689	20	35	10.54	548
Row 4:Group A vs. Row 5:Group C	0.4481	0.4589	-0.01081	0.03689	20	35	0.4144	548
Row 4:Group B vs. Row 4:Group C	0.1824	0.4075	-0.2251	0.04161	20	20	7.648	548
Row 4:Group B vs. Row 5:Group A	0.1824	0.4775	-0.2951	0.03689	20	35	11.31	548
Row 4:Group B vs. Row 5:Group B	0.1824	0.173	0.009421	0.03689	20	35	0.3612	548
Row 4:Group B vs. Row 5:Group C	0.1824	0.4589	-0.2764	0.03689	20	35	10.6	548
Row 4:Group C vs. Row 5:Group A	0.4075	0.4775	-0.07002	0.03689	20	35	2.684	548
Row 4:Group C vs. Row 5:Group B	0.4075	0.173	0.2345	0.03689	20	35	8.99	548
Row 4:Group C vs. Row 5:Group C	0.4075	0.4589	-0.05136	0.03689	20	35	1.969	548
Row 5:Group A vs. Row 5:Group B	0.4775	0.173	0.3045	0.03146	35	35	13.69	548
Row 5:Group A vs. Row 5:Group C	0.4775	0.4589	0.01866	0.03146	35	35	0.8389	548
Row 5:Group B vs. Row 5:Group C	0.173	0.4589	-0.2858	0.03146	35	35	12.85	548
