# Supplementary material for: N-myc downstream regulated gene 1 (ndrg1) functions as a molecular switch for cellular adaptation to hypoxia
Source: eLife journal article supplement (doi:10.7554/elife.74031), 2022-09-16
Supplement: fig5-data1 [file Figure 5-Source Data 1.xlsx]

## Sheet: Source Data
	Normoxia, no drug																														Anoxia 12h, no drug
Anterior PD	0.352643	0.372523	0.359828		0.501322	0.471137	0.446343		0.195362	0.200565	0.189269		0.387271	0.387412	0.360498		0.587566	0.595166	0.553407												0.15623	0.145327	0.168592		0.19052	0.210131	0.205113		0.194912	0.225469	0.190469		0.218499	0.24367	0.220086		0.188098	0.19402	0.178977
Posterior PD	0.737502	0.734586	0.721688		0.691278	0.73985	0.696283		0.314085	0.340345	0.355633		0.590302	0.630648	0.61761		0.983713	0.982384	1												0.567021	0.573653	0.563958		0.445194	0.443695	0.447004		0.420057	0.479162	0.488224		0.470293	0.433658	0.433613		0.359884	0.346791	0.377352

## Sheet: ANOVA results
Table Analyzed	FINAL FOR ELIFE RESUB 07272021-1 Nka with Ndrg1a lys or prot inhib or both
Two-way ANOVA	Ordinary
Alpha	0.05
Source of Variation	% of total variation	P value	P value summary	Significant?
Interaction	0.7162	0.4271	ns	No
Row Factor	53.02	<0.0001	****	Yes
Column Factor	18.75	<0.0001	****	Yes
ANOVA table	SS (Type III)	DF	MS	F (DFn, DFd)	P value
Interaction	0.03727	4	0.009318	F (4, 134) = 0.9684	P=0.4271
Row Factor	2.759	1	2.759	F (1, 134) = 286.7	P<0.0001
Column Factor	0.9761	4	0.244	F (4, 134) = 25.36	P<0.0001
Residual	1.289	134	0.009623
Difference between row means
Predicted (LS) mean of Anterior PD	0.2989
Predicted (LS) mean of Posterior PD	0.5834
Difference between predicted means	-0.2845
SE of difference	0.0168
95% CI of difference	-0.3177 to -0.2513
Data summary
Number of columns (Column Factor)	5
Number of rows (Row Factor)	2
Number of values	144

## Sheet: Multiple comparisons
Compare cell means regardless of rows and columns
Number of families	1
Number of comparisons per family	45
Alpha	0.05
Tukey's multiple comparisons test	Predicted (LS) mean diff.	95.00% CI of diff.	Below threshold?	Summary	Adjusted P Value
Anterior PD:Normoxia, no drug vs. Anterior PD:Anoxia 12h, no drug	0.1988	0.08841 to 0.3091	Yes	****	<0.0001
Anterior PD:Normoxia, no drug vs. Anterior PD:Anoxia 12h, mg132	0.1851	0.06983 to 0.3003	Yes	****	<0.0001
Anterior PD:Normoxia, no drug vs. Anterior PD:Anoxia 12h, chloroquine	0.08233	-0.03293 to 0.1976	No	ns	0.3969
Anterior PD:Normoxia, no drug vs. Anterior PD:Anoxia 12h, mg132+chloroquine	0.02617	-0.1069 to 0.1593	No	ns	0.9998
Anterior PD:Normoxia, no drug vs. Posterior PD:Normoxia, no drug	-0.2784	-0.3936 to -0.1631	Yes	****	<0.0001
Anterior PD:Normoxia, no drug vs. Posterior PD:Anoxia 12h, no drug	-0.04544	-0.1558 to 0.06491	No	ns	0.9461
Anterior PD:Normoxia, no drug vs. Posterior PD:Anoxia 12h, mg132	-0.1527	-0.2680 to -0.03749	Yes	**	0.0015
Anterior PD:Normoxia, no drug vs. Posterior PD:Anoxia 12h, chloroquine	-0.2083	-0.3236 to -0.09306	Yes	****	<0.0001
Anterior PD:Normoxia, no drug vs. Posterior PD:Anoxia 12h, mg132+chloroquine	-0.2452	-0.3783 to -0.1121	Yes	****	<0.0001
Anterior PD:Anoxia 12h, no drug vs. Anterior PD:Anoxia 12h, mg132	-0.01367	-0.1240 to 0.09668	No	ns	>0.9999
Anterior PD:Anoxia 12h, no drug vs. Anterior PD:Anoxia 12h, chloroquine	-0.1164	-0.2268 to -0.006073	Yes	*	0.0298
Anterior PD:Anoxia 12h, no drug vs. Anterior PD:Anoxia 12h, mg132+chloroquine	-0.1726	-0.3014 to -0.04372	Yes	**	0.0013
Anterior PD:Anoxia 12h, no drug vs. Posterior PD:Normoxia, no drug	-0.4771	-0.5875 to -0.3668	Yes	****	<0.0001
Anterior PD:Anoxia 12h, no drug vs. Posterior PD:Anoxia 12h, no drug	-0.2442	-0.3494 to -0.1390	Yes	****	<0.0001
Anterior PD:Anoxia 12h, no drug vs. Posterior PD:Anoxia 12h, mg132	-0.3515	-0.4619 to -0.2412	Yes	****	<0.0001
Anterior PD:Anoxia 12h, no drug vs. Posterior PD:Anoxia 12h, chloroquine	-0.4071	-0.5174 to -0.2967	Yes	****	<0.0001
Anterior PD:Anoxia 12h, no drug vs. Posterior PD:Anoxia 12h, mg132+chloroquine	-0.444	-0.5728 to -0.3151	Yes	****	<0.0001
Anterior PD:Anoxia 12h, mg132 vs. Anterior PD:Anoxia 12h, chloroquine	-0.1028	-0.2180 to 0.01250	No	ns	0.1251
Anterior PD:Anoxia 12h, mg132 vs. Anterior PD:Anoxia 12h, mg132+chloroquine	-0.1589	-0.2920 to -0.02583	Yes	**	0.007
Anterior PD:Anoxia 12h, mg132 vs. Posterior PD:Normoxia, no drug	-0.4635	-0.5787 to -0.3482	Yes	****	<0.0001
Anterior PD:Anoxia 12h, mg132 vs. Posterior PD:Anoxia 12h, no drug	-0.2305	-0.3409 to -0.1202	Yes	****	<0.0001
Anterior PD:Anoxia 12h, mg132 vs. Posterior PD:Anoxia 12h, mg132	-0.3378	-0.4531 to -0.2226	Yes	****	<0.0001
Anterior PD:Anoxia 12h, mg132 vs. Posterior PD:Anoxia 12h, chloroquine	-0.3934	-0.5087 to -0.2782	Yes	****	<0.0001
Anterior PD:Anoxia 12h, mg132 vs. Posterior PD:Anoxia 12h, mg132+chloroquine	-0.4303	-0.5634 to -0.2972	Yes	****	<0.0001
Anterior PD:Anoxia 12h, chloroquine vs. Anterior PD:Anoxia 12h, mg132+chloroquine	-0.05616	-0.1892 to 0.07693	No	ns	0.9376
Anterior PD:Anoxia 12h, chloroquine vs. Posterior PD:Normoxia, no drug	-0.3607	-0.4760 to -0.2454	Yes	****	<0.0001
Anterior PD:Anoxia 12h, chloroquine vs. Posterior PD:Anoxia 12h, no drug	-0.1278	-0.2381 to -0.01742	Yes	*	0.0104
Anterior PD:Anoxia 12h, chloroquine vs. Posterior PD:Anoxia 12h, mg132	-0.2351	-0.3503 to -0.1198	Yes	****	<0.0001
Anterior PD:Anoxia 12h, chloroquine vs. Posterior PD:Anoxia 12h, chloroquine	-0.2907	-0.4059 to -0.1754	Yes	****	<0.0001
Anterior PD:Anoxia 12h, chloroquine vs. Posterior PD:Anoxia 12h, mg132+chloroquine	-0.3276	-0.4606 to -0.1945	Yes	****	<0.0001
Anterior PD:Anoxia 12h, mg132+chloroquine vs. Posterior PD:Normoxia, no drug	-0.3045	-0.4376 to -0.1715	Yes	****	<0.0001
Anterior PD:Anoxia 12h, mg132+chloroquine vs. Posterior PD:Anoxia 12h, no drug	-0.07162	-0.2005 to 0.05725	No	ns	0.7414
Anterior PD:Anoxia 12h, mg132+chloroquine vs. Posterior PD:Anoxia 12h, mg132	-0.1789	-0.3120 to -0.04583	Yes	**	0.0012
Anterior PD:Anoxia 12h, mg132+chloroquine vs. Posterior PD:Anoxia 12h, chloroquine	-0.2345	-0.3676 to -0.1014	Yes	****	<0.0001
Anterior PD:Anoxia 12h, mg132+chloroquine vs. Posterior PD:Anoxia 12h, mg132+chloroquine	-0.2714	-0.4202 to -0.1226	Yes	****	<0.0001
Posterior PD:Normoxia, no drug vs. Posterior PD:Anoxia 12h, no drug	0.2329	0.1226 to 0.3433	Yes	****	<0.0001
Posterior PD:Normoxia, no drug vs. Posterior PD:Anoxia 12h, mg132	0.1256	0.01037 to 0.2409	Yes	*	0.0211
Posterior PD:Normoxia, no drug vs. Posterior PD:Anoxia 12h, chloroquine	0.07005	-0.04521 to 0.1853	No	ns	0.6312
Posterior PD:Normoxia, no drug vs. Posterior PD:Anoxia 12h, mg132+chloroquine	0.03315	-0.09994 to 0.1662	No	ns	0.9985
Posterior PD:Anoxia 12h, no drug vs. Posterior PD:Anoxia 12h, mg132	-0.1073	-0.2177 to 0.003050	No	ns	0.064
Posterior PD:Anoxia 12h, no drug vs. Posterior PD:Anoxia 12h, chloroquine	-0.1629	-0.2732 to -0.05253	Yes	***	0.0002
Posterior PD:Anoxia 12h, no drug vs. Posterior PD:Anoxia 12h, mg132+chloroquine	-0.1998	-0.3286 to -0.07092	Yes	****	<0.0001
Posterior PD:Anoxia 12h, mg132 vs. Posterior PD:Anoxia 12h, chloroquine	-0.05558	-0.1708 to 0.05968	No	ns	0.8684
Posterior PD:Anoxia 12h, mg132 vs. Posterior PD:Anoxia 12h, mg132+chloroquine	-0.09248	-0.2256 to 0.04061	No	ns	0.4379
Posterior PD:Anoxia 12h, chloroquine vs. Posterior PD:Anoxia 12h, mg132+chloroquine	-0.0369	-0.1700 to 0.09619	No	ns	0.9965
Test details	Predicted (LS) mean 1	Predicted (LS) mean 2	Predicted (LS) mean diff.	SE of diff.	N1	N2	q	DF
Anterior PD:Normoxia, no drug vs. Anterior PD:Anoxia 12h, no drug	0.3974	0.1986	0.1988	0.03429	15	18	8.196	134
Anterior PD:Normoxia, no drug vs. Anterior PD:Anoxia 12h, mg132	0.3974	0.2123	0.1851	0.03582	15	15	7.307	134
Anterior PD:Normoxia, no drug vs. Anterior PD:Anoxia 12h, chloroquine	0.3974	0.315	0.08233	0.03582	15	15	3.251	134
Anterior PD:Normoxia, no drug vs. Anterior PD:Anoxia 12h, mg132+chloroquine	0.3974	0.3712	0.02617	0.04136	15	9	0.8949	134
Anterior PD:Normoxia, no drug vs. Posterior PD:Normoxia, no drug	0.3974	0.6757	-0.2784	0.03582	15	15	10.99	134
Anterior PD:Normoxia, no drug vs. Posterior PD:Anoxia 12h, no drug	0.3974	0.4428	-0.04544	0.03429	15	18	1.874	134
Anterior PD:Normoxia, no drug vs. Posterior PD:Anoxia 12h, mg132	0.3974	0.5501	-0.1527	0.03582	15	15	6.031	134
Anterior PD:Normoxia, no drug vs. Posterior PD:Anoxia 12h, chloroquine	0.3974	0.6057	-0.2083	0.03582	15	15	8.225	134
Anterior PD:Normoxia, no drug vs. Posterior PD:Anoxia 12h, mg132+chloroquine	0.3974	0.6426	-0.2452	0.04136	15	9	8.385	134
Anterior PD:Anoxia 12h, no drug vs. Anterior PD:Anoxia 12h, mg132	0.1986	0.2123	-0.01367	0.03429	18	15	0.5638	134
Anterior PD:Anoxia 12h, no drug vs. Anterior PD:Anoxia 12h, chloroquine	0.1986	0.315	-0.1164	0.03429	18	15	4.801	134
Anterior PD:Anoxia 12h, no drug vs. Anterior PD:Anoxia 12h, mg132+chloroquine	0.1986	0.3712	-0.1726	0.04005	18	9	6.095	134
Anterior PD:Anoxia 12h, no drug vs. Posterior PD:Normoxia, no drug	0.1986	0.6757	-0.4771	0.03429	18	15	19.68	134
Anterior PD:Anoxia 12h, no drug vs. Posterior PD:Anoxia 12h, no drug	0.1986	0.4428	-0.2442	0.0327	18	18	10.56	134
Anterior PD:Anoxia 12h, no drug vs. Posterior PD:Anoxia 12h, mg132	0.1986	0.5501	-0.3515	0.03429	18	15	14.49	134
Anterior PD:Anoxia 12h, no drug vs. Posterior PD:Anoxia 12h, chloroquine	0.1986	0.6057	-0.4071	0.03429	18	15	16.79	134
Anterior PD:Anoxia 12h, no drug vs. Posterior PD:Anoxia 12h, mg132+chloroquine	0.1986	0.6426	-0.444	0.04005	18	9	15.68	134
Anterior PD:Anoxia 12h, mg132 vs. Anterior PD:Anoxia 12h, chloroquine	0.2123	0.315	-0.1028	0.03582	15	15	4.057	134
Anterior PD:Anoxia 12h, mg132 vs. Anterior PD:Anoxia 12h, mg132+chloroquine	0.2123	0.3712	-0.1589	0.04136	15	9	5.434	134
Anterior PD:Anoxia 12h, mg132 vs. Posterior PD:Normoxia, no drug	0.2123	0.6757	-0.4635	0.03582	15	15	18.3	134
Anterior PD:Anoxia 12h, mg132 vs. Posterior PD:Anoxia 12h, no drug	0.2123	0.4428	-0.2305	0.03429	15	18	9.506	134
Anterior PD:Anoxia 12h, mg132 vs. Posterior PD:Anoxia 12h, mg132	0.2123	0.5501	-0.3378	0.03582	15	15	13.34	134
Anterior PD:Anoxia 12h, mg132 vs. Posterior PD:Anoxia 12h, chloroquine	0.2123	0.6057	-0.3934	0.03582	15	15	15.53	134
Anterior PD:Anoxia 12h, mg132 vs. Posterior PD:Anoxia 12h, mg132+chloroquine	0.2123	0.6426	-0.4303	0.04136	15	9	14.71	134
Anterior PD:Anoxia 12h, chloroquine vs. Anterior PD:Anoxia 12h, mg132+chloroquine	0.315	0.3712	-0.05616	0.04136	15	9	1.92	134
Anterior PD:Anoxia 12h, chloroquine vs. Posterior PD:Normoxia, no drug	0.315	0.6757	-0.3607	0.03582	15	15	14.24	134
Anterior PD:Anoxia 12h, chloroquine vs. Posterior PD:Anoxia 12h, no drug	0.315	0.4428	-0.1278	0.03429	15	18	5.269	134
Anterior PD:Anoxia 12h, chloroquine vs. Posterior PD:Anoxia 12h, mg132	0.315	0.5501	-0.2351	0.03582	15	15	9.281	134
Anterior PD:Anoxia 12h, chloroquine vs. Posterior PD:Anoxia 12h, chloroquine	0.315	0.6057	-0.2907	0.03582	15	15	11.48	134
Anterior PD:Anoxia 12h, chloroquine vs. Posterior PD:Anoxia 12h, mg132+chloroquine	0.315	0.6426	-0.3276	0.04136	15	9	11.2	134
Anterior PD:Anoxia 12h, mg132+chloroquine vs. Posterior PD:Normoxia, no drug	0.3712	0.6757	-0.3045	0.04136	9	15	10.41	134
Anterior PD:Anoxia 12h, mg132+chloroquine vs. Posterior PD:Anoxia 12h, no drug	0.3712	0.4428	-0.07162	0.04005	9	18	2.529	134
Anterior PD:Anoxia 12h, mg132+chloroquine vs. Posterior PD:Anoxia 12h, mg132	0.3712	0.5501	-0.1789	0.04136	9	15	6.118	134
Anterior PD:Anoxia 12h, mg132+chloroquine vs. Posterior PD:Anoxia 12h, chloroquine	0.3712	0.6057	-0.2345	0.04136	9	15	8.018	134
Anterior PD:Anoxia 12h, mg132+chloroquine vs. Posterior PD:Anoxia 12h, mg132+chloroquine	0.3712	0.6426	-0.2714	0.04624	9	9	8.3	134
Posterior PD:Normoxia, no drug vs. Posterior PD:Anoxia 12h, no drug	0.6757	0.4428	0.2329	0.03429	15	18	9.605	134
Posterior PD:Normoxia, no drug vs. Posterior PD:Anoxia 12h, mg132	0.6757	0.5501	0.1256	0.03582	15	15	4.96	134
Posterior PD:Normoxia, no drug vs. Posterior PD:Anoxia 12h, chloroquine	0.6757	0.6057	0.07005	0.03582	15	15	2.766	134
Posterior PD:Normoxia, no drug vs. Posterior PD:Anoxia 12h, mg132+chloroquine	0.6757	0.6426	0.03315	0.04136	15	9	1.133	134
Posterior PD:Anoxia 12h, no drug vs. Posterior PD:Anoxia 12h, mg132	0.4428	0.5501	-0.1073	0.03429	18	15	4.425	134
Posterior PD:Anoxia 12h, no drug vs. Posterior PD:Anoxia 12h, chloroquine	0.4428	0.6057	-0.1629	0.03429	18	15	6.717	134
Posterior PD:Anoxia 12h, no drug vs. Posterior PD:Anoxia 12h, mg132+chloroquine	0.4428	0.6426	-0.1998	0.04005	18	9	7.055	134
Posterior PD:Anoxia 12h, mg132 vs. Posterior PD:Anoxia 12h, chloroquine	0.5501	0.6057	-0.05558	0.03582	15	15	2.194	134
Posterior PD:Anoxia 12h, mg132 vs. Posterior PD:Anoxia 12h, mg132+chloroquine	0.5501	0.6426	-0.09248	0.04136	15	9	3.162	134
Posterior PD:Anoxia 12h, chloroquine vs. Posterior PD:Anoxia 12h, mg132+chloroquine	0.6057	0.6426	-0.0369	0.04136	15	9	1.262	134
