# Supplementary material for: N-myc downstream regulated gene 1 (ndrg1) functions as a molecular switch for cellular adaptation to hypoxia
Source: eLife journal article supplement (doi:10.7554/elife.74031), 2022-09-16
Supplement: fig5-data2 [file Figure 5-Source Data 2.xlsx]

## Sheet: Source Data
	Hours in Anoxia (0%)	WT
24 hpf 0h		0.237148	0.232869	0.220832	0.221862	0.217042	0.204737		0.157318	0.150934	0.168518	0.209738	0.196391	0.213695		0.337535	0.328582	0.297172	0.306779	0.273288	0.246102																0.28253	0.265118	0.239907	0.259535	0.239838	0.23273
27 hpf 0h																								0.282273	0.275016	0.274523	0.246676	0.261121	0.265353	0.192559	0.203575	0.202608	0.21331	0.209577	0.226504
6h		0.30007	0.302808	0.282899	0.270222	0.270222	0.254585		0.315462	0.326981	0.335455	0.317225	0.332455	0.334828		0.432365	0.442662	0.374704	0.443937	0.45704	0.403401			0.608935	0.584834	0.587627	0.627403	0.621177	0.631635								0.518744	0.488951	0.426308	0.530594	0.522039	0.424207
12h		0.228534	0.228476	0.215242	0.212888	0.211007	0.19106		0.258211	0.250472	0.249737	0.260364	0.25453	0.245338		0.344274	0.356123	0.289168	0.372187	0.384004	0.3111			0.391605	0.392697	0.371022	0.406283	0.40554	0.393832								0.339827	0.346231	0.279847	0.348242	0.337318	0.30075

## Sheet: ANOVA results
Table Analyzed	Final eLife fig T1 T3 T5 - what was initially submitted to eLIFE + dev controls
Two-way ANOVA	Ordinary
Alpha	0.05
Source of Variation	% of total variation	P value	P value summary	Significant?
Interaction	0.7009	0.5034	ns	No
Row Factor	44.13	<0.0001	****	Yes
Column Factor	0.2232	0.3874	ns	No
ANOVA table	SS (Type III)	DF	MS	F (DFn, DFd)	P value
Interaction	0.02083	3	0.006943	F (3, 184) = 0.7856	P=0.5034
Row Factor	1.312	3	0.4372	F (3, 184) = 49.47	P<0.0001
Column Factor	0.006634	1	0.006634	F (1, 184) = 0.7506	P=0.3874
Residual	1.626	184	0.008838
Difference between column means
Predicted (LS) mean of WT	0.3021
Predicted (LS) mean of ndrg1a -/-	0.2895
Difference between predicted means	0.01261
SE of difference	0.01455
95% CI of difference	-0.01610 to 0.04132
Data summary
Number of columns (Column Factor)	2
Number of rows (Row Factor)	4
Number of values	192

## Sheet: Multiple comparisons
Compare cell means regardless of rows and columns
Number of families	1
Number of comparisons per family	28
Alpha	0.05
Tukey's multiple comparisons test	Predicted (LS) mean diff.	95.00% CI of diff.	Below threshold?	Summary	Adjusted P Value
24 hpf 0h:WT vs. 24 hpf 0h:ndrg1a -/-	0.02996	-0.05325 to 0.1132	No	ns	0.9553
24 hpf 0h:WT vs. 27 hpf 0h:WT	0.001417	-0.1005 to 0.1033	No	ns	>0.9999
24 hpf 0h:WT vs. 27 hpf 0h:ndrg1a -/-	-0.01318	-0.1151 to 0.08873	No	ns	>0.9999
24 hpf 0h:WT vs. 6h:WT	-0.1865	-0.2654 to -0.1075	Yes	****	<0.0001
24 hpf 0h:WT vs. 6h:ndrg1a -/-	-0.1896	-0.2686 to -0.1107	Yes	****	<0.0001
24 hpf 0h:WT vs. 12h:WT	-0.06669	-0.1456 to 0.01225	No	ns	0.1662
24 hpf 0h:WT vs. 12h:ndrg1a -/-	-0.02848	-0.1074 to 0.05046	No	ns	0.9548
24 hpf 0h:ndrg1a -/- vs. 27 hpf 0h:WT	-0.02854	-0.1305 to 0.07337	No	ns	0.9892
24 hpf 0h:ndrg1a -/- vs. 27 hpf 0h:ndrg1a -/-	-0.04314	-0.1451 to 0.05877	No	ns	0.8986
24 hpf 0h:ndrg1a -/- vs. 6h:WT	-0.2164	-0.2954 to -0.1375	Yes	****	<0.0001
24 hpf 0h:ndrg1a -/- vs. 6h:ndrg1a -/-	-0.2196	-0.2985 to -0.1406	Yes	****	<0.0001
24 hpf 0h:ndrg1a -/- vs. 12h:WT	-0.09665	-0.1756 to -0.01771	Yes	**	0.0056
24 hpf 0h:ndrg1a -/- vs. 12h:ndrg1a -/-	-0.05844	-0.1374 to 0.02050	No	ns	0.3159
27 hpf 0h:WT vs. 27 hpf 0h:ndrg1a -/-	-0.0146	-0.1323 to 0.1031	No	ns	>0.9999
27 hpf 0h:WT vs. 6h:WT	-0.1879	-0.2864 to -0.08945	Yes	****	<0.0001
27 hpf 0h:WT vs. 6h:ndrg1a -/-	-0.191	-0.2895 to -0.09258	Yes	****	<0.0001
27 hpf 0h:WT vs. 12h:WT	-0.06811	-0.1666 to 0.03035	No	ns	0.4055
27 hpf 0h:WT vs. 12h:ndrg1a -/-	-0.0299	-0.1284 to 0.06856	No	ns	0.9826
27 hpf 0h:ndrg1a -/- vs. 6h:WT	-0.1733	-0.2718 to -0.07484	Yes	****	<0.0001
27 hpf 0h:ndrg1a -/- vs. 6h:ndrg1a -/-	-0.1764	-0.2749 to -0.07798	Yes	****	<0.0001
27 hpf 0h:ndrg1a -/- vs. 12h:WT	-0.05351	-0.1520 to 0.04495	No	ns	0.7089
27 hpf 0h:ndrg1a -/- vs. 12h:ndrg1a -/-	-0.0153	-0.1138 to 0.08316	No	ns	0.9997
6h:WT vs. 6h:ndrg1a -/-	-0.003138	-0.07756 to 0.07129	No	ns	>0.9999
6h:WT vs. 12h:WT	0.1198	0.04537 to 0.1942	Yes	****	<0.0001
6h:WT vs. 12h:ndrg1a -/-	0.158	0.08358 to 0.2324	Yes	****	<0.0001
6h:ndrg1a -/- vs. 12h:WT	0.1229	0.04851 to 0.1974	Yes	****	<0.0001
6h:ndrg1a -/- vs. 12h:ndrg1a -/-	0.1611	0.08671 to 0.2356	Yes	****	<0.0001
12h:WT vs. 12h:ndrg1a -/-	0.03821	-0.03622 to 0.1126	No	ns	0.7652
Test details	Predicted (LS) mean 1	Predicted (LS) mean 2	Predicted (LS) mean diff.	SE of diff.	N1	N2	q	DF
24 hpf 0h:WT vs. 24 hpf 0h:ndrg1a -/-	0.2392	0.2092	0.02996	0.02714	24	24	1.561	184
24 hpf 0h:WT vs. 27 hpf 0h:WT	0.2392	0.2378	0.001417	0.03324	24	12	0.0603	184
24 hpf 0h:WT vs. 27 hpf 0h:ndrg1a -/-	0.2392	0.2524	-0.01318	0.03324	24	12	0.5609	184
24 hpf 0h:WT vs. 6h:WT	0.2392	0.4257	-0.1865	0.02575	24	30	10.24	184
24 hpf 0h:WT vs. 6h:ndrg1a -/-	0.2392	0.4288	-0.1896	0.02575	24	30	10.42	184
24 hpf 0h:WT vs. 12h:WT	0.2392	0.3059	-0.06669	0.02575	24	30	3.663	184
24 hpf 0h:WT vs. 12h:ndrg1a -/-	0.2392	0.2677	-0.02848	0.02575	24	30	1.565	184
24 hpf 0h:ndrg1a -/- vs. 27 hpf 0h:WT	0.2092	0.2378	-0.02854	0.03324	24	12	1.215	184
24 hpf 0h:ndrg1a -/- vs. 27 hpf 0h:ndrg1a -/-	0.2092	0.2524	-0.04314	0.03324	24	12	1.836	184
24 hpf 0h:ndrg1a -/- vs. 6h:WT	0.2092	0.4257	-0.2164	0.02575	24	30	11.89	184
24 hpf 0h:ndrg1a -/- vs. 6h:ndrg1a -/-	0.2092	0.4288	-0.2196	0.02575	24	30	12.06	184
24 hpf 0h:ndrg1a -/- vs. 12h:WT	0.2092	0.3059	-0.09665	0.02575	24	30	5.309	184
24 hpf 0h:ndrg1a -/- vs. 12h:ndrg1a -/-	0.2092	0.2677	-0.05844	0.02575	24	30	3.21	184
27 hpf 0h:WT vs. 27 hpf 0h:ndrg1a -/-	0.2378	0.2524	-0.0146	0.03838	12	12	0.538	184
27 hpf 0h:WT vs. 6h:WT	0.2378	0.4257	-0.1879	0.03211	12	30	8.276	184
27 hpf 0h:WT vs. 6h:ndrg1a -/-	0.2378	0.4288	-0.191	0.03211	12	30	8.414	184
27 hpf 0h:WT vs. 12h:WT	0.2378	0.3059	-0.06811	0.03211	12	30	2.999	184
27 hpf 0h:WT vs. 12h:ndrg1a -/-	0.2378	0.2677	-0.0299	0.03211	12	30	1.317	184
27 hpf 0h:ndrg1a -/- vs. 6h:WT	0.2524	0.4257	-0.1733	0.03211	12	30	7.632	184
27 hpf 0h:ndrg1a -/- vs. 6h:ndrg1a -/-	0.2524	0.4288	-0.1764	0.03211	12	30	7.771	184
27 hpf 0h:ndrg1a -/- vs. 12h:WT	0.2524	0.3059	-0.05351	0.03211	12	30	2.356	184
27 hpf 0h:ndrg1a -/- vs. 12h:ndrg1a -/-	0.2524	0.2677	-0.0153	0.03211	12	30	0.6738	184
6h:WT vs. 6h:ndrg1a -/-	0.4257	0.4288	-0.003138	0.02427	30	30	0.1828	184
6h:WT vs. 12h:WT	0.4257	0.3059	0.1198	0.02427	30	30	6.98	184
6h:WT vs. 12h:ndrg1a -/-	0.4257	0.2677	0.158	0.02427	30	30	9.205	184
6h:ndrg1a -/- vs. 12h:WT	0.4288	0.3059	0.1229	0.02427	30	30	7.162	184
6h:ndrg1a -/- vs. 12h:ndrg1a -/-	0.4288	0.2677	0.1611	0.02427	30	30	9.388	184
12h:WT vs. 12h:ndrg1a -/-	0.3059	0.2677	0.03821	0.02427	30	30	2.226	184
