# Supplementary material for: N-myc downstream regulated gene 1 (ndrg1) functions as a molecular switch for cellular adaptation to hypoxia
Source: eLife journal article supplement (doi:10.7554/elife.74031), 2022-09-16
Supplement: fig5-data3 [file Figure 5-Source Data 3.xlsx]

## Sheet: Source Data
-Ouabain	+Ouabain
0.228534
0.228476
0.215242
0.212888
0.211007
0.19106
0.258211
0.250472
0.249737
0.260364
0.25453
0.245338
0.344274
0.356123
0.289168
0.372187
0.384004
0.3111
0.391605	0.497421
0.392697	0.498536
0.371022	0.47692
0.406283	0.53464
0.40554	0.527363
0.393832	0.532731
0.339827	0.451829
0.346231	0.42555
0.279847	0.386429
0.348242	0.477317
0.337318	0.458273
0.30075	0.411938

## Sheet: Unpaired t test
Table Analyzed	WT 24hpf 12h anoxia ouabain analysis
Column B	+Ouabain
vs.	vs.
Column A	-Ouabain
Unpaired t test
P value	<0.0001
P value summary	****
Significantly different (P < 0.05)?	Yes
One- or two-tailed P value?	Two-tailed
t, df	t=7.710, df=40
How big is the difference?
Mean of column A	0.3059
Mean of column B	0.4732
Difference between means (B - A) ± SEM	0.1674 ± 0.02171
95% confidence interval	0.1235 to 0.2113
R squared (eta squared)	0.5978
F test to compare variances
F, DFn, Dfd	2.001, 29, 11
P value	0.2244
P value summary	ns
Significantly different (P < 0.05)?	No
Data analyzed
Sample size, column A	30
Sample size, column B	12
