# Supplementary material for: N-myc downstream regulated gene 1 (ndrg1) functions as a molecular switch for cellular adaptation to hypoxia
Source: eLife journal article supplement (doi:10.7554/elife.74031), 2022-09-16
Supplement: fig5-figsupp1-data1 [file Figure 5-figure supplement 1-Source Data 1.xlsx]

## Sheet: Source Data Normoxia
Seconds	WT	ndrg1a -/-
5	-0.00213	-0.00279
6	-0.00214	-0.00359
7	-0.00137	-0.00258
8	-0.00075	-0.00211
9	-0.00076	-0.00162
10	-0.00032	-0.00082
11	1e-05	-9e-05
12	-0.00096	-9e-05
13	-0.00129	-0.00069
14	-0.00127	0.00039
15	-0.00213	-0.00061
16	-0.00244	-1e-05
17	-0.00291	0.0007
18	-0.00317	0.00119
19	-0.00345	0.00029
20	-0.003	2e-05
21	-0.00339	-0.00023
22	-0.00311	-0.00046
23	-0.00256	-0.00021
24	-0.00154	0.00059
25	-0.00111	0.00025
26	-0.00054	0
27	0.00035	-0.0005
28	0.00066	-0.00111
29	0.00066	-0.00225
30	0.00076	-0.00213
31	0.00137	-0.00178
32	0.00082	-0.00108
33	-0.00013	-0.0017
34	-0.00092	-0.00101
35	-0.00096	-0.00028
36	-0.00184	-0.0004
37	-0.00162	-0.00048
38	-0.00054	0.00084
39	-9e-05	0.00125
40	0.00011	0.00129
41	0.00045	0.00134
42	0.00087	0.00029
43	0.00046	-2e-05
44	0.00062	0.00071
45	-9e-05	0.00129
46	0.00042	0.0011
47	-0.0002	0.00131
48	-0.00014	0.0005
49	-0.00047	-0.00081
50	0.00093	-0.00097
51	0.00033	-0.00072
52	0.00016	-0.00094
53	0.00019	6e-05
54	0.00077	0.00055
55	3e-05	1e-05
56	-0.00022	-0.0002
57	-2e-05	5e-05
58	-0.00019	-0.0001
59	-0.00036	-0.00075
60	-0.00126	-0.00013
61	-0.0009	-0.00078
62	-0.00036	-0.00174
63	0.00013	-0.00245
64	-0.00026	-0.0021
65	-0.00019	-0.00263
66	-0.0001	-0.00152
67	-0.00037	-0.00027
68	-0.0008	0.00078
69	-0.00073	0.00084
70	-0.00059	0.00114
71	-0.00068	0.00098
72	-0.0009	0.00154
73	-0.00179	0.00125
74	-0.0033	0.00207
75	-0.00305	0.00194
76	-0.00335	0.00217
77	-0.0035	0.00179
78	-0.00255	0.00181
79	-0.00134	0.00153
80	-0.00137	0.00237
81	-0.00088	0.00203
82	-0.00044	0.00132
83	-8e-05	0.00044
84	3e-05	-0.00088
85	-0.00042	-0.0022
86	-0.00092	-0.00259
87	-0.00114	-0.00208
88	-0.0013	-0.00178
89	-0.00052	-0.00144
90	-6e-05	-0.00054
91	0.00044	-0.00034
92	-0.00013	0
93	-3e-05	3e-05
94	-0.00062	0.00055
95	-0.00103	-3e-05
96	-0.00049	-0.00076
97	-0.00028	-0.00144
98	-0.00164	-0.00105
99	-0.00285	-0.00102
100	-0.0022	-9e-05
101	-0.00282	0.00036
102	-0.00244	0.00095
103	-0.00131	0.00037
104	-0.00023	0.00038
105	-0.00014	-0.00015
106	0.00028	0.00014
107	0.00066	-6e-05
108	0.00057	0.0007
109	-0.00021	0.00063
110	-0.00077	0.0004
111	-0.0014	0.00075
112	-0.0013	0.00082
113	-0.00025	0.00142
114	0.00121	0.00157
115	0.00213	0.00184
116	0.0034	0.00158
117	0.00353	0.00147
118	0.0031	0.00033
119	0.00315	0.00066
120	0.00303	0.0012
121	0.0022	0.00083
122	0.00245	0.00092
123	0.00307	0.00095
124	0.00307	0.00058
125	0.00346	0.00015
126	0.00233	-0.00011
127	0.0014	-0.00047
128	-9e-05	-0.00038
129	-0.00054	-0.00038
130	-0.00149	-0.00056
131	-0.00046	-2e-05
132	-0.00036	0.00072
133	0.00018	0.00058
134	0.00054	0.00052
135	0.00054	0.00102
136	0.00141	0.0019
137	0.00184	0.00205
138	0.00217	0.00233
139	0.00149	0.00314
140	0.00186	0.00383
141	0.00103	0.00445
142	0.00105	0.00444
143	0.00022	0.00458
144	0.00068	0.0044
145	0.00069	0.00308
146	0.00074	0.00163
147	0.0003	0.00089
148	0.00025	0.00062
149	0.00027	0.00048
150	-0.00035	0.00082
151	-0.0002	0.00074
152	-0.00072	0.00012
153	-0.00079	0.00023
154	-0.00152	0.00058
155	-0.00143	0.00083
156	-0.0015	0.00097
157	-0.00029	0.00226
158	0.00025	0.00334
159	0.00054	0.00363
160	0.00032	0.00375
161	0	0.0043
162	-0.00091	0.00414
163	-0.00146	0.00313
164	-0.00157	0.00164
165	-0.00125	0.00124
166	-0.00064	0.00141
167	-0.00037	0.00147
168	0.00029	0.00173
169	0.00093	0.00261
170	0.0011	0.00383
171	0.00043	0.00376
172	-9e-05	0.00391
173	-0.00057	0.00387
174	-0.00028	0.00342
175	-0.00066	0.0024
176	-0.00038	0.0017
177	0.00054	0.00059
178	0.00048	-0.00031
179	-0.00045	-0.00065
180	0.00094	-0.00104
181	0.00126	-0.00151
182	0.00096	-0.00067
183	0.00077	0.00131
184	0.00192	0.00184
185	0.00135	0.00242
186	0.00178	0.00324
187	0.00221	0.00295
188	0.00276	0.00173
189	0.00214	0.00186
190	0.00207	0.00192
191	0.00215	0.00192
192	0.00203	0.00283
193	0.0019	0.00351
194	0.00171	0.00364
195	0.00108	0.00346
196	-6e-05	0.00325
197	-0.00029	0.00224
198	-0.00025	0.00132
199	-0.0004	0.0007
200	-0.00019	0.00066
201	0.00025	0.00041
202	0.00049	0.00045
203	0.00051	0.00081
204	0.00055	0.00088
205	0.00072	0.00103
206	0.0009	0.00173
207	0.00097	0.00218
208	0.00168	0.00255
209	0.00223	0.00288
210	0.00295	0.00281
211	0.00299	0.00258
212	0.00258	0.00281
213	0.00225	0.00254
214	0.00234	0.0034
215	0.00215	0.00345
216	0.00152	0.00334
217	0.00159	0.00355
218	0.00124	0.00406
219	0.00109	0.00345
220	0.00072	0.00386
221	0.00136	0.00333
222	0.00059	0.00312
223	0.00137	0.00245
224	0.00148	0.00284
225	0.00106	0.00153
226	0.00072	0.002
227	0.00243	0.00165
228	0.00207	0.0011
229	0.00275	-8e-05
230	0.0034	0.0003
231	0.00378	0.00032
232	0.00315	0.00059
233	0.00288	0.00154
234	0.00182	0.00213
235	0.00135	0.00278
236	0.00189	0.00226
237	0.00142	0.00199
238	0.00182	0.00209
239	0.00119	0.00242
240	0.00101	0.00226
241	5e-05	0.00257
242	-0.00021	0.00169
243	-0.0015	0.00113
244	-0.00076	0.00121
245	-0.00084	0.0013
246	-0.00122	-0.06466
247	-0.00145	-0.13704
248	-0.00062	-0.17328
249	-3e-05	-0.19411
250	0.00025	-0.20115
251	-0.00012	-0.15163
252	0.00082	-0.09856
253	0.00134	-0.07644
254	0.00153	-0.06625
255	0.00188	-0.0649
256	0.00287	-0.05013
257	0.00284	-0.02813
258	-0.08519	-0.01019
259	-0.20983	0.0042
260	-0.27316	0.01555
261	-0.30707	0.02388
262	-0.32537	0.0279
263	-0.24323	0.02999
264	-0.11932	0.02989
265	-0.05341	0.02733
266	-0.01576	0.02331
267	0.00904	0.02043
268	0.02679	0.0169
269	0.04012	0.01449
270	0.05219	0.01323
271	0.06394	0.01411
272	0.07214	0.01616
273	0.07201	0.02028
274	0.06689	0.02738
275	0.05497	0.03876
276	0.03851	0.05123
277	0.01933	0.06455
278	-0.00146	0.07958
279	-0.02193	0.09373
280	-0.04008	0.10755
281	-0.05596	0.12146
282	-0.06929	0.13526
283	-0.0772	0.14791
284	-0.07856	0.16104
285	-0.07504	0.17078
286	-0.06722	0.17815
287	-0.05509	0.18329
288	-0.04013	0.18645
289	-0.02626	0.17958
290	-0.01057	0.17616
291	0.00461	0.18362
292	0.01906	0.18457
293	0.03182	0.18856
294	0.04515	0.22311
295	0.05833	0.25497
296	0.08834	0.2603
297	0.14609	0.24029
298	0.23262	0.19176
299	0.30472	0.10419
300	0.34245	0.02528
301	0.3498	-0.05098
302	0.30697	-0.12425
303	0.21957	-0.21132
304	0.13425	-0.31438
305	0.05127	-0.46412
306	-0.05184	-0.64859
307	-0.16983	-0.86823
308	-0.32189	-1.10144
309	-0.51668	-1.3343
310	-0.73747	-1.56269
311	-0.97889	-1.77817
312	-1.23452	-1.96248
313	-1.48618	-2.12242
314	-1.7251	-2.27522
315	-1.94318	-2.41642
316	-2.14028	-2.53896
317	-2.31204	-2.63945
318	-2.45576	-2.71926
319	-2.56955	-2.78096
320	-2.65456	-2.82545
321	-2.70546	-2.85366
322	-2.72945	-2.86642
323	-2.73311	-2.86612
324	-2.71688	-2.85288
325	-2.68524	-2.82839
326	-2.64452	-2.79756
327	-2.5951	-2.76635
328	-2.53864	-2.73603
329	-2.48428	-2.71073
330	-2.43067	-2.68947
331	-2.37821	-2.66812
332	-2.32429	-2.6366
333	-2.26718	-2.59549
334	-2.20691	-2.5431
335	-2.14387	-2.48516
336	-2.07645	-2.42553
337	-2.0119	-2.36822
338	-1.95883	-2.31411
339	-1.91662	-2.26569
340	-1.88517	-2.22453
341	-1.86744	-2.19321
342	-1.8593	-2.17843
343	-1.76483	-2.15534
344	-1.70164	-2.079
345	-1.67776	-2.05617
346	-1.68	-2.06103
347	-1.69852	-2.07942
348	-1.82106	-2.12895
349	-1.92486	-2.24906
350	-2.00159	-2.32591
351	-2.06041	-2.37875
352	-2.11224	-2.41984
353	-2.15658	-2.45532
354	-2.1919	-2.48259
355	-2.2152	-2.50266
356	-2.22837	-2.51789
357	-2.23049	-2.52575
358	-2.22529	-2.52696
359	-2.21709	-2.52642
360	-2.20825	-2.52189
361	-2.20067	-2.5127
362	-2.19253	-2.50311
363	-2.18325	-2.49075
364	-2.17526	-2.47449
365	-2.16766	-2.45832
366	-2.16208	-2.44203
367	-2.158	-2.42657
368	-2.15479	-2.41234
369	-2.14991	-2.39915
370	-2.14543	-2.38645
371	-2.13935	-2.37597
372	-2.13333	-2.36731
373	-2.12467	-2.3606
374	-2.11245	-2.35606
375	-2.09812	-2.35269
376	-2.08601	-2.35036
377	-2.07953	-2.34424
378	-2.08041	-2.33491
379	-2.08522	-2.32579
380	-2.08984	-2.31661
381	-2.09035	-2.30777
382	-2.08577	-2.30188
383	-2.07549	-2.29528
384	-2.06289	-2.28727
385	-2.05307	-2.2819
386	-2.04708	-2.27675
387	-2.0463	-2.27232
388	-2.05277	-2.26986
389	-2.06496	-2.26883
390	-2.08092	-2.26859
391	-2.09732	-2.27045
392	-2.11078	-2.27193
393	-2.11575	-2.27648
394	-2.11496	-2.28063
395	-2.11076	-2.28289
396	-2.10848	-2.28177
397	-2.10579	-2.27939
398	-2.10438	-2.27573
399	-2.10102	-2.26948
400	-2.09563	-2.25991
401	-2.0894	-2.24603
402	-2.08353	-2.23119
403	-2.07935	-2.21523
404	-2.08186	-2.20505
405	-2.08783	-2.20424
406	-2.09206	-2.21456
407	-2.09489	-2.22913
408	-2.09515	-2.24393
409	-2.09038	-2.25519
410	-2.08636	-2.26233
411	-2.0842	-2.26231
412	-2.08357	-2.25922
413	-2.0861	-2.25701
414	-2.09173	-2.2551
415	-2.09471	-2.25049
416	-2.09549	-2.24826
417	-2.09426	-2.24505
418	-2.08963	-2.23746
419	-2.0828	-2.22479
420	-2.07688	-2.20574
421	-2.07355	-2.18098
422	-2.07126	-2.157
423	-2.0732	-2.13832
424	-2.0799	-2.12509
425	-2.0847	-2.11966
426	-2.08471	-2.12314
427	-2.08517	-2.12667
428	-2.08488	-2.12496
429	-2.08183	-2.12139
430	-2.07846	-2.11612
431	-2.08146	-2.10664
432	-2.08823	-2.09955
433	-2.09817	-2.09607
434	-2.10841	-2.09623
435	-2.12126	-2.09881
436	-2.12701	-2.10123
437	-2.12255	-2.10241
438	-2.11088	-2.10218
439	-2.09942	-2.09939
440	-2.09036	-2.09388
441	-2.08521	-2.08483
442	-2.08101	-2.07409
443	-2.07737	-2.06278
444	-2.07388	-2.04897
445	-2.06749	-2.03599
446	-2.06301	-2.02366
447	-2.0631	-2.00992
448	-2.06411	-1.99805
449	-2.06101	-1.98972
450	-2.05738	-1.98226
451	-2.05069	-1.98013
452	-2.04308	-1.9827
453	-2.03442	-1.98527
454	-2.02802	-1.98805
455	-2.02149	-1.99173
456	-2.01935	-1.99611
457	-2.02113	-1.99812
458	-2.02831	-1.99814
459	-2.03491	-1.99354
460	-2.03938	-1.98724
461	-2.03846	-1.97708
462	-2.03648	-1.96519
463	-2.03591	-1.95272
464	-2.0407	-1.94018
465	-2.04801	-1.92503
466	-2.05624	-1.9089
467	-2.06227	-1.89306
468	-2.06525	-1.88063
469	-2.06423	-1.87079
470	-2.06168	-1.86378
471	-2.05916	-1.85989
472	-2.05687	-1.8618
473	-2.05325	-1.86477
474	-2.05035	-1.87111
475	-2.04736	-1.88008
476	-2.04176	-1.88828
477	-2.03528	-1.89404
478	-2.02615	-1.89722
479	-2.01644	-1.89715
480	-2.01064	-1.89606
481	-2.00813	-1.89575
482	-2.01131	-1.89924
483	-2.01954	-1.90395
484	-2.02206	-1.90852
485	-2.02049	-1.90829
486	-2.01782	-1.90322
487	-2.00943	-1.89107
488	-1.99901	-1.87686
489	-1.9958	-1.86246
490	-1.99429	-1.84917
491	-1.99091	-1.83742
492	-1.99468	-1.82954
493	-2.00162	-1.82579
494	-2.00316	-1.82236
495	-2.00448	-1.82026
496	-2.00971	-1.82124
497	-2.00604	-1.81967
498	-2.001	-1.81568
499	-1.99916	-1.81196
500	-1.99593	-1.80883
501	-1.99168	-1.80535
502	-1.99596	-1.80004
503	-2.0015	-1.79591
504	-2.00528	-1.79303
505	-2.01073	-1.79042
506	-2.01384	-1.78787
507	-2.00908	-1.78873
508	-2.00327	-1.79011
509	-1.99873	-1.78988
510	-1.9912	-1.789
511	-1.98551	-1.7845
512	-1.98398	-1.77706
513	-1.98078	-1.76775
514	-1.97709	-1.7602
515	-1.97728	-1.75571
516	-1.98069	-1.75574
517	-1.98495	-1.75805
518	-1.98978	-1.76107
519	-1.99503	-1.76442
520	-1.99681	-1.76638
521	-1.99604	-1.76786
522	-1.98882	-1.7687
523	-1.97869	-1.76833
524	-1.97133	-1.76672
525	-1.96917	-1.76369
526	-1.96647	-1.75687
527	-1.96514	-1.7531
528	-1.96607	-1.75057
529	-1.96177	-1.74574
530	-1.95661	-1.74147
531	-1.95224	-1.73877
532	-1.95063	-1.73187
533	-1.94721	-1.72246
534	-1.94677	-1.71519
535	-1.94472	-1.70879
536	-1.94498	-1.70322
537	-1.946	-1.69848
538	-1.95178	-1.69848
539	-1.95733	-1.70017
540	-1.95883	-1.70236
541	-1.95572	-1.70715
542	-1.95457	-1.71798
543	-1.94992	-1.72924
544	-1.94528	-1.74105
545	-1.943	-1.75069
546	-1.943	-1.75607
547	-1.93576	-1.75575
548	-1.92646	-1.75121
549	-1.91668	-1.74437
550	-1.90804	-1.73708
551	-1.89654	-1.73325
552	-1.88841	-1.72999
553	-1.88097	-1.72965
554	-1.87501	-1.72921
555	-1.86802	-1.72967
556	-1.86062	-1.72788
557	-1.85343	-1.7285
558	-1.84877	-1.72572
559	-1.84623	-1.72168
560	-1.84913	-1.71455
561	-1.85812	-1.70476
562	-1.86873	-1.68947
563	-1.87811	-1.67291
564	-1.88627	-1.65686
565	-1.89288	-1.64342
566	-1.89545	-1.63384
567	-1.89672	-1.6289
568	-1.89559	-1.62625
569	-1.89129	-1.62532
570	-1.8842	-1.62334
571	-1.88066	-1.622
572	-1.87709	-1.62
573	-1.87404	-1.62053
574	-1.87161	-1.6223
575	-1.87261	-1.62709
576	-1.87362	-1.6312
577	-1.87554	-1.63289
578	-1.87897	-1.63327
579	-1.88539	-1.6317
580	-1.88934	-1.62865
581	-1.89517	-1.62711
582	-1.90377	-1.62861
583	-1.91533	-1.6291
584	-1.92809	-1.62987
585	-1.94458	-1.62951
586	-1.95775	-1.62565
587	-1.96494	-1.61881
588	-1.96698	-1.61075
589	-1.96518	-1.60064
590	-1.95835	-1.59025
591	-1.94742	-1.58251
592	-1.93428	-1.57467
593	-1.92212	-1.568
594	-1.9135	-1.56322
595	-1.90849	-1.55997
596	-1.90538	-1.55515
597	-1.9056	-1.55376
598	-1.9082	-1.55373
599	-1.90533	-1.55429
600	-1.89934	-1.5541
601	-1.89213	-1.55469
602	-1.88685	-1.55284
603	-1.87988	-1.54951
604	-1.87734	-1.54529
605	-1.87581	-1.5436
606	-1.878	-1.54313
607	-1.88201	-1.54308
608	-1.88722	-1.54348
609	-1.88835	-1.54345
610	-1.88878	-1.54108
611	-1.88606	-1.53808
612	-1.87648	-1.53302
613	-1.86642	-1.52596
614	-1.86132	-1.52093
615	-1.85736	-1.51632
616	-1.85636	-1.5108
617	-1.85957	-1.50738
618	-1.86442	-1.50598
619	-1.86749	-1.50343
620	-1.8714	-1.5012
621	-1.87726	-1.49923
622	-1.88691	-1.49746
623	-1.89623	-1.49686
624	-1.9062	-1.4977
625	-1.91644	-1.49731
626	-1.92248	-1.49687
627	-1.927	-1.49583
628	-1.93015	-1.49343
629	-1.93149	-1.48942
630	-1.92967	-1.48887
631	-1.92988	-1.49
632	-1.92744	-1.49033
633	-1.92418	-1.49187
634	-1.91899	-1.49495
635	-1.9076	-1.49649
636	-1.89682	-1.49532
637	-1.88743	-1.49619
638	-1.87642	-1.49714
639	-1.86827	-1.4944
640	-1.86974	-1.4894
641	-1.86615	-1.48276
642	-1.85593	-1.47525
643	-1.84696	-1.46457
644	-1.83701	-1.45682
645	-1.82382	-1.45242
646	-1.81259	-1.45106
647	-1.80425	-1.45023
648	-1.79824	-1.45079
649	-1.79315	-1.45095
650	-1.78941	-1.45047
651	-1.78871	-1.44932
652	-1.79062	-1.448
653	-1.79239	-1.44492
654	-1.79133	-1.43981
655	-1.78829	-1.43273
656	-1.78459	-1.42801
657	-1.78207	-1.42286
658	-1.77733	-1.41957
659	-1.77646	-1.41885
660	-1.77677	-1.41911
661	-1.77726	-1.4188
662	-1.77765	-1.4212
663	-1.78301	-1.42406
664	-1.79054	-1.42558
665	-1.79932	-1.4248
666	-1.80657	-1.42134
667	-1.81662	-1.41559
668	-1.82196	-1.4101
669	-1.82275	-1.40564
670	-1.81848	-1.40116
671	-1.8155	-1.39728
672	-1.8063	-1.39192
673	-1.79666	-1.38608
674	-1.7865	-1.3822
675	-1.77682	-1.38031
676	-1.76466	-1.37906
677	-1.75473	-1.37893
678	-1.74589	-1.37992
679	-1.73794	-1.37734
680	-1.72999	-1.37407
681	-1.72093	-1.37081
682	-1.71157	-1.3678
683	-1.70408	-1.36341
684	-1.69968	-1.36115
685	-1.69924	-1.36196
686	-1.70383	-1.36329
687	-1.70977	-1.36518
688	-1.71231	-1.36819
689	-1.71533	-1.36883
690	-1.71519	-1.36559
691	-1.71187	-1.36305
692	-1.70909	-1.36239
693	-1.71148	-1.36362
694	-1.71453	-1.36785
695	-1.72255	-1.37373
696	-1.73199	-1.37954
697	-1.7386	-1.38125
698	-1.74339	-1.37953
699	-1.74446	-1.37386
700	-1.7406	-1.36533
701	-1.73317	-1.35365
702	-1.72771	-1.34327
703	-1.72391	-1.33239
704	-1.72369	-1.32331
705	-1.727	-1.31882
706	-1.73512	-1.31633
707	-1.73998	-1.31379
708	-1.73841	-1.31233
709	-1.7313	-1.31091
710	-1.72528	-1.30685
711	-1.71874	-1.30385
712	-1.7153	-1.30105
713	-1.71663	-1.30056
714	-1.7181	-1.30149
715	-1.7167	-1.30432
716	-1.71608	-1.30856
717	-1.71545	-1.31536
718	-1.71394	-1.31936
719	-1.71565	-1.32247
720	-1.71773	-1.32471
721	-1.71907	-1.32672
722	-1.7215	-1.32682
723	-1.72384	-1.32938
724	-1.72468	-1.33232
725	-1.7267	-1.33455
726	-1.72662	-1.33384
727	-1.7236	-1.32974
728	-1.72134	-1.32114
729	-1.72303	-1.3117
730	-1.72709	-1.30325
731	-1.7356	-1.29497
732	-1.74642	-1.28887
733	-1.75749	-1.28576
734	-1.76625	-1.28315
735	-1.77544	-1.27968
736	-1.78224	-1.27687
737	-1.78683	-1.27609
738	-1.79243	-1.27781
739	-1.79389	-1.28123
740	-1.78779	-1.28595
741	-1.77832	-1.29294
742	-1.77007	-1.29747
743	-1.75475	-1.29782
744	-1.74057	-1.29539
745	-1.72917	-1.29426
746	-1.71607	-1.28923
747	-1.70406	-1.2841
748	-1.69689	-1.27978
749	-1.69165	-1.27628
750	-1.69188	-1.26854
751	-1.69652	-1.26315
752	-1.70063	-1.259
753	-1.70553	-1.25639
754	-1.70925	-1.25335
755	-1.70901	-1.2522
756	-1.70704	-1.24763
757	-1.70438	-1.24277
758	-1.70158	-1.23643
759	-1.70007	-1.23026
760	-1.69732	-1.22498
761	-1.69483	-1.22396
762	-1.69446	-1.22427
763	-1.69765	-1.22532
764	-1.7012	-1.22721
765	-1.70094	-1.22925
766	-1.69951	-1.22998
767	-1.69931	-1.22862
768	-1.69789	-1.22745
769	-1.69646	-1.22605
770	-1.69926	-1.22239
771	-1.70568	-1.21842
772	-1.71222	-1.21526
773	-1.71825	-1.21091
774	-1.72433	-1.20618
775	-1.73157	-1.2007
776	-1.73921	-1.19492
777	-1.74472	-1.18932
778	-1.74919	-1.18647
779	-1.75078	-1.18554
780	-1.74946	-1.185
781	-1.74174	-1.18446
782	-1.72849	-1.18325
783	-1.71364	-1.17827
784	-1.69788	-1.17205
785	-1.6834	-1.16764
786	-1.67459	-1.1632
787	-1.67271	-1.15963
788	-1.6758	-1.15851
789	-1.68886	-1.15744
790	-1.70484	-1.1579
791	-1.71543	-1.1587
792	-1.72335	-1.15982
793	-1.72609	-1.16272
794	-1.72249	-1.16436
795	-1.71791	-1.16427
796	-1.71628	-1.1632
797	-1.70999	-1.16136
798	-1.70205	-1.15687
799	-1.69116	-1.15423
800	-1.67732	-1.15168
801	-1.66217	-1.14983
802	-1.65148	-1.148
803	-1.64409	-1.14493
804	-1.6393	-1.14109
805	-1.63301	-1.13675
806	-1.6284	-1.13259
807	-1.62251	-1.12831
808	-1.61484	-1.12563
809	-1.60698	-1.12306
810	-1.604	-1.12044
811	-1.59907	-1.11893
812	-1.59717	-1.11888
813	-1.59785	-1.11876
814	-1.59744	-1.11567
815	-1.59586	-1.11128
816	-1.59889	-1.10613
817	-1.60241	-1.09891
818	-1.60449	-1.09255
819	-1.60677	-1.08871
820	-1.60899	-1.08589
821	-1.6105	-1.0857
822	-1.60726	-1.08874
823	-1.60451	-1.09401
824	-1.60285	-1.10078
825	-1.6016	-1.11018
826	-1.59946	-1.11742
827	-1.60243	-1.12336
828	-1.60576	-1.128
829	-1.60818	-1.12973
830	-1.60959	-1.12809
831	-1.61125	-1.12521
832	-1.60996	-1.12035
833	-1.60512	-1.11436
834	-1.603	-1.10909
835	-1.60487	-1.10375
836	-1.606	-1.09933
837	-1.60824	-1.09533
838	-1.61626	-1.0901
839	-1.62357	-1.08688
840	-1.62869	-1.08637
841	-1.6339	-1.08589
842	-1.64242	-1.08702
843	-1.6467	-1.09083
844	-1.64799	-1.09449
845	-1.64819	-1.09576
846	-1.64845	-1.09592
847	-1.64383	-1.09486
848	-1.64021	-1.09406
849	-1.63882	-1.09327
850	-1.63541	-1.09539
851	-1.63303	-1.09805
852	-1.63364	-1.1006
853	-1.6342	-1.09945
854	-1.63483	-1.09518
855	-1.64204	-1.08898
856	-1.64936	-1.08209
857	-1.65466	-1.07619
858	-1.65887	-1.07213
859	-1.66072	-1.07026
860	-1.6575	-1.06812
861	-1.65188	-1.0667
862	-1.64396	-1.06474
863	-1.63724	-1.06297
864	-1.6336	-1.06125
865	-1.63028	-1.06109
866	-1.63203	-1.06034
867	-1.6384	-1.05919
868	-1.64399	-1.05766
869	-1.64821	-1.05575
870	-1.65217	-1.05206
871	-1.65512	-1.04871
872	-1.65593	-1.04542
873	-1.65581	-1.04156
874	-1.65597	-1.03778
875	-1.65469	-1.03654
876	-1.64895	-1.03547
877	-1.64655	-1.035
878	-1.6461	-1.03516
879	-1.64799	-1.03611
880	-1.65443	-1.03579
881	-1.66114	-1.03555
882	-1.66308	-1.03511
883	-1.66403	-1.03503
884	-1.65888	-1.03525
885	-1.65167	-1.03586
886	-1.64418	-1.03662
887	-1.63756	-1.03691
888	-1.632	-1.03616
889	-1.62973	-1.03641
890	-1.62638	-1.03719
891	-1.62379	-1.03925
892	-1.61961	-1.04293
893	-1.61377	-1.04858
894	-1.60617	-1.05338
895	-1.59907	-1.05779
896	-1.5935	-1.06072
897	-1.58925	-1.06456
898	-1.58791	-1.06884
899	-1.59074	-1.07303
900	-1.59569	-1.0754
901	-1.60146	-1.07741
902	-1.60794	-1.07688
903	-1.61389	-1.07306
904	-1.61794	-1.06817
905	-1.61925	-1.06432
906	-1.61927	-1.06293
907	-1.62257	-1.0624
908	-1.6269	-1.06401
909	-1.62968	-1.0672
910	-1.63294	-1.06812
911	-1.63348	-1.06486
912	-1.63123	-1.06021
913	-1.62575	-1.05448
914	-1.61884	-1.04951
915	-1.61345	-1.04705
916	-1.60902	-1.0478
917	-1.60336	-1.05145
918	-1.6025	-1.05562
919	-1.60222	-1.05615
920	-1.60052	-1.05711
921	-1.60002	-1.05887
922	-1.59827	-1.0594
923	-1.5929	-1.06115
924	-1.59267	-1.06267
925	-1.59457	-1.06438
926	-1.59977	-1.06356
927	-1.60585	-1.06098
928	-1.60973	-1.05521
929	-1.60979	-1.05051
930	-1.60587	-1.04635
931	-1.59779	-1.0438
932	-1.59117	-1.04191
933	-1.58398	-1.04142
934	-1.57645	-1.04182
935	-1.56911	-1.03941
936	-1.56235	-1.03613
937	-1.55848	-1.03328
938	-1.55737	-1.03088
939	-1.55631	-1.02819
940	-1.55707	-1.02757
941	-1.55876	-1.02793
942	-1.55578	-1.02644
943	-1.54998	-1.02212
944	-1.54152	-1.01817
945	-1.52925	-1.01352
946	-1.51213	-1.00702
947	-1.49771	-1.00178
948	-1.48697	-0.99926
949	-1.4817	-0.99686
950	-1.47961	-0.99444
951	-1.48091	-0.99108
952	-1.48148	-0.9903
953	-1.4823	-0.99027
954	-1.47855	-0.98879
955	-1.47357	-0.98706
956	-1.47198	-0.98732
957	-1.46743	-0.98446
958	-1.4601	-0.98292
959	-1.45487	-0.98189
960	-1.45227	-0.98174
961	-1.44813	-0.98056
962	-1.44637	-0.98328
963	-1.44399	-0.98693
964	-1.44182	-0.99132
965	-1.43887	-0.99499
966	-1.43661	-0.9994
967	-1.43507	-0.99992
968	-1.43274	-0.99666
969	-1.42882	-0.9911
970	-1.42497	-0.98719
971	-1.42111	-0.98389
972	-1.42088	-0.98216
973	-1.42659	-0.97918
974	-1.43284	-0.97861
975	-1.4385	-0.97642
976	-1.4415	-0.9733
977	-1.4401	-0.96934
978	-1.43644	-0.96887
979	-1.43448	-0.96866
980	-1.43147	-0.97021
981	-1.42755	-0.9732
982	-1.42251	-0.97855
983	-1.41785	-0.98364
984	-1.41143	-0.98929
985	-1.40527	-0.99433
986	-1.39958	-0.9982
987	-1.3959	-1.00201
988	-1.38896	-1.00629
989	-1.38348	-1.01014
990	-1.37867	-1.01238
991	-1.37404	-1.01577
992	-1.3722	-1.01657
993	-1.37344	-1.0159
994	-1.37381	-1.01502
995	-1.37817	-1.01475
996	-1.3844	-1.01186
997	-1.38914	-1.01006
998	-1.39443	-1.00786
999	-1.40032	-1.00534
1000	-1.40355	-1.00327
1001	-1.40931	-1.00323
1002	-1.413	-1.00095
1003	-1.41336	-0.99763
1004	-1.41357	-0.9943
1005	-1.41495	-0.99259
1006	-1.41402	-0.99214
1007	-1.41126	-0.99397
1008	-1.40948	-0.99724
1009	-1.40656	-1.00292
1010	-1.39846	-1.00932
1011	-1.38817	-1.01452
1012	-1.38062	-1.02056
1013	-1.3715	-1.02672
1014	-1.36075	-1.0305
1015	-1.35097	-1.03239
1016	-1.34019	-1.032
1017	-1.32796	-1.02949
1018	-1.31922	-1.02566
1019	-1.31376	-1.0177
1020	-1.31207	-1.00783
1021	-1.31454	-0.99681
1022	-1.31838	-0.98495
1023	-1.32256	-0.9716
1024	-1.32478	-0.96227
1025	-1.32511	-0.95346
1026	-1.3239	-0.94705
1027	-1.32206	-0.94313
1028	-1.31703	-0.94172
1029	-1.31139	-0.94089
1030	-1.30216	-0.94122
1031	-1.29209	-0.94396
1032	-1.28194	-0.94749
1033	-1.27308	-0.95143
1034	-1.26461	-0.95549
1035	-1.2593	-0.96091
1036	-1.25439	-0.96554
1037	-1.25119	-0.96886
1038	-1.25037	-0.97209
1039	-1.25305	-0.97489
1040	-1.25515	-0.97612
1041	-1.25656	-0.97744
1042	-1.25574	-0.97791
1043	-1.25526	-0.97736
1044	-1.25558	-0.97532
1045	-1.25893	-0.97253
1046	-1.26258	-0.96896
1047	-1.2662	-0.96604
1048	-1.26671	-0.96383
1049	-1.26313	-0.96261
1050	-1.25511	-0.96101
1051	-1.24702	-0.95949
1052	-1.2389	-0.95658
1053	-1.23309	-0.95252
1054	-1.23044	-0.9479
1055	-1.23189	-0.94309
1056	-1.23525	-0.93872
1057	-1.23921	-0.93523
1058	-1.24144	-0.93287
1059	-1.24023	-0.93149
1060	-1.23788	-0.92876
1061	-1.23633	-0.92659
1062	-1.23502	-0.92364
1063	-1.23436	-0.92009
1064	-1.23489	-0.9176
1065	-1.23456	-0.91753
1066	-1.23065	-0.91539
1067	-1.22672	-0.914
1068	-1.22563	-0.91397
1069	-1.22733	-0.91046
1070	-1.23002	-0.9075
1071	-1.23425	-0.90584
1072	-1.23809	-0.90465
1073	-1.23907	-0.90322
1074	-1.24055	-0.90509
1075	-1.24315	-0.90614
1076	-1.24634	-0.90747
1077	-1.24931	-0.9086
1078	-1.2524	-0.90825
1079	-1.25358	-0.90512
1080	-1.25109	-0.90233
1081	-1.24506	-0.89893
1082	-1.23604	-0.89451
1083	-1.22601	-0.89112
1084	-1.21552	-0.88948
1085	-1.20791	-0.88658
1086	-1.2036	-0.88288
1087	-1.20436	-0.8808
1088	-1.20709	-0.87973
1089	-1.20917	-0.87848
1090	-1.20959	-0.87811
1091	-1.20909	-0.8774
1092	-1.20762	-0.87594
1093	-1.20364	-0.87538
1094	-1.19891	-0.87684
1095	-1.19596	-0.87821
1096	-1.19204	-0.88139
1097	-1.18893	-0.88645
1098	-1.18756	-0.89163
1099	-1.18653	-0.89529
1100	-1.18428	-0.89997
1101	-1.18841	-0.90387
1102	-1.19224	-0.90585
1103	-1.19567	-0.90579
1104	-1.20014	-0.90594
1105	-1.20491	-0.90618
1106	-1.20198	-0.90556
1107	-1.19544	-0.90444
1108	-1.18668	-0.90164
1109	-1.17789	-0.89754
1110	-1.16751	-0.89125
1111	-1.16	-0.88532
1112	-1.15384	-0.88079
1113	-1.14871	-0.87809
1114	-1.14228	-0.87524
1115	-1.13577	-0.87405
1116	-1.13063	-0.87415
1117	-1.12838	-0.87384
1118	-1.12937	-0.87372
1119	-1.13067	-0.8737
1120	-1.13256	-0.87306
1121	-1.13325	-0.87196
1122	-1.13406	-0.87064
1123	-1.13417	-0.86994
1124	-1.1354	-0.86967
1125	-1.13847	-0.86922
1126	-1.14407	-0.86819
1127	-1.14792	-0.86649
1128	-1.14864	-0.86538
1129	-1.14796	-0.86379
1130	-1.14946	-0.86208
1131	-1.14717	-0.86019
1132	-1.14192	-0.85953
1133	-1.13763	-0.8575
1134	-1.13193	-0.85622
1135	-1.12093	-0.8557
1136	-1.10917	-0.85602
1137	-1.10024	-0.85533
1138	-1.09134	-0.85489
1139	-1.08321	-0.85383
1140	-1.07578	-0.85289
1141	-1.06882	-0.8519
1142	-1.06054	-0.85195
1143	-1.05299	-0.85375
1144	-1.04639	-0.85685
1145	-1.04235	-0.85949
1146	-1.0402	-0.86092
1147	-1.04009	-0.86245
1148	-1.03991	-0.86064
1149	-1.04146	-0.85695
1150	-1.04206	-0.85301
1151	-1.04218	-0.84874
1152	-1.04223	-0.84294
1153	-1.0443	-0.83788
1154	-1.04714	-0.83355
1155	-1.05085	-0.82957
1156	-1.05472	-0.82785
1157	-1.05915	-0.82837
1158	-1.06099	-0.82983
1159	-1.05899	-0.83153
1160	-1.05302	-0.83357
1161	-1.04816	-0.83432
1162	-1.04699	-0.83317
1163	-1.04724	-0.83232
1164	-1.04729	-0.8323
1165	-1.04793	-0.83218
1166	-1.04624	-0.83125
1167	-1.03914	-0.83128
1168	-1.0321	-0.83224
1169	-1.02793	-0.83423
1170	-1.0266	-0.83742
1171	-1.02568	-0.84151
1172	-1.0267	-0.84744
1173	-1.02905	-0.85292
1174	-1.03053	-0.85742
1175	-1.03171	-0.861
1176	-1.03483	-0.86289
1177	-1.03717	-0.8612
1178	-1.03608	-0.85567
1179	-1.03526	-0.84705
1180	-1.03347	-0.83578
1181	-1.02968	-0.82432
1182	-1.02671	-0.81119
1183	-1.02562	-0.80139
1184	-1.02529	-0.79354
1185	-1.02606	-0.7877
1186	-1.02595	-0.78464
1187	-1.02465	-0.78515
1188	-1.0233	-0.78362
1189	-1.02319	-0.78276
1190	-1.02295	-0.78261
1191	-1.02415	-0.78207
1192	-1.02617	-0.78066
1193	-1.02914	-0.78053
1194	-1.03184	-0.78076
1195	-1.03481	-0.77969
1196	-1.0379	-0.77709
1197	-1.03803	-0.77424
1198	-1.03418	-0.77442
1199	-1.02784	-0.77518
1200	-1.02041	-0.77832
1201	-1.01395	-0.78369
1202	-1.00948	-0.79036
1203	-1.0063	-0.79383
1204	-1.00385	-0.79604
1205	-1.0029	-0.798
1206	-0.99972	-0.79881
1207	-0.99455	-0.79907
1208	-0.98925	-0.80036
1209	-0.98418	-0.8008
1210	-0.97589	-0.79934
1211	-0.96668	-0.79756
1212	-0.95862	-0.79701
1213	-0.95088	-0.79731
1214	-0.94201	-0.80066
1215	-0.93433	-0.80496
1216	-0.9286	-0.80763
1217	-0.92324	-0.80772
1218	-0.91778	-0.80605
1219	-0.91307	-0.80196
1220	-0.91006	-0.7972
1221	-0.90705	-0.79369
1222	-0.90459	-0.79179
1223	-0.90459	-0.78948
1224	-0.906	-0.78758
1225	-0.90733	-0.78748
1226	-0.91085	-0.78967
1227	-0.91516	-0.79257
1228	-0.91869	-0.79744
1229	-0.92256	-0.80236
1230	-0.92572	-0.8056
1231	-0.92908	-0.8065
1232	-0.93152	-0.80515
1233	-0.93329	-0.8019
1234	-0.93256	-0.79752
1235	-0.93256	-0.7927
1236	-0.9298	-0.78942
1237	-0.92836	-0.78744
1238	-0.92686	-0.78467
1239	-0.92694	-0.78142
1240	-0.92496	-0.77877
1241	-0.92128	-0.77507
1242	-0.91624	-0.77128
1243	-0.90919	-0.76772
1244	-0.89853	-0.76609
1245	-0.88872	-0.76542
1246	-0.88172	-0.76531
1247	-0.87354	-0.76556
1248	-0.86611	-0.76774
1249	-0.86214	-0.76886
1250	-0.85963	-0.76873
1251	-0.85912	-0.76831
1252	-0.86241	-0.76807
1253	-0.86788	-0.76864
1254	-0.87202	-0.76994
1255	-0.87576	-0.77135
1256	-0.87768	-0.77261
1257	-0.87685	-0.77259
1258	-0.8748	-0.7705
1259	-0.87318	-0.76826
1260	-0.87217	-0.76776
1261	-0.87253	-0.76844
1262	-0.87372	-0.77006
1263	-0.87534	-0.77074
1264	-0.87605	-0.77092
1265	-0.87545	-0.7698
1266	-0.87323	-0.76704
1267	-0.87142	-0.76336
1268	-0.868	-0.76213
1269	-0.86399	-0.7615
1270	-0.86078	-0.76004
1271	-0.85901	-0.75856
1272	-0.85682	-0.75895
1273	-0.85567	-0.75645
1274	-0.85592	-0.75376
1275	-0.85638	-0.75124
1276	-0.85478	-0.75021
1277	-0.85278	-0.74728
1278	-0.84982	-0.74525
1279	-0.84745	-0.74274
1280	-0.84315	-0.7403
1281	-0.83967	-0.73703
1282	-0.83591	-0.73468
1283	-0.83483	-0.73379
1284	-0.83516	-0.73339
1285	-0.8383	-0.73506
1286	-0.84092	-0.73658
1287	-0.84408	-0.73775
1288	-0.84491	-0.73844
1289	-0.84533	-0.7392
1290	-0.84634	-0.73766
1291	-0.84934	-0.73489
1292	-0.85307	-0.7316
1293	-0.8599	-0.72859
1294	-0.86714	-0.72476
1295	-0.8732	-0.72098
1296	-0.87656	-0.71881
1297	-0.87884	-0.71705
1298	-0.87956	-0.7146
1299	-0.87949	-0.7134
1300	-0.8797	-0.71277
1301	-0.88066	-0.71358
1302	-0.88121	-0.71488
1303	-0.88012	-0.71768
1304	-0.87833	-0.72003
1305	-0.87419	-0.72223
1306	-0.86855	-0.72229
1307	-0.86102	-0.7227
1308	-0.85385	-0.72239
1309	-0.84614	-0.72182
1310	-0.83836	-0.72086
1311	-0.82929	-0.71989
1312	-0.82092	-0.71969
1313	-0.81209	-0.7192
1314	-0.80398	-0.71859
1315	-0.79797	-0.71719
1316	-0.79483	-0.7146
1317	-0.79102	-0.70991
1318	-0.78637	-0.70334
1319	-0.77934	-0.69458
1320	-0.77085	-0.68717
1321	-0.76078	-0.6827
1322	-0.75274	-0.67964
1323	-0.74785	-0.68001
1324	-0.74543	-0.68552
1325	-0.74356	-0.69282
1326	-0.74252	-0.69859
1327	-0.74036	-0.70349
1328	-0.73788	-0.70644
1329	-0.73727	-0.70641
1330	-0.73687	-0.70448
1331	-0.73951	-0.70223
1332	-0.74356	-0.69989
1333	-0.74597	-0.69707
1334	-0.74756	-0.69397
1335	-0.75136	-0.69081
1336	-0.7527	-0.68875
1337	-0.75479	-0.68626
1338	-0.75796	-0.68394
1339	-0.76078	-0.68272
1340	-0.76098	-0.68195
1341	-0.7607	-0.67989
1342	-0.75916	-0.6779
1343	-0.7578	-0.67715
1344	-0.75612	-0.67626
1345	-0.75365	-0.67275
1346	-0.75184	-0.66994
1347	-0.75081	-0.66735
1348	-0.74981	-0.66343
1349	-0.74921	-0.66033
1350	-0.7495	-0.66087
1351	-0.75008	-0.66244
1352	-0.75049	-0.66572
1353	-0.74913	-0.66978
1354	-0.74611	-0.67297
1355	-0.74421	-0.67456
1356	-0.74328	-0.67571
1357	-0.74323	-0.67617
1358	-0.74328	-0.67462
1359	-0.74238	-0.67226
1360	-0.74095	-0.67073
1361	-0.73787	-0.66725
1362	-0.733	-0.66252
1363	-0.73027	-0.65925
1364	-0.7305	-0.65638
1365	-0.7315	-0.65345
1366	-0.73353	-0.65164
1367	-0.73781	-0.64955
1368	-0.74345	-0.64641
1369	-0.74955	-0.64396
1370	-0.7557	-0.6403
1371	-0.76103	-0.6367
1372	-0.76473	-0.63339
1373	-0.76649	-0.63154
1374	-0.7653	-0.62865
1375	-0.76332	-0.62585
1376	-0.76051	-0.62334
1377	-0.75763	-0.62085
1378	-0.75388	-0.61914
1379	-0.75035	-0.61889
1380	-0.74536	-0.6211
1381	-0.73973	-0.62517
1382	-0.73253	-0.63135
1383	-0.72374	-0.63861
1384	-0.71587	-0.64579
1385	-0.71082	-0.65239
1386	-0.70736	-0.65661
1387	-0.70738	-0.65961
1388	-0.71047	-0.65952
1389	-0.71442	-0.65843
1390	-0.71721	-0.6555
1391	-0.72024	-0.65164
1392	-0.72059	-0.64641
1393	-0.71988	-0.6421
1394	-0.71826	-0.63735
1395	-0.7163	-0.63334
1396	-0.71558	-0.63071
1397	-0.71546	-0.62837
1398	-0.71551	-0.62444
1399	-0.71531	-0.62082
1400	-0.71369	-0.61762
1401	-0.70983	-0.61524
1402	-0.70612	-0.61333
1403	-0.70197	-0.6143
1404	-0.69747	-0.61572
1405	-0.69456	-0.6163
1406	-0.69177	-0.61518
1407	-0.68834	-0.61351
1408	-0.68418	-0.61045
1409	-0.6798	-0.6074
1410	-0.67676	-0.60561
1411	-0.6739	-0.60574
1412	-0.6718	-0.6061
1413	-0.67032	-0.60775
1414	-0.67052	-0.60951
1415	-0.67126	-0.60994
1416	-0.67214	-0.61063
1417	-0.672	-0.61383
1418	-0.67247	-0.61715
1419	-0.67212	-0.62068
1420	-0.66862	-0.62471
1421	-0.66512	-0.62795
1422	-0.66439	-0.62942
1423	-0.66228	-0.62809
1424	-0.66029	-0.62533
1425	-0.66183	-0.62098
1426	-0.66492	-0.61489
1427	-0.66638	-0.60876
1428	-0.66926	-0.60396
1429	-0.67349	-0.59826
1430	-0.67677	-0.59434
1431	-0.67867	-0.59038
1432	-0.68085	-0.58689
1433	-0.6818	-0.58445
1434	-0.67938	-0.58433
1435	-0.67508	-0.58397
1436	-0.67177	-0.58582
1437	-0.66835	-0.58777
1438	-0.6649	-0.59027
1439	-0.66124	-0.59367
1440	-0.65619	-0.59743
1441	-0.65089	-0.60146
1442	-0.6455	-0.60678
1443	-0.6419	-0.61213
1444	-0.63956	-0.61669
1445	-0.63722	-0.62173
1446	-0.63546	-0.62667
1447	-0.63571	-0.63039
1448	-0.63822	-0.63454
1449	-0.64379	-0.6398
1450	-0.65257	-0.64362
1451	-0.66113	-0.64657
1452	-0.66759	-0.64854
1453	-0.67043	-0.64848
1454	-0.67031	-0.64597
1455	-0.667	-0.64284
1456	-0.66145	-0.63861
1457	-0.65415	-0.63422
1458	-0.64769	-0.63023
1459	-0.64031	-0.6265
1460	-0.63495	-0.62328
1461	-0.63192	-0.62136
1462	-0.63062	-0.61926
1463	-0.62886	-0.61797
1464	-0.62852	-0.61782
1465	-0.62775	-0.61866
1466	-0.62558	-0.6199
1467	-0.62298	-0.6207
1468	-0.62033	-0.6205
1469	-0.61898	-0.61907
1470	-0.61641	-0.61715
1471	-0.61462	-0.61322
1472	-0.61481	-0.61119
1473	-0.61639	-0.61019
1474	-0.61758	-0.61007
1475	-0.62107	-0.61202
1476	-0.62378	-0.61632
1477	-0.62583	-0.6202
1478	-0.62674	-0.62445
1479	-0.62737	-0.62823
1480	-0.62688	-0.63045
1481	-0.62587	-0.63235
1482	-0.62399	-0.63421
1483	-0.62313	-0.63444
1484	-0.62233	-0.63413
1485	-0.62015	-0.6324
1486	-0.61729	-0.62919
1487	-0.61472	-0.62443
1488	-0.61026	-0.619
1489	-0.60498	-0.61565
1490	-0.59995	-0.6124
1491	-0.5953	-0.60917
1492	-0.58919	-0.60659
1493	-0.58387	-0.60628
1494	-0.57797	-0.60634
1495	-0.57192	-0.60769
1496	-0.56726	-0.60791
1497	-0.56369	-0.60851
1498	-0.56031	-0.6083
1499	-0.55859	-0.60619
1500	-0.55859	-0.60339
1501	-0.56043	-0.60226
1502	-0.5639	-0.60168
1503	-0.56839	-0.60031
1504	-0.57251	-0.5988
1505	-0.57635	-0.59802
1506	-0.57684	-0.59802
1507	-0.57554	-0.59681
1508	-0.57351	-0.59459
1509	-0.57089	-0.59228
1510	-0.56753	-0.58773
1511	-0.56459	-0.58202
1512	-0.56153	-0.5766
1513	-0.55826	-0.57171
1514	-0.55678	-0.56838
1515	-0.55798	-0.56575
1516	-0.56047	-0.56306
1517	-0.56314	-0.5598
1518	-0.56616	-0.5582
1519	-0.56966	-0.55553
1520	-0.57196	-0.55389
1521	-0.57352	-0.55253
1522	-0.57475	-0.55233
1523	-0.57659	-0.55141
1524	-0.57705	-0.54944
1525	-0.57711	-0.54598
1526	-0.57702	-0.54262
1527	-0.57772	-0.53957
1528	-0.57948	-0.53671
1529	-0.58232	-0.53438
1530	-0.58541	-0.53379
1531	-0.58976	-0.5336
1532	-0.59371	-0.53406
1533	-0.59453	-0.53611
1534	-0.59448	-0.53839
1535	-0.59347	-0.5403
1536	-0.59099	-0.54188
1537	-0.58708	-0.54333
1538	-0.58303	-0.5447
1539	-0.5782	-0.54701
1540	-0.5761	-0.55004
1541	-0.57435	-0.55428
1542	-0.57512	-0.55834
1543	-0.57784	-0.56156
1544	-0.58097	-0.56534
1545	-0.5813	-0.56932
1546	-0.58145	-0.57131
1547	-0.58003	-0.57208
1548	-0.57711	-0.57206
1549	-0.5724	-0.57149
1550	-0.56863	-0.57087
1551	-0.56504	-0.57079
1552	-0.56253	-0.56969
1553	-0.56071	-0.56878
1554	-0.55913	-0.5669
1555	-0.55684	-0.56432
1556	-0.55455	-0.56188
1557	-0.5517	-0.5612
1558	-0.55046	-0.56
1559	-0.5519	-0.55973
1560	-0.55475	-0.55836
1561	-0.55778	-0.55734
1562	-0.56214	-0.55594
1563	-0.56504	-0.55446
1564	-0.56493	-0.55192
1565	-0.56476	-0.55119
1566	-0.56565	-0.55151
1567	-0.56617	-0.55364
1568	-0.56668	-0.55707
1569	-0.56855	-0.5608
1570	-0.56967	-0.56378
1571	-0.56994	-0.56647
1572	-0.56851	-0.56668
1573	-0.56563	-0.56607
1574	-0.5617	-0.56481
1575	-0.55762	-0.56323
1576	-0.55389	-0.56006
1577	-0.55082	-0.5565
1578	-0.54984	-0.55325
1579	-0.5498	-0.55104
1580	-0.54821	-0.54981
1581	-0.54588	-0.54809
1582	-0.54306	-0.54759
1583	-0.54008	-0.54611
1584	-0.5378	-0.54324
1585	-0.53649	-0.53845
1586	-0.53647	-0.53451
1587	-0.53915	-0.52983
1588	-0.54071	-0.52524
1589	-0.54115	-0.52019
1590	-0.54298	-0.51492
1591	-0.54351	-0.50962
1592	-0.54114	-0.50498
1593	-0.53914	-0.50127
1594	-0.53798	-0.50018
1595	-0.53508	-0.50212
1596	-0.53257	-0.50621
1597	-0.53137	-0.51059
1598	-0.53013	-0.51705
1599	-0.52852	-0.52505
1600	-0.52765	-0.53131
1601	-0.52913	-0.53616
1602	-0.53106	-0.54142
1603	-0.53489	-0.54397
1604	-0.53873	-0.54426
1605	-0.54335	-0.54362
1606	-0.5468	-0.54186
1607	-0.54906	-0.54084
1608	-0.54758	-0.53974
1609	-0.54476	-0.53885
1610	-0.54229	-0.53881
1611	-0.53958	-0.53931
1612	-0.53911	-0.53906
1613	-0.54093	-0.53901
1614	-0.54411	-0.53791
1615	-0.54709	-0.53737
1616	-0.5491	-0.53672
1617	-0.54835	-0.53556
1618	-0.54815	-0.53492
1619	-0.54972	-0.53511
1620	-0.55135	-0.53366
1621	-0.55689	-0.53304
1622	-0.56428	-0.53201
1623	-0.57288	-0.53081
1624	-0.57985	-0.52923
1625	-0.58655	-0.52843
1626	-0.58816	-0.52657
1627	-0.58679	-0.52392
1628	-0.58073	-0.52043
1629	-0.5713	-0.5162
1630	-0.56031	-0.51119
1631	-0.55001	-0.50632
1632	-0.54098	-0.50186
1633	-0.53489	-0.49733
1634	-0.53253	-0.49218
1635	-0.53069	-0.48813
1636	-0.53145	-0.48362
1637	-0.53496	-0.47977
1638	-0.53812	-0.47573
1639	-0.5403	-0.47325
1640	-0.54358	-0.47116
1641	-0.54667	-0.47129
1642	-0.54666	-0.47188
1643	-0.54664	-0.47423
1644	-0.54739	-0.47682
1645	-0.54815	-0.47995
1646	-0.54788	-0.4822
1647	-0.54929	-0.48557
1648	-0.55237	-0.4887
1649	-0.55745	-0.49317
1650	-0.56193	-0.49805
1651	-0.56491	-0.50324
1652	-0.56664	-0.50809
1653	-0.56773	-0.51229
1654	-0.56593	-0.51361
1655	-0.56424	-0.51404
1656	-0.56387	-0.51404
1657	-0.5625	-0.51281
1658	-0.55978	-0.51164
1659	-0.55611	-0.51073
1660	-0.55176	-0.51138
1661	-0.54675	-0.51161
1662	-0.543	-0.51301
1663	-0.54039	-0.51387
1664	-0.54109	-0.51747
1665	-0.54273	-0.52085
1666	-0.54533	-0.5255
1667	-0.54881	-0.52964
1668	-0.5516	-0.53435
1669	-0.55332	-0.53699
1670	-0.55337	-0.53751
1671	-0.55198	-0.53617
1672	-0.54903	-0.53467
1673	-0.5455	-0.53267
1674	-0.54085	-0.53049
1675	-0.53539	-0.52845
1676	-0.52869	-0.52668
1677	-0.51982	-0.52433
1678	-0.51045	-0.52208
1679	-0.50048	-0.52022
1680	-0.49209	-0.51888
1681	-0.48539	-0.51649
1682	-0.48282	-0.51388
1683	-0.4817	-0.51148
1684	-0.48235	-0.50966
1685	-0.48484	-0.50659
1686	-0.48815	-0.50551
1687	-0.49032	-0.50467
1688	-0.49222	-0.50344
1689	-0.4934	-0.50161
1690	-0.49374	-0.50127
1691	-0.49418	-0.49951
1692	-0.49437	-0.49692
1693	-0.49613	-0.49505
1694	-0.49992	-0.49339
1695	-0.50489	-0.49195
1696	-0.51039	-0.49167
1697	-0.51821	-0.49419
1698	-0.52507	-0.49844
1699	-0.53017	-0.50476
1700	-0.53447	-0.51229
1701	-0.53864	-0.52165
1702	-0.5403	-0.52905
1703	-0.5415	-0.53581
1704	-0.54224	-0.54096
1705	-0.54149	-0.5448
1706	-0.53901	-0.54593
1707	-0.53584	-0.54671
1708	-0.53306	-0.54576
1709	-0.52963	-0.54417
1710	-0.52499	-0.54183
1711	-0.52091	-0.53942
1712	-0.51632	-0.53686
1713	-0.51061	-0.53505
1714	-0.50579	-0.53336
1715	-0.50146	-0.53257
1716	-0.49635	-0.53166
1717	-0.49266	-0.53143
1718	-0.48814	-0.52871
1719	-0.48338	-0.52557
1720	-0.47995	-0.52037
1721	-0.47611	-0.51707
1722	-0.4728	-0.51381
1723	-0.47097	-0.51264
1724	-0.47206	-0.51067
1725	-0.47482	-0.5108
1726	-0.48068	-0.5084
1727	-0.48798	-0.50609
1728	-0.49605	-0.5036
1729	-0.50248	-0.50241
1730	-0.50746	-0.50091
1731	-0.51045	-0.50114
1732	-0.512	-0.50299
1733	-0.51385	-0.50656
1734	-0.51532	-0.51008
1735	-0.51597	-0.51381
1736	-0.51549	-0.51696
1737	-0.5141	-0.51791
1738	-0.51038	-0.51722
1739	-0.50667	-0.51542
1740	-0.50284	-0.51188
1741	-0.49923	-0.5096
1742	-0.49456	-0.50681
1743	-0.49091	-0.50487
1744	-0.48556	-0.50339
1745	-0.4803	-0.50307
1746	-0.4751	-0.50098
1747	-0.47184	-0.50007
1748	-0.46908	-0.49784
1749	-0.46694	-0.49695
1750	-0.46442	-0.49579
1751	-0.46355	-0.49647
1752	-0.46252	-0.49731
1753	-0.46019	-0.49888
1754	-0.45975	-0.50056
1755	-0.45975	-0.50341
1756	-0.45854	-0.50451
1757	-0.45745	-0.5049
1758	-0.45767	-0.50648
1759	-0.45715	-0.50593
1760	-0.45719	-0.50395
1761	-0.45817	-0.50328
1762	-0.46011	-0.50141
1763	-0.46224	-0.49715
1764	-0.46488	-0.49399
1765	-0.46804	-0.49166
1766	-0.47098	-0.48787
1767	-0.47245	-0.48495
1768	-0.47411	-0.48373
1769	-0.47522	-0.4826
1770	-0.47398	-0.48207
1771	-0.47293	-0.4824
1772	-0.4722	-0.48413
1773	-0.47063	-0.48444
1774	-0.46881	-0.48446
1775	-0.46786	-0.48476
1776	-0.46708	-0.48496
1777	-0.46592	-0.485
1778	-0.46375	-0.48648
1779	-0.46057	-0.48921
1780	-0.45761	-0.49102
1781	-0.45387	-0.492
1782	-0.4507	-0.49264
1783	-0.44827	-0.49288
1784	-0.446	-0.49191
1785	-0.44495	-0.4908
1786	-0.44379	-0.49008
1787	-0.44266	-0.48904
1788	-0.44179	-0.48688
1789	-0.44133	-0.48483
1790	-0.43995	-0.48244
1791	-0.43895	-0.48083
1792	-0.43698	-0.47904
1793	-0.43551	-0.47851
1794	-0.43495	-0.47768
1795	-0.43474	-0.47908
1796	-0.43589	-0.4813
1797	-0.43868	-0.48474
1798	-0.44215	-0.48747
1799	-0.44524	-0.49096
1800	-0.44975	-0.49382
1801	-0.45406	-0.49633
1802	-0.46023	-0.4991
1803	-0.46786	-0.50222
1804	-0.476	-0.50531
1805	-0.48346	-0.50741
1806	-0.48936	-0.50894
1807	-0.49309	-0.51001
1808	-0.49357	-0.51182
1809	-0.49159	-0.51318
1810	-0.48744	-0.51441
1811	-0.48232	-0.51462
1812	-0.47543	-0.51396
1813	-0.46764	-0.51117
1814	-0.45964	-0.50878
1815	-0.45316	-0.50522
1816	-0.44758	-0.5019
1817	-0.44203	-0.49803
1818	-0.43827	-0.49525
1819	-0.43678	-0.49145
1820	-0.43461	-0.48762
1821	-0.43281	-0.48322
1822	-0.4321	-0.47943
1823	-0.43003	-0.47649
1824	-0.42841	-0.47495
1825	-0.42734	-0.47391
1826	-0.42607	-0.47461
1827	-0.4258	-0.47586
1828	-0.42799	-0.4768
1829	-0.43123	-0.47791
1830	-0.43459	-0.47924
1831	-0.43816	-0.48126
1832	-0.43983	-0.48488
1833	-0.44063	-0.48891
1834	-0.43995	-0.49398
1835	-0.43989	-0.50131
1836	-0.44014	-0.50734
1837	-0.44251	-0.5116
1838	-0.44405	-0.51541
1839	-0.44526	-0.51779
1840	-0.44461	-0.51877
1841	-0.44282	-0.52036
1842	-0.44033	-0.52162
1843	-0.43785	-0.52283
1844	-0.43426	-0.523
1845	-0.43191	-0.52175
1846	-0.43039	-0.51964
1847	-0.42989	-0.51661
1848	-0.42936	-0.51327
1849	-0.43034	-0.5092
1850	-0.43084	-0.50661
1851	-0.43255	-0.50207
1852	-0.43198	-0.49711
1853	-0.43043	-0.49211
1854	-0.42808	-0.4896
1855	-0.42609	-0.48658
1856	-0.42208	-0.48529
1857	-0.41886	-0.48565
1858	-0.41649	-0.48619
1859	-0.41559	-0.4865
1860	-0.4155	-0.48588
1861	-0.41776	-0.48682
1862	-0.42157	-0.48695
1863	-0.4278	-0.48817
1864	-0.43313	-0.48843
1865	-0.43861	-0.4904
1866	-0.44304	-0.49155
1867	-0.44608	-0.49289
1868	-0.44732	-0.49404
1869	-0.44783	-0.49469
1870	-0.44632	-0.4957
1871	-0.44481	-0.49566
1872	-0.44267	-0.49582
1873	-0.44114	-0.49586
1874	-0.44016	-0.49556
1875	-0.44061	-0.49412
1876	-0.44049	-0.49307
1877	-0.44113	-0.49231
1878	-0.43984	-0.48985
1879	-0.43762	-0.48848
1880	-0.43655	-0.48776
1881	-0.43515	-0.48775
1882	-0.43409	-0.48845
1883	-0.43462	-0.49097
1884	-0.43609	-0.49279
1885	-0.43706	-0.49413
1886	-0.43742	-0.49396
1887	-0.43532	-0.4931
1888	-0.43114	-0.49077
1889	-0.42492	-0.48741
1890	-0.41688	-0.48358
1891	-0.41085	-0.48134
1892	-0.40816	-0.47787
1893	-0.40845	-0.47545
1894	-0.40984	-0.47429
1895	-0.41333	-0.47433
1896	-0.41517	-0.4738
1897	-0.41526	-0.47347
1898	-0.41414	-0.4731
1899	-0.41354	-0.47194
1900	-0.41386	-0.47039
1901	-0.41682	-0.46885
1902	-0.42009	-0.46773
1903	-0.42375	-0.46618
1904	-0.42765	-0.46513
1905	-0.43085	-0.46314
1906	-0.43226	-0.46176
1907	-0.43426	-0.46002
1908	-0.43415	-0.45842
1909	-0.43176	-0.45767
1910	-0.42697	-0.45678
1911	-0.42059	-0.45604
1912	-0.41251	-0.45614
1913	-0.40673	-0.4554
1914	-0.40391	-0.45379
1915	-0.40254	-0.45425
1916	-0.40215	-0.45418
1917	-0.40367	-0.45302
1918	-0.4057	-0.45172
1919	-0.40766	-0.45105
1920	-0.40861	-0.45018
1921	-0.4101	-0.44963
1922	-0.40987	-0.4516
1923	-0.4079	-0.45488
1924	-0.40664	-0.45949
1925	-0.40616	-0.46364
1926	-0.40554	-0.46792
1927	-0.40507	-0.47129
1928	-0.40458	-0.47463
1929	-0.40305	-0.4766
1930	-0.40202	-0.47788
1931	-0.40357	-0.47829
1932	-0.40835	-0.47893
1933	-0.415	-0.47921
1934	-0.42241	-0.47909
1935	-0.4301	-0.47903
1936	-0.43572	-0.48089
1937	-0.43907	-0.48333
1938	-0.44134	-0.48553
1939	-0.44301	-0.48748
1940	-0.44306	-0.48983
1941	-0.44143	-0.49088
1942	-0.43808	-0.4908
1943	-0.43268	-0.49064
1944	-0.42576	-0.49119
1945	-0.41801	-0.49055
1946	-0.41054	-0.49037
1947	-0.40423	-0.49054
1948	-0.4	-0.48947
1949	-0.39711	-0.48784
1950	-0.39466	-0.48686
1951	-0.39335	-0.48678
1952	-0.3939	-0.48631
1953	-0.39472	-0.48815
1954	-0.39609	-0.49055
1955	-0.40037	-0.49377
1956	-0.40453	-0.49649
1957	-0.40868	-0.49993
1958	-0.4122	-0.50251
1959	-0.41539	-0.50417
1960	-0.41692	-0.50472
1961	-0.41945	-0.50374
1962	-0.42026	-0.50084
1963	-0.42213	-0.49757
1964	-0.42436	-0.49587
1965	-0.42604	-0.49307
1966	-0.42776	-0.4909
1967	-0.43116	-0.48924
1968	-0.4339	-0.48911
1969	-0.4353	-0.48758
1970	-0.43636	-0.48749
1971	-0.43532	-0.48752
1972	-0.43317	-0.48756
1973	-0.42955	-0.48661
1974	-0.42549	-0.48506
1975	-0.42224	-0.48302
1976	-0.42023	-0.48098
1977	-0.41876	-0.4789
1978	-0.41952	-0.4765
1979	-0.42144	-0.47487
1980	-0.42196	-0.47415
1981	-0.42258	-0.47204
1982	-0.42262	-0.47002
1983	-0.42137	-0.4688
1984	-0.41969	-0.46776
1985	-0.41792	-0.46587
1986	-0.4148	-0.46454
1987	-0.41136	-0.46378
1988	-0.40695	-0.46211
1989	-0.40246	-0.4607
1990	-0.39849	-0.45947
1991	-0.39516	-0.45791
1992	-0.39058	-0.45668
1993	-0.38657	-0.45651
1994	-0.38232	-0.45715
1995	-0.37769	-0.45859
1996	-0.37358	-0.46101
1997	-0.36993	-0.46254
1998	-0.36687	-0.46284
1999	-0.36339	-0.46239
2000	-0.36077	-0.46037
2001	-0.35751	-0.45807
2002	-0.35576	-0.45614
2003	-0.35599	-0.45372
[truncated: 3,241 more rows]

## Sheet: Source Data Anoxia
Seconds	WT	ndrg1a -/-
5	-1e-05	-0.00402
6	-0.00154	-0.00456
7	-0.00112	-0.00383
8	-0.00158	-0.00385
9	-0.00124	-0.00417
10	-0.00131	-0.00358
11	-0.00116	-0.00306
12	-0.0014	-0.00377
13	-0.00164	-0.0046
14	-0.00222	-0.00447
15	-0.00211	-0.00507
16	-0.00206	-0.00533
17	-0.00233	-0.00525
18	-0.00244	-0.00509
19	-0.00283	-0.00522
20	-0.00368	-0.00428
21	-0.00429	-0.00346
22	-0.0044	-0.00316
23	-0.00389	-0.00332
24	-0.00339	-0.00278
25	-0.00301	-0.00321
26	-0.00209	-0.00403
27	-0.00128	-0.00442
28	-0.00126	-0.00374
29	-0.00083	-0.00402
30	0.00013	-0.00457
31	0.00038	-0.0043
32	0.00037	-0.00339
33	0.00036	-0.00284
34	-0.0001	-0.00238
35	-0.00013	-0.00191
36	-0.00032	-0.00186
37	-0.00027	-0.00217
38	0.00035	-0.00212
39	0.00092	-0.00251
40	0.00033	-0.00279
41	-3e-05	-0.00267
42	6e-05	-0.00172
43	-0.00015	-0.00124
44	-0.00068	0.00016
45	-8e-05	0.00048
46	0.00029	0.00065
47	-0.0004	-0.00039
48	-0.00064	-0.00153
49	-0.00043	-0.00345
50	-0.00092	-0.0045
51	-0.0012	-0.00401
52	-0.00048	-0.00372
53	-0.0003	-0.00332
54	-0.00083	-0.00213
55	-0.0012	-0.00075
56	-0.00096	-0.00031
57	-0.00061	-0.00046
58	-0.00099	-6e-05
59	-0.00024	0.00042
60	0.00021	0.00021
61	0.00035	-0.00064
62	-0.00073	-0.00022
63	9e-05	-0.00085
64	0.00035	-0.0017
65	0.00026	-0.00105
66	0.00038	-0.00068
67	0.00089	-0.00119
68	7e-05	-0.00074
69	-0.00068	-0.00024
70	-0.00069	-0.00049
71	-0.00058	-0.0005
72	-0.00041	-0.00104
73	-0.00047	-0.00097
74	5e-05	-0.00056
75	-0.00035	-0.00115
76	-0.00101	-0.00144
77	-0.00135	-0.00097
78	-0.00162	-0.00039
79	-0.00154	-0.00085
80	-0.00028	-0.00088
81	-0.00064	-2e-05
82	-0.00041	-0.00023
83	0.00043	-0.00106
84	0.00025	-0.00091
85	-0.00017	-0.0009
86	0.0007	-0.00144
87	0.00075	-0.00103
88	0.00037	-0.0013
89	0.0001	-0.002
90	-0.00044	-0.00251
91	-0.00041	-0.00252
92	-0.00051	-0.00283
93	-1e-05	-0.00327
94	0.00112	-0.00303
95	0.00168	-0.00278
96	0.00092	-0.00311
97	0.00019	-0.00248
98	0.00039	-0.00161
99	0.00055	-0.00152
100	0.00035	-0.00152
101	0.00074	-0.00128
102	0.00107	-0.00121
103	0.00023	-0.00098
104	-0.00061	0.00046
105	-0.00029	0.0006
106	-0.00022	0.00052
107	0.00034	0.00224
108	0.00076	0.00234
109	0.00145	0.00174
110	0.0021	0.00271
111	0.00308	0.00328
112	0.00294	0.00168
113	0.00264	0.0018
114	0.00246	0.00063
115	0.00146	2e-05
116	0.0001	0.0002
117	-0.00011	6e-05
118	0	0.00062
119	-0.00088	0.00247
120	0	0.00343
121	0.00101	0.00373
122	0.00136	0.00407
123	0.00124	0.00373
124	0.0011	0.00278
125	0.00028	0.00143
126	-0.00071	0.0008
127	-0.00105	0.00087
128	-0.00065	0.00061
129	0.00069	0.00031
130	0.00093	0.00045
131	0.00259	0.00061
132	0.00297	-0.00015
133	0.00248	-0.00054
134	0.00171	2e-05
135	0.00106	0.00042
136	-0.00023	0.00071
137	-0.00042	0.00173
138	0.0002	0.00149
139	0.00078	0.00071
140	0.00131	0.00131
141	0.00213	0.00087
142	0.00312	0.00059
143	0.00374	0.00219
144	0.00245	0.00291
145	0.00272	0.00328
146	0.00204	0.00362
147	0.00161	0.00329
148	0.00104	0.00144
149	0.00236	0.00203
150	0.00267	0.00132
151	0.00289	0.0015
152	0.00282	0.00196
153	0.00357	0.00323
154	0.00393	0.0024
155	0.00367	0.00216
156	0.00447	0.00217
157	0.00464	0.00243
158	0.00328	0.00187
159	0.00297	0.00256
160	0.00318	0.00336
161	0.0031	0.00314
162	0.00313	0.00226
163	0.00441	0.00269
164	0.00339	0.00177
165	0.00345	0.001
166	0.00324	0.00073
167	0.00269	0.00072
168	0.00181	0.00055
169	0.00138	0.00066
170	-1e-05	0.00163
171	-0.00062	0.00263
172	-0.00095	0.00313
173	-0.00136	0.00262
174	-0.00135	0.00242
175	-0.00065	0.00257
176	-0.00065	0.00204
177	0.00022	0.0018
178	0.00087	0.0022
179	0.00202	0.00278
180	0.00285	0.0021
181	0.00405	0.0024
182	0.00454	0.00323
183	0.00479	0.00337
184	0.00458	0.00415
185	0.00387	0.0052
186	0.0031	0.00478
187	0.00239	0.00494
188	0.00168	0.00647
189	0.00168	0.00597
190	0.0017	0.00567
191	0.00072	0.00624
192	0.00016	0.00616
193	0.0008	0.0054
194	0.00086	0.00586
195	0.00119	0.00571
196	0.00245	0.00488
197	0.00244	0.00446
198	0.0012	0.00482
199	0.0014	0.00397
200	0.00164	0.00347
201	0.00243	0.00407
202	0.00337	0.00372
203	0.00382	0.00377
204	0.00306	0.00426
205	0.00246	0.00495
206	0.00149	0.00506
207	0.00141	0.00548
208	0.00201	0.00487
209	0.00358	0.00497
210	0.00373	0.00497
211	0.00314	0.00522
212	0.00235	0.00633
213	0.00213	0.00615
214	0.0011	0.00603
215	0.00157	0.00679
216	0.00272	0.00601
217	0.00397	0.00496
218	0.00428	0.00543
219	0.00395	0.00619
220	0.00357	0.00529
221	0.00208	0.00607
222	0.00179	0.00643
223	0.00174	0.00647
224	0.00264	0.00623
225	0.00231	0.00567
226	0.00309	0.00424
227	0.00358	0.00428
228	0.00349	0.00398
229	0.00256	0.00414
230	0.00295	0.00411
231	0.00353	0.00481
232	0.00303	0.00478
233	0.00297	0.00517
234	0.00339	0.00533
235	0.00389	0.00469
236	0.0034	0.00446
237	0.00338	0.00424
238	0.00352	0.00429
239	0.00331	0.00408
240	0.00301	0.00522
241	0.00256	0.00567
242	0.00206	0.00589
243	0.00147	-0.06747
244	0.00086	-0.15314
245	0.00049	-0.19499
246	0.00057	-0.2165
247	0.00078	-0.22764
248	0.00127	-0.15631
249	0.00194	-0.06883
250	-0.05973	-0.02386
251	-0.12913	0.00227
252	-0.16479	0.0187
253	-0.18474	0.02587
254	-0.1958	0.02889
255	-0.14002	0.03218
256	-0.06851	0.0342
257	-0.02536	0.03367
258	0.00044	0.03105
259	0.01866	0.02796
260	0.0329	0.02226
261	0.03881	0.01435
262	0.03752	0.00635
263	0.03574	-0.00051
264	0.03121	-0.00782
265	0.0253	-0.01549
266	0.01751	-0.02127
267	0.00911	-0.02544
268	0.00147	-0.02844
269	-0.00631	-0.02905
270	-0.01558	-0.02776
271	-0.02536	-0.02588
272	-0.03346	-0.02352
273	-0.04028	-0.02088
274	-0.04448	-0.01861
275	-0.04416	-0.01484
276	-0.03991	-0.01046
277	-0.033	-0.00537
278	-0.02482	-0.00075
279	-0.0144	0.00359
280	-0.00429	0.00851
281	0.00664	0.03088
282	0.01679	0.06261
283	0.02734	0.09368
284	0.03679	0.12027
285	0.04665	0.13756
286	0.05513	0.13081
287	0.06171	0.10813
288	0.07692	0.08031
289	0.1066	0.0519
290	0.15175	0.02441
291	0.2034	0.02613
292	0.25104	0.06626
293	0.2872	0.11967
294	0.33467	0.16933
295	0.39315	0.20106
296	0.45518	0.21354
297	0.50264	0.19371
298	0.52087	0.15017
299	0.47929	0.09469
300	0.37104	0.04361
301	0.25903	-0.03102
302	0.17156	-0.12517
303	0.09945	-0.20868
304	0.03627	-0.26009
305	-0.01573	-0.26693
306	-0.10133	-0.24839
307	-0.21742	-0.20856
308	-0.33923	-0.17974
309	-0.45637	-0.19017
310	-0.5603	-0.25545
311	-0.64899	-0.35554
312	-0.72003	-0.48416
313	-0.77863	-0.61918
314	-0.8275	-0.7457
315	-0.84078	-0.8577
316	-0.82694	-0.95136
317	-0.79978	-1.02332
318	-0.76199	-1.07382
319	-0.71489	-1.10633
320	-0.69084	-1.12028
321	-0.6853	-1.11816
322	-0.69034	-1.10507
323	-0.70127	-1.08171
324	-0.71532	-1.04743
325	-0.73058	-1.00534
326	-0.7439	-0.95856
327	-0.75499	-0.90956
328	-0.75321	-0.85215
329	-0.74069	-0.78895
330	-0.72189	-0.72623
331	-0.70121	-0.66758
332	-0.67712	-0.61349
333	-0.66203	-0.5734
334	-0.65598	-0.48072
335	-0.65476	-0.39959
336	-0.56255	-0.36091
337	-0.47115	-0.34222
338	-0.43098	-0.33833
339	-0.41565	-0.4111
340	-0.41332	-0.49003
341	-0.51343	-0.5416
342	-0.62101	-0.58107
343	-0.6824	-0.61253
344	-0.72483	-0.63824
345	-0.75463	-0.65864
346	-0.77535	-0.67053
347	-0.78926	-0.67798
348	-0.79735	-0.68148
349	-0.79618	-0.68157
350	-0.79249	-0.6784
351	-0.78406	-0.67325
352	-0.7719	-0.66681
353	-0.75722	-0.65913
354	-0.74228	-0.6505
355	-0.72641	-0.64103
356	-0.7101	-0.63143
357	-0.69451	-0.62134
358	-0.67934	-0.61084
359	-0.66427	-0.60075
360	-0.65001	-0.59132
361	-0.6376	-0.5832
362	-0.62724	-0.57568
363	-0.61818	-0.56905
364	-0.61122	-0.56198
365	-0.60611	-0.55614
366	-0.60203	-0.55001
367	-0.59885	-0.54489
368	-0.59678	-0.54066
369	-0.5953	-0.53786
370	-0.59404	-0.53438
371	-0.59437	-0.53087
372	-0.59508	-0.52858
373	-0.59638	-0.52527
374	-0.59803	-0.52215
375	-0.59903	-0.51911
376	-0.60003	-0.51674
377	-0.60122	-0.51417
378	-0.60206	-0.51144
379	-0.60342	-0.50826
380	-0.60527	-0.50473
381	-0.60599	-0.50033
382	-0.60503	-0.49519
383	-0.6046	-0.49064
384	-0.60322	-0.48589
385	-0.60245	-0.48186
386	-0.60193	-0.4773
387	-0.60223	-0.47221
388	-0.60158	-0.46737
389	-0.60073	-0.46316
390	-0.59921	-0.45841
391	-0.59799	-0.4541
392	-0.5964	-0.45031
393	-0.59558	-0.44622
394	-0.59477	-0.44127
395	-0.59421	-0.43724
396	-0.59261	-0.43289
397	-0.59072	-0.4286
398	-0.58957	-0.42496
399	-0.58777	-0.4214
400	-0.58589	-0.41642
401	-0.58568	-0.41299
402	-0.58558	-0.40961
403	-0.58396	-0.40577
404	-0.58316	-0.40312
405	-0.58288	-0.40055
406	-0.58143	-0.39797
407	-0.57904	-0.39535
408	-0.57691	-0.3926
409	-0.57587	-0.38883
410	-0.57461	-0.38586
411	-0.57246	-0.38239
412	-0.57128	-0.3788
413	-0.57067	-0.37571
414	-0.56718	-0.37314
415	-0.5628	-0.37068
416	-0.55961	-0.36758
417	-0.55678	-0.36484
418	-0.55321	-0.36285
419	-0.55135	-0.36064
420	-0.54953	-0.35785
421	-0.54734	-0.35548
422	-0.54481	-0.35334
423	-0.54289	-0.35034
424	-0.54032	-0.34747
425	-0.53669	-0.34545
426	-0.53432	-0.34409
427	-0.53144	-0.34253
428	-0.52875	-0.34104
429	-0.52607	-0.34023
430	-0.52404	-0.33869
431	-0.52104	-0.33604
432	-0.51803	-0.33384
433	-0.5154	-0.33168
434	-0.51204	-0.32994
435	-0.509	-0.32749
436	-0.50595	-0.32602
437	-0.5027	-0.32408
438	-0.49877	-0.32263
439	-0.49641	-0.31962
440	-0.49401	-0.31783
441	-0.49192	-0.31622
442	-0.48991	-0.31488
443	-0.48719	-0.31316
444	-0.48406	-0.31263
445	-0.48134	-0.31144
446	-0.4775	-0.31025
447	-0.47512	-0.30897
448	-0.47301	-0.30719
449	-0.47048	-0.30471
450	-0.46837	-0.30403
451	-0.46647	-0.30224
452	-0.46444	-0.30144
453	-0.46268	-0.30017
454	-0.46142	-0.29999
455	-0.45893	-0.29944
456	-0.45661	-0.29841
457	-0.45475	-0.29722
458	-0.45302	-0.29683
459	-0.45118	-0.29594
460	-0.44973	-0.2947
461	-0.44906	-0.2954
462	-0.44646	-0.29467
463	-0.44386	-0.29466
464	-0.44117	-0.29403
465	-0.43968	-0.29307
466	-0.43734	-0.29071
467	-0.43639	-0.28924
468	-0.43601	-0.28756
469	-0.43572	-0.28612
470	-0.43527	-0.28486
471	-0.43468	-0.2846
472	-0.43378	-0.28446
473	-0.43205	-0.28329
474	-0.43112	-0.28311
475	-0.42861	-0.28253
476	-0.4271	-0.28154
477	-0.4259	-0.28065
478	-0.42485	-0.28016
479	-0.42334	-0.27817
480	-0.42285	-0.27654
481	-0.42128	-0.27529
482	-0.41957	-0.27335
483	-0.41805	-0.27198
484	-0.41646	-0.27115
485	-0.41399	-0.27103
486	-0.41306	-0.27056
487	-0.41215	-0.27056
488	-0.411	-0.27013
489	-0.40965	-0.26971
490	-0.40954	-0.26911
491	-0.40856	-0.26893
492	-0.40785	-0.26762
493	-0.40761	-0.26705
494	-0.4073	-0.26751
495	-0.40646	-0.26689
496	-0.40492	-0.26635
497	-0.40316	-0.2668
498	-0.40186	-0.26623
499	-0.40039	-0.26559
500	-0.39875	-0.26575
501	-0.39778	-0.26487
502	-0.39699	-0.26414
503	-0.39531	-0.26314
504	-0.39408	-0.26069
505	-0.39208	-0.25917
506	-0.39097	-0.25878
507	-0.38933	-0.2574
508	-0.38851	-0.25729
509	-0.38728	-0.25704
510	-0.38718	-0.25565
511	-0.38634	-0.25376
512	-0.38549	-0.25341
513	-0.38316	-0.25189
514	-0.3826	-0.25117
515	-0.38137	-0.25155
516	-0.37993	-0.25146
517	-0.3793	-0.25025
518	-0.37991	-0.24966
519	-0.37888	-0.24927
520	-0.37769	-0.24813
521	-0.37743	-0.24816
522	-0.37553	-0.2485
523	-0.37383	-0.24898
524	-0.37325	-0.249
525	-0.37338	-0.24822
526	-0.37193	-0.24787
527	-0.37304	-0.24644
528	-0.37215	-0.24608
529	-0.37011	-0.24529
530	-0.36901	-0.24463
531	-0.36902	-0.24395
532	-0.36691	-0.24363
533	-0.36739	-0.24202
534	-0.36692	-0.24163
535	-0.36672	-0.2417
536	-0.36595	-0.23995
537	-0.36577	-0.23907
538	-0.36468	-0.23849
539	-0.36474	-0.23829
540	-0.36389	-0.23763
541	-0.36387	-0.23785
542	-0.3636	-0.2377
543	-0.36292	-0.23751
544	-0.36186	-0.2372
545	-0.36084	-0.23718
546	-0.35896	-0.23743
547	-0.3574	-0.23689
548	-0.35581	-0.23808
549	-0.35459	-0.23761
550	-0.35423	-0.23667
551	-0.35398	-0.23634
552	-0.35405	-0.23652
553	-0.3539	-0.23472
554	-0.35402	-0.23398
555	-0.35343	-0.23323
556	-0.35235	-0.23242
557	-0.35143	-0.23177
558	-0.351	-0.23098
559	-0.35069	-0.22999
560	-0.34994	-0.23023
561	-0.34965	-0.22886
562	-0.34889	-0.22784
563	-0.34751	-0.22625
564	-0.34626	-0.22603
565	-0.34573	-0.22543
566	-0.34529	-0.22497
567	-0.34463	-0.22543
568	-0.34475	-0.22674
569	-0.34495	-0.22718
570	-0.34358	-0.22687
571	-0.34367	-0.22635
572	-0.34251	-0.22505
573	-0.34081	-0.22426
574	-0.33915	-0.22292
575	-0.3388	-0.22259
576	-0.33759	-0.2229
577	-0.33828	-0.22275
578	-0.33833	-0.22243
579	-0.33863	-0.2224
580	-0.3383	-0.22228
581	-0.33808	-0.22188
582	-0.33664	-0.2214
583	-0.33755	-0.22105
584	-0.33752	-0.22152
585	-0.33661	-0.22079
586	-0.33616	-0.22071
587	-0.33624	-0.22105
588	-0.33486	-0.22062
589	-0.33274	-0.21866
590	-0.33257	-0.2177
591	-0.33157	-0.21732
592	-0.33076	-0.21667
593	-0.33003	-0.21683
594	-0.33028	-0.21664
595	-0.33026	-0.217
596	-0.32897	-0.21664
597	-0.32944	-0.21679
598	-0.32933	-0.21599
599	-0.33	-0.21593
600	-0.33002	-0.21518
601	-0.33091	-0.21423
602	-0.32981	-0.21365
603	-0.32911	-0.2135
604	-0.32697	-0.21288
605	-0.32479	-0.21181
606	-0.32355	-0.21142
607	-0.32276	-0.21046
608	-0.32207	-0.20937
609	-0.32148	-0.20849
610	-0.32184	-0.20795
611	-0.32223	-0.20708
612	-0.32178	-0.20644
613	-0.32133	-0.20554
614	-0.32193	-0.20613
615	-0.3222	-0.20706
616	-0.32061	-0.2085
617	-0.32019	-0.20885
618	-0.31954	-0.20959
619	-0.31851	-0.20879
620	-0.31699	-0.20922
621	-0.31718	-0.20806
622	-0.31682	-0.20743
623	-0.31685	-0.20743
624	-0.31621	-0.20711
625	-0.316	-0.20543
626	-0.3156	-0.20505
627	-0.31526	-0.2051
628	-0.31502	-0.20497
629	-0.31503	-0.2053
630	-0.31463	-0.2048
631	-0.314	-0.20434
632	-0.31367	-0.20358
633	-0.31318	-0.20303
634	-0.31325	-0.20237
635	-0.31257	-0.20271
636	-0.31222	-0.20244
637	-0.31116	-0.20207
638	-0.31075	-0.20116
639	-0.31018	-0.20039
640	-0.31069	-0.19962
641	-0.31087	-0.19891
642	-0.31053	-0.19769
643	-0.3097	-0.19654
644	-0.30853	-0.19627
645	-0.30752	-0.19595
646	-0.30579	-0.19625
647	-0.30499	-0.19782
648	-0.30454	-0.19849
649	-0.3039	-0.19912
650	-0.30278	-0.19917
651	-0.30359	-0.19815
652	-0.30428	-0.19665
653	-0.30397	-0.19671
654	-0.30466	-0.19654
655	-0.30537	-0.19581
656	-0.30518	-0.19614
657	-0.30519	-0.19689
658	-0.3057	-0.19708
659	-0.30502	-0.19602
660	-0.30487	-0.19636
661	-0.30462	-0.19633
662	-0.30406	-0.19562
663	-0.30342	-0.19464
664	-0.30283	-0.19452
665	-0.30281	-0.19377
666	-0.30238	-0.19331
667	-0.30188	-0.19356
668	-0.30154	-0.19357
669	-0.30089	-0.1935
670	-0.30015	-0.19404
671	-0.29996	-0.19377
672	-0.29953	-0.19392
673	-0.29889	-0.19439
674	-0.29848	-0.19509
675	-0.29737	-0.19583
676	-0.29618	-0.19683
677	-0.29475	-0.19704
678	-0.29466	-0.19771
679	-0.29486	-0.19801
680	-0.29437	-0.1974
681	-0.29435	-0.19612
682	-0.29512	-0.19547
683	-0.29509	-0.19443
684	-0.29547	-0.19257
685	-0.29632	-0.19172
686	-0.29596	-0.19244
687	-0.29515	-0.19262
688	-0.29509	-0.19203
689	-0.29534	-0.19259
690	-0.29452	-0.19292
691	-0.29516	-0.19284
692	-0.29469	-0.19199
693	-0.29322	-0.19156
694	-0.29199	-0.19098
695	-0.29145	-0.19099
696	-0.29023	-0.18976
697	-0.29043	-0.1893
698	-0.29074	-0.18798
699	-0.29	-0.18631
700	-0.29048	-0.1831
701	-0.2903	-0.18282
702	-0.29002	-0.18166
703	-0.28986	-0.18187
704	-0.28988	-0.18202
705	-0.28873	-0.18374
706	-0.28803	-0.18289
707	-0.28729	-0.18304
708	-0.28692	-0.18325
709	-0.28687	-0.18402
710	-0.28663	-0.18374
711	-0.28684	-0.18367
712	-0.28748	-0.18395
713	-0.28668	-0.18327
714	-0.28621	-0.18312
715	-0.2869	-0.18282
716	-0.28694	-0.18266
717	-0.28656	-0.18196
718	-0.28672	-0.18201
719	-0.28724	-0.18133
720	-0.28662	-0.18139
721	-0.28636	-0.18126
722	-0.28576	-0.18122
723	-0.28502	-0.18117
724	-0.28358	-0.18014
725	-0.28282	-0.17993
726	-0.28183	-0.18055
727	-0.28266	-0.17891
728	-0.2833	-0.17795
729	-0.28338	-0.17816
730	-0.2838	-0.17804
731	-0.2844	-0.17715
732	-0.2835	-0.17885
733	-0.28344	-0.17977
734	-0.28238	-0.18075
735	-0.28131	-0.17991
736	-0.28021	-0.18006
737	-0.28024	-0.18014
738	-0.28047	-0.17918
739	-0.28064	-0.17792
740	-0.28032	-0.17768
741	-0.27989	-0.17607
742	-0.27813	-0.17374
743	-0.27582	-0.1736
744	-0.27553	-0.17319
745	-0.27521	-0.17267
746	-0.27483	-0.1733
747	-0.27534	-0.17421
748	-0.27559	-0.17481
749	-0.27558	-0.1757
750	-0.27517	-0.17552
751	-0.27511	-0.17551
752	-0.27453	-0.17582
753	-0.2745	-0.17452
754	-0.27442	-0.17407
755	-0.27527	-0.1746
756	-0.2754	-0.17475
757	-0.27473	-0.1746
758	-0.27469	-0.17556
759	-0.27412	-0.17546
760	-0.27362	-0.17464
761	-0.27344	-0.17327
762	-0.27443	-0.17196
763	-0.2751	-0.17088
764	-0.27502	-0.17045
765	-0.27456	-0.16982
766	-0.27421	-0.17042
767	-0.27301	-0.17048
768	-0.2711	-0.17029
769	-0.27092	-0.16988
770	-0.27034	-0.17042
771	-0.27006	-0.17048
772	-0.26994	-0.1708
773	-0.26991	-0.17082
774	-0.26974	-0.17127
775	-0.2691	-0.17101
776	-0.26846	-0.16996
777	-0.26766	-0.1699
778	-0.26777	-0.1697
779	-0.26774	-0.1694
780	-0.26805	-0.1699
781	-0.26786	-0.17037
782	-0.2686	-0.16976
783	-0.26736	-0.16957
784	-0.26631	-0.16907
785	-0.26594	-0.16893
786	-0.26577	-0.16896
787	-0.26495	-0.16912
788	-0.26549	-0.16904
789	-0.2658	-0.16919
790	-0.26546	-0.16867
791	-0.26519	-0.16871
792	-0.26492	-0.16869
793	-0.2648	-0.16876
794	-0.26468	-0.16779
795	-0.26496	-0.16717
796	-0.26549	-0.16646
797	-0.2659	-0.16587
798	-0.26527	-0.16479
799	-0.26494	-0.16472
800	-0.26451	-0.16447
801	-0.26345	-0.16474
802	-0.26324	-0.16563
803	-0.26318	-0.16578
804	-0.26297	-0.16655
805	-0.26274	-0.16609
806	-0.26365	-0.16521
807	-0.26284	-0.16465
808	-0.26312	-0.16482
809	-0.2632	-0.16449
810	-0.26288	-0.1645
811	-0.26196	-0.16437
812	-0.26228	-0.16439
813	-0.26143	-0.16441
814	-0.26135	-0.16345
815	-0.26116	-0.1641
816	-0.2602	-0.16462
817	-0.2596	-0.16422
818	-0.26004	-0.1634
819	-0.25878	-0.16384
820	-0.25796	-0.16367
821	-0.25858	-0.16312
822	-0.25849	-0.16248
823	-0.25767	-0.16253
824	-0.25835	-0.16275
825	-0.25917	-0.16238
826	-0.25862	-0.16185
827	-0.25811	-0.16224
828	-0.258	-0.16251
829	-0.25698	-0.16189
830	-0.25594	-0.16159
831	-0.25545	-0.16184
832	-0.25548	-0.16213
833	-0.25613	-0.16184
834	-0.25679	-0.16119
835	-0.25716	-0.16046
836	-0.25745	-0.15983
837	-0.25716	-0.15873
838	-0.25683	-0.15885
839	-0.25644	-0.15958
840	-0.25606	-0.16006
841	-0.25571	-0.16037
842	-0.25591	-0.15979
843	-0.25502	-0.15906
844	-0.25524	-0.15827
845	-0.25532	-0.15805
846	-0.25536	-0.15792
847	-0.25549	-0.15816
848	-0.25593	-0.15911
849	-0.25524	-0.15943
850	-0.25443	-0.16055
851	-0.25419	-0.1604
852	-0.2527	-0.15999
853	-0.25243	-0.15962
854	-0.25213	-0.15913
855	-0.25259	-0.15799
856	-0.25251	-0.15792
857	-0.25325	-0.15893
858	-0.25298	-0.15867
859	-0.25309	-0.15914
860	-0.25326	-0.15996
861	-0.2537	-0.16091
862	-0.25378	-0.16101
863	-0.25258	-0.16118
864	-0.25256	-0.16105
865	-0.25139	-0.16007
866	-0.25014	-0.16003
867	-0.25001	-0.15969
868	-0.25052	-0.15914
869	-0.24978	-0.1586
870	-0.24953	-0.158
871	-0.24876	-0.1564
872	-0.24841	-0.15527
873	-0.2482	-0.15542
874	-0.24814	-0.15498
875	-0.24832	-0.15421
876	-0.24812	-0.15427
877	-0.24731	-0.15425
878	-0.24718	-0.15286
879	-0.2468	-0.15315
880	-0.24597	-0.15352
881	-0.24689	-0.15262
882	-0.24763	-0.15251
883	-0.24845	-0.15248
884	-0.24894	-0.15202
885	-0.24947	-0.15183
886	-0.24911	-0.15296
887	-0.24816	-0.15285
888	-0.24691	-0.15363
889	-0.24645	-0.15436
890	-0.24684	-0.15505
891	-0.24807	-0.15429
892	-0.24836	-0.15459
893	-0.24759	-0.15427
894	-0.2467	-0.15395
895	-0.24559	-0.15353
896	-0.24381	-0.15388
897	-0.24341	-0.1536
898	-0.24422	-0.15353
899	-0.24533	-0.15259
900	-0.2455	-0.15274
901	-0.24552	-0.15267
902	-0.24571	-0.15271
903	-0.24549	-0.15212
904	-0.24462	-0.15227
905	-0.24401	-0.15047
906	-0.24372	-0.14989
907	-0.24265	-0.1492
908	-0.24168	-0.14915
909	-0.24065	-0.14901
910	-0.24035	-0.15011
911	-0.23986	-0.1498
912	-0.23949	-0.1499
913	-0.23998	-0.14991
914	-0.24047	-0.15016
915	-0.24067	-0.14985
916	-0.24013	-0.1502
917	-0.23996	-0.1499
918	-0.23937	-0.14943
919	-0.23815	-0.14817
920	-0.23813	-0.14829
921	-0.23838	-0.14758
922	-0.2384	-0.1475
923	-0.23848	-0.14754
924	-0.23964	-0.14816
925	-0.23915	-0.14881
926	-0.23913	-0.14976
927	-0.24008	-0.15018
928	-0.24062	-0.15152
929	-0.2401	-0.15242
930	-0.24026	-0.15154
931	-0.24045	-0.15129
932	-0.23959	-0.15076
933	-0.23849	-0.15001
934	-0.23851	-0.14913
935	-0.23861	-0.14962
936	-0.23858	-0.1496
937	-0.23903	-0.15001
938	-0.2398	-0.14971
939	-0.24004	-0.15046
940	-0.23997	-0.14961
941	-0.24069	-0.14908
942	-0.23968	-0.14955
943	-0.23923	-0.14925
944	-0.2381	-0.14854
945	-0.23785	-0.14829
946	-0.23645	-0.14738
947	-0.23673	-0.14624
948	-0.23682	-0.14576
949	-0.23693	-0.14484
950	-0.23669	-0.14495
951	-0.23649	-0.14547
952	-0.2358	-0.14529
953	-0.23461	-0.14573
954	-0.23476	-0.14663
955	-0.23459	-0.14737
956	-0.23425	-0.14838
957	-0.23377	-0.1486
958	-0.23335	-0.14806
959	-0.23313	-0.1466
960	-0.23313	-0.14609
961	-0.23341	-0.1453
962	-0.23355	-0.14505
963	-0.2347	-0.14628
964	-0.23542	-0.14648
965	-0.2343	-0.14605
966	-0.23399	-0.14639
967	-0.23373	-0.14572
968	-0.23303	-0.1451
969	-0.23265	-0.1457
970	-0.23369	-0.14562
971	-0.23411	-0.14512
972	-0.23487	-0.14554
973	-0.23527	-0.14416
974	-0.23464	-0.14288
975	-0.23375	-0.14205
976	-0.23259	-0.14083
977	-0.23244	-0.13954
978	-0.23212	-0.13844
979	-0.23125	-0.1385
980	-0.23139	-0.13887
981	-0.23089	-0.13888
982	-0.23037	-0.13984
983	-0.22993	-0.14136
984	-0.22923	-0.14184
985	-0.22892	-0.14181
986	-0.22894	-0.14189
987	-0.22895	-0.14172
988	-0.22914	-0.14136
989	-0.23022	-0.1407
990	-0.22975	-0.14058
991	-0.22993	-0.14099
992	-0.22979	-0.14191
993	-0.22939	-0.14202
994	-0.22886	-0.14226
995	-0.22914	-0.14229
996	-0.22929	-0.14159
997	-0.22888	-0.14037
998	-0.2294	-0.14133
999	-0.23003	-0.14222
1000	-0.2296	-0.14266
1001	-0.22973	-0.14357
1002	-0.22976	-0.14403
1003	-0.22923	-0.14331
1004	-0.22874	-0.14343
1005	-0.22873	-0.14372
1006	-0.22874	-0.1433
1007	-0.22932	-0.14348
1008	-0.22906	-0.14383
1009	-0.22881	-0.14289
1010	-0.22914	-0.14255
1011	-0.22864	-0.1432
1012	-0.22784	-0.14305
1013	-0.22781	-0.14204
1014	-0.22783	-0.14141
1015	-0.22788	-0.1412
1016	-0.22826	-0.14035
1017	-0.22884	-0.13998
1018	-0.22965	-0.14008
1019	-0.22998	-0.14082
1020	-0.23032	-0.13956
1021	-0.2301	-0.13965
1022	-0.22955	-0.13959
1023	-0.22804	-0.14
1024	-0.22796	-0.14009
1025	-0.22736	-0.14152
1026	-0.22671	-0.14108
1027	-0.22611	-0.14054
1028	-0.22618	-0.14012
1029	-0.22513	-0.13954
1030	-0.22406	-0.13838
1031	-0.22335	-0.13733
1032	-0.22261	-0.13717
1033	-0.22134	-0.13667
1034	-0.22033	-0.13608
1035	-0.21938	-0.13553
1036	-0.21927	-0.13666
1037	-0.21948	-0.13652
1038	-0.22061	-0.1362
1039	-0.22059	-0.13598
1040	-0.22125	-0.13665
1041	-0.22216	-0.13565
1042	-0.22291	-0.13567
1043	-0.22236	-0.13618
1044	-0.22326	-0.1373
1045	-0.22316	-0.13715
1046	-0.222	-0.13784
1047	-0.22097	-0.13751
1048	-0.22077	-0.13701
1049	-0.22069	-0.13651
1050	-0.22098	-0.1362
1051	-0.2211	-0.13589
1052	-0.22089	-0.136
1053	-0.22027	-0.13624
1054	-0.21974	-0.13635
1055	-0.2198	-0.13595
1056	-0.21993	-0.13592
1057	-0.21961	-0.13659
1058	-0.2195	-0.13647
1059	-0.21943	-0.13716
1060	-0.21898	-0.13672
1061	-0.21817	-0.13623
1062	-0.21813	-0.13579
1063	-0.21838	-0.13536
1064	-0.2186	-0.13465
1065	-0.2185	-0.13399
1066	-0.21879	-0.13377
1067	-0.21844	-0.13322
1068	-0.21814	-0.13327
1069	-0.21685	-0.13214
1070	-0.21672	-0.13317
1071	-0.21668	-0.13429
1072	-0.21785	-0.13496
1073	-0.21796	-0.13528
1074	-0.21862	-0.13548
1075	-0.21867	-0.13584
1076	-0.21842	-0.13404
1077	-0.21796	-0.13307
1078	-0.21877	-0.13289
1079	-0.21911	-0.13271
1080	-0.2193	-0.13149
1081	-0.21949	-0.13199
1082	-0.21978	-0.13217
1083	-0.21901	-0.1324
1084	-0.21852	-0.13264
1085	-0.21857	-0.13289
1086	-0.2181	-0.13336
1087	-0.21755	-0.13365
1088	-0.21724	-0.13341
1089	-0.21754	-0.13403
1090	-0.21632	-0.13458
1091	-0.21696	-0.13463
1092	-0.21643	-0.13536
1093	-0.21687	-0.13534
1094	-0.21701	-0.13476
1095	-0.21845	-0.13482
1096	-0.21893	-0.13484
1097	-0.2191	-0.13445
1098	-0.21865	-0.13412
1099	-0.21802	-0.13462
1100	-0.21709	-0.13487
1101	-0.21509	-0.1338
1102	-0.21478	-0.13386
1103	-0.21457	-0.13265
1104	-0.2144	-0.13126
1105	-0.21417	-0.13003
1106	-0.21445	-0.1304
1107	-0.2148	-0.12917
1108	-0.21505	-0.12969
1109	-0.21523	-0.13026
1110	-0.2151	-0.13167
1111	-0.21541	-0.1317
1112	-0.21451	-0.13188
1113	-0.21373	-0.1333
1114	-0.21353	-0.13472
1115	-0.21478	-0.13517
1116	-0.21557	-0.13711
1117	-0.21629	-0.13793
1118	-0.21692	-0.13783
1119	-0.21654	-0.13801
1120	-0.21504	-0.13733
1121	-0.21428	-0.13596
1122	-0.21339	-0.13726
1123	-0.21355	-0.13772
1124	-0.2134	-0.13638
1125	-0.21279	-0.13564
1126	-0.21245	-0.13528
1127	-0.21289	-0.13349
1128	-0.21141	-0.13168
1129	-0.21125	-0.13092
1130	-0.21121	-0.13052
1131	-0.21146	-0.13015
1132	-0.21131	-0.12909
1133	-0.21236	-0.12832
1134	-0.21251	-0.1284
1135	-0.21303	-0.12848
1136	-0.21262	-0.12806
1137	-0.21372	-0.12754
1138	-0.21335	-0.1279
1139	-0.21351	-0.12807
1140	-0.21365	-0.12791
1141	-0.21393	-0.12782
1142	-0.21246	-0.12934
1143	-0.21228	-0.13083
1144	-0.21184	-0.13137
1145	-0.2111	-0.13159
1146	-0.21043	-0.13186
1147	-0.20959	-0.13124
1148	-0.20852	-0.13
1149	-0.20785	-0.129
1150	-0.20793	-0.12877
1151	-0.20762	-0.12942
1152	-0.20813	-0.12959
1153	-0.20888	-0.12956
1154	-0.20943	-0.12998
1155	-0.20969	-0.12949
1156	-0.21038	-0.12838
1157	-0.21087	-0.1282
1158	-0.21131	-0.12821
1159	-0.21168	-0.12875
1160	-0.21098	-0.12951
1161	-0.21057	-0.12967
1162	-0.21069	-0.12935
1163	-0.21014	-0.12909
1164	-0.20963	-0.12783
1165	-0.2094	-0.12658
1166	-0.20901	-0.12591
1167	-0.20801	-0.12556
1168	-0.20757	-0.12541
1169	-0.20682	-0.12598
1170	-0.20738	-0.12666
1171	-0.20702	-0.12702
1172	-0.20751	-0.12682
1173	-0.20776	-0.12597
1174	-0.20824	-0.1253
1175	-0.2076	-0.12565
1176	-0.20836	-0.12611
1177	-0.2082	-0.12655
1178	-0.20745	-0.12745
1179	-0.20777	-0.12773
1180	-0.20748	-0.12711
1181	-0.20717	-0.12604
1182	-0.20639	-0.12504
1183	-0.2062	-0.12411
1184	-0.2056	-0.12413
1185	-0.20666	-0.12386
1186	-0.20578	-0.12431
1187	-0.20623	-0.12479
1188	-0.20657	-0.1245
1189	-0.20727	-0.12338
1190	-0.20672	-0.12327
1191	-0.2066	-0.12266
1192	-0.20688	-0.12231
1193	-0.2069	-0.12283
1194	-0.20629	-0.12255
1195	-0.2061	-0.12218
1196	-0.20696	-0.12322
1197	-0.20707	-0.12378
1198	-0.20704	-0.12382
1199	-0.20669	-0.12484
1200	-0.20665	-0.12538
1201	-0.20716	-0.1246
1202	-0.2064	-0.12429
1203	-0.2059	-0.1236
1204	-0.20539	-0.12306
1205	-0.2055	-0.12262
1206	-0.20475	-0.12122
1207	-0.2045	-0.12073
1208	-0.20479	-0.12125
1209	-0.20494	-0.12168
1210	-0.20422	-0.12203
1211	-0.20381	-0.12404
1212	-0.2036	-0.12427
1213	-0.20308	-0.12384
1214	-0.20302	-0.12405
1215	-0.20295	-0.12317
1216	-0.20309	-0.12276
1217	-0.20376	-0.12205
1218	-0.20479	-0.12189
1219	-0.20483	-0.12095
1220	-0.20547	-0.12111
1221	-0.20513	-0.12035
1222	-0.20518	-0.12074
1223	-0.20514	-0.12033
1224	-0.20594	-0.12035
1225	-0.20608	-0.12055
1226	-0.2069	-0.12063
1227	-0.20729	-0.12085
1228	-0.20696	-0.12183
1229	-0.20656	-0.12196
1230	-0.206	-0.12312
1231	-0.20524	-0.12385
1232	-0.20357	-0.12393
1233	-0.20293	-0.12373
1234	-0.20163	-0.12377
1235	-0.20135	-0.12315
1236	-0.20086	-0.12283
1237	-0.2008	-0.12326
1238	-0.20134	-0.12371
1239	-0.20088	-0.12383
1240	-0.20113	-0.12471
1241	-0.20178	-0.12474
1242	-0.20153	-0.12369
1243	-0.20086	-0.12334
1244	-0.20139	-0.1229
1245	-0.19937	-0.12165
1246	-0.19832	-0.12187
1247	-0.19931	-0.12249
1248	-0.19966	-0.12355
1249	-0.20036	-0.12356
1250	-0.20212	-0.12433
1251	-0.20272	-0.12419
1252	-0.20309	-0.12449
1253	-0.20302	-0.12439
1254	-0.20246	-0.12423
1255	-0.20273	-0.12327
1256	-0.20256	-0.12329
1257	-0.20193	-0.12277
1258	-0.20151	-0.12164
1259	-0.20131	-0.12191
1260	-0.20085	-0.12273
1261	-0.20151	-0.12283
1262	-0.20107	-0.12277
1263	-0.20109	-0.12339
1264	-0.20131	-0.12385
1265	-0.20055	-0.12348
1266	-0.1999	-0.12327
1267	-0.19875	-0.12319
1268	-0.19809	-0.12253
1269	-0.19799	-0.12218
1270	-0.19866	-0.12214
1271	-0.19764	-0.12119
1272	-0.19807	-0.12065
1273	-0.19895	-0.12074
1274	-0.1987	-0.12151
1275	-0.19826	-0.12143
1276	-0.19874	-0.12203
1277	-0.19958	-0.12092
1278	-0.19906	-0.11964
1279	-0.19908	-0.11813
1280	-0.19944	-0.11743
1281	-0.19976	-0.11709
1282	-0.1996	-0.11857
1283	-0.1996	-0.11909
1284	-0.20035	-0.11944
1285	-0.2002	-0.1199
1286	-0.20039	-0.12017
1287	-0.20073	-0.12005
1288	-0.20113	-0.12013
1289	-0.20053	-0.12012
1290	-0.19992	-0.12021
1291	-0.19923	-0.1208
1292	-0.19874	-0.12179
1293	-0.19805	-0.12245
1294	-0.19676	-0.12306
1295	-0.19632	-0.12276
1296	-0.19641	-0.12197
1297	-0.19601	-0.12071
1298	-0.19603	-0.12051
1299	-0.19685	-0.11989
1300	-0.19763	-0.12021
1301	-0.19716	-0.12038
1302	-0.19742	-0.12079
1303	-0.19743	-0.12019
1304	-0.19746	-0.11995
1305	-0.19703	-0.11912
1306	-0.19737	-0.11842
1307	-0.19687	-0.11824
1308	-0.19668	-0.11841
1309	-0.1963	-0.11796
1310	-0.19655	-0.1177
1311	-0.19691	-0.11789
1312	-0.1967	-0.11743
1313	-0.19664	-0.11789
1314	-0.19664	-0.11914
1315	-0.19646	-0.12012
1316	-0.19562	-0.12094
1317	-0.19517	-0.12131
1318	-0.19507	-0.12133
1319	-0.19533	-0.12128
1320	-0.1954	-0.12063
1321	-0.19555	-0.11949
1322	-0.19646	-0.1197
1323	-0.19726	-0.11899
1324	-0.19755	-0.11808
1325	-0.19767	-0.1179
1326	-0.198	-0.11756
1327	-0.19785	-0.11804
1328	-0.19752	-0.11812
1329	-0.1975	-0.11809
1330	-0.19686	-0.11771
1331	-0.1961	-0.11865
1332	-0.19568	-0.11833
1333	-0.19538	-0.11894
1334	-0.19444	-0.11883
1335	-0.19402	-0.11865
1336	-0.19436	-0.11854
1337	-0.19399	-0.11842
1338	-0.19418	-0.11833
1339	-0.19458	-0.1177
1340	-0.19512	-0.1183
1341	-0.19571	-0.11756
1342	-0.196	-0.11693
1343	-0.19497	-0.11596
1344	-0.19464	-0.11698
1345	-0.1951	-0.11711
1346	-0.19502	-0.11779
1347	-0.19537	-0.11852
1348	-0.19596	-0.11937
1349	-0.19652	-0.11915
1350	-0.1959	-0.11911
1351	-0.19539	-0.11904
1352	-0.19422	-0.118
1353	-0.19308	-0.11693
1354	-0.19196	-0.11672
1355	-0.19172	-0.11703
1356	-0.19172	-0.11676
1357	-0.19212	-0.11795
1358	-0.19241	-0.11774
1359	-0.19316	-0.11749
1360	-0.19332	-0.117
1361	-0.19208	-0.11801
1362	-0.19198	-0.11818
1363	-0.19217	-0.11949
1364	-0.19214	-0.12042
1365	-0.19147	-0.12174
1366	-0.19179	-0.12172
1367	-0.19228	-0.12008
1368	-0.19269	-0.11995
1369	-0.19259	-0.11958
1370	-0.19321	-0.11848
1371	-0.19367	-0.1173
1372	-0.19334	-0.118
1373	-0.19296	-0.11715
1374	-0.19246	-0.11679
1375	-0.19285	-0.11676
1376	-0.19245	-0.11606
1377	-0.1927	-0.11604
1378	-0.19256	-0.11619
1379	-0.19315	-0.11602
1380	-0.19261	-0.11532
1381	-0.19227	-0.11679
1382	-0.19241	-0.11704
1383	-0.19217	-0.11705
1384	-0.19202	-0.11787
1385	-0.19102	-0.11749
1386	-0.19129	-0.11664
1387	-0.19115	-0.11599
1388	-0.19131	-0.11623
1389	-0.19133	-0.11544
1390	-0.19198	-0.11652
1391	-0.19186	-0.11687
1392	-0.19179	-0.11759
1393	-0.19144	-0.11876
1394	-0.1914	-0.12032
1395	-0.1915	-0.12071
1396	-0.1925	-0.12072
1397	-0.19196	-0.12035
1398	-0.19188	-0.11943
1399	-0.19192	-0.11831
1400	-0.19169	-0.11821
1401	-0.19072	-0.11878
1402	-0.19097	-0.11843
1403	-0.19029	-0.11851
1404	-0.19021	-0.11797
1405	-0.19078	-0.11745
1406	-0.19115	-0.1162
1407	-0.19071	-0.11661
1408	-0.19112	-0.11665
1409	-0.1905	-0.11692
1410	-0.19009	-0.11642
1411	-0.1901	-0.11634
1412	-0.19009	-0.1152
1413	-0.1899	-0.11452
1414	-0.18967	-0.11423
1415	-0.18952	-0.11388
1416	-0.18946	-0.11416
1417	-0.18981	-0.11462
1418	-0.19016	-0.11462
1419	-0.18977	-0.11504
1420	-0.18895	-0.11555
1421	-0.18847	-0.11568
1422	-0.1889	-0.11569
1423	-0.18917	-0.1156
1424	-0.18976	-0.11514
1425	-0.18968	-0.11488
1426	-0.1898	-0.11524
1427	-0.18933	-0.11583
1428	-0.1893	-0.11589
1429	-0.18892	-0.11586
1430	-0.18909	-0.11573
1431	-0.18831	-0.11564
1432	-0.18838	-0.11535
1433	-0.18788	-0.11524
1434	-0.1881	-0.11559
1435	-0.18867	-0.11638
1436	-0.18933	-0.11565
1437	-0.18811	-0.11602
1438	-0.18801	-0.11671
1439	-0.18779	-0.11738
1440	-0.18751	-0.11767
1441	-0.18688	-0.1181
1442	-0.1873	-0.11732
1443	-0.18786	-0.11728
1444	-0.18756	-0.11701
1445	-0.18782	-0.11602
1446	-0.18784	-0.11569
1447	-0.18745	-0.11601
1448	-0.18762	-0.11576
1449	-0.18797	-0.1145
1450	-0.18825	-0.11432
1451	-0.1887	-0.11457
1452	-0.18946	-0.11486
1453	-0.1888	-0.11375
1454	-0.18938	-0.11411
1455	-0.18878	-0.11482
1456	-0.18865	-0.11456
1457	-0.18774	-0.11398
1458	-0.1883	-0.11423
1459	-0.18827	-0.11398
1460	-0.18849	-0.11255
1461	-0.18818	-0.11225
1462	-0.18823	-0.11192
1463	-0.18711	-0.11204
1464	-0.18662	-0.1115
1465	-0.186	-0.11221
1466	-0.18627	-0.11177
1467	-0.18612	-0.1125
1468	-0.1857	-0.11267
1469	-0.18441	-0.11371
1470	-0.18351	-0.1136
1471	-0.18343	-0.11445
1472	-0.18466	-0.11371
1473	-0.18491	-0.1137
1474	-0.18601	-0.11251
1475	-0.18761	-0.11224
1476	-0.18793	-0.11181
1477	-0.1872	-0.11171
1478	-0.18792	-0.11191
1479	-0.18746	-0.1124
1480	-0.18639	-0.11207
1481	-0.18572	-0.11145
1482	-0.18581	-0.11144
1483	-0.18475	-0.11016
1484	-0.18452	-0.11009
1485	-0.1851	-0.11093
1486	-0.18554	-0.1113
1487	-0.18484	-0.11152
1488	-0.18497	-0.11261
1489	-0.18519	-0.11269
1490	-0.1844	-0.11306
1491	-0.1841	-0.1131
1492	-0.18397	-0.11329
1493	-0.18478	-0.11271
1494	-0.1845	-0.11324
1495	-0.18593	-0.11266
1496	-0.18571	-0.11274
1497	-0.18562	-0.11168
1498	-0.18558	-0.11084
1499	-0.18572	-0.11017
1500	-0.18463	-0.10996
1501	-0.18468	-0.11062
1502	-0.18452	-0.11142
1503	-0.1846	-0.11178
1504	-0.18419	-0.11182
1505	-0.1846	-0.11168
1506	-0.18474	-0.11109
1507	-0.18528	-0.11112
1508	-0.18498	-0.11149
1509	-0.18505	-0.1113
1510	-0.18403	-0.11093
1511	-0.18317	-0.11138
1512	-0.18278	-0.11184
1513	-0.18283	-0.11183
1514	-0.18233	-0.11174
1515	-0.18247	-0.11139
1516	-0.18292	-0.11037
1517	-0.18344	-0.10934
1518	-0.18291	-0.10988
1519	-0.184	-0.11043
1520	-0.18475	-0.1108
1521	-0.18522	-0.1101
1522	-0.1852	-0.11013
1523	-0.18511	-0.10888
1524	-0.18483	-0.1083
1525	-0.18419	-0.10931
1526	-0.18313	-0.11066
1527	-0.18307	-0.11181
1528	-0.1834	-0.11299
1529	-0.18274	-0.11317
1530	-0.18178	-0.11258
1531	-0.18251	-0.11186
1532	-0.1824	-0.11075
1533	-0.1821	-0.11018
1534	-0.18221	-0.10938
1535	-0.18318	-0.10974
1536	-0.18216	-0.11005
1537	-0.18143	-0.10958
1538	-0.1803	-0.109
1539	-0.18056	-0.10929
1540	-0.18037	-0.10818
1541	-0.18036	-0.10764
1542	-0.1807	-0.10784
1543	-0.18166	-0.10814
1544	-0.18177	-0.10807
1545	-0.18185	-0.10855
1546	-0.18254	-0.10863
1547	-0.1833	-0.10909
1548	-0.18393	-0.10913
1549	-0.18422	-0.10977
1550	-0.18416	-0.10845
1551	-0.18454	-0.10818
1552	-0.18394	-0.10755
1553	-0.18365	-0.10788
1554	-0.18285	-0.10782
1555	-0.18263	-0.10812
1556	-0.18212	-0.10806
1557	-0.18175	-0.10865
1558	-0.18104	-0.10865
1559	-0.18084	-0.10864
1560	-0.18079	-0.10971
1561	-0.17992	-0.11039
1562	-0.17966	-0.11148
1563	-0.1788	-0.11121
1564	-0.17862	-0.11124
1565	-0.17811	-0.11102
1566	-0.17898	-0.11117
1567	-0.18001	-0.1093
1568	-0.18088	-0.10874
1569	-0.18219	-0.10759
1570	-0.18235	-0.10776
1571	-0.182	-0.10755
1572	-0.1814	-0.10747
1573	-0.18213	-0.10824
1574	-0.1819	-0.10819
1575	-0.18221	-0.10753
1576	-0.18189	-0.1078
1577	-0.18151	-0.10792
1578	-0.18043	-0.10752
1579	-0.18062	-0.10781
1580	-0.17953	-0.10813
1581	-0.17989	-0.10672
1582	-0.18027	-0.10632
1583	-0.18034	-0.10609
1584	-0.17945	-0.10641
1585	-0.1803	-0.106
1586	-0.18036	-0.10666
1587	-0.17965	-0.10796
1588	-0.17867	-0.10822
1589	-0.17815	-0.10802
1590	-0.17777	-0.10858
1591	-0.17716	-0.10909
1592	-0.177	-0.10918
1593	-0.1777	-0.10997
1594	-0.17829	-0.11116
1595	-0.17869	-0.11079
1596	-0.17903	-0.11032
1597	-0.18023	-0.1101
1598	-0.18114	-0.10949
1599	-0.18161	-0.10864
1600	-0.18222	-0.10852
1601	-0.18235	-0.10854
1602	-0.18135	-0.10788
1603	-0.18113	-0.10727
1604	-0.18023	-0.10728
1605	-0.17967	-0.10775
1606	-0.17981	-0.10706
1607	-0.17932	-0.1073
1608	-0.17941	-0.10775
1609	-0.17904	-0.10698
1610	-0.17825	-0.10599
1611	-0.17785	-0.10666
1612	-0.17801	-0.10707
1613	-0.17744	-0.10708
1614	-0.17797	-0.10739
1615	-0.17771	-0.1082
1616	-0.17765	-0.109
1617	-0.17793	-0.10831
1618	-0.17803	-0.10786
1619	-0.17796	-0.10797
1620	-0.17941	-0.10791
1621	-0.18013	-0.10691
1622	-0.18056	-0.10671
1623	-0.17993	-0.10705
1624	-0.17973	-0.1067
1625	-0.17975	-0.10595
1626	-0.17987	-0.10641
1627	-0.17883	-0.10728
1628	-0.17957	-0.10728
1629	-0.17927	-0.10755
1630	-0.17801	-0.10841
1631	-0.17685	-0.10852
1632	-0.17692	-0.10729
1633	-0.17663	-0.10751
1634	-0.17674	-0.10754
1635	-0.17737	-0.10658
1636	-0.17787	-0.10636
1637	-0.17795	-0.10643
1638	-0.178	-0.10554
1639	-0.17777	-0.10557
1640	-0.17791	-0.10612
1641	-0.17761	-0.10621
1642	-0.17744	-0.10683
1643	-0.17659	-0.10706
1644	-0.1765	-0.10737
1645	-0.1758	-0.10698
1646	-0.17585	-0.10682
1647	-0.17699	-0.10651
1648	-0.1777	-0.10604
1649	-0.17753	-0.10496
1650	-0.17805	-0.10584
1651	-0.1773	-0.10599
1652	-0.17637	-0.10595
1653	-0.17643	-0.10646
1654	-0.17671	-0.10643
1655	-0.17661	-0.10556
1656	-0.17718	-0.10525
1657	-0.17716	-0.10536
1658	-0.17741	-0.10596
1659	-0.17802	-0.10649
1660	-0.17863	-0.10759
1661	-0.17874	-0.10751
1662	-0.17952	-0.10748
1663	-0.1785	-0.10774
1664	-0.17747	-0.10773
1665	-0.17612	-0.10662
1666	-0.17568	-0.10635
1667	-0.17487	-0.10658
1668	-0.17502	-0.10582
1669	-0.17502	-0.10619
1670	-0.17523	-0.10738
1671	-0.17576	-0.1082
1672	-0.17566	-0.10762
1673	-0.17532	-0.10692
1674	-0.17516	-0.10662
1675	-0.17525	-0.10553
1676	-0.17424	-0.10447
1677	-0.17396	-0.10424
1678	-0.1745	-0.10515
1679	-0.17482	-0.10478
1680	-0.17512	-0.10515
1681	-0.17617	-0.10538
1682	-0.17564	-0.10544
1683	-0.17643	-0.10509
1684	-0.17712	-0.1051
1685	-0.177	-0.10481
1686	-0.17608	-0.10583
1687	-0.17637	-0.10723
1688	-0.17564	-0.10774
1689	-0.1753	-0.10822
1690	-0.17462	-0.10857
1691	-0.17474	-0.10832
1692	-0.17527	-0.10665
1693	-0.17456	-0.10525
1694	-0.17409	-0.10465
1695	-0.17486	-0.10418
1696	-0.17597	-0.10305
1697	-0.17619	-0.10337
1698	-0.17745	-0.10426
1699	-0.17808	-0.10443
1700	-0.17781	-0.10407
1701	-0.17677	-0.10498
1702	-0.17629	-0.10523
1703	-0.17512	-0.10466
1704	-0.17415	-0.10413
1705	-0.17362	-0.10362
1706	-0.17318	-0.10212
1707	-0.17223	-0.10104
1708	-0.17258	-0.10081
1709	-0.17279	-0.10147
1710	-0.17357	-0.10301
1711	-0.1736	-0.10355
1712	-0.17439	-0.10466
1713	-0.17497	-0.10536
1714	-0.17533	-0.10542
1715	-0.17498	-0.10551
1716	-0.17559	-0.10577
1717	-0.17537	-0.10563
1718	-0.1751	-0.10567
1719	-0.17522	-0.10576
1720	-0.17476	-0.10532
1721	-0.17443	-0.10555
1722	-0.17388	-0.10565
1723	-0.17322	-0.10611
1724	-0.17195	-0.10625
1725	-0.17174	-0.10583
1726	-0.17115	-0.10556
1727	-0.17109	-0.10547
1728	-0.17085	-0.104
1729	-0.17136	-0.10421
1730	-0.17122	-0.10405
1731	-0.17181	-0.10481
1732	-0.17293	-0.10523
1733	-0.17275	-0.10599
1734	-0.17254	-0.10558
1735	-0.17303	-0.106
1736	-0.1725	-0.10618
1737	-0.1716	-0.10587
1738	-0.17154	-0.1065
1739	-0.1705	-0.1061
1740	-0.16982	-0.10576
1741	-0.17023	-0.10438
1742	-0.17073	-0.10428
1743	-0.17068	-0.10292
1744	-0.17204	-0.10294
1745	-0.17267	-0.10369
1746	-0.17235	-0.10489
1747	-0.17185	-0.1046
1748	-0.17245	-0.10541
1749	-0.1732	-0.10555
1750	-0.17245	-0.10486
1751	-0.1725	-0.1041
1752	-0.17279	-0.10371
1753	-0.17252	-0.10295
1754	-0.17148	-0.1032
1755	-0.17253	-0.10297
1756	-0.17281	-0.10187
1757	-0.17253	-0.10238
1758	-0.17268	-0.10294
1759	-0.173	-0.1022
1760	-0.17238	-0.1021
1761	-0.1724	-0.10325
1762	-0.173	-0.10321
1763	-0.17332	-0.10278
1764	-0.17349	-0.10292
1765	-0.17405	-0.10249
1766	-0.17445	-0.10174
1767	-0.17454	-0.10139
1768	-0.17328	-0.10182
1769	-0.17217	-0.10237
1770	-0.17129	-0.10272
1771	-0.17075	-0.10284
1772	-0.17009	-0.10292
1773	-0.17028	-0.10264
1774	-0.17057	-0.10186
1775	-0.17124	-0.10249
1776	-0.17131	-0.10282
1777	-0.17099	-0.10284
1778	-0.17138	-0.10286
1779	-0.17159	-0.10294
1780	-0.17098	-0.10312
1781	-0.17073	-0.10301
1782	-0.17071	-0.1027
1783	-0.17006	-0.10294
1784	-0.16917	-0.10209
1785	-0.16977	-0.10018
1786	-0.16982	-0.10013
1787	-0.16971	-0.10054
1788	-0.16942	-0.10044
1789	-0.1703	-0.10135
1790	-0.17032	-0.10194
1791	-0.17012	-0.10109
1792	-0.17007	-0.10004
1793	-0.17152	-0.09969
1794	-0.17136	-0.09975
1795	-0.17139	-0.09985
1796	-0.17181	-0.1
1797	-0.17265	-0.10078
1798	-0.1716	-0.10176
1799	-0.17175	-0.10212
1800	-0.17078	-0.10192
1801	-0.17061	-0.10261
1802	-0.17007	-0.10264
1803	-0.1706	-0.10207
1804	-0.1704	-0.10173
1805	-0.1711	-0.1019
1806	-0.17124	-0.10264
1807	-0.1708	-0.10258
1808	-0.17056	-0.10155
1809	-0.17072	-0.10181
1810	-0.1707	-0.10239
1811	-0.16981	-0.10162
1812	-0.17058	-0.10172
1813	-0.17126	-0.10244
1814	-0.17165	-0.10214
1815	-0.17099	-0.10224
1816	-0.17097	-0.10233
1817	-0.17053	-0.10107
1818	-0.17065	-0.10088
1819	-0.16927	-0.10059
1820	-0.16926	-0.10025
1821	-0.16927	-0.10034
1822	-0.16964	-0.10076
1823	-0.16906	-0.10014
1824	-0.17018	-0.10001
1825	-0.17038	-0.10057
1826	-0.17208	-0.10045
1827	-0.17227	-0.10179
1828	-0.17238	-0.1025
1829	-0.17212	-0.10374
1830	-0.17255	-0.10425
1831	-0.1715	-0.10439
1832	-0.17092	-0.10371
1833	-0.17184	-0.1031
1834	-0.17133	-0.10179
1835	-0.17046	-0.1003
1836	-0.17005	-0.10024
1837	-0.17034	-0.09975
1838	-0.1691	-0.10026
1839	-0.16934	-0.10017
1840	-0.16872	-0.10073
1841	-0.16743	-0.10101
1842	-0.16696	-0.10115
1843	-0.167	-0.10124
1844	-0.16716	-0.10135
1845	-0.16829	-0.10137
1846	-0.16949	-0.10031
1847	-0.16929	-0.09938
1848	-0.16906	-0.09913
1849	-0.16914	-0.09883
1850	-0.16955	-0.09868
1851	-0.17046	-0.09954
1852	-0.17073	-0.10032
1853	-0.17081	-0.09984
1854	-0.17092	-0.09971
1855	-0.17074	-0.09987
1856	-0.16964	-0.09889
1857	-0.16897	-0.0991
1858	-0.16799	-0.09944
1859	-0.16713	-0.10017
1860	-0.16699	-0.10069
1861	-0.16651	-0.10034
1862	-0.16645	-0.10012
1863	-0.16751	-0.09998
1864	-0.1693	-0.10034
1865	-0.16909	-0.10087
1866	-0.16942	-0.1021
1867	-0.16925	-0.10206
1868	-0.16898	-0.10211
1869	-0.16739	-0.10258
1870	-0.16726	-0.10142
1871	-0.16737	-0.10179
1872	-0.16884	-0.10249
1873	-0.16866	-0.10282
1874	-0.16882	-0.10141
1875	-0.16831	-0.10028
1876	-0.16778	-0.09957
1877	-0.1662	-0.09964
1878	-0.16716	-0.09908
1879	-0.16753	-0.09937
1880	-0.1682	-0.09969
1881	-0.16834	-0.09937
1882	-0.16913	-0.09826
1883	-0.16815	-0.09819
1884	-0.16765	-0.09806
1885	-0.16708	-0.09874
1886	-0.16705	-0.09895
1887	-0.16688	-0.09956
1888	-0.16668	-0.09971
1889	-0.1661	-0.09936
1890	-0.16641	-0.09905
1891	-0.16675	-0.09887
1892	-0.16633	-0.09898
1893	-0.16691	-0.0988
1894	-0.16766	-0.09889
1895	-0.1686	-0.09877
1896	-0.16878	-0.09918
1897	-0.16888	-0.09952
1898	-0.16938	-0.09937
1899	-0.16931	-0.09897
1900	-0.16874	-0.09838
1901	-0.16868	-0.09734
1902	-0.16839	-0.09661
1903	-0.16716	-0.09713
1904	-0.16724	-0.0974
1905	-0.16618	-0.09721
1906	-0.16599	-0.09676
1907	-0.16676	-0.09643
1908	-0.16662	-0.09602
1909	-0.16571	-0.09557
1910	-0.16523	-0.09553
1911	-0.16446	-0.09649
1912	-0.16317	-0.0969
1913	-0.1633	-0.09702
1914	-0.16276	-0.09744
1915	-0.16328	-0.09793
1916	-0.1633	-0.09849
1917	-0.16411	-0.09787
1918	-0.16425	-0.09747
1919	-0.16589	-0.09785
1920	-0.16552	-0.09816
1921	-0.1658	-0.09809
1922	-0.16574	-0.09899
1923	-0.16597	-0.09969
1924	-0.16488	-0.0999
1925	-0.1662	-0.09964
1926	-0.16641	-0.09843
1927	-0.16591	-0.09775
1928	-0.16517	-0.09702
1929	-0.16631	-0.09649
1930	-0.1648	-0.09606
1931	-0.1643	-0.09685
1932	-0.16532	-0.09653
1933	-0.1655	-0.09585
1934	-0.16509	-0.09487
1935	-0.16609	-0.09468
1936	-0.16704	-0.09412
1937	-0.16702	-0.09389
1938	-0.16779	-0.09474
1939	-0.16804	-0.09551
1940	-0.16714	-0.09526
1941	-0.16634	-0.09567
1942	-0.16555	-0.09661
1943	-0.16501	-0.09645
1944	-0.16308	-0.09575
1945	-0.16296	-0.09669
1946	-0.16327	-0.09641
1947	-0.16317	-0.09592
1948	-0.16224	-0.09618
1949	-0.16303	-0.09654
1950	-0.16322	-0.09558
1951	-0.16351	-0.09518
1952	-0.16334	-0.09444
1953	-0.16311	-0.09456
1954	-0.16271	-0.09401
1955	-0.16273	-0.09492
1956	-0.16105	-0.09494
1957	-0.16173	-0.09574
1958	-0.1634	-0.09522
1959	-0.16408	-0.09637
1960	-0.16372	-0.09675
1961	-0.16464	-0.09814
1962	-0.16346	-0.0985
1963	-0.16221	-0.09949
1964	-0.1618	-0.10033
1965	-0.16133	-0.09987
1966	-0.16103	-0.09943
1967	-0.16179	-0.09909
1968	-0.16205	-0.09854
1969	-0.16152	-0.09742
1970	-0.16167	-0.09731
1971	-0.16185	-0.09655
1972	-0.16209	-0.0961
1973	-0.16174	-0.09635
1974	-0.16174	-0.09553
1975	-0.1628	-0.09557
1976	-0.16298	-0.09584
1977	-0.16261	-0.09602
1978	-0.16322	-0.09674
1979	-0.16459	-0.09832
1980	-0.16414	-0.09844
1981	-0.16412	-0.0984
1982	-0.16377	-0.09912
1983	-0.16335	-0.09883
1984	-0.16243	-0.0988
1985	-0.16124	-0.09828
1986	-0.16022	-0.09798
1987	-0.16051	-0.09736
1988	-0.15978	-0.09678
1989	-0.15941	-0.09617
1990	-0.16034	-0.09591
1991	-0.16125	-0.09541
1992	-0.16179	-0.09602
1993	-0.16239	-0.09517
1994	-0.16334	-0.09462
1995	-0.16387	-0.09465
1996	-0.16422	-0.09497
1997	-0.16396	-0.09409
1998	-0.16486	-0.09523
1999	-0.16475	-0.09607
2000	-0.16434	-0.09714
2001	-0.16405	-0.09751
2002	-0.16405	-0.09764
2003	-0.16316	-0.0972
[truncated: 3,241 more rows]

## Sheet: Source Data Comparison
	Normoxia			Anoxia
WT	-0.358868	-0.195961	-0.29792	-0.1475	-0.130837	-0.18888
ndrg1a -/-	-0.246756	-0.228236	-0.25598	-0.07132	-0.07567	-0.07819

## Sheet: ANOVA results
Table Analyzed	BY GENOTYPE All n=3 normoxia and anoxia DP value comparison
Two-way ANOVA	Ordinary
Alpha	0.05
Source of Variation	% of total variation	P value	P value summary	Significant?
Interaction	1.279	0.4566	ns	No
Row Factor	11.71	0.0455	*	Yes
Column Factor	70.28	0.0004	***	Yes
ANOVA table	SS	DF	MS	F (DFn, DFd)	P value
Interaction	0.001205	1	0.001205	F (1, 8) = 0.6118	P=0.4566
Row Factor	0.01103	1	0.01103	F (1, 8) = 5.599	P=0.0455
Column Factor	0.0662	1	0.0662	F (1, 8) = 33.61	P=0.0004
Residual	0.01576	8	0.00197
Difference between column means
Mean of Normoxia	-0.264
Mean of Anoxia	-0.1154
Difference between means	-0.1486
SE of difference	0.02563
95% CI of difference	-0.2076 to -0.08946
Difference between row means
Mean of WT	-0.22
Mean of ndrg1a -/-	-0.1594
Difference between means	-0.06064
SE of difference	0.02563
95% CI of difference	-0.1197 to -0.001544
Interaction CI
Mean diff, A1 - B1	-0.1285
Mean diff, A2 - B2	-0.1686
(A1 -B1) - (A2 - B2)	0.04009
95% CI of difference	-0.07810 to 0.1583
(B1 - A1) - (B2 - A2)	-0.04009
95% CI of difference	-0.1583 to 0.07810
Data summary
Number of columns (Column Factor)	2
Number of rows (Row Factor)	2
Number of values	12

## Sheet: Multiple comparisons
Compare cell means regardless of rows and columns
Number of families	1
Number of comparisons per family	6
Alpha	0.05
Tukey's multiple comparisons test	Mean Diff.	95.00% CI of diff.	Below threshold?	Summary	Adjusted P Value
WT:Normoxia vs. WT:Anoxia	-0.1285	-0.2446 to -0.01246	Yes	*	0.0309
WT:Normoxia vs. ndrg1a -/-:Normoxia	-0.04059	-0.1566 to 0.07546	No	ns	0.6883
WT:Normoxia vs. ndrg1a -/-:Anoxia	-0.2092	-0.3252 to -0.09314	Yes	**	0.0019
WT:Anoxia vs. ndrg1a -/-:Normoxia	0.08792	-0.02813 to 0.2040	No	ns	0.1489
WT:Anoxia vs. ndrg1a -/-:Anoxia	-0.08068	-0.1967 to 0.03537	No	ns	0.1957
ndrg1a -/-:Normoxia vs. ndrg1a -/-:Anoxia	-0.1686	-0.2846 to -0.05255	Yes	**	0.0071
Test details	Mean 1	Mean 2	Mean Diff.	SE of diff.	N1	N2	q	DF
WT:Normoxia vs. WT:Anoxia	-0.2842	-0.1557	-0.1285	0.03624	3	3	5.015	8
WT:Normoxia vs. ndrg1a -/-:Normoxia	-0.2842	-0.2437	-0.04059	0.03624	3	3	1.584	8
WT:Normoxia vs. ndrg1a -/-:Anoxia	-0.2842	-0.07506	-0.2092	0.03624	3	3	8.163	8
WT:Anoxia vs. ndrg1a -/-:Normoxia	-0.1557	-0.2437	0.08792	0.03624	3	3	3.431	8
WT:Anoxia vs. ndrg1a -/-:Anoxia	-0.1557	-0.07506	-0.08068	0.03624	3	3	3.148	8
ndrg1a -/-:Normoxia vs. ndrg1a -/-:Anoxia	-0.2437	-0.07506	-0.1686	0.03624	3	3	6.579	8
