# Supplementary material for: N-myc downstream regulated gene 1 (ndrg1) functions as a molecular switch for cellular adaptation to hypoxia
Source: eLife journal article supplement (doi:10.7554/elife.74031), 2022-09-16
Supplement: fig6-data1 [file Figure 6-Source Data 1.xlsx]

## Sheet: Figure 6A
m/z	Avg. anoxia 5hpf	Avg. Nomoxia 5hpf	SD, anoxia 5 hpf	SD, nomixia 5hpf
61.9886	1845844	1.9173e+06	37660.5	662412
78.9591	7.00737e+06	6851351	1.17061e+06	1.57158e+06
79.9571	840800	184944	124006	22532.1
80.9648	79062	57648.3	11098.7	23485.3
85.0292	2553241	2044544	12982.5	203228
87.0085	3923265	3.24415e+06	88408.1	220967
89.0241	2703730	767893	52502.7	80737.9
96.96	1.3668e+07	2.56664e+06	1.9723e+06	60113.5
99.9252	235367	321288	78474.7	75263.3
103.039	546807	395065	16154.6	256662
111.008	7.70992e+06	6.06759e+06	975996	317209
112.985	3.26978e+06	3969928	456976	435140
116.928	824571	1.32619e+06	257045	533063
129.018	1593227	1.29164e+06	97865	219261
130.992	258793	477218	#DIV/0!	174609
134.894	1.47744e+06	1292002	139530	455073
135.044	3775183	6.54014e+06	999932	2.28665e+06
163.06	1.13686e+06	1915267	345463	1.00247e+06
172.097	1994445	1.52553e+06	58745	216246
179.054	123864	225366	#DIV/0!	44603.6
181.07	5.91395e+06	5610256	1.03612e+06	330712
182.074	427533	392223	112543	17003.9
191.018	1.72244e+07	1.35012e+07	2.35063e+06	420152
203.055	3.75822e+06	2.7527e+06	1.24949e+06	582706
219.05	456109	517941	225679	320313
255.231	1.95533e+06	3938293	1.35849e+06	142351
265.147	8.91737e+06	3.86906e+06	1.39096e+06	525610
269.138	1.09453e+06	1514845	404766	531992
283.118	8.98763e+06	12289245	2.57729e+06	7.10347e+06
297.151	1.07472e+06	1.27825e+06	595275	405593
299.113	1.98815e+06	2.958e+06	633945	1.02509e+06
311.168	2.66385e+06	3.99585e+06	758019	1.31723e+06
319.094	2.42505e+07	2.20322e+07	9.89893e+06	7.90875e+06
325.183	2.09451e+06	3.86668e+06	35713.1	1.09432e+06
335.089	5.3656e+06	4.96583e+06	2.03649e+06	1.26992e+06
339.198	769555	2.05686e+06	164595	544454
354.174	1471606	1.77963e+06	801006	492637
360.22	2.11174e+06	2.22918e+06	724157	494117
365.245	2916873	1.58308e+06	1.52914e+06	866919
393.277	1.31518e+07	9.72244e+06	7.22497e+06	5.35404e+06
403.305	2.32528e+06	7282949	1.66906e+06	676647
408.22	4.6883e+06	5.237e+06	1.89446e+06	1.49805e+06
421.154	40981684	36435043	8.18268e+06	1.3491e+07
432.182	733445	1.59692e+06	362156	249706
434.237	6.77754e+06	4477852	2.57718e+06	1.3776e+06
437.137	6.54865e+06	7.82849e+06	3.0352e+06	2.95072e+06
447.135	1.18465e+06	2.00589e+06	268369	468075
448.173	2.94703e+06	2656335	14674.6	371754
453.131	18396024	23801928	8.71504e+06	1.12013e+07
461.111	248090	408558	148552	124293
475.127	1002542	2.61008e+06	1.05186e+06	2.67517e+06
503.16	3061089	1428146	1.04656e+06	602218
505.987	2421163	969817	30269.8	123460
540.33	1.76374e+06	3826927	1.41334e+06	1.00773e+06
588.959	153601	107867	8543.26	29110.9

## Sheet: Figure 6B
Extracted ion chromatographs, lactate
Time (min)	Anoxia, 5 hpf, sample 1		Time (min)	Anoxia, 5 hpf, sample 1		Time (min)	Nomoxia, 5 hpf, sample 1		Time (min)	Nomoxia, 5 hpf, sample 2
0.001	378.836		0.016	617.318		0.01	0		0.008	0
0.017	0		0.033	256.052		0.027	298.137		0.024	0
0.034	288.599		0.049	317.875		0.043	425.077		0.041	0
0.051	0		0.066	302.37		0.06	0		0.057	0
0.067	0		0.082	242.602		0.077	348.715		0.074	323.193
0.084	0		0.099	387.617		0.093	0		0.091	328.931
0.1	279.265		0.115	243.852		0.11	622.18		0.107	300.268
0.117	285.931		0.132	311.317		0.126	264.887		0.124	277.458
0.133	345.433		0.149	224.972		0.143	0		0.14	0
0.15	0		0.165	497.335		0.16	0		0.157	272.376
0.167	0		0.182	321.125		0.176	281.485		0.173	371.959
0.183	358.129		0.198	360.935		0.193	0		0.19	366.129
0.2	0		0.215	239.733		0.209	375.952		0.207	394.654
0.216	0		0.231	0		0.226	0		0.223	430.534
0.233	276.262		0.248	342.309		0.242	390.753		0.24	266.773
0.249	0		0.265	514.228		0.259	279.793		0.256	314.189
0.266	371.363		0.281	562.76		0.276	0		0.273	241.445
0.283	0		0.298	301.905		0.292	343.325		0.289	328.387
0.299	428.834		0.314	309.744		0.309	0		0.306	234.796
0.316	265.518		0.331	458.956		0.325	263.679		0.323	279.612
0.332	374.693		0.347	362.86		0.342	0		0.339	0
0.349	235.133		0.364	315.169		0.358	255.669		0.356	276.023
0.365	0		0.381	269.418		0.375	225.527		0.372	413.362
0.382	295.986		0.397	318.026		0.392	0		0.389	259.11
0.399	0		0.414	434.841		0.408	361.97		0.405	0
0.415	207.713		0.43	394.968		0.425	356.66		0.422	255.309
0.432	269.802		0.447	342.505		0.441	303.118		0.439	355.516
0.448	0		0.463	309.569		0.458	0		0.455	292.326
0.465	221.781		0.48	367.009		0.474	0		0.472	351.888
0.481	0		0.497	357.164		0.491	0		0.488	0
0.498	0		0.513	0		0.508	0		0.505	261.418
0.515	0		0.53	0		0.524	0		0.521	0
0.531	0		0.546	0		0.541	0		0.538	0
0.548	0		0.563	0		0.557	0		0.555	0
0.564	0		0.579	0		0.574	0		0.571	206.398
0.581	0		0.596	0		0.59	0		0.588	267.473
0.597	0		0.613	0		0.607	0		0.604	0
0.614	0		0.629	370.108		0.624	0		0.621	0
0.631	0		0.646	0		0.64	0		0.637	0
0.647	0		0.662	209.073		0.657	0		0.654	264.418
0.664	253.73		0.679	217.054		0.673	0		0.671	0
0.68	0		0.695	247.61		0.69	0		0.687	212.326
0.697	0		0.712	0		0.706	0		0.704	0
0.714	0		0.729	212.676		0.723	0		0.72	252.555
0.73	0		0.745	0		0.74	351.699		0.737	0
0.747	0		0.762	0		0.756	0		0.753	0
0.763	0		0.778	0		0.773	389.486		0.77	0
0.78	0		0.795	0		0.789	205.604		0.787	218.764
0.796	0		0.811	0		0.806	332.125		0.803	0
0.813	0		0.828	0		0.822	0		0.82	202.728
0.83	0		0.845	0		0.839	0		0.836	0
0.846	0		0.861	0		0.856	323.597		0.853	0
0.863	0		0.878	0		0.872	0		0.869	0
0.879	0		0.894	0		0.889	0		0.886	0
0.896	0		0.911	0		0.905	0		0.903	0
0.912	0		0.927	243.578		0.922	0		0.919	0
0.929	0		0.944	0		0.938	0		0.936	0
0.946	0		0.961	0		0.955	0		0.952	0
0.962	0		0.977	0		0.972	0		0.969	0
0.979	0		0.994	0		0.988	0		0.985	0
0.995	0		1.01	0		1.005	0		1.002	0
1.012	0		1.027	0		1.021	0		1.019	0
1.028	0		1.043	0		1.038	0		1.035	0
1.045	204.575		1.06	0		1.054	0		1.052	0
1.062	0		1.077	0		1.071	0		1.068	0
1.078	0		1.093	0		1.088	0		1.085	0
1.095	253.416		1.11	0		1.104	0		1.102	0
1.111	0		1.126	0		1.121	0		1.118	0
1.128	0		1.143	0		1.137	0		1.135	0
1.144	0		1.16	0		1.154	0		1.151	0
1.161	0		1.176	0		1.17	0		1.168	0
1.178	0		1.193	0		1.187	0		1.184	0
1.194	0		1.209	247.967		1.204	0		1.201	0
1.211	0		1.226	0		1.22	0		1.218	0
1.227	0		1.242	0		1.237	0		1.234	0
1.244	0		1.259	0		1.253	247.166		1.251	0
1.26	0		1.276	0		1.27	0		1.267	0
1.277	0		1.292	0		1.286	0		1.284	0
1.294	0		1.309	0		1.303	0		1.3	0
1.31	0		1.325	0		1.32	0		1.317	0
1.327	0		1.342	0		1.336	0		1.334	243.467
1.343	0		1.358	289.103		1.353	0		1.35	219.435
1.36	0		1.375	333.279		1.369	338.34		1.367	206.009
1.376	305.65		1.392	703.582		1.386	0		1.383	373.713
1.393	0		1.408	528.799		1.403	0		1.4	333.765
1.41	0		1.425	444.912		1.419	0		1.416	428.107
1.426	328.77		1.441	388.333		1.436	316.043		1.433	235.197
1.443	233.008		1.458	394.97		1.452	0		1.45	367.703
1.459	0		1.474	527.315		1.469	0		1.466	350.003
1.476	0		1.491	259.899		1.485	345.027		1.483	379.373
1.492	0		1.508	252.516		1.502	0		1.499	343.71
1.509	0		1.524	254.716		1.519	0		1.516	0
1.526	0		1.541	407.156		1.535	0		1.532	263.288
1.542	0		1.557	220.48		1.552	0		1.549	539.426
1.559	0		1.574	275.076		1.568	0		1.566	274.41
1.575	0		1.59	288.181		1.585	335.545		1.582	335.595
1.592	0		1.607	252.54		1.601	0		1.599	0
1.608	295.264		1.624	338.827		1.618	0		1.615	0
1.625	450.71		1.64	254.655		1.635	0		1.632	266.671
1.642	501.257		1.657	297.368		1.651	201.958		1.648	245.744
1.658	0		1.673	219.476		1.668	253.392		1.665	0
1.675	760.671		1.69	449.415		1.684	0		1.682	278.078
1.691	0		1.706	421.138		1.701	0		1.698	245.653
1.708	639.819		1.723	379.567		1.717	0		1.715	0
1.724	541.013		1.74	254.672		1.734	0		1.731	219.792
1.741	471.907		1.756	414.867		1.751	424.026		1.748	280.094
1.758	361.501		1.773	236.617		1.767	0		1.764	0
1.774	389.419		1.789	251.097		1.784	558.685		1.781	262.091
1.791	0		1.806	299.831		1.8	0		1.798	0
1.807	388.382		1.822	215.415		1.817	0		1.814	212.242
1.824	260.257		1.839	0		1.833	0		1.831	388.586
1.84	0		1.856	277.509		1.85	354.035		1.847	273.312
1.857	0		1.872	230.928		1.867	0		1.864	216.99
1.874	0		1.889	338.601		1.883	434.484		1.88	393.348
1.89	0		1.905	312.488		1.9	0		1.897	0
1.907	0		1.922	312.676		1.916	441.337		1.914	261.039
1.923	351.712		1.938	218.373		1.933	362.991		1.93	212.063
1.94	0		1.955	220.24		1.949	418.173		1.947	302.659
1.957	0		1.972	319.404		1.966	0		1.963	251.35
1.973	0		1.988	248.442		1.983	502.016		1.98	213.842
1.99	0		2.005	449.408		1.999	0		1.996	455.239
2.006	0		2.021	0		2.016	559.343		2.013	455.061
2.023	208.699		2.038	0		2.032	0		2.03	268.695
2.039	0		2.054	288.039		2.049	339.565		2.046	410.058
2.056	0		2.071	263.943		2.065	0		2.063	486.317
2.073	0		2.088	0		2.082	300.507		2.079	269.373
2.089	0		2.104	0		2.099	618.642		2.096	301.787
2.106	0		2.121	222.72		2.115	435.102		2.112	303.707
2.122	0		2.137	305.488		2.132	0		2.129	331.999
2.139	0		2.154	309.52		2.148	0		2.146	533.51
2.155	0		2.17	0		2.165	285.209		2.162	417.734
2.172	0		2.187	0		2.181	264.648		2.179	338.145
2.189	239.75		2.204	297.569		2.198	0		2.195	299.437
2.205	223.854		2.22	232.325		2.215	445.133		2.212	240.275
2.222	0		2.237	0		2.231	0		2.228	330.294
2.238	269.685		2.253	0		2.248	0		2.245	284.789
2.255	0		2.27	261.195		2.264	258.582		2.262	288.45
2.271	351.334		2.286	377.833		2.281	354.607		2.278	433.823
2.288	0		2.303	427.994		2.297	615.435		2.295	406.847
2.305	216.347		2.32	279.601		2.314	340.269		2.311	0
2.321	249.102		2.336	0		2.331	0		2.328	345.09
2.338	217.576		2.353	321.019		2.347	471.044		2.345	459.084
2.354	356.237		2.369	385.84		2.364	0		2.361	274.518
2.371	0		2.386	0		2.38	704.525		2.378	0
2.387	0		2.403	246.62		2.397	270.98		2.394	300.083
2.404	0		2.419	335.017		2.413	351.163		2.411	239.107
2.421	0		2.436	369.746		2.43	411.765		2.427	364.001
2.437	312.929		2.452	281.377		2.447	264.957		2.444	0
2.454	0		2.469	0		2.463	428.024		2.461	403.794
2.47	0		2.485	0		2.48	484.672		2.477	0
2.487	278.959		2.502	238.868		2.496	351.535		2.494	239.025
2.503	269.785		2.519	358.089		2.513	333.137		2.51	0
2.52	0		2.535	292.544		2.529	0		2.527	285.391
2.537	0		2.552	405.341		2.546	0		2.543	295.698
2.553	315.296		2.568	282.666		2.563	232.49		2.56	0
2.57	0		2.585	297.331		2.579	0		2.577	259.711
2.586	0		2.601	270.85		2.596	0		2.593	365.434
2.603	267.739		2.618	407.844		2.612	0		2.61	220.513
2.619	0		2.635	236.757		2.629	0		2.626	337.456
2.636	211.239		2.651	295.563		2.646	0		2.643	234.924
2.653	0		2.668	304.822		2.662	0		2.659	0
2.669	0		2.684	460.33		2.679	0		2.676	387.571
2.686	363.793		2.701	328.257		2.695	375.616		2.693	0
2.702	0		2.717	347.16		2.712	276.41		2.709	260.546
2.719	0		2.734	0		2.728	341.754		2.726	438.66
2.735	225.861		2.751	326.27		2.745	315.692		2.742	0
2.752	0		2.767	0		2.762	342.339		2.759	315.22
2.769	0		2.784	389.419		2.778	0		2.775	233.614
2.785	0		2.8	356.786		2.795	432.439		2.792	0
2.802	319.508		2.817	396.613		2.811	0		2.809	0
2.818	0		2.833	328.91		2.828	0		2.825	0
2.835	0		2.85	222.733		2.844	437.258		2.842	522.884
2.851	0		2.867	322.086		2.861	490.651		2.858	0
2.868	0		2.883	325.144		2.878	526.827		2.875	247.627
2.885	301.221		2.9	293.457		2.894	0		2.891	217.53
2.901	0		2.916	0		2.911	0		2.908	211.125
2.918	0		2.933	259.739		2.927	0		2.925	395.693
2.934	0		2.949	292.282		2.944	0		2.941	284.109
2.951	0		2.966	357.427		2.96	493.801		2.958	291.655
2.967	0		2.983	241.927		2.977	0		2.974	243.517
2.984	0		2.999	234.208		2.994	300.099		2.991	0
3.001	0		3.016	282.012		3.01	0		3.007	0
3.017	0		3.032	0		3.027	0		3.024	276.616
3.034	246.573		3.049	223.171		3.043	353.828		3.041	306.365
3.05	0		3.065	0		3.06	347.298		3.057	310.862
3.067	0		3.082	0		3.076	617.154		3.074	306.113
3.083	0		3.099	0		3.093	448.632		3.09	238.839
3.1	213.705		3.115	216.727		3.11	0		3.107	240.823
3.117	0		3.132	236.886		3.126	451.951		3.123	0
3.133	0		3.148	0		3.143	383.116		3.14	217.241
3.15	0		3.165	304.47		3.159	0		3.157	209.593
3.166	0		3.181	218.073		3.176	0		3.173	0
3.183	0		3.198	328.758		3.192	331.366		3.19	325.439
3.2	243.789		3.215	208.924		3.209	248.782		3.206	0
3.216	0		3.231	274.218		3.226	208.382		3.223	306.84
3.233	0		3.248	288.162		3.242	364.677		3.239	361.392
3.249	0		3.264	295.186		3.259	258.257		3.256	0
3.266	0		3.281	244.086		3.275	221.064		3.273	248.467
3.282	0		3.297	0		3.292	0		3.289	0
3.299	0		3.314	230.288		3.308	350.108		3.306	0
3.316	0		3.331	315.716		3.325	0		3.322	288.217
3.332	0		3.347	250.477		3.342	307.135		3.339	207.125
3.349	0		3.364	256.195		3.358	363.472		3.355	322.657
3.365	0		3.38	236.833		3.375	0		3.372	0
3.382	0		3.397	316.353		3.391	309.245		3.389	273.94
3.398	0		3.413	366.728		3.408	0		3.405	0
3.415	0		3.43	421.728		3.424	333.793		3.422	233.553
3.432	0		3.447	238.101		3.441	0		3.438	0
3.448	0		3.463	360.09		3.458	0		3.455	0
3.465	216.57		3.48	441.182		3.474	0		3.471	0
3.481	0		3.496	256.091		3.491	417.777		3.488	219.906
3.498	0		3.513	231.424		3.507	0		3.505	217.524
3.514	275.404		3.529	275.414		3.524	0		3.521	272.386
3.531	0		3.546	0		3.54	0		3.538	321.557
3.548	209.42		3.563	0		3.557	0		3.554	0
3.564	426.02		3.579	303.246		3.574	267.819		3.571	0
3.581	266.18		3.596	0		3.59	0		3.588	0
3.597	270.137		3.612	0		3.607	0		3.604	265.484
3.614	0		3.629	292.988		3.623	0		3.621	0
3.63	425.87		3.646	0		3.64	358.924		3.637	237.704
3.647	0		3.662	312.691		3.656	280.124		3.654	0
3.664	237.681		3.679	401.689		3.673	0		3.67	0
3.68	302.359		3.695	320.028		3.69	0		3.687	0
3.697	0		3.712	390.639		3.706	0		3.704	0
3.713	0		3.728	222.96		3.723	289.769		3.72	0
3.73	336.97		3.745	316.538		3.739	0		3.737	0
3.746	0		3.762	261.195		3.756	205.974		3.753	215.903
3.763	284.36		3.778	372.457		3.772	0		3.77	0
3.78	0		3.795	254.873		3.789	0		3.786	0
3.796	0		3.811	265.434		3.806	0		3.803	0
3.813	345.202		3.828	418.029		3.822	301.531		3.82	358.693
3.829	0		3.844	225.611		3.839	0		3.836	239.971
3.846	0		3.861	331.862		3.855	0		3.853	258.271
3.862	0		3.878	354.965		3.872	0		3.869	378.018
3.879	0		3.894	0		3.889	0		3.886	0
3.896	307.707		3.911	0		3.905	0		3.902	246.562
3.912	295.729		3.927	309.252		3.922	0		3.919	239.182
3.929	0		3.944	0		3.938	0		3.936	0
3.945	0		3.96	304.762		3.955	0		3.952	0
3.962	0		3.977	0		3.971	0		3.969	330.107
3.978	0		3.994	218.688		3.988	269.272		3.985	0
3.995	0		4.01	308.891		4.005	247.919		4.002	0
4.012	269.082		4.027	279.843		4.021	0		4.018	0
4.028	0		4.043	0		4.038	330.168		4.035	0
4.045	357.092		4.06	372.886		4.054	214.747		4.052	0
4.061	0		4.076	241.929		4.071	0		4.068	0
4.078	0		4.093	0		4.087	0		4.085	0
4.094	266.83		4.11	255.49		4.104	296.429		4.101	0
4.111	0		4.126	304.851		4.121	245.256		4.118	0
4.128	0		4.143	223.32		4.137	254.348		4.134	0
4.144	0		4.159	228.74		4.154	361.349		4.151	210.106
4.161	0		4.176	0		4.17	0		4.168	0
4.177	0		4.192	227.307		4.187	0		4.184	227.087
4.194	0		4.209	0		4.203	232.867		4.201	0
4.21	295.487		4.226	0		4.22	0		4.217	0
4.227	0		4.242	0		4.237	208.652		4.234	355.908
4.244	218.53		4.259	0		4.253	0		4.25	278.125
4.26	0		4.275	306.942		4.27	0		4.267	0
4.277	0		4.292	340.738		4.286	0		4.284	257.724
4.293	0		4.308	423.155		4.303	334.514		4.3	0
4.31	0		4.325	228.324		4.319	0		4.317	0
4.326	0		4.342	0		4.336	0		4.333	277.085
4.343	300.395		4.358	235.952		4.353	304.633		4.35	272.151
4.36	0		4.375	356.237		4.369	287.416		4.366	0
4.376	0		4.391	0		4.386	0		4.383	0
4.393	216.556		4.408	0		4.402	317.397		4.4	231.758
4.409	0		4.424	208.323		4.419	0		4.416	0
4.426	0		4.441	215.961		4.435	0		4.433	0
4.443	0		4.458	222.856		4.452	0		4.449	216.811
4.459	0		4.474	216.256		4.469	0		4.466	0
4.476	0		4.491	229.09		4.485	322.611		4.482	0
4.492	0		4.507	226.65		4.502	336.119		4.499	0
4.509	0		4.524	254.825		4.518	331.143		4.516	0
4.525	0		4.54	243.108		4.535	0		4.532	0
4.542	255.278		4.557	236.17		4.551	0		4.549	318.518
4.559	326.142		4.574	239.614		4.568	0		4.565	0
4.575	244.456		4.59	246.141		4.585	0		4.582	270.308
4.592	243.676		4.607	0		4.601	0		4.598	0
4.608	300.524		4.623	267.242		4.618	0		4.615	379.267
4.625	0		4.64	259.336		4.634	246.874		4.632	213.282
4.641	0		4.656	0		4.651	0		4.648	0
4.658	0		4.673	368.136		4.667	0		4.665	0
4.675	0		4.69	0		4.684	491.609		4.681	0
4.691	0		4.706	0		4.701	0		4.698	0
4.708	0		4.723	256.597		4.717	251.583		4.714	208.534
4.724	387.684		4.739	0		4.734	0		4.731	0
4.741	202.599		4.756	307.988		4.75	0		4.748	0
4.757	0		4.772	242.993		4.767	230.329		4.764	0
4.774	0		4.789	260.762		4.783	0		4.781	0
4.791	0		4.806	242.729		4.8	204.356		4.797	0
4.807	0		4.822	215.068		4.817	229.811		4.814	0
4.824	0		4.839	265.125		4.833	0		4.831	295.35
4.84	265.756		4.855	0		4.85	0		4.847	252.677
4.857	305.045		4.872	215.111		4.866	0		4.864	0
4.873	0		4.889	302.532		4.883	0		4.88	0
4.89	263.864		4.905	291.439		4.899	341.099		4.897	0
4.907	0		4.922	272.684		4.916	288.7		4.913	0
4.923	0		4.938	243.433		4.933	0		4.93	0
4.94	213.46		4.955	0		4.949	0		4.947	268.285
4.956	0		4.971	441.391		4.966	220.189		4.963	202.757
4.973	0		4.988	396.163		4.982	336.831		4.98	0
4.989	0		5.005	238.637		4.999	0		4.996	0
5.006	0		5.021	482.193		5.015	0		5.013	321.108
5.023	0		5.038	248.926		5.032	324.065		5.029	239.493
5.039	0		5.054	202.631		5.049	0		5.046	0
5.056	242.941		5.071	0		5.065	0		5.063	248.283
5.072	281.213		5.087	283.512		5.082	217.668		5.079	0
5.089	0		5.104	0		5.098	0		5.096	0
5.105	0		5.121	240.561		5.115	0		5.112	296.088
5.122	0		5.137	271.512		5.132	0		5.129	0
5.139	260.27		5.154	230.866		5.148	0		5.145	0
5.155	314.01		5.17	280.37		5.165	0		5.162	0
5.172	0		5.187	505.159		5.181	0		5.179	0
5.188	0		5.203	279.926		5.198	0		5.195	0
5.205	293.432		5.22	325.759		5.214	0		5.212	213.365
5.221	0		5.237	0		5.231	0		5.228	0
5.238	0		5.253	412.343		5.248	0		5.245	203.286
5.255	0		5.27	0		5.264	0		5.261	0
5.271	0		5.286	254.61		5.281	239.575		5.278	0
5.288	0		5.303	360.643		5.297	0		5.295	0
5.304	0		5.319	0		5.314	0		5.311	0
5.321	0		5.336	0		5.33	0		5.328	252.239
5.337	0		5.353	324.723		5.347	0		5.344	205.167
5.354	0		5.369	242.095		5.364	0		5.361	0
5.371	242.264		5.386	0		5.38	0		5.377	205.963
5.387	215.628		5.402	0		5.397	213.012		5.394	0
5.404	0		5.419	371.084		5.413	0		5.411	0
5.42	0		5.435	282.837		5.43	0		5.427	0
5.437	0		5.452	224.54		5.446	0		5.444	235.637
5.453	0		5.469	0		5.463	0		5.46	0
5.47	0		5.485	204.811		5.48	0		5.477	0
5.487	0		5.502	326.71		5.496	0		5.493	0
5.503	0		5.518	218.774		5.513	0		5.51	0
5.52	204.125		5.535	449.678		5.529	0		5.527	0
5.536	228.88		5.551	340.804		5.546	0		5.543	0
5.553	0		5.568	287.863		5.562	0		5.56	208.146
5.569	261.648		5.585	338.919		5.579	0		5.576	0
5.586	0		5.601	271.858		5.596	0		5.593	0
5.603	282.42		5.618	309.043		5.612	0		5.609	273.004
5.619	0		5.634	0		5.629	0		5.626	0
5.636	0		5.651	280.845		5.645	0		5.643	236.5
5.652	0		5.667	346.253		5.662	0		5.659	0
5.669	0		5.684	0		5.678	0		5.676	0
5.685	0		5.701	310.005		5.695	0		5.692	303.998
5.702	210.631		5.717	295.702		5.712	0		5.709	0
5.719	0		5.734	284.526		5.728	0		5.725	0
5.735	0		5.75	253.432		5.745	0		5.742	239.183
5.752	0		5.767	268.308		5.761	0		5.759	0
5.768	0		5.783	0		5.778	314.984		5.775	295.597
5.785	0		5.8	0		5.794	0		5.792	300.576
5.802	0		5.817	226.651		5.811	0		5.808	0
5.818	0		5.833	228.392		5.828	0		5.825	0
5.835	304.411		5.85	0		5.844	0		5.841	0
5.851	0		5.866	243.132		5.861	0		5.858	234.138
5.868	285.341		5.883	323.769		5.877	0		5.875	252.402
5.884	0		5.899	315.629		5.894	0		5.891	344.074
5.901	0		5.916	272.384		5.91	0		5.908	0
5.918	0		5.933	276.806		5.927	0		5.924	258.311
5.934	0		5.949	318.877		5.944	0		5.941	0
5.951	0		5.966	253.288		5.96	0		5.957	0
5.967	222.724		5.982	429.389		5.977	0		5.974	271.797
5.984	0		5.999	251.582		5.993	0		5.991	222.029
6	0		6.015	244.698		6.01	0		6.007	239.438
6.017	0		6.032	325.343		6.026	265.629		6.024	0
6.034	0		6.049	273.297		6.043	0		6.04	0
6.05	0		6.065	0		6.06	0		6.057	0
6.067	0		6.082	203.724		6.076	0		6.074	0
6.083	0		6.098	297.562		6.093	0		6.09	0
6.1	0		6.115	0		6.109	0		6.107	0
6.116	0		6.132	249.245		6.126	0		6.123	0
6.133	0		6.148	396.415		6.142	0		6.14	0
6.15	0		6.165	0		6.159	0		6.156	278.325
6.166	0		6.181	230.506		6.176	0		6.173	0
6.183	0		6.198	316.899		6.192	0		6.19	280.003
6.199	0		6.214	273.954		6.209	383.408		6.206	260.534
6.216	220.845		6.231	291.983		6.225	0		6.223	0
6.232	246.785		6.248	272.487		6.242	0		6.239	0
6.249	0		6.264	217.189		6.258	0		6.256	0
6.266	0		6.281	280.786		6.275	0		6.272	0
6.282	270.715		6.297	285.385		6.292	0		6.289	0
6.299	239.571		6.314	211.221		6.308	0		6.306	0
6.315	0		6.33	360.462		6.325	0		6.322	233.766
6.332	278.164		6.347	231.649		6.341	271.873		6.339	0
6.348	225.28		6.364	0		6.358	0		6.355	0
6.365	0		6.38	304.142		6.375	0		6.372	0
6.382	0		6.397	203.064		6.391	0		6.388	0
6.398	237.076		6.413	302.724		6.408	245.551		6.405	244.861
6.415	461.749		6.43	0		6.424	258.529		6.422	308.074
6.431	237.206		6.446	0		6.441	0		6.438	241.405
6.448	284.016		6.463	242.355		6.457	0		6.455	0
6.464	0		6.48	217.772		6.474	0		6.471	0
6.481	0		6.496	313.052		6.491	0		6.488	0
6.498	0		6.513	457.04		6.507	0		6.504	236.605
6.514	286.159		6.529	0		6.524	244.809		6.521	0
6.531	482.55		6.546	240.825		6.54	293.792		6.538	0
6.547	0		6.562	0		6.557	313.519		6.554	256.426
6.564	294.079		6.579	286.509		6.573	0		6.571	325.476
6.58	0		6.596	228.13		6.59	0		6.587	0
6.597	368.638		6.612	300.579		6.607	0		6.604	0
6.614	229.89		6.629	232.124		6.623	242.074		6.62	0
6.63	0		6.645	314.379		6.64	0		6.637	0
6.647	0		6.662	207.306		6.656	0		6.654	0
6.663	0		6.678	307.717		6.673	0		6.67	0
6.68	0		6.695	281.152		6.689	0		6.687	0
6.696	0		6.712	341.47		6.706	0		6.703	0
6.713	232.325		6.728	274.195		6.723	229.318		6.72	248.158
6.73	0		6.745	217.216		6.739	0		6.736	211.219
6.746	291.823		6.761	0		6.756	0		6.753	388.329
6.763	283.216		6.778	0		6.772	0		6.77	235.171
6.779	256.964		6.794	305.105		6.789	0		6.786	0
6.796	0		6.811	0		6.805	214.388		6.803	0
6.812	0		6.828	283.993		6.822	0		6.819	0
6.829	0		6.844	312.76		6.839	0		6.836	0
6.846	0		6.861	0		6.855	0		6.852	0
6.862	0		6.877	297.704		6.872	0		6.869	0
6.879	0		6.894	331.105		6.888	0		6.886	0
6.895	210.654		6.91	379.75		6.905	0		6.902	0
6.912	0		6.927	294.108		6.921	311.22		6.919	0
6.928	0		6.944	365.403		6.938	0		6.935	207.157
6.945	0		6.96	303.449		6.955	0		6.952	0
6.962	334.677		6.977	0		6.971	0		6.968	0
6.978	0		6.993	221.229		6.988	0		6.985	0
6.995	0		7.01	352.935		7.004	247.406		7.002	0
7.011	0		7.026	309.923		7.021	204.853		7.018	242.673
7.028	268.343		7.043	211.436		7.037	0		7.035	216.078
7.045	0		7.06	330.227		7.054	0		7.051	0
7.061	296.889		7.076	260.765		7.071	0		7.068	268.919
7.078	205.552		7.093	457.191		7.087	0		7.084	0
7.094	0		7.109	0		7.104	0		7.101	236.738
7.111	0		7.126	202.725		7.12	0		7.118	224.982
7.127	0		7.142	370.704		7.137	331.23		7.134	0
7.144	0		7.159	361.634		7.153	0		7.151	243.383
7.161	228.637		7.176	216.626		7.17	0		7.167	239.729
7.177	0		7.192	225.086		7.187	221.236		7.184	260.125
7.194	0		7.209	0		7.203	213.648		7.2	0
7.21	0		7.225	306.599		7.22	0		7.217	0
7.227	0		7.242	304.315		7.236	0		7.234	0
7.243	0		7.258	282.16		7.253	218.681		7.25	0
7.26	205.571		7.275	261.697		7.269	0		7.267	0
7.277	0		7.292	0		7.286	0		7.283	284.2
7.293	263.271		7.308	447		7.303	0		7.3	256.238
7.31	252.389		7.325	0		7.319	0		7.317	332.925
7.326	0		7.341	240.897		7.336	0		7.333	0
7.343	0		7.358	347.228		7.352	229.388		7.35	0
7.359	0		7.375	350.405		7.369	217.596		7.366	329.986
7.376	248.53		7.391	295.163		7.385	342.772		7.383	0
7.393	0		7.408	0		7.402	220.76		7.399	0
7.409	211.956		7.424	289.221		7.419	385.669		7.416	0
7.426	0		7.441	0		7.435	272.679		7.433	0
7.442	0		7.457	268.86		7.452	316.556		7.449	262.801
7.459	0		7.474	291.62		7.468	0		7.466	208.981
7.475	244.367		7.491	0		7.485	0		7.482	224.147
7.492	0		7.507	237.509		7.501	0		7.499	0
7.509	217.111		7.524	354.51		7.518	0		7.515	0
7.525	325.726		7.54	234.323		7.535	249.778		7.532	205.182
7.542	0		7.557	0		7.551	0		7.549	0
7.558	0		7.573	325.424		7.568	0		7.565	0
7.575	259.259		7.59	226.622		7.584	204.53		7.582	0
7.591	0		7.607	317.517		7.601	0		7.598	0
7.608	0		7.623	328.366		7.618	0		7.615	267.863
7.625	0		7.64	0		7.634	295.919		7.631	312.163
7.641	0		7.656	251.337		7.651	349.722		7.648	334.431
7.658	281.15		7.673	235.23		7.667	0		7.665	293.227
7.674	251.916		7.689	401.538		7.684	0		7.681	231.95
7.691	0		7.706	232.167		7.7	208.872		7.698	0
7.707	0		7.723	320.66		7.717	0		7.714	0
7.724	0		7.739	0		7.734	265.047		7.731	226.845
7.741	0		7.756	0		7.75	0		7.747	0
7.757	256.998		7.772	256.204		7.767	0		7.764	0
7.774	0		7.789	339.461		7.783	0		7.781	0
7.79	241.091		7.805	0		7.8	263.269		7.797	220.543
7.807	304.613		7.822	306.024		7.816	0		7.814	0
7.823	0		7.839	267.785		7.833	0		7.83	229.235
7.84	0		7.855	229.893		7.85	0		7.847	0
7.857	245.554		7.872	229.559		7.866	248.485		7.863	0
7.873	0		7.888	472.056		7.883	0		7.88	277.753
7.89	0		7.905	364.605		7.899	237.246		7.897	0
7.906	271.1		7.921	345.459		7.916	0		7.913	0
7.923	0		7.938	233.682		7.932	0		7.93	0
7.939	0		7.955	461.748		7.949	0		7.946	0
7.956	0		7.971	239.884		7.966	0		7.963	0
7.973	226.095		7.988	0		7.982	324.19		7.979	0
7.989	0		8.004	316.203		7.999	0		7.996	292.193
8.006	0		8.021	204.469		8.015	0		8.013	0
8.022	0		8.037	0		8.032	0		8.029	0
8.039	203.995		8.054	355.503		8.048	0		8.046	217.047
8.055	0		8.071	297.79		8.065	212.807		8.062	292.764
8.072	266.807		8.087	211.881		8.082	235.944		8.079	0
8.089	0		8.104	231.49		8.098	0		8.095	0
8.105	0		8.12	360.174		8.115	0		8.112	227.414
8.122	0		8.137	331.271		8.131	0		8.129	268.261
8.138	325.524		8.153	226.604		8.148	0		8.145	248.441
8.155	367.698		8.17	0		8.164	0		8.162	0
8.171	0		8.187	317.243		8.181	228.234		8.178	286.215
8.188	0		8.203	0		8.198	324.452		8.195	214.695
8.205	0		8.22	316.79		8.214	0		8.211	0
8.221	388.583		8.236	329.232		8.231	280.708		8.228	0
8.238	218.329		8.253	272.749		8.247	0		8.245	223.838
8.254	0		8.269	214.663		8.264	0		8.261	0
8.271	209.285		8.286	214.415		8.28	0		8.278	0
8.288	0		8.303	301.802		8.297	218.153		8.294	0
8.304	210.69		8.319	323.832		8.314	0		8.311	0
8.321	0		8.336	288.8		8.33	230.969		8.327	0
8.337	0		8.352	357.295		8.347	269.548		8.344	0
8.354	280.298		8.369	422.113		8.363	0		8.361	0
8.37	0		8.385	248.603		8.38	0		8.377	248.558
8.387	0		8.402	246.995		8.396	0		8.394	0
8.404	293.332		8.419	268.028		8.413	0		8.41	0
8.42	0		8.435	387.335		8.43	271.127		8.427	0
8.437	0		8.452	273.385		8.446	0		8.443	0
8.453	301.911		8.468	0		8.463	262.156		8.46	0
8.47	314.753		8.485	483.257		8.479	0		8.477	0
8.486	0		8.501	0		8.496	0		8.493	0
8.503	226.719		8.518	326.51		8.512	0		8.51	224.285
8.52	225.339		8.535	384.415		8.529	0		8.526	219.972
8.536	302.399		8.551	248.531		8.546	0		8.543	0
8.553	0		8.568	0		8.562	0		8.56	274.557
8.569	0		8.584	287.775		8.579	0		8.576	0
8.586	0		8.601	323.888		8.595	0		8.593	219.697
8.602	0		8.617	0		8.612	0		8.609	0
8.619	204.282		8.634	231.044		8.628	310.757		8.626	0
8.636	0		8.651	248.58		8.645	0		8.642	0
8.652	211.618		8.667	386.282		8.662	200.838		8.659	0
8.669	0		8.684	212.477		8.678	381.103		8.676	0
8.685	0		8.7	235.823		8.695	0		8.692	0
8.702	0		8.717	295.591		8.711	0		8.709	292.082
8.718	0		8.734	0		8.728	0		8.725	0
8.735	0		8.75	215.34		8.744	0		8.742	256.734
8.752	0		8.767	265.093		8.761	0		8.758	0
8.768	433.411		8.783	254.564		8.778	0		8.775	362.255
8.785	274.532		8.8	246.187		8.794	205.93		8.792	0
8.801	319.114		8.816	232.632		8.811	233.769		8.808	0
8.818	356.9		8.833	221.718		8.827	0		8.825	0
8.834	0		8.85	309.186		8.844	0		8.841	0
8.851	0		8.866	259.422		8.861	219.539		8.858	0
8.868	0		8.883	0		8.877	244.404		8.874	0
8.884	0		8.899	0		8.894	0		8.891	0
8.901	282.56		8.916	297.495		8.91	0		8.908	240.414
8.917	280.819		8.932	0		8.927	0		8.924	0
8.934	0		8.949	283.4		8.943	229.048		8.941	324.469
8.95	319.098		8.966	0		8.96	0		8.957	0
8.967	0		8.982	211.133		8.977	0		8.974	284.142
8.984	0		8.999	386.324		8.993	0		8.99	0
9	0		9.015	288.714		9.01	398.262		9.007	0
9.017	0		9.032	222.413		9.026	326.339		9.024	0
9.033	0		9.048	235.021		9.043	0		9.04	291.905
9.05	0		9.065	274.884		9.059	232.975		9.057	0
9.066	224.761		9.082	402.935		9.076	224.632		9.073	0
9.083	0		9.098	268.531		9.093	0		9.09	245.188
9.1	243.544		9.115	203.89		9.109	357.728		9.106	0
9.116	0		9.131	327.417		9.126	0		9.123	0
9.133	0		9.148	314.226		9.142	0		9.14	0
9.149	0		9.164	366.479		9.159	0		9.156	275.03
9.166	0		9.181	291.087		9.175	0		9.173	0
9.182	0		9.198	220.654		9.192	242.54		9.189	0
9.199	0		9.214	348.376		9.209	0		9.206	0
9.216	270.154		9.231	244.743		9.225	0		9.222	222.202
9.232	0		9.247	0		9.242	0		9.239	255.426
9.249	0		9.264	288.709		9.258	214.316		9.256	0
9.265	0		9.28	265.748		9.275	0		9.272	239.208
9.282	0		9.297	307.124		9.291	0		9.289	0
9.298	0		9.314	282.249		9.308	306.045		9.305	0
9.315	249.428		9.33	266.252		9.325	261.695		9.322	221.304
9.332	289.158		9.347	0		9.341	214.247		9.338	0
9.348	0		9.363	0		9.358	0		9.355	0
9.365	0		9.38	205.515		9.374	223.538		9.372	0
9.381	214.553		9.396	365.777		9.391	0		9.388	260.737
9.398	0		9.413	287.979		9.407	0		9.405	0
9.414	352.701		9.43	210.987		9.424	0		9.421	0
9.431	0		9.446	221.129		9.441	0		9.438	234.291
9.448	0		9.463	0		9.457	0		9.454	0
9.464	386.418		9.479	264.188		9.474	232.234		9.471	0
9.481	0		9.496	0		9.49	247.125		9.488	0
9.497	0		9.512	340.627		9.507	0		9.504	0
9.514	0		9.529	222.632		9.523	0		9.521	262.448
9.531	0		9.546	348.027		9.54	349.237		9.537	0
9.547	297.843		9.562	329.95		9.557	0		9.554	206.24
9.564	343.599		9.579	317.815		9.573	263.669		9.57	0
9.58	305.268		9.595	264.255		9.59	0		9.587	392.363
9.597	0		9.612	315.767		9.606	0		9.604	297.605
9.613	0		9.628	285.002		9.623	325.942		9.62	0
9.63	0		9.645	263.824		9.639	324.743		9.637	0
9.647	420.265		9.662	0		9.656	0		9.653	0
9.663	253.391		9.678	0		9.673	0		9.67	292.959
9.68	0		9.695	292.268		9.689	0		9.686	257.15
9.696	258.588		9.711	0		9.706	0		9.703	0
9.713	0		9.728	227.983		9.722	215.21		9.72	0
9.729	378.314		9.744	0		9.739	363.048		9.736	219.209
9.746	0		9.761	278.576		9.755	0		9.753	0
9.763	247.23		9.778	241.752		9.772	0		9.769	0
9.779	0		9.794	397.84		9.789	346.407		9.786	0
9.796	0		9.811	0		9.805	251.692		9.803	0
9.812	0		9.827	432.638		9.822	227.134		9.819	0
9.829	0		9.844	0		9.838	0		9.836	244.441
9.845	0		9.86	324.406		9.855	0		9.852	218.515
9.862	0		9.877	253.334		9.871	0		9.869	244.686
9.879	0		9.894	0		9.888	0		9.885	253.824
9.895	319.931		9.91	226.889		9.905	361.728		9.902	0
9.912	423.83		9.927	273.617		9.921	0		9.919	318.466
9.928	206.937		9.943	481.255		9.938	209.955		9.935	280.133
9.945	0		9.96	0		9.954	0		9.952	0
9.961	237.299		9.977	0		9.971	0		9.968	0
9.978	0		9.993	325.693		9.987	0		9.985	0
9.995	0		10.01	287.045		10.004	0		10.001	0
10.011	0		10.026	527.079		10.021	254.444		10.018	0
10.028	203.605		10.043	512.166		10.037	0		10.035	244.728
10.044	0		10.059	0		10.054	221.865		10.051	209.162
10.061	306.4		10.076	210.385		10.07	0		10.068	366.996
10.077	294.645		10.093	0		10.087	0		10.084	0
10.094	0		10.109	420.099		10.103	0		10.101	309.467
10.111	219.479		10.126	0		10.12	0		10.117	0
10.127	0		10.142	243.015		10.137	0		10.134	0
10.144	0		10.159	0		10.153	229.5		10.151	0
10.16	0		10.175	348.237		10.17	0		10.167	0
10.177	0		10.192	339.424		10.186	291.856		10.184	392.631
10.193	0		10.209	213.622		10.203	288.889		10.2	0
10.21	266.732		10.225	0		10.22	0		10.217	394.13
10.227	0		10.242	0		10.236	0		10.233	263.781
10.243	0		10.258	0		10.253	0		10.25	0
10.26	0		10.275	287.306		10.269	0		10.267	0
10.276	263.378		10.291	0		10.286	265.361		10.283	233.624
10.293	0		10.308	251.697		10.302	226.37		10.3	215.343
10.309	0		10.325	264.912		10.319	0		10.316	221.69
10.326	0		10.341	314.719		10.336	260.144		10.333	0
10.343	0		10.358	323.832		10.352	0		10.349	0
10.359	0		10.374	348.518		10.369	0		10.366	0
10.376	321.623		10.391	415.995		10.385	0		10.383	283.605
10.392	0		10.407	0		10.402	0		10.399	0
10.409	0		10.424	345.626		10.418	266.452		10.416	322.849
10.425	0		10.441	238.448		10.435	0		10.432	0
10.442	0		10.457	0		10.452	296.5		10.449	239.399
10.459	0		10.474	283.523		10.468	0		10.465	0
10.475	0		10.49	290.763		10.485	262.587		10.482	222.077
10.492	0		10.507	261.306		10.501	0		10.499	240.195
10.508	0		10.523	263.169		10.518	0		10.515	209.149
10.525	403.537		10.54	329.368		10.534	288.005		10.532	0
10.541	0		10.557	0		10.551	0		10.548	0
10.558	0		10.573	292.881		10.568	0		10.565	0
10.575	342.893		10.59	0		10.584	0		10.581	0
10.591	265.546		10.606	448.226		10.601	0		10.598	0
10.608	0		10.623	249.02		10.617	0		10.615	0
10.624	222.429		10.639	205.879		10.634	396.312		10.631	348.873
10.641	0		10.656	219.337		10.65	0		10.648	0
10.657	250.433		10.673	388.821		10.667	0		10.664	317.709
10.674	0		10.689	0		10.684	240.815		10.681	281.937
10.691	0		10.706	372.584		10.7	0		10.697	0
10.707	0		10.722	400.597		10.717	293.147		10.714	0
10.724	0		10.739	481.686		10.733	212.158		10.731	235.116
10.74	0		10.755	232.908		10.75	0		10.747	0
10.757	236.649		10.772	344.575		10.766	0		10.764	0
10.774	0		10.789	297.394		10.783	0		10.78	0
10.79	303.643		10.805	317.972		10.8	205.118		10.797	431.666
10.807	0		10.822	253.19		10.816	0		10.813	255.291
10.823	0		10.838	0		10.833	0		10.83	261.492
10.84	0		10.855	230.144		10.849	210.315		10.847	216.315
10.856	335.163		10.871	216.18		10.866	0		10.863	238.044
10.873	327.542		10.888	232.428		10.882	372.648		10.88	237.489
10.89	332.137		10.905	311.704		10.899	0		10.896	283.621
10.906	273.813		10.921	202.326		10.916	0		10.913	0
10.923	0		10.938	281.385		10.932	0		10.929	489.338
10.939	0		10.954	283.241		10.949	311.364		10.946	0
10.956	0		10.971	208.375		10.965	0		10.963	0
10.972	303.538		10.987	253.633		10.982	0		10.979	200.382
10.989	0		11.004	0		10.998	264.366		10.996	0
11.006	0		11.021	227.572		11.015	0		11.012	0
11.022	0		11.037	275.41		11.032	401.206		11.029	206.393
11.039	0		11.054	271.389		11.048	0		11.046	0
11.055	0		11.07	266.379		11.065	0		11.062	0
11.072	0		11.087	233.274		11.081	0		11.079	217.688
11.088	288.374		11.103	0		11.098	224.013		11.095	0
11.105	230.826		11.12	256.383		11.114	0		11.112	0
11.122	376.798		11.137	377.727		11.131	0		11.128	257.985
11.138	209.643		11.153	320.042		11.148	221.505		11.145	259.933
11.155	251.195		11.17	247.46		11.164	0		11.162	0
11.171	0		11.186	329.131		11.181	0		11.178	388.435
11.188	224.086		11.203	248.708		11.197	0		11.195	235.883
11.204	0		11.22	219.162		11.214	0		11.211	262.539
11.221	231.717		11.236	265.386		11.23	0		11.228	0
11.238	274.688		11.253	255.074		11.247	0		11.244	349.291
11.254	0		11.269	485.185		11.264	0		11.261	0
11.271	0		11.286	296.262		11.28	0		11.278	0
11.287	360.536		11.302	237.445		11.297	366.248		11.294	0
11.304	0		11.319	0		11.313	0		11.311	0
11.32	322.203		11.336	324.811		11.33	261.264		11.327	0
11.337	0		11.352	0		11.346	0		11.344	263.573
11.354	257.241		11.369	252.344		11.363	0		11.36	0
11.37	0		11.385	217.494		11.38	0		11.377	0
11.387	0		11.402	325.037		11.396	0		11.394	346.298
11.403	0		11.418	299.625		11.413	217.786		11.41	0
11.42	290.887		11.435	0		11.429	0		11.427	0
11.436	0		11.452	0		11.446	0		11.443	0
11.453	0		11.468	388.018		11.463	0		11.46	0
11.47	0		11.485	254.208		11.479	226.354		11.476	254.516
11.486	0		11.501	305.421		11.496	0		11.493	0
11.503	0		11.518	319.894		11.512	0		11.51	0
11.519	0		11.534	0		11.529	0		11.526	207.761
11.536	205.645		11.551	327.478		11.545	0		11.543	216.355
11.552	0		11.568	235.256		11.562	352.428		11.559	0
11.569	0		11.584	309.283		11.579	255.063		11.576	0
11.586	0		11.601	211.34		11.595	0		11.592	328.54
11.602	256.817		11.617	306.137		11.612	271.396		11.609	270.249
11.619	246.706		11.634	208.78		11.628	0		11.626	0
11.635	0		11.65	239.037		11.645	0		11.642	0
11.652	0		11.667	0		11.661	261.586		11.659	0
11.668	0		11.684	0		11.678	0		11.675	309.059
11.685	0		11.7	275.002		11.695	0		11.692	242.458
11.702	0		11.717	412.703		11.711	204.409		11.708	0
11.718	0		11.733	204.646		11.728	0		11.725	0
11.735	0		11.75	260.41		11.744	251.342		11.742	0
11.751	0		11.766	267.012		11.761	209.52		11.758	277.316
11.768	0		11.783	344.458		11.777	235.973		11.775	0
11.784	0		11.8	349.7		11.794	0		11.791	343.408
11.801	0		11.816	268.315		11.811	0		11.808	221.76
11.818	0		11.833	0		11.827	0		11.824	314.353
11.834	0		11.849	0		11.844	0		11.841	0
11.851	262.614		11.866	297.561		11.86	0		11.858	0
11.867	0		11.882	394.978		11.877	206.741		11.874	0
11.884	0		11.899	268.507		11.893	255.087		11.891	0
11.9	0		11.916	0		11.91	0		11.907	204.189
11.917	0		11.932	280.551		11.927	0		11.924	0
11.934	339.877		11.949	247.672		11.943	218.961		11.94	0
11.95	0		11.965	326.666		11.96	284.967		11.957	0
11.967	0		11.982	0		11.976	304.649		11.974	241.816
11.983	0		11.998	249.959		11.993	0		11.99	0
12	0		12.015	0		12.009	0		12.007	0
12.017	230.402		12.032	289.788		12.026	0		12.023	0
12.033	0		12.048	213.265		12.043	0		12.04	246.628
12.05	0		12.065	382.392		12.059	384.721		12.056	0
12.066	248.921		12.081	233.743		12.076	0		12.073	0
12.083	0		12.098	210.902		12.092	0		12.09	0
12.099	0		12.114	452.82		12.109	0		12.106	0
12.116	0		12.131	296.071		12.125	222.249		12.123	0
12.133	0		12.148	0		12.142	0		12.139	0
12.149	0		12.164	458.798		12.159	0		12.156	0
12.166	0		12.181	0		12.175	315.374		12.172	219.622
12.182	269.906		12.197	0		12.192	0		12.189	245.812
12.199	0		12.214	283.093		12.208	0		12.206	0
12.215	228.772		12.23	0		12.225	246.802		12.222	307.886
12.232	0		12.247	327.332		12.241	224.275		12.239	232.471
12.249	0		12.264	202.978		12.258	270.745		12.255	205.144
12.265	237.338		12.28	389.267		12.275	0		12.272	202.949
12.282	267.02		12.297	302.239		12.291	386.58		12.289	263.229
12.298	0		12.313	0		12.308	0		12.305	0
12.315	0		12.33	0		12.324	0		12.322	0
12.331	262.532		12.346	0		12.341	0		12.338	259.661
12.348	0		12.363	332.025		12.357	0		12.355	0
12.365	0		12.38	236.974		12.374	0		12.371	225.265
12.381	0		12.396	374.232		12.391	0		12.388	0
12.398	0		12.413	0		12.407	0		12.405	246.655
12.414	398.865		12.429	256.734		12.424	0		12.421	250.687
12.431	0		12.446	334.22		12.44	0		12.438	0
12.447	275.115		12.463	244.1		12.457	0		12.454	217.457
12.464	0		12.479	221.702		12.473	0		12.471	0
12.481	0		12.496	0		12.49	0		12.487	238.359
12.497	0		12.512	256.206		12.507	307.791		12.504	0
12.514	0		12.529	262.539		12.523	213.586		12.521	0
12.53	521.572		12.545	462.003		12.54	0		12.537	207.414
12.547	0		12.562	0		12.556	0		12.554	0
12.563	266.722		12.579	205.115		12.573	0		12.57	0
12.58	0		12.595	251.005		12.589	0		12.587	0
12.597	0		12.612	280.672		12.606	0		12.603	0
12.613	0		12.628	379.758		12.623	0		12.62	344.011
12.63	0		12.645	293.606		12.639	219.706		12.637	0
12.646	0		12.661	233.029		12.656	281.961		12.653	0
12.663	0		12.678	479.497		12.672	0		12.67	0
12.679	0		12.695	231.732		12.689	276.328		12.686	241.149
12.696	249.096		12.711	0		12.706	0		12.703	0
12.713	267.517		12.728	278.955		12.722	256.441		12.719	0
12.729	0		12.744	273.574		12.739	0		12.736	232.75
12.746	455.203		12.761	224.971		12.755	0		12.753	0
12.762	365.748		12.777	215.331		12.772	0		12.769	203.338
12.779	0		12.794	209.264		12.788	0		12.786	0
12.795	0		12.811	287.638		12.805	0		12.802	368.223
12.812	0		12.827	359.996		12.822	250.43		12.819	0
12.829	256.924		12.844	407.458		12.838	0		12.835	276.502
12.845	201.54		12.86	266.374		12.855	0		12.852	0
12.862	0		12.877	230.144		12.871	208.52		12.869	268.779
12.878	379.339		12.893	0		12.888	0		12.885	0
12.895	0		12.91	341.114		12.904	0		12.902	221.118
12.911	0		12.927	362.475		12.921	0		12.918	0
12.928	0		12.943	285.128		12.938	0		12.935	0
12.945	0		12.96	0		12.954	0		12.951	284.315
12.961	449.647		12.976	0		12.971	0		12.968	258.239
12.978	0		12.993	0		12.987	0		12.985	0
12.994	0		13.009	469.589		13.004	0		13.001	0
13.011	397.326		13.026	0		13.02	0		13.018	0
13.027	0		13.043	0		13.037	231.843		13.034	296.659
13.044	0		13.059	343.241		13.054	0		13.051	288.352
13.061	0		13.076	207.495		13.07	0		13.067	0
13.077	0		13.092	258.073		13.087	225.66		13.084	0
13.094	0		13.109	0		13.103	253.592		13.101	211.436
13.11	0		13.125	359.094		13.12	299.045		13.117	246.865
13.127	0		13.142	354		13.136	0		13.134	0
13.143	0		13.159	404.862		13.153	247.492		13.15	227.623
13.16	0		13.175	263.682		13.17	276.844		13.167	0
13.177	0		13.192	282.217		13.186	0		13.183	0
13.193	244.836		13.208	292.721		13.203	334.029		13.2	278.468
13.21	0		13.225	485.578		13.219	0		13.217	0
13.226	298.882		13.241	274.257		13.236	0		13.233	228.424
13.243	0		13.258	216.747		13.252	0		13.25	298.927
13.26	258.446		13.275	299.422		13.269	0		13.266	0
13.276	0		13.291	0		13.286	0		13.283	306.648
13.293	284.422		13.308	0		13.302	0		13.299	271.929
13.309	231.922		13.324	503.695		13.319	0		13.316	0
13.326	0		13.341	0		13.335	0		13.333	0
13.342	0		13.357	244.725		13.352	0		13.349	223.267
13.359	0		13.374	227.243		13.368	0		13.366	0
13.376	0		13.391	0		13.385	319.302		13.382	0
13.392	0		13.407	281.296		13.402	244.832		13.399	0
13.409	267.846		13.424	295.835		13.418	0		13.415	237.943
13.425	0		13.44	269.27		13.435	0		13.432	0
13.442	341.498		13.457	217.387		13.451	0		13.449	273.785
13.458	0		13.473	0		13.468	0		13.465	0
13.475	0		13.49	0		13.484	0		13.482	0
13.492	0		13.507	253.114		13.501	0		13.498	0
13.508	434.823		13.523	0		13.518	0		13.515	234.054
13.525	0		13.54	325.5		13.534	0		13.532	0
13.541	0		13.556	222.326		13.551	0		13.548	218.921
13.558	0		13.573	355.696		13.567	0		13.565	226.371
13.574	243.828		13.589	274.208		13.584	321.861		13.581	228.895
13.591	0		13.606	323.279		13.6	0		13.598	210.373
13.608	365.746		13.623	212.109		13.617	0		13.614	315.303
13.624	285.737		13.639	264.483		13.634	253.909		13.631	0
13.641	0		13.656	0		13.65	0		13.648	265.334
13.657	0		13.672	262.172		13.667	0		13.664	281.207
13.674	248.011		13.689	239.096		13.683	218.679		13.681	0
13.69	0		13.706	325.205		13.7	383.993		13.697	213.816
13.707	0		13.722	288.102		13.716	0		13.714	243.817
13.724	276.804		13.739	0		13.733	0		13.73	0
13.74	0		13.755	0		13.75	206.799		13.747	0
13.757	255.961		13.772	0		13.766	0		13.764	0
13.773	0		13.788	234.978		13.783	0		13.78	342.422
13.79	217.255		13.805	0		13.799	0		13.797	0
13.806	0		13.822	389.27		13.816	284.241		13.813	0
13.823	0		13.838	334.231		13.832	0		13.83	0
13.84	246.643		13.855	321.128		13.849	0		13.846	0
13.856	0		13.871	257.434		13.866	0		13.863	272.706
13.873	0		13.888	433.194		13.882	237.727		13.88	0
13.889	311.9		13.904	265.199		13.899	0		13.896	0
13.906	337.408		13.921	310.375		13.915	0		13.913	0
13.922	245.133		13.938	0		13.932	0		13.929	0
13.939	0		13.954	382.45		13.949	0		13.946	215.924
13.956	0		13.971	265.78		13.965	0		13.962	0
13.972	0		13.987	430.092		13.982	208.058		13.979	207.368
13.989	0		14.004	269.162		13.998	231.982		13.996	0
14.005	0		14.02	279.423		14.015	0		14.012	0
14.022	0		14.037	0		14.031	207.705		14.029	0
14.038	0		14.054	0		14.048	0		14.045	332.266
14.055	0		14.07	268.197		14.065	0		14.062	0
14.072	0		14.087	221.102		14.081	0		14.078	384.315
14.088	0		14.103	204.481		14.098	0		14.095	0
14.105	0		14.12	0		14.114	309.963		14.112	235.023
14.121	0		14.136	262.695		14.131	0		14.128	0
14.138	312.946		14.153	427.92		14.147	256.223		14.145	0
14.154	0		14.17	309.049		14.164	0		14.161	0
14.171	0		14.186	0		14.181	0		14.178	0
14.188	0		14.203	270.165		14.197	288.613		14.194	289.292
14.204	424.146		14.219	453.703		14.214	0		14.211	0
14.221	223.303		14.236	246.214		14.23	278.831		14.228	226.442
14.237	0		14.252	285.907		14.247	251.43		14.244	327.031
14.254	273.909		14.269	227.15		14.263	0		14.261	204.148
14.27	224.44		14.286	208.685		14.28	302.698		14.277	0
14.287	0		14.302	0		14.297	0		14.294	334.626
14.304	203.321		14.319	201.815		14.313	0		14.31	0
14.32	0		14.335	275.794		14.33	0		14.327	297.374
14.337	0		14.352	208.065		14.346	0		14.344	0
14.353	0		14.368	0		14.363	288.654		14.36	0
14.37	0		14.385	0		14.379	0		14.377	271.432
14.386	0		14.402	494.071		14.396	0		14.393	0
14.403	241.642		14.418	207.881		14.413	0		14.41	0
14.42	0		14.435	200.399		14.429	0		14.426	251.987
14.436	0		14.451	284.962		14.446	0		14.443	410.616
14.453	0		14.468	0		14.462	201.54		14.46	333.448
14.469	0		14.484	373.97		14.479	0		14.476	296.642
14.486	0		14.501	308.04		14.495	0		14.493	467.369
14.503	0		14.518	234.949		14.512	0		14.509	285.084
14.519	0		14.534	232.409		14.529	0		14.526	371.66
14.536	212.082		14.551	246.95		14.545	0		14.542	386.099
14.552	241.316		14.567	0		14.562	0		14.559	485.694
14.569	0		14.584	0		14.578	0		14.576	417.211
14.585	0		14.6	202.131		14.595	235.548		14.592	232.486
14.602	0		14.617	219.159		14.611	0		14.609	214.539
14.619	0		14.634	378.385		14.628	0		14.625	225.27
14.635	262.028		14.65	271.058		14.645	212.481		14.642	313.383
14.652	0		14.667	0		14.661	272.204		14.658	490.411
14.668	0		14.683	212.342		14.678	231.348		14.675	486.784
14.685	0		14.7	0		14.694	0		14.692	438.937
14.701	207.117		14.716	231.643		14.711	0		14.708	426.736
14.718	0		14.733	214.654		14.727	0		14.725	340.943
14.735	0		14.75	234.297		14.744	0		14.741	715.597
14.751	0		14.766	319.95		14.761	263.814		14.758	331.838
14.768	0		14.783	239.005		14.777	0		14.775	620.396
14.784	0		14.799	212.735		14.794	0		14.791	625.326
14.801	0		14.816	275.442		14.81	324.002		14.808	718.979
14.817	0		14.832	241.497		14.827	0		14.824	679.691
14.834	0		14.849	332.609		14.843	0		14.841	742.851
14.851	0		14.866	0		14.86	0		14.857	674.158
14.867	0		14.882	365.578		14.877	560.178		14.874	576.75
14.884	0		14.899	381.943		14.893	668.719		14.891	556.746
14.9	0		14.915	0		14.91	773.973		14.907	691.6
14.917	0		14.932	326.893		14.926	374.988		14.924	534.905
14.933	251.924		14.949	242.465		14.943	0		14.94	596.699
14.95	0		14.965	392.209		14.959	0		14.957	877.782
14.967	298.216		14.982	0		14.976	0		14.973	599.367
14.983	391.335		14.998	0		14.993	503.017		14.99	583.122
15	0		15.015	0		15.009	0		15.007	663.81
15.016	552.197		15.031	369.961		15.026	735.923		15.023	382.059
15.033	0		15.048	371.164		15.042	0		15.04	469.038
15.049	339.081		15.065	237.061		15.059	684.956		15.056	667.514
15.066	647.134		15.081	433.737		15.075	748.336		15.073	604.918
15.083	570.114		15.098	413.308		15.092	0		15.089	719.994
15.099	0		15.114	486.48		15.109	550.219		15.106	606.08
15.116	0		15.131	445.463		15.125	786.942		15.123	765.459
15.132	601.399		15.147	461.012		15.142	605.907		15.139	825.928
15.149	557.295		15.164	636.331		15.158	0		15.156	617.561
15.165	0		15.181	496.841		15.175	0		15.172	980.685
15.182	576.191		15.197	533.16		15.192	552.476		15.189	465.92
15.199	0		15.214	725.853		15.208	784.883		15.205	725.932
15.215	545.797		15.23	612.956		15.225	508.844		15.222	710.816
15.232	866.399		15.247	434.884		15.241	549.027		15.239	645.57
15.248	577.012		15.263	482.117		15.258	962.883		15.255	473.987
15.265	698.572		15.28	803.107		15.274	633.448		15.272	696.088
15.281	871.625		15.297	796.702		15.291	571.85		15.288	558.917
15.298	0		15.313	782.334		15.308	601.549		15.305	667.896
15.315	962.397		15.33	978.044		15.324	0		15.321	447.07
15.331	1180.28		15.346	1224.73		15.341	725.491		15.338	614.865
15.348	0		15.363	1094.56		15.357	0		15.355	713.391
15.364	1152.33		15.379	1096.14		15.374	684.996		15.371	320.045
15.381	1338.95		15.396	1031.91		15.39	0		15.388	644.29
15.397	1026.16		15.413	1299.29		15.407	617.256		15.404	695.942
15.414	1033.86		15.429	1368.42		15.424	604.556		15.421	551.826
15.431	1389.07		15.446	1529.58		15.44	0		15.437	276.11
15.447	1122.09		15.462	1576.32		15.457	706.703		15.454	496.369
15.464	825.553		15.479	1560.09		15.473	434.298		15.471	1019.02
15.48	1118.21		15.495	1947.76		15.49	604.589		15.487	818.921
15.497	805.501		15.512	1382.64		15.506	0		15.504	746.506
15.513	952.03		15.529	1363.96		15.523	0		15.52	902.795
15.53	0		15.545	1517.53		15.54	473.709		15.537	1063.69
15.547	1381.37		15.562	1684.98		15.556	0		15.553	979.125
15.563	1189.07		15.578	1805.03		15.573	692.756		15.57	983.253
15.58	1079.21		15.595	1389.87		15.589	643.364		15.587	973.171
15.596	1227.57		15.611	1431.59		15.606	1166.99		15.603	943.996
15.613	1094.09		15.628	1225.09		15.622	657.038		15.62	1276.19
15.629	1117.77		15.645	1083.96		15.639	710.214		15.636	1161.01
15.646	1429.1		15.661	1228.77		15.656	741.571		15.653	912.995
15.663	1576.55		15.678	1143.18		15.672	0		15.669	1151.4
15.679	1467.11		15.694	1257.74		15.689	0		15.686	1116.94
15.696	1177.74		15.711	1258.09		15.705	594.774		15.703	1077.96
15.712	0		15.727	1514.26		15.722	604.209		15.719	845.938
15.729	0		15.744	1330.16		15.738	0		15.736	1309.77
15.746	1112.74		15.761	1345.88		15.755	738.921		15.752	1365.73
15.762	1471.73		15.777	1204.99		15.772	0		15.769	1047.92
15.779	0		15.794	1415.41		15.788	738.241		15.785	1017.39
15.795	1547.63		15.81	1424.32		15.805	826.579		15.802	1118.61
15.812	1492.39		15.827	1320.69		15.821	919.6		15.819	860.179
15.828	2097.37		15.843	1331.6		15.838	1079.41		15.835	1412.3
15.845	2400.2		15.86	1292.69		15.854	1285.96		15.852	946.949
15.862	1861.37		15.877	1422.99		15.871	909.998		15.868	902.919
15.878	1924.77		15.893	1770.71		15.888	643.421		15.885	1447.59
15.895	2845.07		15.91	1495.41		15.904	803.184		15.901	1473.95
15.911	3181.31		15.926	1832.59		15.921	699.905		15.918	1665.72
15.928	3503.28		15.943	1876.56		15.937	1157.18		15.935	853.642
15.944	3821.84		15.959	1701.98		15.954	977.313		15.951	1121.79
15.961	3941.94		15.976	1864.56		15.97	1088.51		15.968	901.638
15.978	4734.78		15.993	2291.95		15.987	845.284		15.984	1591.66
15.994	5386.3		16.009	2643.57		16.004	0		16.001	1484.55
16.011	7557.2		16.026	2094.55		16.02	893.693		16.018	1289.89
16.027	8686.51		16.042	2174.14		16.037	1062.27		16.034	1072.95
16.044	8428.73		16.059	2647.83		16.053	1631.6		16.051	1181.16
16.06	9909.51		16.075	2926.8		16.07	984.102		16.067	1585.53
16.077	10341.1		16.092	3907.55		16.086	907.994		16.084	1636.26
16.094	10300.5		16.109	4133.74		16.103	1195.33		16.1	1357.28
16.11	12765.9		16.125	4733.5		16.12	1142.02		16.117	1432.38
16.127	12907.1		16.142	5553.44		16.136	1191.95		16.134	1559.02
16.143	14233.3		16.158	7044.04		16.153	1372.01		16.15	1369.17
16.16	16205.4		16.175	7483.66		16.169	1431.59		16.167	1955.02
16.176	14991.8		16.191	7785.05		16.186	0		16.183	1617.77
16.193	17419		16.208	10230.5		16.202	1014.83		16.2	1789.68
16.21	17777.8		16.225	10682.6		16.219	1152.47		16.216	1590.43
16.226	19213.1		16.241	11851		16.236	1004.02		16.233	2028.67
16.243	21225.6		16.258	13046.4		16.252	1125.56		16.25	2134.41
16.259	21794.8		16.274	13545.6		16.269	1563.39		16.266	1991.61
16.276	23129.8		16.291	15190.6		16.285	1246.27		16.283	2177.66
16.292	24066.8		16.308	17505.9		16.302	0		16.299	1930.55
16.309	25173.1		16.324	17939		16.318	1050.82		16.316	2202.31
16.326	25839.9		16.341	19846.6		16.335	0		16.332	2414.72
16.342	27951.4		16.357	23003		16.352	1176.8		16.349	2840.94
16.359	28941		16.374	24443.1		16.368	0		16.366	2470.39
16.375	30664		16.39	25550		16.385	1826.16		16.382	2772.12
16.392	30454.9		16.407	28012.4		16.401	1265.18		16.399	2422.21
16.408	33021.5		16.424	29321.7		16.418	1747.98		16.415	3010.85
16.425	32137.5		16.44	32487.2		16.435	1593.84		16.432	3272.02
16.442	35208.5		16.457	32849.8		16.451	1173.91		16.448	3889.12
16.458	36265.2		16.473	34391		16.468	1744		16.465	3311.38
16.475	35014.2		16.49	38679.9		16.484	1801.18		16.482	3491.88
16.491	37058.2		16.506	38866.5		16.501	0		16.498	3325.62
16.508	35438.4		16.523	39445.3		16.517	1670.01		16.515	3550.93
16.524	39605		16.54	42134.8		16.534	1824.35		16.531	3723.8
16.541	40692.1		16.556	41098.3		16.551	1725.55		16.548	3497.26
16.558	37601.6		16.573	44059.6		16.567	1751.97		16.564	4543.22
16.574	38703.7		16.589	44612.9		16.584	1881.55		16.581	4164.23
16.591	41315.4		16.606	45471.4		16.6	2296.22		16.598	4421.77
16.607	39977.2		16.622	43696.6		16.617	1899.43		16.614	4351.98
16.624	40653.4		16.639	45163.6		16.633	2156.56		16.631	3929.44
16.64	40873.3		16.656	46669.5		16.65	0		16.647	4146.34
16.657	37142.1		16.672	45941.3		16.667	1949.73		16.664	4613.06
16.674	39748.1		16.689	47257.2		16.683	0		16.68	4160.76
16.69	39535.4		16.705	47124.5		16.7	2344.08		16.697	4499.29
16.707	36713.3		16.722	45639.8		16.716	2745.75		16.714	4393.48
16.723	36808.9		16.738	43754.2		16.733	2249.18		16.73	4254.52
16.74	37504.5		16.755	41184.3		16.749	2632.26		16.747	3885.07
16.756	38460		16.772	41564.8		16.766	2722.6		16.763	4022.85
16.773	37109.4		16.788	42168.5		16.783	2679.95		16.78	3970.85
16.79	35572		16.805	39377.5		16.799	0		16.796	4595.44
16.806	33958.1		16.821	38996		16.816	3380.51		16.813	4599.93
16.823	32953.2		16.838	37994.4		16.832	2841.55		16.83	4183.09
16.839	33978.9		16.854	35400.1		16.849	3116.35		16.846	3903.69
16.856	32406.2		16.871	36536.8		16.865	3664.34		16.863	4893.11
16.872	32078.5		16.888	36907		16.882	3595.33		16.879	4298.03
16.889	29755.7		16.904	34135.8		16.899	3323.31		16.896	3941.06
16.906	29938		16.921	33303.1		16.915	3591.33		16.912	4359.32
16.922	27678.4		16.937	33073.1		16.932	4295.13		16.929	4283.78
16.939	26640.4		16.954	30573.4		16.948	3129.44		16.946	3911.82
16.955	28292.4		16.97	30360.8		16.965	3551.2		16.962	4265.86
16.972	26450.5		16.987	28447.5		16.981	4315.12		16.979	4091.38
16.989	25387.9		17.004	27367.2		16.998	4021.42		16.995	3836.62
17.005	22833.2		17.02	26200.7		17.015	4290.19		17.012	3618.41
17.022	23937		17.037	26300.5		17.031	0		17.028	4172.62
17.038	23709		17.053	25999.8		17.048	4107.27		17.045	3535.41
17.055	23313		17.07	23437.2		17.064	0		17.062	3732.24
17.071	22858.3		17.086	23431.7		17.081	4058.49		17.078	3174.58
17.088	22019.5		17.103	24427.9		17.097	4131.5		17.095	3940.11
17.105	19821.1		17.12	22331.2		17.114	4396.83		17.111	3633.39
17.121	18683.2		17.136	22202.7		17.131	4542.26		17.128	3289.9
17.138	19072.2		17.153	21744.5		17.147	4383.97		17.144	4013.47
17.154	17857.3		17.169	19122.5		17.164	4301.19		17.161	3317.72
17.171	17156.8		17.186	19774.4		17.18	4580.12		17.178	3544.64
17.187	17563.9		17.202	18069.7		17.197	4865.46		17.194	2849.37
17.204	17031.2		17.219	17554.3		17.213	4746.93		17.211	2954.15
17.221	16758.2		17.236	17219.5		17.23	5202.87		17.227	3018.41
17.237	15322.2		17.252	17676.4		17.247	4453.22		17.244	3137.98
17.254	15278.5		17.269	17263.2		17.263	4710.54		17.261	2755.68
17.27	15332.1		17.285	14619.9		17.28	4601.26		17.277	2836.47
17.287	0		17.302	15989		17.296	4346.96		17.294	2961.56
17.303	14147.1		17.318	13352.5		17.313	4064.93		17.31	2926.42
17.32	13763.5		17.335	14462		17.329	4593.22		17.327	3225.93
17.337	14049.2		17.352	14079.1		17.346	4576.56		17.343	2434.16
17.353	11843		17.368	14260.3		17.363	4197.04		17.36	2711.08
17.37	13100.1		17.385	12351		17.379	4711.89		17.377	2878.25
17.386	0		17.401	13429.9		17.396	4499.67		17.393	2458.67
17.403	10814.1		17.418	13068.2		17.412	4833.58		17.41	2484.3
17.419	11599.8		17.434	12513.6		17.429	4009.34		17.426	2790.39
17.436	11548		17.451	11042.8		17.445	4308.4		17.443	2012.08
17.453	10631.4		17.468	10941		17.462	4208.24		17.459	2499.11
17.469	10203.4		17.484	11664.5		17.479	4691.21		17.476	2329.32
17.486	10053.9		17.501	10078.4		17.495	3454.65		17.493	2656.28
17.502	9231.95		17.517	9570.44		17.512	3790.13		17.509	2453.74
17.519	9471.06		17.534	10255.5		17.528	3888.78		17.526	2363.32
17.535	9194.74		17.551	9451.88		17.545	4005.46		17.542	2059.41
17.552	8538.47		17.567	9013.07		17.561	3714.44		17.559	2395.55
17.569	9038.93		17.584	9125.01		17.578	4035.99		17.575	2181.07
17.585	8755.22		17.6	8965.21		17.595	4142.6		17.592	1882.96
17.602	8975.6		17.617	7403.19		17.611	3949.82		17.609	2067.33
17.618	8217.55		17.633	7359.95		17.628	0		17.625	1994.01
17.635	7937.34		17.65	9002.04		17.644	3764.19		17.642	2150.8
17.651	7742.04		17.667	8268.62		17.661	3757.86		17.658	1757.05
17.668	7861.3		17.683	8045.53		17.678	3763.38		17.675	2258.14
17.685	7512.99		17.7	7894.13		17.694	3799.12		17.691	1875.19
17.701	7057.46		17.716	7730.04		17.711	3070.01		17.708	2105.22
17.718	6772.41		17.733	8099.53		17.727	2956.68		17.725	1718.49
17.734	6654.98		17.749	7379.15		17.744	0		17.741	2579.34
17.751	5853.48		17.766	7204.54		17.76	3584.66		17.758	2039.9
17.767	6184.78		17.783	6550.08		17.777	3307.09		17.774	2088.99
17.784	6344.9		17.799	7182.3		17.794	2891.02		17.791	2141.46
17.801	6640.14		17.816	6639.26		17.81	3501		17.807	2220.45
17.817	6536.42		17.832	6786.03		17.827	3385.85		17.824	1860.69
17.834	5897.95		17.849	6164.7		17.843	3234.09		17.841	1760.9
17.85	5649.82		17.865	6218.07		17.86	0		17.857	1754.28
17.867	5451.86		17.882	6855.53		17.876	2541.5		17.874	1742.65
17.883	5232.94		17.899	5989.52		17.893	2874.49		17.89	1921
17.9	5443.35		17.915	5683.13		17.91	3284.41		17.907	1721.79
17.917	0		17.932	6190.55		17.926	3024.89		17.923	1984.42
17.933	5492.31		17.948	5390.62		17.943	2935.58		17.94	2070.74
17.95	4271.88		17.965	5863.56		17.959	2882.44		17.957	1875.78
17.966	5275.24		17.981	5666.52		17.976	2992.36		17.973	2148.18
17.983	5002.77		17.998	5442.03		17.992	2775.4		17.99	1864.6
17.999	4708.8		18.015	5673.88		18.009	2858.73		18.006	2079.5
18.016	4765.24		18.031	5697.94		18.026	0		18.023	2141.01
18.033	4565.79		18.048	5253.6		18.042	2491.07		18.039	2215.85
18.049	5021.62		18.064	5224.76		18.059	2737.7		18.056	2265.65
18.066	5382.8		18.081	5276.63		18.075	2570.96		18.073	2200.36
18.082	5004.57		18.097	5813.95		18.092	3119.69		18.089	2495.86
18.099	5080.48		18.114	5439.39		18.108	2591.79		18.106	2408.45
18.115	4184.6		18.131	5783.96		18.125	2367.26		18.122	2529.96
18.132	5015.62		18.147	6005.37		18.142	2605.88		18.139	2386.57
18.149	4548.55		18.164	4797.07		18.158	2654.1		18.155	2266.34
18.165	4921.19		18.18	4860.54		18.175	2636.96		18.172	1932.03
18.182	5199.41		18.197	5152.04		18.191	0		18.189	1912.59
18.198	4141.04		18.213	4938.51		18.208	2153.05		18.205	2096.26
18.215	4094.71		18.23	4509.18		18.224	1873.94		18.222	2139.11
18.231	4102.11		18.247	5266.5		18.241	0		18.238	2139.88
18.248	4616.9		18.263	5001.15		18.258	2097.36		18.255	2405.43
18.265	4812.35		18.28	4738.4		18.274	2256.95		18.271	2283.95
18.281	4593.26		18.296	4588.75		18.291	1809.49		18.288	2243.29
18.298	4073.85		18.313	4369.58		18.307	0		18.305	2171.92
18.314	4163.64		18.329	3957.94		18.324	2161.37		18.321	2412.08
18.331	4194.39		18.346	4281.84		18.34	1907.39		18.338	2386.83
18.348	4244.64		18.363	3745.6		18.357	2090.99		18.354	2341.87
18.364	4466.81		18.379	3882.22		18.374	1889.06		18.371	2263.24
18.381	3851.53		18.396	4036.12		18.39	2151.38		18.387	2090.61
18.397	4018.45		18.412	4794.89		18.407	0		18.404	2648.88
18.414	3703.64		18.429	3777.1		18.423	0		18.421	2028.76
18.43	0		18.445	4705.21		18.44	2096.82		18.437	2099.12
18.447	4296.65		18.462	4456.79		18.456	0		18.454	2202.18
18.464	4085.24		18.479	3943.14		18.473	1894.96		18.47	2486.85
18.48	4291.85		18.495	4599.16		18.49	1699.23		18.487	2654.12
18.497	4121.78		18.512	3745.34		18.506	2388.41		18.504	2580.12
18.513	3808.23		18.528	4261.54		18.523	0		18.52	2409.51
18.53	4253.01		18.545	4217.54		18.539	2118.43		18.537	2516.78
18.546	4448.69		18.561	4249.65		18.556	1768.95		18.553	3138.01
18.563	3494.83		18.578	3965.97		18.572	1861.82		18.57	2562.21
18.58	0		18.595	4138.25		18.589	0		18.586	2086.01
18.596	3572.71		18.611	4056.99		18.606	2188.57		18.603	2795.58
18.613	4123.81		18.628	3741.89		18.622	1741.56		18.62	2405.93
18.629	3535.45		18.644	3358.82		18.639	1967.92		18.636	2101.5
18.646	3876.88		18.661	4170.1		18.655	2409.55		18.653	2392.28
18.662	3898.92		18.677	3378.64		18.672	1888.06		18.669	2799.24
18.679	3796.25		18.694	3846.59		18.688	1738.5		18.686	2548.81
18.696	3735.5		18.711	3665.39		18.705	1785.49		18.702	1977.24
18.712	3661.43		18.727	4017.84		18.722	1892.19		18.719	2468.74
18.729	3575.86		18.744	4015.98		18.738	1664.38		18.736	2678.48
18.745	3916.88		18.76	3808.62		18.755	2159.53		18.752	2482.92
18.762	3661.31		18.777	4124.59		18.771	1845.21		18.769	2798.19
18.778	2768.43		18.794	3781.4		18.788	0		18.785	2025.06
18.795	0		18.81	3706.45		18.804	1645		18.802	2550.03
18.812	3659.03		18.827	3117.31		18.821	0		18.818	2300.29
18.828	3826.13		18.843	3413.6		18.838	1528.98		18.835	2516.23
18.845	3320.48		18.86	2714.63		18.854	1764.74		18.852	2466.21
18.861	3650.1		18.876	3381.04		18.871	1356.76		18.868	2350.77
18.878	3097.02		18.893	3245.92		18.887	2055.64		18.885	2450.97
18.894	2730.55		18.91	3000.28		18.904	2075.29		18.901	2669.67
18.911	0		18.926	3251.21		18.92	0		18.918	2560.02
18.928	3066.07		18.943	3631.87		18.937	1750.76		18.934	1795.31
18.944	3082.97		18.959	3297.27		18.954	2368.94		18.951	2631.81
18.961	2724.26		18.976	2918.57		18.97	1605.42		18.968	2176.89
18.977	0		18.992	3152.39		18.987	2038.22		18.984	2429.26
18.994	2698.52		19.009	2799.2		19.003	1801.76		19.001	2633.03
19.01	3631.01		19.026	3407.81		19.02	1796.68		19.017	2628.04
19.027	3496.19		19.042	3233.96		19.037	1895.72		19.034	2495.61
19.044	3356.91		19.059	3560		19.053	2095.83		19.05	2097.65
19.06	2886.64		19.075	3051.53		19.07	1683.06		19.067	2525.56
19.077	3124.48		19.092	2715.51		19.086	1881.96		19.084	2377.15
19.093	0		19.108	2680.17		19.103	0		19.1	2445.42
19.11	3581.65		19.125	3008.18		19.119	1772.95		19.117	2177.01
19.126	3161.34		19.142	2630.6		19.136	1688		19.133	2970.29
19.143	3344.3		19.158	2844.67		19.153	0		19.15	2464.86
19.16	3358.33		19.175	2556.03		19.169	1615.78		19.166	2348.31
19.176	2970.47		19.191	2610.76		19.186	2043.19		19.183	2551.63
19.193	2383.88		19.208	2549.19		19.202	1914.85		19.2	2566.33
19.209	2849.05		19.224	2804.08		19.219	1691.51		19.216	3007.22
19.226	2459.97		19.241	3240.68		19.235	2010.11		19.233	2306.42
19.242	2870.25		19.258	3165.75		19.252	1920.16		19.249	2294.05
19.259	2548.8		19.274	2503.12		19.269	1822.52		19.266	2364.2
19.276	2531.21		19.291	2802.66		19.285	2398.62		19.282	2331.13
19.292	3116.6		19.307	2632.81		19.302	1644.29		19.299	2503.03
19.309	2824.06		19.324	2622.06		19.318	2439.87		19.316	2502.73
19.325	0		19.34	2383.07		19.335	1849.28		19.332	2228.14
19.342	2515.45		19.357	2324.1		19.351	1771.99		19.349	2342.15
19.358	2908.03		19.374	2302.5		19.368	2394.48		19.365	2017.07
19.375	2639.58		19.39	2933.36		19.385	1839.46		19.382	2382.86
19.392	2971.74		19.407	2201.82		19.401	2029.4		19.398	2185.96
19.408	2726.35		19.423	2366.26		19.418	1862.56		19.415	2569.77
19.425	2113.62		19.44	2097.23		19.434	1800.19		19.432	2478.01
19.441	2573.81		19.456	2291.72		19.451	2279.47		19.448	1963.51
19.458	2160.63		19.473	2336.65		19.467	2308.78		19.465	2343.86
19.474	2742.85		19.49	3017.3		19.484	2173.74		19.481	2374.77
19.491	2826.18		19.506	2238.72		19.501	1967.77		19.498	2369.74
19.508	2724.17		19.523	2461.49		19.517	2107.13		19.514	2011.89
19.524	0		19.539	2640.75		19.534	2221.11		19.531	1577.31
19.541	2619.98		19.556	2329.07		19.55	1770.31		19.548	2212.46
19.557	0		19.572	2913.52		19.567	2120.16		19.564	1836.54
19.574	2874.96		19.589	2655.06		19.583	2162.9		19.581	2304.23
19.591	2997.74		19.606	2586.52		19.6	2092.21		19.597	2502.74
19.607	2699.56		19.622	2426.64		19.617	0		19.614	2158.03
19.624	0		19.639	2949.86		19.633	2014.96		19.63	2202.43
19.64	2846.27		19.655	2799.18		19.65	0		19.647	1964.71
19.657	3000.28		19.672	2560.61		19.666	2697.07		19.664	1861.08
19.673	3056.97		19.688	2225.85		19.683	0		19.68	2416.71
19.69	2838.77		19.705	2893.76		19.699	1746.28		19.697	2705.69
19.707	2583.39		19.722	2763.86		19.716	1919.51		19.713	2588.75
19.723	3212.75		19.738	2610.27		19.733	1809.31		19.73	2391.97
19.74	2248.31		19.755	2578.27		19.749	2500.33		19.746	2754.73
19.756	2815.03		19.771	2728.61		19.766	2580.21		19.763	3095.19
19.773	3107.24		19.788	2645.51		19.782	2058.94		19.78	2841.45
19.789	2370.84		19.804	2153.35		19.799	2662.63		19.796	2467.34
19.806	2992.63		19.821	2360.96		19.815	2504.77		19.813	3003.52
19.823	2666.23		19.838	2341.38		19.832	2389.62		19.829	3426.2
19.839	3048.11		19.854	2691.49		19.849	2543.44		19.846	3223.01
19.856	2689.24		19.871	2963.58		19.865	2506.49		19.863	3418.37
19.872	0		19.887	2655.26		19.882	2649.82		19.879	3807.33
19.889	2744.07		19.904	2510.79		19.898	2242.57		19.896	4314.42
19.905	2655.18		19.92	2006.08		19.915	2044.16		19.912	4446.63
19.922	2208.15		19.937	2497.8		19.931	2246.05		19.929	4950.92
19.939	2771.77		19.954	2104.91		19.948	2823.99		19.945	4946.75
19.955	2783.27		19.97	2453.3		19.965	2781.87		19.962	5175.12
19.972	2595.03		19.987	2309.56		19.981	2812.3		19.979	5170.9
19.988	0		20.003	2266.34		19.998	2896.01		19.995	5012.69
20.005	3163.93		20.02	2659.5		20.014	2603.49		20.012	5490.87
20.021	0		20.037	2547.18		20.031	2670.91		20.028	5820.58
20.038	0		20.053	2678.49		20.047	3146.71		20.045	6212.39
20.055	2888.42		20.07	2851.96		20.064	2969.06		20.061	6014.52
20.071	3248.53		20.086	2718.28		20.081	3534.75		20.078	6137.22
20.088	3794.86		20.103	2804.7		20.097	3088.41		20.095	5734.69
20.104	3720.86		20.119	2570.61		20.114	2994.12		20.111	5875.01
20.121	3451.76		20.136	3385.4		20.13	3335.79		20.128	6903.48
20.137	3698.92		20.153	3142.63		20.147	2944.19		20.144	6309.97
20.154	3860.78		20.169	3335.07		20.163	2874.22		20.161	6016.06
20.171	3370.97		20.186	3436.29		20.18	3088.47		20.177	6038.6
20.187	3500.41		20.202	2947.89		20.197	2450.4		20.194	5920.9
20.204	3450.5		20.219	2590.36		20.213	3060.65		20.211	6133.86
20.22	3901.63		20.235	3307.84		20.23	2696.2		20.227	6100.84
20.237	3440.79		20.252	3270.85		20.246	2957.51		20.244	5937.03
20.253	4033.13		20.269	3411.47		20.263	2763.87		20.26	6473.51
20.27	3243.29		20.285	3739.39		20.28	3182.28		20.277	6275.02
20.287	3509.03		20.302	3574.68		20.296	3261.6		20.293	6073.55
20.303	3612.78		20.318	3325.34		20.313	2705.71		20.31	6776.02
20.32	3863.49		20.335	3642.07		20.329	2693.57		20.327	5837.82
20.336	3799.85		20.351	3698.61		20.346	2688.32		20.343	6629.04
20.353	3591.63		20.368	3466.31		20.362	0		20.36	5452.54
20.369	3807.28		20.385	3632.79		20.379	0		20.376	5948.61
20.386	3661.34		20.401	3643.76		20.396	3059.98		20.393	5755.08
20.403	3595.62		20.418	3289.91		20.412	0		20.409	5914.32
20.419	3372.48		20.434	3387.78		20.429	0		20.426	6145.82
20.436	0		20.451	3081.35		20.445	2597.3		20.443	5365.92
20.452	2721.33		20.467	2975.87		20.462	2693.35		20.459	5155.36
20.469	3408.89		20.484	3723.63		20.478	2304.07		20.476	5468.48
20.485	3751.78		20.501	3488.56		20.495	2546.53		20.492	5927.05
20.502	3496.14		20.517	3462.82		20.512	2994.69		20.509	5567.06
20.519	3619.86		20.534	2944.9		20.528	2672.96		20.525	5011.49
20.535	2876.69		20.55	2821.88		20.545	2550.35		20.542	5330.39
20.552	3322.32		20.567	2727.1		20.561	2708.29		20.559	5311.64
20.568	3081.92		20.583	2266.8		20.578	2601.09		20.575	5371.13
20.585	2869.94		20.6	2889.06		20.594	2866.44		20.592	6068.37
20.601	3295.96		20.617	3608.69		20.611	2186.89		20.608	5350.74
20.618	2863.16		20.633	2241.06		20.628	2580.98		20.625	4527.11
20.635	3252.78		20.65	2653.5		20.644	2691.47		20.641	5427.43
20.651	2985.77		20.666	2355.93		20.661	2251		20.658	5550.7
20.668	3100.06		20.683	2722.4		20.677	0		20.675	4874.33
20.684	2454.54		20.699	2926.38		20.694	2485.18		20.691	5637.64
20.701	0		20.716	2536		20.71	2372.76		20.708	5799.41
20.717	0		20.733	2884.1		20.727	2584.49		20.724	6184.86
20.734	2440.36		20.749	3156.25		20.744	2164.61		20.741	5724.85
20.751	2261.9		20.766	3900.13		20.76	2446.44		20.757	6047.53
20.767	2367.93		20.782	4151.99		20.777	2639.99		20.774	6300.36
20.784	2812.86		20.799	4274.43		20.793	2797.74		20.791	5576.62
20.8	2395.88		20.815	4948.11		20.81	2185.5		20.807	5959.08
20.817	2756.36		20.832	4892.93		20.826	2312.02		20.824	5627.42
20.834	0		20.849	5780.62		20.843	2144.8		20.84	5837.09
20.85	2931.8		20.865	5276.17		20.86	0		20.857	5905.71
20.867	3422.94		20.882	5129.27		20.876	2147.13		20.873	7143.86
20.883	3080.19		20.898	4841.46		20.893	2235.34		20.89	5588.07
20.9	3755.15		20.915	4688.93		20.909	2097.64		20.907	5435.08
20.916	0		20.931	5121.14		20.926	2590.46		20.923	5599.01
20.933	3728.44		20.948	5999.49		20.942	3024.69		20.94	6707.68
20.95	3696.39		20.965	4648.38		20.959	1915.75		20.956	5659.15
20.966	4100.44		20.981	5394.58		20.976	2026.71		20.973	5498.14
20.983	4495.81		20.998	5634.38		20.992	2079.31		20.989	5323.44
20.999	4104.64		21.014	5938.32		21.009	2011.12		21.006	4846.47
21.016	3353.18		21.031	5036.09		21.025	2530.95		21.023	5923.76
21.032	3451.46		21.047	5804		21.042	1903.73		21.039	5503.23
21.049	3587.43		21.064	5165.74		21.058	2455.49		21.056	5601.72
21.066	3615.6		21.081	6178.63		21.075	2177.29		21.072	5202.48
21.082	3176.47		21.097	4856.62		21.092	0		21.089	5554.57
21.099	3335.25		21.114	5907.63		21.108	2245.77		21.106	5617.81
21.115	3671.81		21.13	5163.6		21.125	2087.32		21.122	5226.44
21.132	3205.7		21.147	5025.73		21.141	1871.69		21.139	5170.72
21.148	3374.62		21.163	4466.3		21.158	1852.04		21.155	5001.99
21.165	3405.19		21.18	4673.73		21.174	1923.39		21.172	4575.56
21.182	2915.04		21.197	5819.77		21.191	2360.94		21.188	5015.19
21.198	3544.36		21.213	4750.15		21.208	1759.76		21.205	4818.94
21.215	2986.21		21.23	5657		21.224	2309.5		21.222	5160.77
21.231	2556.22		21.246	5430.58		21.241	2241.32		21.238	4837.3
21.248	2405.21		21.263	5574.59		21.257	1842		21.255	4564.52
21.264	2966.63		21.28	5316.42		21.274	0		21.271	5097.52
21.281	2582.47		21.296	5271.25		21.29	1742.34		21.288	4645.75
21.298	2451.49		21.313	5416.95		21.307	1966.38		21.304	4485.36
21.314	0		21.329	5971.57		21.324	0		21.321	5656.43
21.331	2823.74		21.346	5536.58		21.34	1782.27		21.338	4612.07
21.347	2582.38		21.362	4909.88		21.357	2123.45		21.354	5797.48
21.364	0		21.379	4597.35		21.373	0		21.371	5217.54
21.38	0		21.396	4564.7		21.39	2258.26		21.387	5543.29
21.397	3008.49		21.412	4723.05		21.406	2068.39		21.404	5938.6
21.414	0		21.429	4367.65		21.423	1844.71		21.42	6421.39
21.43	2725.24		21.445	4208.81		21.44	2322.71		21.437	4695.16
21.447	0		21.462	4691.23		21.456	2195.77		21.454	5581.04
21.463	0		21.478	5166.37		21.473	1914.36		21.47	5270.22
21.48	2533.3		21.495	3817.15		21.489	2091.8		21.487	6231.68
21.496	2720.37		21.512	4683.12		21.506	2053.71		21.503	5543.98
21.513	0		21.528	4055.54		21.523	0		21.52	4796.79
21.53	0		21.545	4554.63		21.539	2017.07		21.536	5105.97
21.546	0		21.561	4458.87		21.556	0		21.553	5406.38
21.563	0		21.578	3527.41		21.572	1814.9		21.57	5876.32
21.579	2081.94		21.594	4129.71		21.589	2065.71		21.586	5868.11
21.596	0		21.611	4002.56		21.605	1473.13		21.603	5844.43
21.612	0		21.628	3539		21.622	1747.64		21.619	4960.36
21.629	0		21.644	3825.98		21.639	1533.8		21.636	5159.24
21.646	0		21.661	4087.05		21.655	0		21.652	5177.36
21.662	0		21.677	3680.13		21.672	0		21.669	5971.12
21.679	0		21.694	4194.91		21.688	1228.36		21.686	5637.56
21.695	1789.07		21.71	3876.62		21.705	1092.09		21.702	5550.9
21.712	1763.5		21.727	3801.15		21.721	977.058		21.719	5232.15
21.728	0		21.744	3988.65		21.738	1132.5		21.735	5867.24
21.745	1835.74		21.76	4412.08		21.755	1221.8		21.752	5595.46
21.762	0		21.777	4534.02		21.771	920.563		21.768	5253.57
21.778	0		21.793	3104.51		21.788	1729.61		21.785	4939.93
21.795	0		21.81	3525.82		21.804	1323.49		21.802	5182.94
21.811	1402.34		21.826	3688.47		21.821	1473.88		21.818	5362.01
21.828	0		21.843	3541.53		21.837	1941.66		21.835	5114.64
21.844	0		21.86	3660.53		21.854	2357.21		21.851	5614.92
21.861	0		21.876	3020.68		21.871	1567.88		21.868	5423.64
21.878	0		21.893	3425.07		21.887	0		21.884	6125.68
21.894	0		21.909	2945.67		21.904	0		21.901	5541.28
21.911	1822.18		21.926	3362.31		21.92	2028.74		21.918	4827.9
21.927	1642.82		21.942	3065.32		21.937	2351.93		21.934	5691.6
21.944	0		21.959	3329.34		21.953	2531.27		21.951	5468.46
21.96	0		21.976	3234.76		21.97	2246.7		21.967	5328.75
21.977	0		21.992	2538.6		21.987	1855.7		21.984	5006.15
21.994	0		22.009	2510.07		22.003	2194.6		22	5131.52
22.01	0		22.025	2347.68		22.02	2055.91		22.017	5224.5
22.027	0		22.042	2178.51		22.036	2044.09		22.034	4856.2
22.043	0		22.058	2503.26		22.053	0		22.05	4297.76
22.06	0		22.075	2503.1		22.069	0		22.067	4719.84
22.077	0		22.092	2417.03		22.086	2482.81		22.083	4360.56
22.093	1437.69		22.108	2192.83		22.103	2293.77		22.1	3938.83
22.11	0		22.125	2697.53		22.119	0		22.116	5096.08
22.126	0		22.141	2937.09		22.136	2271.37		22.133	4612.4
22.143	1016.82		22.158	2436.45		22.152	1981.48		22.15	4725.08
22.159	1196.77		22.174	2599.32		22.169	2127.38		22.166	4949.53
22.176	0		22.191	2767.15		22.185	0		22.183	4726.48
22.193	0		22.208	2673.77		22.202	1701.04		22.199	4935.38
22.209	0		22.224	2478.09		22.219	0		22.216	4691.71
22.226	1300.4		22.241	2618.54		22.235	0		22.232	5052.62
22.242	0		22.257	2344.43		22.252	1896.84		22.249	4828.13
22.259	905.837		22.274	2165.13		22.268	1383.15		22.266	5028.05
22.275	866.117		22.29	2570.26		22.285	1764.68		22.282	4809.83
22.292	0		22.307	2125.57		22.301	2062.08		22.299	4912.29
22.309	0		22.324	3112.24		22.318	0		22.315	4928.81
22.325	0		22.34	2345.22		22.335	1911.2		22.332	4013.95
22.342	0		22.357	2098.43		22.351	0		22.349	4944.39
22.358	1050.57		22.373	2525.05		22.368	0		22.365	4440.39
22.375	1375.66		22.39	2643.25		22.384	0		22.382	3925.05
22.391	1075.85		22.406	2868.41		22.401	0		22.398	3951.29
22.408	1078.41		22.423	2389.84		22.417	2065.88		22.415	4302.61
22.425	0		22.44	2776.87		22.434	0		22.431	4567.45
22.441	891.003		22.456	2143.53		22.451	1781.03		22.448	4213.88
22.458	0		22.473	2475.8		22.467	1914.45		22.465	4746.29
22.474	0		22.489	2167.78		22.484	0		22.481	3414.02
22.491	0		22.506	1944.27		22.5	0		22.498	3560.6
22.507	1387.14		22.523	2514.32		22.517	2355.45		22.514	4126.54
22.524	0		22.539	2195.66		22.533	2126.47		22.531	3218.76
22.541	0		22.556	1909.68		22.55	0		22.547	3233.2
22.557	0		22.572	1892.63		22.567	0		22.564	3589.48
22.574	0		22.589	1744.46		22.583	1916.51		22.581	2921.29
22.59	1105.26		22.605	1867.07		22.6	2383.62		22.597	3728.56
22.607	0		22.622	1512.71		22.616	0		22.614	3451.46
22.623	0		22.639	1577.43		22.633	0		22.63	3483.87
22.64	907.666		22.655	1868.97		22.649	2379.78		22.647	3376.83
22.657	0		22.672	1780.96		22.666	0		22.663	3297.25
22.673	0		22.688	1459.06		22.683	0		22.68	2426.88
22.69	0		22.705	1392.2		22.699	2307.94		22.697	3272.73
22.706	0		22.721	1783.04		22.716	2028.44		22.713	2653.89
22.723	818.799		22.738	1563.46		22.732	2006.84		22.73	2925.52
22.739	633.313		22.755	1674.08		22.749	2163.59		22.746	2855.53
22.756	0		22.771	1340.92		22.766	0		22.763	2517.67
22.773	0		22.788	1824.41		22.782	0		22.779	2823.69
22.789	1001.58		22.804	1233.97		22.799	2188.6		22.796	3121.18
22.806	977.632		22.821	1485.16		22.815	0		22.813	3059.21
22.822	881.31		22.837	1402.86		22.832	0		22.829	2947.77
22.839	811.248		22.854	1513.73		22.848	1906.89		22.846	2628.5
22.855	902.27		22.871	1536.32		22.865	0		22.862	3113.29
22.872	0		22.887	1910.37		22.882	0		22.879	2805.36
22.889	0		22.904	1298.74		22.898	1706.19		22.895	2519.82
22.905	692.405		22.92	820.155		22.915	1943.79		22.912	3023.57
22.922	724.787		22.937	1188.36		22.931	1305.72		22.929	3070.79
22.938	0		22.953	834.152		22.948	1222.08		22.945	2380.35
22.955	0		22.97	1165.78		22.964	1432.04		22.962	2181.33
22.971	624.541		22.987	849.145		22.981	0		22.978	2477.05
22.988	0		23.003	1336.25		22.998	0		22.995	2358.19
23.005	849.758		23.02	732.819		23.014	1549.05		23.011	2194.77
23.021	753.668		23.036	915.641		23.031	1460.43		23.028	2085.74
23.038	677.887		23.053	1191.46		23.047	1429.21		23.045	2134.93
23.054	968.129		23.069	838.297		23.064	0		23.061	1977.27
23.071	0		23.086	1028.77		23.08	769.538		23.078	2116.25
23.087	509.487		23.103	967.229		23.097	0		23.094	1882.68
23.104	763.769		23.119	845.583		23.114	490.647		23.111	2105.89
23.121	0		23.136	875.458		23.13	0		23.127	1743.3
23.137	575.932		23.152	1063.27		23.147	653.206		23.144	2207.14
23.154	775.765		23.169	1241.61		23.163	0		23.161	1927.18
23.17	0		23.185	760.186		23.18	0		23.177	2088.71
23.187	0		23.202	453.105		23.196	664.229		23.194	1461.51
23.203	0		23.219	789.945		23.213	0		23.21	1172.55
23.22	0		23.235	851.924		23.23	641.597		23.227	1214.12
23.237	0		23.252	820.321		23.246	0		23.243	1725.99
23.253	0		23.268	807.017		23.263	687.146		23.26	1156.09
23.27	0		23.285	822.467		23.279	731.334		23.277	1244.34
23.286	0		23.301	772.825		23.296	520.332		23.293	1466.97
23.303	0		23.318	1108.29		23.312	0		23.31	1825.61
23.32	0		23.335	988.605		23.329	0		23.326	1670.39
23.336	0		23.351	916.879		23.346	0		23.343	1357.57
23.353	0		23.368	781.056		23.362	0		23.359	1356.44
23.369	0		23.384	777.736		23.379	0		23.376	1416.51
23.386	0		23.401	941.675		23.395	0		23.393	1139.99
23.402	0		23.417	709.305		23.412	0		23.409	1015.9
23.419	0		23.434	890.613		23.428	0		23.426	1191.97
23.436	0		23.451	1144.73		23.445	0		23.442	1420.53
23.452	779.101		23.467	897.581		23.462	0		23.459	1026.4
23.469	0		23.484	978.419		23.478	0		23.475	1123.52
23.485	0		23.5	712.05		23.495	0		23.492	1217.31
23.502	0		23.517	863.07		23.511	363.428		23.509	1074.29
23.518	0		23.533	831.168		23.528	0		23.525	1514.4
23.535	0		23.55	1017.73		23.544	477.82		23.542	1298.55
23.552	991.944		23.567	861.852		23.561	452.971		23.558	1136.72
23.568	0		23.583	771.483		23.578	0		23.575	1199.07
23.585	0		23.6	725.744		23.594	0		23.592	1018.43
23.601	0		23.616	857.607		23.611	0		23.608	998.728
23.618	0		23.633	737.704		23.627	0		23.625	1245.77
23.634	0		23.649	861.786		23.644	0		23.641	1289.11
23.651	681.883		23.666	800.189		23.66	0		23.658	1228.89
23.668	0		23.683	827.102		23.677	0		23.674	1245.71
23.684	0		23.699	839.647		23.694	0		23.691	1201.24
23.701	652.367		23.716	760.393		23.71	0		23.708	1012.98
23.717	730.972		23.732	666.631		23.727	0		23.724	1314.48
23.734	564.203		23.749	772.024		23.743	668.942		23.741	1005.41
23.75	905.387		23.766	743.249		23.76	0		23.757	1426.53
23.767	0		23.782	673.553		23.776	0		23.774	1134.53
23.784	637.67		23.799	776.46		23.793	473.252		23.79	984.518
23.8	0		23.815	815.275		23.81	0		23.807	999.981
23.817	0		23.832	795.253		23.826	620.502		23.824	1107.48
23.833	0		23.848	601.587		23.843	0		23.84	1023.99
23.85	0		23.865	695.121		23.859	0		23.857	1017.2
23.866	0		23.882	537.509		23.876	603.214		23.873	993.014
23.883	0		23.898	597.484		23.892	0		23.89	1018.94
23.9	0		23.915	867.207		23.909	0		23.906	691.623
23.916	0		23.931	488.824		23.926	0		23.923	945.328
23.933	587.022		23.948	887.417		23.942	0		23.94	926.943
23.949	0		23.964	738.803		23.959	0		23.956	906.511
23.966	0		23.981	935.434		23.975	737.42		23.973	949.71
23.982	0		23.998	692.335		23.992	0		23.989	1134.8
23.999	0		24.014	601.429		24.009	0		24.006	833.453
24.016	0		24.031	870.081		24.025	305.789		24.022	1033.17
24.032	589.929		24.047	881.054		24.042	0		24.039	646.471
24.049	0		24.064	730.547		24.058	0		24.056	796.76
24.065	444.589		24.08	690.113		24.075	0		24.072	855.627
24.082	0		24.097	810.436		24.091	392.76		24.089	882.459
24.098	0		24.114	516.779		24.108	353.447		24.105	1170.37
24.115	0		24.13	599.634		24.125	0		24.122	727.19
24.132	0		24.147	641.257		24.141	641.926		24.138	900.894
24.148	0		24.163	702.893		24.158	0		24.155	625.641
24.165	0		24.18	503.53		24.174	349.474		24.172	862.717
24.181	0		24.196	662.267		24.191	0		24.188	744.256
24.198	632.764		24.213	1038.93		24.207	506.712		24.205	726.251
24.214	0		24.23	708.898		24.224	0		24.221	779.027
24.231	0		24.246	620.621		24.241	552.138		24.238	1014.1
24.248	594.938		24.263	754.097		24.257	409.341		24.254	885.373
24.264	0		24.279	710.939		24.274	790.17		24.271	1017.96
24.281	0		24.296	612.693		24.29	566.503		24.288	853.915
24.297	0		24.312	587.966		24.307	0		24.304	575.17
24.314	531.171		24.329	597.153		24.323	0		24.321	926.653
24.33	0		24.346	665.005		24.34	0		24.337	655.068
24.347	0		24.362	386.039		24.357	0		24.354	777.551
24.364	0		24.379	571.785		24.373	574.962		24.37	1027.86
24.38	436.028		24.395	618.304		24.39	528.923		24.387	830.056
24.397	0		24.412	493.518		24.406	0		24.404	839.072
24.413	0		24.428	821.928		24.423	0		24.42	946.764
24.43	374.528		24.445	524.877		24.439	393.036		24.437	748.651
24.446	0		24.462	354.737		24.456	0		24.453	970.939
24.463	495.555		24.478	677.293		24.473	784.912		24.47	725.998
24.48	0		24.495	658.333		24.489	0		24.486	763.141
24.496	596.9		24.511	615.499		24.506	0		24.503	754.362
24.513	0		24.528	594.645		24.522	442.085		24.52	624.071
24.529	664.297		24.544	616.496		24.539	0		24.536	703.112
24.546	0		24.561	520.075		24.555	0		24.553	715.958
24.563	0		24.578	646.317		24.572	0		24.569	685.557
24.579	0		24.594	521.206		24.589	0		24.586	938.077
24.596	0		24.611	464.74		24.605	0		24.602	884.28
24.612	0		24.627	498.338		24.622	0		24.619	809.82
24.629	0		24.644	698.467		24.638	0		24.636	730.269
24.645	0		24.66	691.384		24.655	0		24.652	662.339
24.662	0		24.677	335.842		24.671	0		24.669	540.952
24.679	580.115		24.694	483.221		24.688	0		24.685	892.15
24.695	0		24.71	536.127		24.705	587.71		24.702	794.854
24.712	0		24.727	668.947		24.721	0		24.718	802.18
24.728	0		24.743	542.5		24.738	0		24.735	472.275
24.745	618.319		24.76	479.707		24.754	0		24.752	1068.57
24.761	527.431		24.776	603.05		24.771	0		24.768	749.539
24.778	0		24.793	452.013		24.787	0		24.785	816.565
24.795	411.445		24.81	400.001		24.804	519.592		24.801	615.89
24.811	0		24.826	600.683		24.821	499.053		24.818	617.827
24.828	0		24.843	608.222		24.837	0		24.835	721.411
24.844	332.053		24.859	417.715		24.854	0		24.851	634.553
24.861	0		24.876	449.375		24.87	0		24.868	669.716
24.877	543.784		24.892	617.371		24.887	688.955		24.884	696.497
24.894	457.953		24.909	493.869		24.903	263.91		24.901	659.188
24.911	434.33		24.926	530.101		24.92	0		24.917	652.897
24.927	0		24.942	481.408		24.937	0		24.934	827.146
24.944	457.379		24.959	459.849		24.953	0		24.951	825.432
24.96	0		24.975	527.838		24.97	0		24.967	524.554
24.977	438.437		24.992	374.333		24.986	0		24.984	834.013
24.993	0		25.009	614.912		25.003	0		25	371.785
25.01	0		25.025	476.157		25.019	0		25.017	796.71
25.027	0		25.042	436.718		25.036	429.428		25.033	645.596
25.043	0		25.058	306.044		25.053	0		25.05	589.277
25.06	519.048		25.075	502.038		25.069	431.022		25.067	589.549
25.076	0		25.091	325.96		25.086	471.061		25.083	657.28
25.093	0		25.108	706.099		25.102	458.51		25.1	876.366
25.109	406.682		25.125	369.29		25.119	295.455		25.116	635.458
25.126	436.344		25.141	332.338		25.135	510.567		25.133	775.666
25.143	0		25.158	410.956		25.152	404.85		25.149	536.396
25.159	500.192		25.174	409.293		25.169	491.566		25.166	472.707
25.176	0		25.191	564.167		25.185	0		25.183	765.474
25.192	577.261		25.207	356.624		25.202	321.807		25.199	651.71
25.209	0		25.224	480.531		25.218	0		25.216	452.089
25.225	561.201		25.241	691.209		25.235	0		25.232	859.687
25.242	508.752		25.257	400.65		25.252	0		25.249	656.834
25.259	0		25.274	369.504		25.268	463.485		25.265	608.348
25.275	598.267		25.29	405.888		25.285	0		25.282	560.398
25.292	414.327		25.307	638.258		25.301	0		25.299	467.342
25.308	597.915		25.323	337.079		25.318	426.514		25.315	593.481
25.325	0		25.34	402.269		25.334	0		25.332	521.739
25.341	0		25.357	283.146		25.351	0		25.348	646.406
25.358	0		25.373	412.439		25.368	423.484		25.365	504.646
25.375	0		25.39	413.542		25.384	0		25.381	614.278
25.391	478.494		25.406	444.208		25.401	372.17		25.398	441.303
25.408	0		25.423	437.81		25.417	498.657		25.415	703.523
25.424	0		25.439	379.408		25.434	0		25.431	725.271
25.441	0		25.456	502.651		25.45	412.14		25.448	828.576
25.457	328.783		25.473	434.349		25.467	0		25.464	459.378
25.474	291.721		25.489	637.577		25.484	0		25.481	544.263
25.491	438.48		25.506	475.66		25.5	262.976		25.497	528.993
25.507	0		25.522	494.125		25.517	470.102		25.514	704.274
25.524	607.041		25.539	581.048		25.533	212.066		25.531	418.911
25.54	0		25.555	472.209		25.55	559.021		25.547	468.538
25.557	0		25.572	485.057		25.566	534.83		25.564	515.855
25.573	623.477		25.589	607.18		25.583	595.194		25.58	687.418
25.59	0		25.605	598.139		25.6	452.525		25.597	688.218
25.607	0		25.622	493.611		25.616	459.089		25.613	647.336
25.623	398.058		25.638	544.703		25.633	0		25.63	835.206
25.64	608.883		25.655	579.229		25.649	541.652		25.647	644.793
25.656	0		25.671	779.034		25.666	0		25.663	649.062
25.673	681.464		25.688	672.284		25.682	534.289		25.68	711.541
25.689	754.248		25.705	667.222		25.699	0		25.696	933.35
25.706	0		25.721	641.47		25.716	504.583		25.713	857.643
25.723	0		25.738	1184.75		25.732	677.37		25.729	614.816
25.739	0		25.754	658.093		25.749	339.856		25.746	852.345
25.756	0		25.771	445.685		25.765	335.866		25.763	795.875
25.772	636.909		25.787	695.392		25.782	665.78		25.779	740.638
25.789	549.584		25.804	592.178		25.798	0		25.796	627.04
25.806	486.268		25.821	608.812		25.815	330.832		25.812	590.532
25.822	0		25.837	599.147		25.832	0		25.829	639.539
25.839	563.122		25.854	715.864		25.848	384.652		25.845	949.918
25.855	0		25.87	878.009		25.865	0		25.862	663.115
25.872	0		25.887	477.259		25.881	0		25.879	930.589
25.888	0		25.903	751.099		25.898	445.8		25.895	673.005
25.905	635.335		25.92	842.732		25.914	0		25.912	843.536
25.922	722.182		25.937	721.678		25.931	240.372		25.928	455.477
25.938	0		25.953	457.692		25.948	0		25.945	793.42
25.955	0		25.97	775.066		25.964	283.045		25.961	565.556
25.971	0		25.986	1012.45		25.981	0		25.978	1112.17
25.988	546.922		26.003	685.385		25.997	275.726		25.995	790.872
26.004	0		26.019	755.87		26.014	234.607		26.011	531.584
26.021	568.932		26.036	487.24		26.03	248.208		26.028	552.725
26.038	442.901		26.053	868.363		26.047	0		26.044	617.174
26.054	654.575		26.069	764.018		26.064	0		26.061	839.53
26.071	500.275		26.086	695.479		26.08	0		26.077	1258.81
26.087	0		26.102	772.266		26.097	0		26.094	1060.77
26.104	0		26.119	612.247		26.113	0		26.111	672.837
26.12	0		26.135	480.297		26.13	0		26.127	789.725
26.137	606.294		26.152	755.447		26.146	446.176		26.144	531.459
26.154	0		26.169	830.351		26.163	341.075		26.16	629.023
26.17	0		26.185	639.18		26.18	0		26.177	828.413
26.187	554.366		26.202	557.706		26.196	0		26.194	1129.12
26.203	596.373		26.218	703.614		26.213	0		26.21	547.772
26.22	550.763		26.235	530.675		26.229	0		26.227	494.002
26.236	0		26.252	697.442		26.246	0		26.243	605.903
26.253	0		26.268	748.77		26.262	0		26.26	886.921
26.27	0		26.285	765.162		26.279	0		26.276	671.592
26.286	504.452		26.301	869.463		26.296	0		26.293	961.762
26.303	495.54		26.318	555.527		26.312	0		26.31	1223.73
26.319	484.659		26.334	678.335		26.329	0		26.326	639.836
26.336	0		26.351	653.483		26.345	281.127		26.343	1094.53
26.352	0		26.368	722.563		26.362	296.102		26.359	926.102
26.369	512.574		26.384	537.295		26.378	0		26.376	865.701
26.386	0		26.401	508.177		26.395	0		26.392	965.906
26.402	433.748		26.417	380.657		26.412	422.487		26.409	895.047
26.419	285.452		26.434	751.069		26.428	0		26.426	569.373
26.435	681.786		26.45	581.909		26.445	0		26.442	1060.85
26.452	734.927		26.467	544.92		26.461	0		26.459	1032.66
26.468	0		26.484	631.718		26.478	240.057		26.475	627.396
26.485	585.711		26.5	601.736		26.495	0		26.492	692.594
26.502	478.038		26.517	503.39		26.511	0		26.508	882.2
26.518	0		26.533	576.634		26.528	252.373		26.525	673.413
26.535	472.742		26.55	519.335		26.544	323.057		26.542	545.346
26.551	667.448		26.566	491.532		26.561	0		26.558	757.574
26.568	0		26.583	441.146		26.577	325.3		26.575	538.696
26.584	0		26.6	601.257		26.594	0		26.591	959.061
26.601	0		26.616	574.736		26.611	206.198		26.608	940.945
26.618	383.145		26.633	595.417		26.627	0		26.624	789.748
26.634	0		26.649	610.366		26.644	0		26.641	523.619
26.651	570.336		26.666	591.807		26.66	0		26.658	826.345
26.667	479.376		26.682	476.328		26.677	0		26.674	779.095
26.684	617.318		26.699	560.692		26.693	0		26.691	566.734
26.7	0		26.716	638.638		26.71	403.562		26.707	660.893
26.717	470.378		26.732	625.667		26.727	0		26.724	552.755
26.734	523.387		26.749	575.056		26.743	0		26.74	757.274
26.75	0		26.765	439.012		26.76	0		26.757	789.938
26.767	685.708		26.782	792.959		26.776	390.188		26.774	853.113
26.783	469.25		26.798	312.64		26.793	285.556		26.79	694.275
26.8	0		26.815	469.874		26.809	0		26.807	818.687
26.816	0		26.832	390.608		26.826	410.984		26.823	620.703
26.833	503.58		26.848	622.45		26.843	0		26.84	566.308
26.85	684.484		26.865	602.14		26.859	0		26.856	513.432
26.866	0		26.881	433.402		26.876	340.835		26.873	1196.49
26.883	519.635		26.898	402.34		26.892	237.621		26.89	833.875
26.899	418.37		26.914	622.918		26.909	463.746		26.906	680.498
26.916	0		26.931	315.182		26.925	0		26.923	1056.66
26.932	0		26.948	418.243		26.942	429.143		26.939	521.243
26.949	0		26.964	377.333		26.959	208.865		26.956	1072.46
26.966	0		26.981	462.1		26.975	437.519		26.972	599.38
26.982	0		26.997	767.01		26.992	476.984		26.989	1050.09
26.999	435.893		27.014	800.298		27.008	447.944		27.006	730.842
27.015	439.531		27.03	625.168		27.025	0		27.022	917.829
27.032	0		27.047	449.88		27.041	0		27.039	410.703
27.048	246.647		27.064	562.67		27.058	0		27.055	1061.77
27.065	0		27.08	349.085		27.075	383.493		27.072	1044.8
27.082	0		27.097	561.258		27.091	0		27.088	560.056
27.098	588.637		27.113	550.209		27.108	0		27.105	830.349
27.115	0		27.13	498.5		27.124	0		27.122	476.25
27.131	432.884		27.146	563.752		27.141	0		27.138	425.761
27.148	520.842		27.163	544.666		27.157	0		27.155	637.862
27.165	358.355		27.18	479.085		27.174	619.579		27.171	853.865
27.181	434.751		27.196	439.729		27.191	0		27.188	527.533
27.198	0		27.213	626.323		27.207	513.467		27.204	976.307
27.214	0		27.229	441.796		27.224	585.793		27.221	704.047
27.231	455.687		27.246	388.963		27.24	0		27.238	607.371
27.247	0		27.262	590.443		27.257	0		27.254	257.175
27.264	365.893		27.279	324.092		27.273	420.771		27.271	593.499
27.281	0		27.296	492.439		27.29	466.198		27.287	949.424
27.297	653.389		27.312	618.599		27.307	343.395		27.304	688.745
27.314	0		27.329	555.961		27.323	0		27.32	416.663
27.33	425.537		27.345	465.164		27.34	574.469		27.337	832.044
27.347	0		27.362	449.757		27.356	0		27.354	802.291
27.363	0		27.378	369.981		27.373	401.594		27.37	454.911
27.38	440.862		27.395	493.189		27.389	658.411		27.387	887.582
27.397	394.627		27.412	504.915		27.406	0		27.403	514.421
27.413	449.261		27.428	497.388		27.423	0		27.42	577.844
27.43	0		27.445	489.676		27.439	431.66		27.437	700.6
27.446	411.056		27.461	439.97		27.456	0		27.453	751.203
27.463	0		27.478	530.479		27.472	0		27.47	575.847
27.479	0		27.495	307.89		27.489	0		27.486	830.795
27.496	427.478		27.511	390.52		27.505	459.533		27.503	563.837
27.513	0		27.528	311.051		27.522	564.478		27.519	640.857
27.529	481.589		27.544	413.765		27.539	459.862		27.536	530.955
27.546	0		27.561	305.894		27.555	0		27.553	780.834
27.562	0		27.577	418.049		27.572	0		27.569	390.872
27.579	0		27.594	479.974		27.588	0		27.586	422.038
27.595	405.034		27.611	440.098		27.605	277.361		27.602	554.115
27.612	0		27.627	662.502		27.621	0		27.619	755.828
27.629	0		27.644	408.13		27.638	473.347		27.635	603.827
27.645	0		27.66	391.041		27.655	0		27.652	510.815
27.662	419.397		27.677	373.711		27.671	0		27.669	719.405
27.678	544.166		27.693	549.018		27.688	0		27.685	531.29
27.695	410.277		27.71	397.199		27.704	0		27.702	543.049
27.711	0		27.727	291.871		27.721	0		27.718	782.016
27.728	551.053		27.743	406.878		27.738	302.108		27.735	489.068
27.745	350.122		27.76	380.229		27.754	0		27.751	775.367
27.761	0		27.776	449.442		27.771	0		27.768	496.878
27.778	461.333		27.793	424.364		27.787	361.632		27.785	520.965
27.794	367.452		27.809	590.091		27.804	319.674		27.801	510.911
27.811	0		27.826	353.537		27.82	0		27.818	726.858
27.827	362.606		27.843	261.808		27.837	252.954		27.834	841.932
27.844	269.83		27.859	305.029		27.854	0		27.851	343.162
27.861	363.404		27.876	691.984		27.87	0		27.867	306.696
27.877	0		27.892	440.477		27.887	0		27.884	616.609
27.894	377.014		27.909	359.443		27.903	0		27.901	452.579
27.91	505.496		27.925	515.967		27.92	0		27.917	555.39
27.927	0		27.942	655.722		27.936	0		27.934	570.74
27.943	0		27.959	436.23		27.953	222.391		27.95	443.871
27.96	0		27.975	556.369		27.97	0		27.967	361.953
27.977	0		27.992	277.167		27.986	0		27.983	392.193
27.993	0		28.008	407.997		28.003	0		28	260.858
28.01	365.08		28.025	361.434		28.019	0		28.017	210.636
28.026	0		28.041	509.033		28.036	0		28.033	0
28.043	453.194		28.058	390.303		28.052	0		28.05	225.889
28.059	0		28.075	239.79		28.069	0		28.066	0
28.076	0		28.091	234.551		28.086	0		28.083	0
28.093	0		28.108	395.177		28.102	0		28.099	331.667
28.109	0		28.124	312.759		28.119	0		28.116	284.832
28.126	0		28.141	352.219		28.135	0		28.133	342.553
28.142	0		28.157	212.193		28.152	0		28.149	438.63
28.159	0		28.174	366.658		28.168	336.808		28.166	402.221
28.175	0		28.191	0		28.185	0		28.182	318.467
28.192	0		28.207	345.194		28.202	0		28.199	275.877
28.209	223.831		28.224	333.082		28.218	0		28.215	362.436
28.225	0		28.24	332.901		28.235	0		28.232	429.314
28.242	0		28.257	0		28.251	0		28.249	0
28.258	0		28.273	262.209		28.268	0		28.265	264.706
28.275	0		28.29	262.604		28.284	216.208		28.282	0
28.291	0		28.307	205.071		28.301	0		28.298	317.812
28.308	0		28.323	347.176		28.318	0		28.315	286.26
28.325	232.452		28.34	390.16		28.334	0		28.331	222.404
28.341	0		28.356	311.157		28.351	0		28.348	289.284
28.358	279.774		28.373	508.567		28.367	0		28.365	396.647
28.374	0		28.389	368.606		28.384	0		28.381	0
28.391	0		28.406	0		28.4	0		28.398	379.69
28.408	0		28.423	0		28.417	0		28.414	262.594
28.424	0		28.439	211.008		28.434	223.457		28.431	211.467
28.441	0		28.456	0		28.45	0		28.447	363.771
28.457	0		28.472	336.627		28.467	0		28.464	281.273
28.474	0		28.489	346.497		28.483	0		28.481	371.247
28.49	0		28.505	241.527		28.5	225.262		28.497	0
28.507	0		28.522	236.506		28.516	0		28.514	379.177
28.524	0		28.539	0		28.533	0		28.53	497.864
28.54	0		28.555	277.703		28.55	0		28.547	357.724
28.557	0		28.572	280.214		28.566	0		28.563	422.896
28.573	0		28.588	276.711		28.583	0		28.58	555.189
28.59	0		28.605	239.596		28.599	0		28.597	606.366
28.606	0		28.621	401.835		28.616	0		28.613	226.906
28.623	0		28.638	0		28.632	200.656		28.63	343.593
28.64	0		28.655	406.535		28.649	226.358		28.646	396.129
28.656	0		28.671	257.226		28.666	0		28.663	714.868
28.673	0		28.688	0		28.682	0		28.68	261.329
28.689	252.178		28.704	0		28.699	0		28.696	679.013
28.706	0		28.721	353.325		28.715	271.39		28.713	475.882
28.722	0		28.738	256.827		28.732	0		28.729	470.043
28.739	222.654		28.754	532.376		28.748	0		28.746	372.413
28.756	0		28.771	212.857		28.765	0		28.762	636.682
28.772	280.28		28.787	0		28.782	499.639		28.779	534.798
28.789	0		28.804	250.096		28.798	0		28.796	953.501
28.805	487.886		28.82	236.198		28.815	0		28.812	704.322
28.822	0		28.837	384.899		28.831	401.68		28.829	416.231
28.838	0		28.854	239.951		28.848	0		28.845	338.156
28.855	0		28.87	234.155		28.864	263.233		28.862	463.625
28.872	0		28.887	259.853		28.881	0		28.878	878.639
28.888	0		28.903	295.039		28.898	0		28.895	547.548
28.905	0		28.92	385.31		28.914	0		28.912	624.838
28.921	0		28.936	393.834		28.931	0		28.928	536.026
28.938	295.505		28.953	381.475		28.947	0		28.945	452.964
28.954	387.167		28.97	594.736		28.964	302.922		28.961	707.09
28.971	248.543		28.986	226.177		28.981	0		28.978	720.867
28.988	440.351		29.003	366.353		28.997	0		28.994	499.354
29.004	287.94		29.019	416.604		29.014	0		29.011	304.956
29.021	0		29.036	290.936		29.03	379.233		29.028	357.24
29.037	339.907		29.052	239.262		29.047	0		29.044	562.857
29.054	403.406		29.069	412.168		29.063	491.23		29.061	366.676
29.07	0		29.086	314.865		29.08	465.825		29.077	554.588
29.087	496.665		29.102	237.912		29.097	341.331		29.094	645.932
29.104	0		29.119	389.326		29.113	0		29.11	714.747
29.12	470.313		29.135	240.937		29.13	0		29.127	524.751
29.137	0		29.152	420.193		29.146	0		29.144	432.872
29.153	393.402		29.168	375.99		29.163	366.637		29.16	688.647
29.17	0		29.185	557.438		29.179	0		29.177	428.613
29.186	509.601		29.202	321.712		29.196	537.855		29.193	462.436
29.203	0		29.218	0		29.213	315.22		29.21	592.703
29.22	489.801		29.235	283.676		29.229	380.528		29.226	686.435
29.236	357.557		29.251	353.063		29.246	0		29.243	490.347
29.253	0		29.268	283.07		29.262	0		29.26	699.915
29.269	0		29.284	421.29		29.279	299.85		29.276	591.847
29.286	445.05		29.301	337.083		29.295	0		29.293	520.758
29.302	473.827		29.318	465.969		29.312	0		29.309	481.932
29.319	206.59		29.334	484.388		29.329	486.613		29.326	562.05
29.336	0		29.351	430.979		29.345	372.474		29.342	704.292
29.352	0		29.367	399.25		29.362	0		29.359	395.526
29.369	408.141		29.384	410.288		29.378	0		29.376	615.528
29.385	360.296		29.4	367.816		29.395	403.577		29.392	769.146
29.402	411.832		29.417	348.237		29.411	0		29.409	600.663
29.418	367.757		29.434	357.26		29.428	0		29.425	380.951
29.435	475.008		29.45	361.593		29.445	336.103		29.442	667.704
29.452	378.492		29.467	465.152		29.461	0		29.458	461.898
29.468	427.441		29.483	339.105		29.478	350.489		29.475	601.645
29.485	513.308		29.5	273.776		29.494	0		29.492	405.955
29.501	0		29.516	609.346		29.511	0		29.508	559.487
29.518	369.917		29.533	322.119		29.527	368.553		29.525	667.397
29.534	384.842		29.55	247.778		29.544	0		29.541	522.892
29.551	0		29.566	443.917		29.561	261.143		29.558	468.948
29.568	0		29.583	215.222		29.577	405.281		29.574	535.064
29.584	400.933		29.599	287.819		29.594	0		29.591	433.672
29.601	0		29.616	440.36		29.61	0		29.608	463.41
29.617	0		29.632	480.148		29.627	0		29.624	468.677
29.634	520.981		29.649	464.941		29.643	318.289		29.641	989.605
29.651	0		29.666	483.893		29.66	385.116		29.657	462.755
29.667	440.051		29.682	350.711		29.677	295.602		29.674	397.362
29.684	429.863		29.699	308.801		29.693	0		29.69	536.634
29.7	0		29.715	419.21		29.71	343.195		29.707	711.073
29.717	424.426		29.732	320.315		29.726	0		29.724	568.582
29.733	486.893		29.748	456.851		29.743	277.114		29.74	485.207
29.75	0		29.765	301.048		29.759	0		29.757	468.59
29.767	513.646		29.782	0		29.776	0		29.773	488.999
29.783	404.389		29.798	292.605		29.793	258.541		29.79	663.716
29.8	311.661		29.815	376.982		29.809	0		29.806	401.975
29.816	524.919		29.831	313.052		29.826	360.589		29.823	501.975
29.833	386.212		29.848	322.832		29.842	442.224		29.84	448.989
29.849	284.875		29.864	271.608		29.859	258.086		29.856	573.767
29.866	440.582		29.881	231.966		29.875	430.275		29.873	518.157
29.883	385.131		29.898	268.306		29.892	501.506		29.889	350.722
29.899	315.128		29.914	505.652		29.909	360.258		29.906	506.375
29.916	461.386		29.931	615.356		29.925	387.494		29.923	647.345
29.932	203.617		29.947	301.101		29.942	432.768		29.939	498.645
29.949	0		29.964	398.128		29.958	434.714		29.956	569.71
29.965	283.043		29.981	390.76		29.975	489.104		29.972	812.771
29.982	0		29.997	427.763		29.991	380.416		29.989	425.803
29.999	532.92		30.014	376.214		30.008	0		30.005	571.801
30.015	0		30.03	423.08		30.025	469.351		30.022	415.044
30.032	259.122		30.047	430.964		30.041	405.175		30.039	325.918
30.048	0		30.063	305.138		30.058	0		30.055	492.559
30.065	338.783		30.08	350.358		30.074	0		30.072	615.651
30.081	235.178		30.097	0		30.091	0		30.088	290.904
30.098	377.361		30.113	422.112		30.107	358.271		30.105	628.932
30.115	0		30.13	479.542		30.124	0		30.121	464.874
30.131	309.231		30.146	412.615		30.141	0		30.138	452.657
30.148	480.186		30.163	385.365		30.157	0		30.155	431.549
30.164	361.876		30.179	286.809		30.174	0		30.171	524.421
30.181	0		30.196	268.044		30.19	299.492		30.188	543.551
30.197	0		30.213	571.457		30.207	391.077		30.204	491.888
30.214	372.65		30.229	329.004		30.223	437.165		30.221	331.626
30.231	248.32		30.246	481.985		30.24	348.06		30.237	217.498
30.247	414.652		30.262	383.539		30.257	272.126		30.254	479.364
30.264	0		30.279	224.877		30.273	387.858		30.271	456.481
30.28	0		30.295	556.21		30.29	505.763		30.287	443.298
30.297	319.593		30.312	362.973		30.306	506.696		30.304	230.115
30.313	0		30.329	406.615		30.323	0		30.32	356.836
30.33	0		30.345	346.422		30.34	243.062		30.337	505.8
30.347	450.1		30.362	368.214		30.356	438.433		30.353	338.608
30.363	264.311		30.378	285.21		30.373	527.627		30.37	410.534
30.38	318.971		30.395	529.135		30.389	0		30.387	479.153
30.396	0		30.411	382.673		30.406	0		30.403	456.02
30.413	0		30.428	419.033		30.422	0		30.42	489.566
30.429	408.443		30.445	0		30.439	0		30.436	900.38
30.446	388.308		30.461	245.496		30.456	0		30.453	522.724
30.463	0		30.478	473.378		30.472	417.593		30.469	320.848
30.479	383.749		30.494	318.647		30.489	530.883		30.486	362.843
30.496	315.952		30.511	418.872		30.505	530.5		30.503	437.308
30.512	0		30.527	275.355		30.522	307.381		30.519	346.978
30.529	325.485		30.544	359.024		30.538	417.442		30.536	667.669
30.545	232.654		30.561	409.69		30.555	409.408		30.552	438.175
30.562	226.27		30.577	243.831		30.572	0		30.569	403.313
30.579	0		30.594	351.083		30.588	509.017		30.585	417.814
30.595	249.619		30.61	476.296		30.605	392.301		30.602	464.696
30.612	0		30.627	259.23		30.621	416.706		30.619	311.236
30.628	0		30.643	342.438		30.638	299.065		30.635	353.25
30.645	0		30.66	368.916		30.654	396.034		30.652	413.582
30.661	0		30.677	324.489		30.671	421.559		30.668	727.14
30.678	250.077		30.693	325.468		30.688	0		30.685	506.818
30.695	0		30.71	402.027		30.704	307.981		30.701	500.85
30.711	489.868		30.726	364.375		30.721	0		30.718	359.284
30.728	402.278		30.743	290.118		30.737	369.565		30.735	625.519
30.744	0		30.759	435.454		30.754	0		30.751	812.467
30.761	373.237		30.776	302.063		30.77	445.27		30.768	283.682
30.777	429.785		30.793	445.365		30.787	414.51		30.784	330.266
30.794	0		30.809	253.116		30.804	0		30.801	428.575
30.811	0		30.826	382.814		30.82	345.208		30.817	245.833
30.827	404.065		30.842	328.206		30.837	337.379		30.834	561.755
30.844	465.379		30.859	407.827		30.853	510.255		30.851	383.781
30.86	412.921		30.875	255.184		30.87	385.594		30.867	433.024
30.877	571.317		30.892	272.23		30.886	367.398		30.884	226.887
30.894	338.361		30.909	302.143		30.903	0		30.9	418.489
30.91	203.937		30.925	250.134		30.92	334.447		30.917	424.085
30.927	0		30.942	468.231		30.936	0		30.933	234.691
30.943	354.44		30.958	325.202		30.953	0		30.95	386.11
30.96	299.145		30.975	435.304		30.969	484.897		30.967	526.991
30.976	0		30.991	400.696		30.986	345.456		30.983	403.794
30.993	0		31.008	409.373		31.002	293.287		31	464.989
31.01	0		31.025	312.362		31.019	0		31.016	710.393
31.026	334.506		31.041	383.528		31.036	0		31.033	553.472
31.043	0		31.058	335.056		31.052	0		31.049	996.361
31.059	0		31.074	409.552		31.069	0		31.066	582.887
31.076	346.425		31.091	445.101		31.085	251.625		31.083	421.477
31.092	0		31.107	356.184		31.102	0		31.099	295.736
31.109	0		31.124	0		31.118	0		31.116	311.027
31.126	0		31.141	315.235		31.135	0		31.132	421.03
31.142	341.725		31.157	466.565		31.152	0		31.149	475.533
31.159	382.14		31.174	367.232		31.168	567.845		31.166	355.504
31.175	0		31.19	263.693		31.185	415.308		31.182	461.185
31.192	374.291		31.207	311.213		31.201	260.439		31.199	263.044
31.208	0		31.224	241		31.218	0		31.215	778.922
31.225	0		31.24	314.036		31.234	272.619		31.232	706.067
31.242	491.672		31.257	0		31.251	0		31.248	327.35
31.258	0		31.273	372.434		31.268	302.424		31.265	530.015
31.275	0		31.29	400.053		31.284	0		31.282	352.885
31.291	358.834		31.306	228.735		31.301	435.228		31.298	394.475
31.308	219.583		31.323	209.68		31.317	475.836		31.315	460.925
31.324	326.457		31.34	351.615		31.334	481.41		31.331	555.105
31.341	262.598		31.356	489.336		31.35	455.777		31.348	445.091
31.358	290.202		31.373	375.159		31.367	0		31.364	430.038
31.374	0		31.389	223.81		31.384	0		31.381	346.052
31.391	0		31.406	268.265		31.4	304.565		31.398	392.337
31.407	299.535		31.422	348.66		31.417	0		31.414	397.437
31.424	314.821		31.439	505.995		31.433	338.226		31.431	244.273
31.44	0		31.456	382.795		31.45	0		31.447	240.157
31.457	0		31.472	428.948		31.466	0		31.464	660.656
31.474	0		31.489	329.352		31.483	0		31.48	439.532
31.49	0		31.505	337.142		31.5	337.193		31.497	218.552
31.507	0		31.522	322.936		31.516	0		31.514	386.8
31.523	0		31.538	426.147		31.533	501.663		31.53	360.563
31.54	0		31.555	393.292		31.549	559.001		31.547	607.625
31.556	244.259		31.572	355.513		31.566	0		31.563	342.551
31.573	308.599		31.588	473.834		31.583	0		31.58	489.629
31.59	0		31.605	316.341		31.599	0		31.596	507.831
31.606	366.419		31.621	334.846		31.616	0		31.613	396.822
31.623	0		31.638	304.162		31.632	0		31.63	239.362
31.639	399.301		31.654	384.93		31.649	0		31.646	417.294
31.656	349.664		31.671	321.521		31.665	0		31.663	331.129
31.672	0		31.688	399.914		31.682	489.354		31.679	363.551
31.689	0		31.704	279.28		31.699	600.61		31.696	267.409
31.706	411.176		31.721	359.109		31.715	0		31.712	466.875
31.722	354.754		31.737	203.042		31.732	372.86		31.729	412.052
31.739	0		31.754	311.322		31.748	379.364		31.746	372.43
31.755	0		31.77	268.081		31.765	0		31.762	381.234
31.772	305.646		31.787	424.373		31.781	201.065		31.779	339.592
31.788	0		31.804	331.721		31.798	0		31.795	652.077
31.805	262.458		31.82	303.257		31.815	0		31.812	326.446
31.822	315.138		31.837	380.033		31.831	0		31.828	521.412
31.838	408.035		31.853	211.867		31.848	414.971		31.845	654.243
31.855	340.747		31.87	353.674		31.864	0		31.862	572.056
31.871	0		31.886	389.656		31.881	0		31.878	277.456
31.888	471.308		31.903	0		31.897	517.715		31.895	580.167
31.904	0		31.92	388.748		31.914	482.887		31.911	413.885
31.921	0		31.936	211.411		31.931	324.243		31.928	553.713
31.938	296.141		31.953	447.283		31.947	314.158		31.944	272.258
31.954	0		31.969	328.536		31.964	268.272		31.961	619.644
31.971	328.357		31.986	415.913		31.98	411.594		31.978	239.062
31.987	0		32.002	0		31.997	0		31.994	393.105
32.004	279.487		32.019	309.641		32.013	245.084		32.011	545.759
32.02	221.402		32.036	477.256		32.03	382.262		32.027	283.001
32.037	310.471		32.052	286.651		32.047	314.692		32.044	392.059
32.054	0		32.069	379.27		32.063	0		32.06	375.643
32.07	0		32.085	451.103		32.08	0		32.077	346.894
32.087	438.416		32.102	425.469		32.096	273.42		32.094	235.822
32.103	0		32.118	262.301		32.113	0		32.11	497.028
32.12	0		32.135	319.306		32.129	323.228		32.127	393.862
32.137	307.613		32.152	441.085		32.146	0		32.143	402.556
32.153	379.482		32.168	470.304		32.163	0		32.16	297.817
32.17	0		32.185	255.82		32.179	374.584		32.176	371.773
32.186	0		32.201	224.613		32.196	388.453		32.193	454.894
32.203	0		32.218	321.993		32.212	0		32.21	312.013
32.219	0		32.234	312.965		32.229	0		32.226	439.715
32.236	325.249		32.251	505.279		32.245	0		32.243	407.924
32.253	310.515		32.268	356.578		32.262	0		32.259	268.301
32.269	0		32.284	251.226		32.279	0		32.276	399.134
32.286	569.801		32.301	439.959		32.295	0		32.292	273.686
32.302	467.686		32.317	250.343		32.312	0		32.309	337
32.319	0		32.334	376.42		32.328	0		32.326	478.961
32.335	409.008		32.35	399.348		32.345	228.366		32.342	625.93
32.352	334.131		32.367	290.147		32.361	0		32.359	344.153
32.369	0		32.384	222.531		32.378	0		32.375	641.362
32.385	0		32.4	311.322		32.395	329.959		32.392	357.075
32.402	0		32.417	317.145		32.411	0		32.409	301.088
32.418	0		32.433	326.471		32.428	299.618		32.425	731.002
32.435	0		32.45	259.275		32.444	318.503		32.442	384.476
32.451	264.694		32.467	431.517		32.461	0		32.458	678.932
32.468	400.81		32.483	0		32.477	0		32.475	241.14
32.485	0		32.5	348.232		32.494	347.349		32.491	288.464
32.501	0		32.516	404.496		32.511	710.513		32.508	692.509
32.518	218.098		32.533	385.78		32.527	318.097		32.525	499.309
32.534	371.383		32.549	0		32.544	401.719		32.541	368.407
32.551	0		32.566	217.422		32.56	283.398		32.558	534.918
32.567	501.286		32.583	391.407		32.577	0		32.574	274.827
32.584	0		32.599	219.46		32.593	0		32.591	390.142
32.601	0		32.616	0		32.61	0		32.607	476.16
32.617	385.584		32.632	0		32.627	238.119		32.624	493.418
32.634	276.997		32.649	239.028		32.643	464.47		32.641	364.618
32.65	0		32.665	347.905		32.66	0		32.657	0
32.667	0		32.682	311.139		32.676	535.845		32.674	393.206
32.683	507.774		32.699	392.193		32.693	0		32.69	343.615
32.7	221.526		32.715	382.007		32.71	271.356		32.707	597.06
32.717	271.704		32.732	345.651		32.726	0		32.723	244.82
32.733	560.767		32.748	0		32.743	0		32.74	467.41
32.75	388.891		32.765	325.819		32.759	413.432		32.757	210.084
32.766	260.73		32.781	353.482		32.776	484.872		32.773	294.679
32.783	275.331		32.798	247.601		32.792	359.649		32.79	518.434
32.799	0		32.815	220.116		32.809	305.12		32.806	0
32.816	0		32.831	246.71		32.826	390.383		32.823	584.071
32.833	280.671		32.848	420.785		32.842	0		32.839	255.418
32.849	0		32.864	251.873		32.859	0		32.856	266.654
32.866	312.536		32.881	410.794		32.875	336.141		32.873	436.963
32.882	0		32.897	447.536		32.892	338.206		32.889	322.285
32.899	0		32.914	283.351		32.908	0		32.906	518.948
32.915	363.082		32.931	510.565		32.925	0		32.922	283.954
32.932	0		32.947	331.449		32.942	0		32.939	367.155
32.949	348.638		32.964	309.822		32.958	0		32.955	645.615
32.965	0		32.98	204.561		32.975	0		32.972	795.873
32.982	0		32.997	272.352		32.991	0		32.989	631.086
32.998	254.698		33.013	328.17		33.008	257.262		33.005	490.436
33.015	0		33.03	0		33.024	299.77		33.022	0
33.031	241.781		33.047	0		33.041	360.602		33.038	447.022
33.048	0		33.063	420.327		33.058	0		33.055	285.128
33.065	314.503		33.08	481.555		33.074	0		33.071	411.337
33.081	515.476		33.096	206.502		33.091	432.856		33.088	0
33.098	0		33.113	308.567		33.107	0		33.105	273.475
[truncated: 1,629 more rows]

## Sheet: Figure 6C
Lactate, LC-MS peak area
		Sample	Area (ion counts x min)		Anoxia	Nomoxia	t-test, p-value
		Anoxia, 5 hpf	2149690		2149690	178978	6.76257e-06	two-tailed
		Anoxia, 5 hpf	2300165		2300165	85600	3.38128e-06	one-tailed
		Anoxia, 5 hpf	2258420		2258420	259201
		Nomoxia 5 hpf	178978
		Nomoxia 5 hpf	85600
		Nomoxia 5 hpf	259201
