# Supplementary material for: N-myc downstream regulated gene 1 (ndrg1) functions as a molecular switch for cellular adaptation to hypoxia
Source: eLife journal article supplement (doi:10.7554/elife.74031), 2022-09-16
Supplement: fig6-data2 [file Figure 6-Source Data 2.xlsx]

## Sheet: Source Data
	Hours in Anoxia (0%)	WT																																								ndrg1a -/-
24 hpf 0h		7.05288	6.99397	7.16411	5.49055	5.56025	5.61756	17.7766	17.6817	17.6548		4.66326	4.79055	4.79988	4.07204	4.08976	4.04266			1.00582	1.03492	1.08354		4.96978	5.03892	5.83957		2.8764	2.94113	2.90354	2.4347	2.62501	2.41171		4.58657	4.58891	4.58385					3.80751	3.72903	3.71565		2.83014	2.89206	2.89015	6.12547
27 hpf 0h		6.29553	6.13518	6.27586	6.06388	5.87157	5.80328																					1.97045	1.95967	1.93999	1.04614	1.07201	0.565796		0.186161	0.220611	0.240776									12.3735	12.2847	12.255	12.6589
1h		108.087	98.1025	98.1025																																						108.087	108.087	108.087
3h		148.027	148.027	148.027								64.6567	64.6567	64.6567	69.3194	69.3194	69.3194																									158.011	158.011	158.011		69.3194	69.3194	64.6567	69.3194
6h		197.514	197.514	197.514								69.3194	69.3194	69.3194	73.9821	73.9821	73.9821																									148.027	148.027	148.027		79.2665	74.2708	74.2708	73.9821
12h		138.042	138.042	138.042								64.6567	64.6567	64.6567	64.6567	64.6567	69.3194																									138.042	138.042	138.042		64.6567	64.6567	64.6567	64.6567
[truncated: 23 more columns]

## Sheet: ANOVA results
Table Analyzed	lactate revision wt 1a; 0 1 3 6 12h anoxia
Two-way ANOVA	Ordinary
Alpha	0.05
Source of Variation	% of total variation	P value	P value summary	Significant?
Interaction	0.3136	0.88	ns	No
Row Factor	75.43	<0.0001	****	Yes
Column Factor	0.0003775	0.9633	ns	No
ANOVA table	SS (Type III)	DF	MS	F (DFn, DFd)	P value
Interaction	1265	5	252.9	F (5, 135) = 0.3524	P=0.8800
Row Factor	304159	5	60832	F (5, 135) = 84.76	P<0.0001
Column Factor	1.522	1	1.522	F (1, 135) = 0.002121	P=0.9633
Residual	96884	135	717.7
Difference between column means
Predicted (LS) mean of WT	67.88
Predicted (LS) mean of ndrg1a -/-	67.62
Difference between predicted means	0.256
SE of difference	5.559
95% CI of difference	-10.74 to 11.25
Data summary
Number of columns (Column Factor)	2
Number of rows (Row Factor)	6
Number of values	147

## Sheet: Multiple comparisons
Compare cell means regardless of rows and columns
Number of families	1
Number of comparisons per family	66
Alpha	0.05
Tukey's multiple comparisons test	Predicted (LS) mean diff.	95.00% CI of diff.	Below threshold?	Summary	Adjusted P Value
24 hpf 0h:WT vs. 24 hpf 0h:ndrg1a -/-	-0.7569	-23.76 to 22.25	No	ns	>0.9999
24 hpf 0h:WT vs. 27 hpf 0h:WT	2.503	-25.68 to 30.68	No	ns	>0.9999
24 hpf 0h:WT vs. 27 hpf 0h:ndrg1a -/-	-1.064	-31.50 to 29.37	No	ns	>0.9999
24 hpf 0h:WT vs. 1h:WT	-95.88	-149.8 to -41.93	Yes	****	<0.0001
24 hpf 0h:WT vs. 1h:ndrg1a -/-	-102.5	-156.5 to -48.58	Yes	****	<0.0001
24 hpf 0h:WT vs. 3h:WT	-88.46	-122.3 to -54.59	Yes	****	<0.0001
24 hpf 0h:WT vs. 3h:ndrg1a -/-	-91.78	-125.6 to -57.92	Yes	****	<0.0001
24 hpf 0h:WT vs. 6h:WT	-108.1	-141.9 to -74.19	Yes	****	<0.0001
24 hpf 0h:WT vs. 6h:ndrg1a -/-	-92.73	-126.6 to -58.87	Yes	****	<0.0001
24 hpf 0h:WT vs. 12h:WT	-84.09	-118.0 to -50.22	Yes	****	<0.0001
24 hpf 0h:WT vs. 12h:ndrg1a -/-	-83.57	-117.4 to -49.71	Yes	****	<0.0001
24 hpf 0h:ndrg1a -/- vs. 27 hpf 0h:WT	3.26	-24.92 to 31.44	No	ns	>0.9999
24 hpf 0h:ndrg1a -/- vs. 27 hpf 0h:ndrg1a -/-	-0.3072	-30.74 to 30.13	No	ns	>0.9999
24 hpf 0h:ndrg1a -/- vs. 1h:WT	-95.13	-149.1 to -41.17	Yes	****	<0.0001
24 hpf 0h:ndrg1a -/- vs. 1h:ndrg1a -/-	-101.8	-155.7 to -47.83	Yes	****	<0.0001
24 hpf 0h:ndrg1a -/- vs. 3h:WT	-87.7	-121.6 to -53.83	Yes	****	<0.0001
24 hpf 0h:ndrg1a -/- vs. 3h:ndrg1a -/-	-91.03	-124.9 to -57.16	Yes	****	<0.0001
24 hpf 0h:ndrg1a -/- vs. 6h:WT	-107.3	-141.2 to -73.44	Yes	****	<0.0001
24 hpf 0h:ndrg1a -/- vs. 6h:ndrg1a -/-	-91.98	-125.8 to -58.11	Yes	****	<0.0001
24 hpf 0h:ndrg1a -/- vs. 12h:WT	-83.33	-117.2 to -49.47	Yes	****	<0.0001
24 hpf 0h:ndrg1a -/- vs. 12h:ndrg1a -/-	-82.82	-116.7 to -48.95	Yes	****	<0.0001
27 hpf 0h:WT vs. 27 hpf 0h:ndrg1a -/-	-3.567	-38.08 to 30.94	No	ns	>0.9999
27 hpf 0h:WT vs. 1h:WT	-98.39	-154.7 to -42.03	Yes	****	<0.0001
27 hpf 0h:WT vs. 1h:ndrg1a -/-	-105	-161.4 to -48.69	Yes	****	<0.0001
27 hpf 0h:WT vs. 3h:WT	-90.96	-128.5 to -53.39	Yes	****	<0.0001
27 hpf 0h:WT vs. 3h:ndrg1a -/-	-94.29	-131.9 to -56.72	Yes	****	<0.0001
27 hpf 0h:WT vs. 6h:WT	-110.6	-148.1 to -72.99	Yes	****	<0.0001
27 hpf 0h:WT vs. 6h:ndrg1a -/-	-95.24	-132.8 to -57.66	Yes	****	<0.0001
27 hpf 0h:WT vs. 12h:WT	-86.59	-124.2 to -49.02	Yes	****	<0.0001
27 hpf 0h:WT vs. 12h:ndrg1a -/-	-86.08	-123.6 to -48.50	Yes	****	<0.0001
27 hpf 0h:ndrg1a -/- vs. 1h:WT	-94.82	-152.3 to -37.30	Yes	****	<0.0001
27 hpf 0h:ndrg1a -/- vs. 1h:ndrg1a -/-	-101.5	-159.0 to -43.96	Yes	****	<0.0001
27 hpf 0h:ndrg1a -/- vs. 3h:WT	-87.39	-126.7 to -48.10	Yes	****	<0.0001
27 hpf 0h:ndrg1a -/- vs. 3h:ndrg1a -/-	-90.72	-130.0 to -51.43	Yes	****	<0.0001
27 hpf 0h:ndrg1a -/- vs. 6h:WT	-107	-146.3 to -67.70	Yes	****	<0.0001
27 hpf 0h:ndrg1a -/- vs. 6h:ndrg1a -/-	-91.67	-131.0 to -52.38	Yes	****	<0.0001
27 hpf 0h:ndrg1a -/- vs. 12h:WT	-83.03	-122.3 to -43.73	Yes	****	<0.0001
27 hpf 0h:ndrg1a -/- vs. 12h:ndrg1a -/-	-82.51	-121.8 to -43.22	Yes	****	<0.0001
1h:WT vs. 1h:ndrg1a -/-	-6.657	-79.41 to 66.10	No	ns	>0.9999
1h:WT vs. 3h:WT	7.43	-51.98 to 66.83	No	ns	>0.9999
1h:WT vs. 3h:ndrg1a -/-	4.102	-55.30 to 63.51	No	ns	>0.9999
1h:WT vs. 6h:WT	-12.17	-71.58 to 47.23	No	ns	>0.9999
1h:WT vs. 6h:ndrg1a -/-	3.152	-56.25 to 62.56	No	ns	>0.9999
1h:WT vs. 12h:WT	11.79	-47.61 to 71.20	No	ns	>0.9999
1h:WT vs. 12h:ndrg1a -/-	12.31	-47.09 to 71.72	No	ns	>0.9999
1h:ndrg1a -/- vs. 3h:WT	14.09	-45.32 to 73.49	No	ns	0.9997
1h:ndrg1a -/- vs. 3h:ndrg1a -/-	10.76	-48.65 to 70.16	No	ns	>0.9999
1h:ndrg1a -/- vs. 6h:WT	-5.518	-64.92 to 53.89	No	ns	>0.9999
1h:ndrg1a -/- vs. 6h:ndrg1a -/-	9.809	-49.60 to 69.21	No	ns	>0.9999
1h:ndrg1a -/- vs. 12h:WT	18.45	-40.95 to 77.86	No	ns	0.9966
1h:ndrg1a -/- vs. 12h:ndrg1a -/-	18.97	-40.44 to 78.37	No	ns	0.9957
3h:WT vs. 3h:ndrg1a -/-	-3.328	-45.33 to 38.68	No	ns	>0.9999
3h:WT vs. 6h:WT	-19.6	-61.61 to 22.40	No	ns	0.9226
3h:WT vs. 6h:ndrg1a -/-	-4.278	-46.28 to 37.73	No	ns	>0.9999
3h:WT vs. 12h:WT	4.364	-37.64 to 46.37	No	ns	>0.9999
3h:WT vs. 12h:ndrg1a -/-	4.882	-37.12 to 46.89	No	ns	>0.9999
3h:ndrg1a -/- vs. 6h:WT	-16.28	-58.28 to 25.73	No	ns	0.9793
3h:ndrg1a -/- vs. 6h:ndrg1a -/-	-0.9496	-42.96 to 41.06	No	ns	>0.9999
3h:ndrg1a -/- vs. 12h:WT	7.693	-34.31 to 49.70	No	ns	>0.9999
3h:ndrg1a -/- vs. 12h:ndrg1a -/-	8.211	-33.79 to 50.22	No	ns	>0.9999
6h:WT vs. 6h:ndrg1a -/-	15.33	-26.68 to 57.33	No	ns	0.987
6h:WT vs. 12h:WT	23.97	-18.04 to 65.97	No	ns	0.7584
6h:WT vs. 12h:ndrg1a -/-	24.49	-17.52 to 66.49	No	ns	0.7327
6h:ndrg1a -/- vs. 12h:WT	8.642	-33.36 to 50.65	No	ns	>0.9999
6h:ndrg1a -/- vs. 12h:ndrg1a -/-	9.16	-32.85 to 51.17	No	ns	0.9999
12h:WT vs. 12h:ndrg1a -/-	0.5181	-41.49 to 42.52	No	ns	>0.9999
Test details	Predicted (LS) mean 1	Predicted (LS) mean 2	Predicted (LS) mean diff.	SE of diff.	N1	N2	q	DF
24 hpf 0h:WT vs. 24 hpf 0h:ndrg1a -/-	5.546	6.303	-0.7569	6.917	30	30	0.1548	135
24 hpf 0h:WT vs. 27 hpf 0h:WT	5.546	3.043	2.503	8.471	30	15	0.4178	135
24 hpf 0h:WT vs. 27 hpf 0h:ndrg1a -/-	5.546	6.61	-1.064	9.15	30	12	0.1645	135
24 hpf 0h:WT vs. 1h:WT	5.546	101.4	-95.88	16.22	30	3	8.359	135
24 hpf 0h:WT vs. 1h:ndrg1a -/-	5.546	108.1	-102.5	16.22	30	3	8.94	135
24 hpf 0h:WT vs. 3h:WT	5.546	94	-88.46	10.18	30	9	12.29	135
24 hpf 0h:WT vs. 3h:ndrg1a -/-	5.546	97.33	-91.78	10.18	30	9	12.75	135
24 hpf 0h:WT vs. 6h:WT	5.546	113.6	-108.1	10.18	30	9	15.01	135
24 hpf 0h:WT vs. 6h:ndrg1a -/-	5.546	98.28	-92.73	10.18	30	9	12.88	135
24 hpf 0h:WT vs. 12h:WT	5.546	89.64	-84.09	10.18	30	9	11.68	135
24 hpf 0h:WT vs. 12h:ndrg1a -/-	5.546	89.12	-83.57	10.18	30	9	11.61	135
24 hpf 0h:ndrg1a -/- vs. 27 hpf 0h:WT	6.303	3.043	3.26	8.471	30	15	0.5442	135
24 hpf 0h:ndrg1a -/- vs. 27 hpf 0h:ndrg1a -/-	6.303	6.61	-0.3072	9.15	30	12	0.04748	135
24 hpf 0h:ndrg1a -/- vs. 1h:WT	6.303	101.4	-95.13	16.22	30	3	8.293	135
24 hpf 0h:ndrg1a -/- vs. 1h:ndrg1a -/-	6.303	108.1	-101.8	16.22	30	3	8.874	135
24 hpf 0h:ndrg1a -/- vs. 3h:WT	6.303	94	-87.7	10.18	30	9	12.18	135
24 hpf 0h:ndrg1a -/- vs. 3h:ndrg1a -/-	6.303	97.33	-91.03	10.18	30	9	12.64	135
24 hpf 0h:ndrg1a -/- vs. 6h:WT	6.303	113.6	-107.3	10.18	30	9	14.9	135
24 hpf 0h:ndrg1a -/- vs. 6h:ndrg1a -/-	6.303	98.28	-91.98	10.18	30	9	12.78	135
24 hpf 0h:ndrg1a -/- vs. 12h:WT	6.303	89.64	-83.33	10.18	30	9	11.58	135
24 hpf 0h:ndrg1a -/- vs. 12h:ndrg1a -/-	6.303	89.12	-82.82	10.18	30	9	11.5	135
27 hpf 0h:WT vs. 27 hpf 0h:ndrg1a -/-	3.043	6.61	-3.567	10.38	15	12	0.4862	135
27 hpf 0h:WT vs. 1h:WT	3.043	101.4	-98.39	16.94	15	3	8.212	135
27 hpf 0h:WT vs. 1h:ndrg1a -/-	3.043	108.1	-105	16.94	15	3	8.768	135
27 hpf 0h:WT vs. 3h:WT	3.043	94	-90.96	11.3	15	9	11.39	135
27 hpf 0h:WT vs. 3h:ndrg1a -/-	3.043	97.33	-94.29	11.3	15	9	11.8	135
27 hpf 0h:WT vs. 6h:WT	3.043	113.6	-110.6	11.3	15	9	13.84	135
27 hpf 0h:WT vs. 6h:ndrg1a -/-	3.043	98.28	-95.24	11.3	15	9	11.92	135
27 hpf 0h:WT vs. 12h:WT	3.043	89.64	-86.59	11.3	15	9	10.84	135
27 hpf 0h:WT vs. 12h:ndrg1a -/-	3.043	89.12	-86.08	11.3	15	9	10.78	135
27 hpf 0h:ndrg1a -/- vs. 1h:WT	6.61	101.4	-94.82	17.29	12	3	7.755	135
27 hpf 0h:ndrg1a -/- vs. 1h:ndrg1a -/-	6.61	108.1	-101.5	17.29	12	3	8.299	135
27 hpf 0h:ndrg1a -/- vs. 3h:WT	6.61	94	-87.39	11.81	12	9	10.46	135
27 hpf 0h:ndrg1a -/- vs. 3h:ndrg1a -/-	6.61	97.33	-90.72	11.81	12	9	10.86	135
27 hpf 0h:ndrg1a -/- vs. 6h:WT	6.61	113.6	-107	11.81	12	9	12.81	135
27 hpf 0h:ndrg1a -/- vs. 6h:ndrg1a -/-	6.61	98.28	-91.67	11.81	12	9	10.97	135
27 hpf 0h:ndrg1a -/- vs. 12h:WT	6.61	89.64	-83.03	11.81	12	9	9.94	135
27 hpf 0h:ndrg1a -/- vs. 12h:ndrg1a -/-	6.61	89.12	-82.51	11.81	12	9	9.878	135
1h:WT vs. 1h:ndrg1a -/-	101.4	108.1	-6.657	21.87	3	3	0.4304	135
1h:WT vs. 3h:WT	101.4	94	7.43	17.86	3	9	0.5883	135
1h:WT vs. 3h:ndrg1a -/-	101.4	97.33	4.102	17.86	3	9	0.3248	135
1h:WT vs. 6h:WT	101.4	113.6	-12.17	17.86	3	9	0.964	135
1h:WT vs. 6h:ndrg1a -/-	101.4	98.28	3.152	17.86	3	9	0.2496	135
1h:WT vs. 12h:WT	101.4	89.64	11.79	17.86	3	9	0.9339	135
1h:WT vs. 12h:ndrg1a -/-	101.4	89.12	12.31	17.86	3	9	0.975	135
1h:ndrg1a -/- vs. 3h:WT	108.1	94	14.09	17.86	3	9	1.115	135
1h:ndrg1a -/- vs. 3h:ndrg1a -/-	108.1	97.33	10.76	17.86	3	9	0.8519	135
1h:ndrg1a -/- vs. 6h:WT	108.1	113.6	-5.518	17.86	3	9	0.4369	135
1h:ndrg1a -/- vs. 6h:ndrg1a -/-	108.1	98.28	9.809	17.86	3	9	0.7767	135
1h:ndrg1a -/- vs. 12h:WT	108.1	89.64	18.45	17.86	3	9	1.461	135
1h:ndrg1a -/- vs. 12h:ndrg1a -/-	108.1	89.12	18.97	17.86	3	9	1.502	135
3h:WT vs. 3h:ndrg1a -/-	94	97.33	-3.328	12.63	9	9	0.3727	135
3h:WT vs. 6h:WT	94	113.6	-19.6	12.63	9	9	2.195	135
3h:WT vs. 6h:ndrg1a -/-	94	98.28	-4.278	12.63	9	9	0.4791	135
3h:WT vs. 12h:WT	94	89.64	4.364	12.63	9	9	0.4888	135
3h:WT vs. 12h:ndrg1a -/-	94	89.12	4.882	12.63	9	9	0.5468	135
3h:ndrg1a -/- vs. 6h:WT	97.33	113.6	-16.28	12.63	9	9	1.823	135
3h:ndrg1a -/- vs. 6h:ndrg1a -/-	97.33	98.28	-0.9496	12.63	9	9	0.1063	135
3h:ndrg1a -/- vs. 12h:WT	97.33	89.64	7.693	12.63	9	9	0.8615	135
3h:ndrg1a -/- vs. 12h:ndrg1a -/-	97.33	89.12	8.211	12.63	9	9	0.9195	135
6h:WT vs. 6h:ndrg1a -/-	113.6	98.28	15.33	12.63	9	9	1.716	135
6h:WT vs. 12h:WT	113.6	89.64	23.97	12.63	9	9	2.684	135
6h:WT vs. 12h:ndrg1a -/-	113.6	89.12	24.49	12.63	9	9	2.742	135
6h:ndrg1a -/- vs. 12h:WT	98.28	89.64	8.642	12.63	9	9	0.9678	135
6h:ndrg1a -/- vs. 12h:ndrg1a -/-	98.28	89.12	9.16	12.63	9	9	1.026	135
12h:WT vs. 12h:ndrg1a -/-	89.64	89.12	0.5181	12.63	9	9	0.05802	135
