# Supplementary material for: N-myc downstream regulated gene 1 (ndrg1) functions as a molecular switch for cellular adaptation to hypoxia
Source: eLife journal article supplement (doi:10.7554/elife.74031), 2022-09-16
Supplement: fig7-data1 [file Figure 7-Source Data 1.xlsx]

## Sheet: Source Data
	Hours in Azide (300uM)	WT																																								ndrg1a -/-
24 hpf 0h		1.00582	1.03492	1.08354		4.96978	5.03892	5.83957		2.8764	2.94113	2.90354	2.4347	2.62501	2.41171		4.58657	4.58891	4.58385			7.05288	6.99397	7.16411	5.49055	5.56025	5.61756	17.7766	17.6817	17.6548		4.66326	4.79055	4.79988	4.07204	4.08976	4.04266					1.09505	1.03864	1.15042		4.99931	4.93666	5.06487
27 hpf 0h										1.97045	1.95967	1.93999	1.04614	1.07201	0.565796		0.186161	0.220611	0.240776			6.29553	6.13518	6.27586	6.06388	5.87157	5.80328
3h										31.2408	31.379	32.2048	32.5906	32.4972	29.4151		37.0532	35.9085	34.6278
6h		19.6961	19.6961	21.3427		16.9959	18.7031	18.7031		37.5306	37.3929	29.9026	40.8824	40.7658	39.8411		37.5969	37.1563	37.2972																							21.3427	22.9892	22.9892		18.7031	20.4102	18.7031
12h		14.0738	14.9802	15.459		14.3101	14.5964	14.621		59.9076	59.9076	49.6767	65.4351	65.4351	59.9076		68.2341	74.5553	68.2341																							18.0496	15.5615	15.5037		14.5264	14.7316	14.5764
[truncated: 24 more columns]

## Sheet: ANOVA results
Table Analyzed	lactate azide revision wt 1a; 24hpf 27hpf 3h 6h 12h
Two-way ANOVA	Ordinary
Alpha	0.05
Source of Variation	% of total variation	P value	P value summary	Significant?
Interaction	0.1418	0.9612	ns	No
Row Factor	63.3	<0.0001	****	Yes
Column Factor	0.421	0.179	ns	No
ANOVA table	SS (Type III)	DF	MS	F (DFn, DFd)	P value
Interaction	103.4	4	25.86	F (4, 155) = 0.1535	P=0.9612
Row Factor	46161	4	11540	F (4, 155) = 68.50	P<0.0001
Column Factor	307	1	307	F (1, 155) = 1.822	P=0.1790
Residual	26115	155	168.5
Difference between column means
Predicted (LS) mean of WT	23.15
Predicted (LS) mean of ndrg1a -/-	26.1
Difference between predicted means	-2.943
SE of difference	2.181
95% CI of difference	-7.251 to 1.364
Data summary
Number of columns (Column Factor)	2
Number of rows (Row Factor)	5
Number of values	165

## Sheet: Multiple comparisons
Compare cell means regardless of rows and columns
Number of families	1
Number of comparisons per family	45
Alpha	0.05
Tukey's multiple comparisons test	Predicted (LS) mean diff.	95.00% CI of diff.	Below threshold?	Summary	Adjusted P Value
24 hpf 0h:WT vs. 24 hpf 0h:ndrg1a -/-	-0.7569	-11.52 to 10.00	No	ns	>0.9999
24 hpf 0h:WT vs. 27 hpf 0h:WT	2.503	-10.67 to 15.68	No	ns	0.9998
24 hpf 0h:WT vs. 27 hpf 0h:ndrg1a -/-	-1.064	-15.30 to 13.17	No	ns	>0.9999
24 hpf 0h:WT vs. 3h:WT	-27.44	-43.28 to -11.61	Yes	****	<0.0001
24 hpf 0h:WT vs. 3h:ndrg1a -/-	-29.35	-45.19 to -13.52	Yes	****	<0.0001
24 hpf 0h:WT vs. 6h:WT	-24.69	-37.87 to -11.51	Yes	****	<0.0001
24 hpf 0h:WT vs. 6h:ndrg1a -/-	-29.42	-42.60 to -16.25	Yes	****	<0.0001
24 hpf 0h:WT vs. 12h:WT	-38.41	-51.59 to -25.23	Yes	****	<0.0001
24 hpf 0h:WT vs. 12h:ndrg1a -/-	-42.16	-55.33 to -28.98	Yes	****	<0.0001
24 hpf 0h:ndrg1a -/- vs. 27 hpf 0h:WT	3.26	-9.918 to 16.44	No	ns	0.9986
24 hpf 0h:ndrg1a -/- vs. 27 hpf 0h:ndrg1a -/-	-0.3072	-14.54 to 13.93	No	ns	>0.9999
24 hpf 0h:ndrg1a -/- vs. 3h:WT	-26.69	-42.53 to -10.85	Yes	****	<0.0001
24 hpf 0h:ndrg1a -/- vs. 3h:ndrg1a -/-	-28.6	-44.43 to -12.76	Yes	****	<0.0001
24 hpf 0h:ndrg1a -/- vs. 6h:WT	-23.93	-37.11 to -10.75	Yes	****	<0.0001
24 hpf 0h:ndrg1a -/- vs. 6h:ndrg1a -/-	-28.67	-41.84 to -15.49	Yes	****	<0.0001
24 hpf 0h:ndrg1a -/- vs. 12h:WT	-37.65	-50.83 to -24.48	Yes	****	<0.0001
24 hpf 0h:ndrg1a -/- vs. 12h:ndrg1a -/-	-41.4	-54.58 to -28.22	Yes	****	<0.0001
27 hpf 0h:WT vs. 27 hpf 0h:ndrg1a -/-	-3.567	-19.71 to 12.57	No	ns	0.9994
27 hpf 0h:WT vs. 3h:WT	-29.95	-47.52 to -12.38	Yes	****	<0.0001
27 hpf 0h:WT vs. 3h:ndrg1a -/-	-31.86	-49.43 to -14.29	Yes	****	<0.0001
27 hpf 0h:WT vs. 6h:WT	-27.19	-42.41 to -11.97	Yes	****	<0.0001
27 hpf 0h:WT vs. 6h:ndrg1a -/-	-31.93	-47.14 to -16.71	Yes	****	<0.0001
27 hpf 0h:WT vs. 12h:WT	-40.91	-56.13 to -25.70	Yes	****	<0.0001
27 hpf 0h:WT vs. 12h:ndrg1a -/-	-44.66	-59.88 to -29.44	Yes	****	<0.0001
27 hpf 0h:ndrg1a -/- vs. 3h:WT	-26.38	-44.76 to -8.006	Yes	***	0.0004
27 hpf 0h:ndrg1a -/- vs. 3h:ndrg1a -/-	-28.29	-46.67 to -9.915	Yes	****	<0.0001
27 hpf 0h:ndrg1a -/- vs. 6h:WT	-23.62	-39.76 to -7.485	Yes	***	0.0002
27 hpf 0h:ndrg1a -/- vs. 6h:ndrg1a -/-	-28.36	-44.50 to -12.22	Yes	****	<0.0001
27 hpf 0h:ndrg1a -/- vs. 12h:WT	-37.35	-53.48 to -21.21	Yes	****	<0.0001
27 hpf 0h:ndrg1a -/- vs. 12h:ndrg1a -/-	-41.09	-57.23 to -24.95	Yes	****	<0.0001
3h:WT vs. 3h:ndrg1a -/-	-1.909	-21.55 to 17.73	No	ns	>0.9999
3h:WT vs. 6h:WT	2.757	-14.81 to 20.33	No	ns	>0.9999
3h:WT vs. 6h:ndrg1a -/-	-1.979	-19.55 to 15.59	No	ns	>0.9999
3h:WT vs. 12h:WT	-10.96	-28.53 to 6.605	No	ns	0.5979
3h:WT vs. 12h:ndrg1a -/-	-14.71	-32.28 to 2.858	No	ns	0.1878
3h:ndrg1a -/- vs. 6h:WT	4.666	-12.90 to 22.24	No	ns	0.9975
3h:ndrg1a -/- vs. 6h:ndrg1a -/-	-0.0698	-17.64 to 17.50	No	ns	>0.9999
3h:ndrg1a -/- vs. 12h:WT	-9.056	-26.63 to 8.514	No	ns	0.8187
3h:ndrg1a -/- vs. 12h:ndrg1a -/-	-12.8	-30.37 to 4.767	No	ns	0.3701
6h:WT vs. 6h:ndrg1a -/-	-4.736	-19.95 to 10.48	No	ns	0.9919
6h:WT vs. 12h:WT	-13.72	-28.94 to 1.494	No	ns	0.1159
6h:WT vs. 12h:ndrg1a -/-	-17.47	-32.69 to -2.254	Yes	*	0.0114
6h:ndrg1a -/- vs. 12h:WT	-8.986	-24.20 to 6.230	No	ns	0.6718
6h:ndrg1a -/- vs. 12h:ndrg1a -/-	-12.73	-27.95 to 2.483	No	ns	0.1885
12h:WT vs. 12h:ndrg1a -/-	-3.748	-18.96 to 11.47	No	ns	0.9986
Test details	Predicted (LS) mean 1	Predicted (LS) mean 2	Predicted (LS) mean diff.	SE of diff.	N1	N2	q	DF
24 hpf 0h:WT vs. 24 hpf 0h:ndrg1a -/-	5.546	6.303	-0.7569	3.351	30	30	0.3194	155
24 hpf 0h:WT vs. 27 hpf 0h:WT	5.546	3.043	2.503	4.105	30	15	0.8623	155
24 hpf 0h:WT vs. 27 hpf 0h:ndrg1a -/-	5.546	6.61	-1.064	4.434	30	12	0.3394	155
24 hpf 0h:WT vs. 3h:WT	5.546	32.99	-27.44	4.933	30	9	7.868	155
24 hpf 0h:WT vs. 3h:ndrg1a -/-	5.546	34.9	-29.35	4.933	30	9	8.415	155
24 hpf 0h:WT vs. 6h:WT	5.546	30.23	-24.69	4.105	30	15	8.506	155
24 hpf 0h:WT vs. 6h:ndrg1a -/-	5.546	34.97	-29.42	4.105	30	15	10.14	155
24 hpf 0h:WT vs. 12h:WT	5.546	43.96	-38.41	4.105	30	15	13.23	155
24 hpf 0h:WT vs. 12h:ndrg1a -/-	5.546	47.7	-42.16	4.105	30	15	14.52	155
24 hpf 0h:ndrg1a -/- vs. 27 hpf 0h:WT	6.303	3.043	3.26	4.105	30	15	1.123	155
24 hpf 0h:ndrg1a -/- vs. 27 hpf 0h:ndrg1a -/-	6.303	6.61	-0.3072	4.434	30	12	0.09798	155
24 hpf 0h:ndrg1a -/- vs. 3h:WT	6.303	32.99	-26.69	4.933	30	9	7.651	155
24 hpf 0h:ndrg1a -/- vs. 3h:ndrg1a -/-	6.303	34.9	-28.6	4.933	30	9	8.198	155
24 hpf 0h:ndrg1a -/- vs. 6h:WT	6.303	30.23	-23.93	4.105	30	15	8.245	155
24 hpf 0h:ndrg1a -/- vs. 6h:ndrg1a -/-	6.303	34.97	-28.67	4.105	30	15	9.877	155
24 hpf 0h:ndrg1a -/- vs. 12h:WT	6.303	43.96	-37.65	4.105	30	15	12.97	155
24 hpf 0h:ndrg1a -/- vs. 12h:ndrg1a -/-	6.303	47.7	-41.4	4.105	30	15	14.26	155
27 hpf 0h:WT vs. 27 hpf 0h:ndrg1a -/-	3.043	6.61	-3.567	5.027	15	12	1.003	155
27 hpf 0h:WT vs. 3h:WT	3.043	32.99	-29.95	5.473	15	9	7.739	155
27 hpf 0h:WT vs. 3h:ndrg1a -/-	3.043	34.9	-31.86	5.473	15	9	8.232	155
27 hpf 0h:WT vs. 6h:WT	3.043	30.23	-27.19	4.74	15	15	8.113	155
27 hpf 0h:WT vs. 6h:ndrg1a -/-	3.043	34.97	-31.93	4.74	15	15	9.526	155
27 hpf 0h:WT vs. 12h:WT	3.043	43.96	-40.91	4.74	15	15	12.21	155
27 hpf 0h:WT vs. 12h:ndrg1a -/-	3.043	47.7	-44.66	4.74	15	15	13.33	155
27 hpf 0h:ndrg1a -/- vs. 3h:WT	6.61	32.99	-26.38	5.724	12	9	6.518	155
27 hpf 0h:ndrg1a -/- vs. 3h:ndrg1a -/-	6.61	34.9	-28.29	5.724	12	9	6.99	155
27 hpf 0h:ndrg1a -/- vs. 6h:WT	6.61	30.23	-23.62	5.027	12	15	6.646	155
27 hpf 0h:ndrg1a -/- vs. 6h:ndrg1a -/-	6.61	34.97	-28.36	5.027	12	15	7.978	155
27 hpf 0h:ndrg1a -/- vs. 12h:WT	6.61	43.96	-37.35	5.027	12	15	10.51	155
27 hpf 0h:ndrg1a -/- vs. 12h:ndrg1a -/-	6.61	47.7	-41.09	5.027	12	15	11.56	155
3h:WT vs. 3h:ndrg1a -/-	32.99	34.9	-1.909	6.119	9	9	0.4413	155
3h:WT vs. 6h:WT	32.99	30.23	2.757	5.473	9	15	0.7125	155
3h:WT vs. 6h:ndrg1a -/-	32.99	34.97	-1.979	5.473	9	15	0.5114	155
3h:WT vs. 12h:WT	32.99	43.96	-10.96	5.473	9	15	2.833	155
3h:WT vs. 12h:ndrg1a -/-	32.99	47.7	-14.71	5.473	9	15	3.802	155
3h:ndrg1a -/- vs. 6h:WT	34.9	30.23	4.666	5.473	9	15	1.206	155
3h:ndrg1a -/- vs. 6h:ndrg1a -/-	34.9	34.97	-0.0698	5.473	9	15	0.01804	155
3h:ndrg1a -/- vs. 12h:WT	34.9	43.96	-9.056	5.473	9	15	2.34	155
3h:ndrg1a -/- vs. 12h:ndrg1a -/-	34.9	47.7	-12.8	5.473	9	15	3.308	155
6h:WT vs. 6h:ndrg1a -/-	30.23	34.97	-4.736	4.74	15	15	1.413	155
6h:WT vs. 12h:WT	30.23	43.96	-13.72	4.74	15	15	4.094	155
6h:WT vs. 12h:ndrg1a -/-	30.23	47.7	-17.47	4.74	15	15	5.213	155
6h:ndrg1a -/- vs. 12h:WT	34.97	43.96	-8.986	4.74	15	15	2.681	155
6h:ndrg1a -/- vs. 12h:ndrg1a -/-	34.97	47.7	-12.73	4.74	15	15	3.799	155
12h:WT vs. 12h:ndrg1a -/-	43.96	47.7	-3.748	4.74	15	15	1.118	155
