# Supplementary material for: N-myc downstream regulated gene 1 (ndrg1) functions as a molecular switch for cellular adaptation to hypoxia
Source: eLife journal article supplement (doi:10.7554/elife.74031), 2022-09-16
Supplement: fig7-data2 [file Figure 7-Source Data 2.xlsx]

## Sheet: Source Data
	Hours in anoxia	WT posterior pronephros
0		0.800369	0.823428	0.814113		0.725863	0.739339	0.750354		0.616969	0.578485	0.58134		0.778484	0.861316	0.776405
6		0.597143	0.57248	0.582974		0.439227	0.48445	0.409711		0.414999	0.402843	0.420718								0.804791	0.859011	0.87535	0.770227	0.698234	0.742836
12		0.344556	0.347402	0.358088		0.374903	0.422558	0.384868		0.280653	0.285981	0.31163		0.284655	0.287655	0.254867				0.365785	0.410162	0.414282	0.535774	0.497229	0.565593	0.587346	0.532526	0.546628	0.556404	0.631528	0.568107	0.604145	0.607617	0.581142
18		0.312345	0.33767	0.351747		0.385154	0.387248	0.408073		0.212548	0.22276	0.220716								0.412449	0.469161	0.460818	0.575242	0.59747	0.546164	0.381222	0.3346	0.344586	0.482844	0.517115	0.429128	0.622788	0.670443	0.589736	0.383961	0.464211	0.517815
24		0.186669	0.180062	0.192077		0.249991	0.257934	0.284987		0.343802	0.35397	0.39003								0.463358	0.378985	0.372606	0.329621	0.315661	0.363133	0.330013	0.357244	0.369703

## Sheet: ANOVA results
Table Analyzed	FINAL T1 and T2-2nd count FINAL ELIFE RESUB
Two-way ANOVA	Ordinary
Alpha	0.05
Source of Variation	% of total variation	P value	P value summary	Significant?
Interaction	5.751	<0.0001	****	Yes
Row Factor	3.826	<0.0001	****	Yes
Column Factor	69.74	<0.0001	****	Yes
ANOVA table	SS (Type III)	DF	MS	F (DFn, DFd)	P value
Interaction	1.261	12	0.1051	F (12, 352) = 10.42	P<0.0001
Row Factor	0.8392	4	0.2098	F (4, 352) = 20.79	P<0.0001
Column Factor	15.3	3	5.099	F (3, 352) = 505.2	P<0.0001
Residual	3.553	352	0.01009
Data summary
Number of columns (Column Factor)	4
Number of rows (Row Factor)	5
Number of values	372

## Sheet: Multiple comparisons
Compare cell means regardless of rows and columns
Number of families	1
Number of comparisons per family	190
Alpha	0.05
Tukey's multiple comparisons test	Predicted (LS) mean diff.	95.00% CI of diff.	Below threshold?	Summary	Adjusted P Value
0:WT posterior pronephros vs. 0:Group B	-0.09869	-0.2452 to 0.04778	No	ns	0.6563
0:WT posterior pronephros vs. 0:WT anterior pronephros	0.4853	0.3388 to 0.6318	Yes	****	<0.0001
0:WT posterior pronephros vs. 0:ndrg1a -/- anterior pronephros	0.3273	0.1808 to 0.4737	Yes	****	<0.0001
0:WT posterior pronephros vs. 6:WT posterior pronephros	0.1322	-0.006748 to 0.2712	No	ns	0.0847
0:WT posterior pronephros vs. 6:Group B	0.03232	-0.09751 to 0.1622	No	ns	>0.9999
0:WT posterior pronephros vs. 6:WT anterior pronephros	0.5472	0.4083 to 0.6862	Yes	****	<0.0001
0:WT posterior pronephros vs. 6:ndrg1a -/- anterior pronephros	0.4076	0.2777 to 0.5374	Yes	****	<0.0001
0:WT posterior pronephros vs. 12:WT posterior pronephros	0.2949	0.1704 to 0.4194	Yes	****	<0.0001
0:WT posterior pronephros vs. 12:Group B	0.009244	-0.1206 to 0.1391	No	ns	>0.9999
0:WT posterior pronephros vs. 12:WT anterior pronephros	0.5632	0.4387 to 0.6877	Yes	****	<0.0001
0:WT posterior pronephros vs. 12:ndrg1a -/- anterior pronephros	0.3385	0.2087 to 0.4683	Yes	****	<0.0001
0:WT posterior pronephros vs. 18:WT posterior pronephros	0.3062	0.1817 to 0.4306	Yes	****	<0.0001
0:WT posterior pronephros vs. 18:Group B	0.02392	-0.1150 to 0.1629	No	ns	>0.9999
0:WT posterior pronephros vs. 18:WT anterior pronephros	0.5969	0.4724 to 0.7213	Yes	****	<0.0001
0:WT posterior pronephros vs. 18:ndrg1a -/- anterior pronephros	0.303	0.1641 to 0.4420	Yes	****	<0.0001
0:WT posterior pronephros vs. 24:WT posterior pronephros	0.4194	0.2857 to 0.5531	Yes	****	<0.0001
0:WT posterior pronephros vs. 24:Group B	-0.05888	-0.1926 to 0.07483	No	ns	0.9908
0:WT posterior pronephros vs. 24:WT anterior pronephros	0.6341	0.5004 to 0.7679	Yes	****	<0.0001
0:WT posterior pronephros vs. 24:ndrg1a -/- anterior pronephros	0.3755	0.2418 to 0.5093	Yes	****	<0.0001
0:Group B vs. 0:WT anterior pronephros	0.584	0.4375 to 0.7305	Yes	****	<0.0001
0:Group B vs. 0:ndrg1a -/- anterior pronephros	0.4259	0.2795 to 0.5724	Yes	****	<0.0001
0:Group B vs. 6:WT posterior pronephros	0.2309	0.09194 to 0.3699	Yes	****	<0.0001
0:Group B vs. 6:Group B	0.131	0.001184 to 0.2608	Yes	*	0.0451
0:Group B vs. 6:WT anterior pronephros	0.6459	0.5069 to 0.7849	Yes	****	<0.0001
0:Group B vs. 6:ndrg1a -/- anterior pronephros	0.5062	0.3764 to 0.6361	Yes	****	<0.0001
0:Group B vs. 12:WT posterior pronephros	0.3936	0.2691 to 0.5181	Yes	****	<0.0001
0:Group B vs. 12:Group B	0.1079	-0.02190 to 0.2378	No	ns	0.2547
0:Group B vs. 12:WT anterior pronephros	0.6619	0.5374 to 0.7864	Yes	****	<0.0001
0:Group B vs. 12:ndrg1a -/- anterior pronephros	0.4372	0.3074 to 0.5670	Yes	****	<0.0001
0:Group B vs. 18:WT posterior pronephros	0.4049	0.2804 to 0.5293	Yes	****	<0.0001
0:Group B vs. 18:Group B	0.1226	-0.01635 to 0.2616	No	ns	0.1656
0:Group B vs. 18:WT anterior pronephros	0.6956	0.5711 to 0.8200	Yes	****	<0.0001
0:Group B vs. 18:ndrg1a -/- anterior pronephros	0.4017	0.2628 to 0.5407	Yes	****	<0.0001
0:Group B vs. 24:WT posterior pronephros	0.5181	0.3844 to 0.6518	Yes	****	<0.0001
0:Group B vs. 24:Group B	0.03981	-0.09390 to 0.1735	No	ns	>0.9999
0:Group B vs. 24:WT anterior pronephros	0.7328	0.5991 to 0.8665	Yes	****	<0.0001
0:Group B vs. 24:ndrg1a -/- anterior pronephros	0.4742	0.3405 to 0.6079	Yes	****	<0.0001
0:WT anterior pronephros vs. 0:ndrg1a -/- anterior pronephros	-0.158	-0.3045 to -0.01157	Yes	*	0.0194
0:WT anterior pronephros vs. 6:WT posterior pronephros	-0.3531	-0.4920 to -0.2141	Yes	****	<0.0001
0:WT anterior pronephros vs. 6:Group B	-0.453	-0.5828 to -0.3231	Yes	****	<0.0001
0:WT anterior pronephros vs. 6:WT anterior pronephros	0.06191	-0.07704 to 0.2009	No	ns	0.9894
0:WT anterior pronephros vs. 6:ndrg1a -/- anterior pronephros	-0.07774	-0.2076 to 0.05209	No	ns	0.8345
0:WT anterior pronephros vs. 12:WT posterior pronephros	-0.1904	-0.3149 to -0.06592	Yes	****	<0.0001
0:WT anterior pronephros vs. 12:Group B	-0.4761	-0.6059 to -0.3462	Yes	****	<0.0001
0:WT anterior pronephros vs. 12:WT anterior pronephros	0.07789	-0.04658 to 0.2024	No	ns	0.7768
0:WT anterior pronephros vs. 12:ndrg1a -/- anterior pronephros	-0.1468	-0.2766 to -0.01697	Yes	**	0.0099
0:WT anterior pronephros vs. 18:WT posterior pronephros	-0.1791	-0.3036 to -0.05465	Yes	****	<0.0001
0:WT anterior pronephros vs. 18:Group B	-0.4614	-0.6003 to -0.3224	Yes	****	<0.0001
0:WT anterior pronephros vs. 18:WT anterior pronephros	0.1116	-0.01291 to 0.2360	No	ns	0.1458
0:WT anterior pronephros vs. 18:ndrg1a -/- anterior pronephros	-0.1823	-0.3212 to -0.04333	Yes	***	0.0007
0:WT anterior pronephros vs. 24:WT posterior pronephros	-0.06586	-0.1996 to 0.06785	No	ns	0.9691
0:WT anterior pronephros vs. 24:Group B	-0.5442	-0.6779 to -0.4105	Yes	****	<0.0001
0:WT anterior pronephros vs. 24:WT anterior pronephros	0.1488	0.01514 to 0.2826	Yes	*	0.0125
0:WT anterior pronephros vs. 24:ndrg1a -/- anterior pronephros	-0.1098	-0.2435 to 0.02396	No	ns	0.2764
0:ndrg1a -/- anterior pronephros vs. 6:WT posterior pronephros	-0.195	-0.3340 to -0.05610	Yes	***	0.0002
0:ndrg1a -/- anterior pronephros vs. 6:Group B	-0.2949	-0.4248 to -0.1651	Yes	****	<0.0001
0:ndrg1a -/- anterior pronephros vs. 6:WT anterior pronephros	0.22	0.08100 to 0.3589	Yes	****	<0.0001
0:ndrg1a -/- anterior pronephros vs. 6:ndrg1a -/- anterior pronephros	0.0803	-0.04953 to 0.2101	No	ns	0.7932
0:ndrg1a -/- anterior pronephros vs. 12:WT posterior pronephros	-0.03235	-0.1568 to 0.09213	No	ns	>0.9999
0:ndrg1a -/- anterior pronephros vs. 12:Group B	-0.318	-0.4478 to -0.1882	Yes	****	<0.0001
0:ndrg1a -/- anterior pronephros vs. 12:WT anterior pronephros	0.2359	0.1115 to 0.3604	Yes	****	<0.0001
0:ndrg1a -/- anterior pronephros vs. 12:ndrg1a -/- anterior pronephros	0.01124	-0.1186 to 0.1411	No	ns	>0.9999
0:ndrg1a -/- anterior pronephros vs. 18:WT posterior pronephros	-0.02109	-0.1456 to 0.1034	No	ns	>0.9999
0:ndrg1a -/- anterior pronephros vs. 18:Group B	-0.3033	-0.4423 to -0.1644	Yes	****	<0.0001
0:ndrg1a -/- anterior pronephros vs. 18:WT anterior pronephros	0.2696	0.1451 to 0.3941	Yes	****	<0.0001
0:ndrg1a -/- anterior pronephros vs. 18:ndrg1a -/- anterior pronephros	-0.02424	-0.1632 to 0.1147	No	ns	>0.9999
0:ndrg1a -/- anterior pronephros vs. 24:WT posterior pronephros	0.09218	-0.04153 to 0.2259	No	ns	0.6139
0:ndrg1a -/- anterior pronephros vs. 24:Group B	-0.3861	-0.5198 to -0.2524	Yes	****	<0.0001
0:ndrg1a -/- anterior pronephros vs. 24:WT anterior pronephros	0.3069	0.1732 to 0.4406	Yes	****	<0.0001
0:ndrg1a -/- anterior pronephros vs. 24:ndrg1a -/- anterior pronephros	0.04829	-0.08542 to 0.1820	No	ns	0.9992
6:WT posterior pronephros vs. 6:Group B	-0.09988	-0.2212 to 0.02141	No	ns	0.2708
6:WT posterior pronephros vs. 6:WT anterior pronephros	0.415	0.2840 to 0.5460	Yes	****	<0.0001
6:WT posterior pronephros vs. 6:ndrg1a -/- anterior pronephros	0.2754	0.1541 to 0.3966	Yes	****	<0.0001
6:WT posterior pronephros vs. 12:WT posterior pronephros	0.1627	0.04716 to 0.2782	Yes	***	0.0001
6:WT posterior pronephros vs. 12:Group B	-0.123	-0.2442 to -0.001673	Yes	*	0.0427
6:WT posterior pronephros vs. 12:WT anterior pronephros	0.431	0.3154 to 0.5465	Yes	****	<0.0001
6:WT posterior pronephros vs. 12:ndrg1a -/- anterior pronephros	0.2063	0.08500 to 0.3276	Yes	****	<0.0001
6:WT posterior pronephros vs. 18:WT posterior pronephros	0.174	0.05843 to 0.2895	Yes	****	<0.0001
6:WT posterior pronephros vs. 18:Group B	-0.1083	-0.2393 to 0.02272	No	ns	0.2644
6:WT posterior pronephros vs. 18:WT anterior pronephros	0.4647	0.3491 to 0.5802	Yes	****	<0.0001
6:WT posterior pronephros vs. 18:ndrg1a -/- anterior pronephros	0.1708	0.03980 to 0.3018	Yes	***	0.0008
6:WT posterior pronephros vs. 24:WT posterior pronephros	0.2872	0.1618 to 0.4127	Yes	****	<0.0001
6:WT posterior pronephros vs. 24:Group B	-0.1911	-0.3165 to -0.06566	Yes	****	<0.0001
6:WT posterior pronephros vs. 24:WT anterior pronephros	0.5019	0.3765 to 0.6274	Yes	****	<0.0001
6:WT posterior pronephros vs. 24:ndrg1a -/- anterior pronephros	0.2433	0.1179 to 0.3688	Yes	****	<0.0001
6:Group B vs. 6:WT anterior pronephros	0.5149	0.3936 to 0.6362	Yes	****	<0.0001
6:Group B vs. 6:ndrg1a -/- anterior pronephros	0.3752	0.2645 to 0.4860	Yes	****	<0.0001
6:Group B vs. 12:WT posterior pronephros	0.2626	0.1582 to 0.3670	Yes	****	<0.0001
6:Group B vs. 12:Group B	-0.02308	-0.1338 to 0.08764	No	ns	>0.9999
6:Group B vs. 12:WT anterior pronephros	0.5309	0.4265 to 0.6353	Yes	****	<0.0001
6:Group B vs. 12:ndrg1a -/- anterior pronephros	0.3062	0.1954 to 0.4169	Yes	****	<0.0001
6:Group B vs. 18:WT posterior pronephros	0.2738	0.1695 to 0.3782	Yes	****	<0.0001
6:Group B vs. 18:Group B	-0.008409	-0.1297 to 0.1129	No	ns	>0.9999
6:Group B vs. 18:WT anterior pronephros	0.5645	0.4601 to 0.6689	Yes	****	<0.0001
6:Group B vs. 18:ndrg1a -/- anterior pronephros	0.2707	0.1494 to 0.3920	Yes	****	<0.0001
6:Group B vs. 24:WT posterior pronephros	0.3871	0.2719 to 0.5024	Yes	****	<0.0001
6:Group B vs. 24:Group B	-0.09121	-0.2064 to 0.02404	No	ns	0.3426
6:Group B vs. 24:WT anterior pronephros	0.6018	0.4866 to 0.7171	Yes	****	<0.0001
6:Group B vs. 24:ndrg1a -/- anterior pronephros	0.3432	0.2280 to 0.4585	Yes	****	<0.0001
6:WT anterior pronephros vs. 6:ndrg1a -/- anterior pronephros	-0.1397	-0.2609 to -0.01836	Yes	**	0.0075
6:WT anterior pronephros vs. 12:WT posterior pronephros	-0.2523	-0.3678 to -0.1368	Yes	****	<0.0001
6:WT anterior pronephros vs. 12:Group B	-0.538	-0.6593 to -0.4167	Yes	****	<0.0001
6:WT anterior pronephros vs. 12:WT anterior pronephros	0.01598	-0.09956 to 0.1315	No	ns	>0.9999
6:WT anterior pronephros vs. 12:ndrg1a -/- anterior pronephros	-0.2087	-0.3300 to -0.08743	Yes	****	<0.0001
6:WT anterior pronephros vs. 18:WT posterior pronephros	-0.241	-0.3566 to -0.1255	Yes	****	<0.0001
6:WT anterior pronephros vs. 18:Group B	-0.5233	-0.6543 to -0.3923	Yes	****	<0.0001
6:WT anterior pronephros vs. 18:WT anterior pronephros	0.04965	-0.06589 to 0.1652	No	ns	0.993
6:WT anterior pronephros vs. 18:ndrg1a -/- anterior pronephros	-0.2442	-0.3752 to -0.1132	Yes	****	<0.0001
6:WT anterior pronephros vs. 24:WT posterior pronephros	-0.1278	-0.2532 to -0.002344	Yes	*	0.0404
6:WT anterior pronephros vs. 24:Group B	-0.6061	-0.7315 to -0.4807	Yes	****	<0.0001
6:WT anterior pronephros vs. 24:WT anterior pronephros	0.08694	-0.03849 to 0.2124	No	ns	0.6038
6:WT anterior pronephros vs. 24:ndrg1a -/- anterior pronephros	-0.1717	-0.2971 to -0.04624	Yes	***	0.0003
6:ndrg1a -/- anterior pronephros vs. 12:WT posterior pronephros	-0.1127	-0.2170 to -0.008264	Yes	*	0.0194
6:ndrg1a -/- anterior pronephros vs. 12:Group B	-0.3983	-0.5090 to -0.2876	Yes	****	<0.0001
6:ndrg1a -/- anterior pronephros vs. 12:WT anterior pronephros	0.1556	0.05124 to 0.2600	Yes	****	<0.0001
6:ndrg1a -/- anterior pronephros vs. 12:ndrg1a -/- anterior pronephros	-0.06906	-0.1798 to 0.04166	No	ns	0.7814
6:ndrg1a -/- anterior pronephros vs. 18:WT posterior pronephros	-0.1014	-0.2058 to 0.002998	No	ns	0.0686
6:ndrg1a -/- anterior pronephros vs. 18:Group B	-0.3836	-0.5049 to -0.2624	Yes	****	<0.0001
6:ndrg1a -/- anterior pronephros vs. 18:WT anterior pronephros	0.1893	0.08491 to 0.2937	Yes	****	<0.0001
6:ndrg1a -/- anterior pronephros vs. 18:ndrg1a -/- anterior pronephros	-0.1045	-0.2258 to 0.01675	No	ns	0.1981
6:ndrg1a -/- anterior pronephros vs. 24:WT posterior pronephros	0.01188	-0.1034 to 0.1271	No	ns	>0.9999
6:ndrg1a -/- anterior pronephros vs. 24:Group B	-0.4664	-0.5817 to -0.3512	Yes	****	<0.0001
6:ndrg1a -/- anterior pronephros vs. 24:WT anterior pronephros	0.2266	0.1113 to 0.3418	Yes	****	<0.0001
6:ndrg1a -/- anterior pronephros vs. 24:ndrg1a -/- anterior pronephros	-0.03201	-0.1473 to 0.08323	No	ns	>0.9999
12:WT posterior pronephros vs. 12:Group B	-0.2857	-0.3901 to -0.1813	Yes	****	<0.0001
12:WT posterior pronephros vs. 12:WT anterior pronephros	0.2683	0.1706 to 0.3659	Yes	****	<0.0001
12:WT posterior pronephros vs. 12:ndrg1a -/- anterior pronephros	0.04359	-0.06080 to 0.1480	No	ns	0.9951
12:WT posterior pronephros vs. 18:WT posterior pronephros	0.01126	-0.08638 to 0.1089	No	ns	>0.9999
12:WT posterior pronephros vs. 18:Group B	-0.271	-0.3865 to -0.1555	Yes	****	<0.0001
12:WT posterior pronephros vs. 18:WT anterior pronephros	0.302	0.2043 to 0.3996	Yes	****	<0.0001
12:WT posterior pronephros vs. 18:ndrg1a -/- anterior pronephros	0.008111	-0.1074 to 0.1236	No	ns	>0.9999
12:WT posterior pronephros vs. 24:WT posterior pronephros	0.1245	0.01536 to 0.2337	Yes	**	0.0086
12:WT posterior pronephros vs. 24:Group B	-0.3538	-0.4630 to -0.2446	Yes	****	<0.0001
12:WT posterior pronephros vs. 24:WT anterior pronephros	0.3392	0.2301 to 0.4484	Yes	****	<0.0001
12:WT posterior pronephros vs. 24:ndrg1a -/- anterior pronephros	0.08064	-0.02853 to 0.1898	No	ns	0.4783
12:Group B vs. 12:WT anterior pronephros	0.5539	0.4496 to 0.6583	Yes	****	<0.0001
12:Group B vs. 12:ndrg1a -/- anterior pronephros	0.3293	0.2185 to 0.4400	Yes	****	<0.0001
12:Group B vs. 18:WT posterior pronephros	0.2969	0.1925 to 0.4013	Yes	****	<0.0001
12:Group B vs. 18:Group B	0.01467	-0.1066 to 0.1360	No	ns	>0.9999
12:Group B vs. 18:WT anterior pronephros	0.5876	0.4832 to 0.6920	Yes	****	<0.0001
12:Group B vs. 18:ndrg1a -/- anterior pronephros	0.2938	0.1725 to 0.4151	Yes	****	<0.0001
12:Group B vs. 24:WT posterior pronephros	0.4102	0.2950 to 0.5254	Yes	****	<0.0001
12:Group B vs. 24:Group B	-0.06813	-0.1834 to 0.04712	No	ns	0.8491
12:Group B vs. 24:WT anterior pronephros	0.6249	0.5097 to 0.7401	Yes	****	<0.0001
12:Group B vs. 24:ndrg1a -/- anterior pronephros	0.3663	0.2511 to 0.4815	Yes	****	<0.0001
12:WT anterior pronephros vs. 12:ndrg1a -/- anterior pronephros	-0.2247	-0.3291 to -0.1203	Yes	****	<0.0001
12:WT anterior pronephros vs. 18:WT posterior pronephros	-0.257	-0.3547 to -0.1594	Yes	****	<0.0001
12:WT anterior pronephros vs. 18:Group B	-0.5393	-0.6548 to -0.4237	Yes	****	<0.0001
12:WT anterior pronephros vs. 18:WT anterior pronephros	0.03367	-0.06398 to 0.1313	No	ns	0.9996
12:WT anterior pronephros vs. 18:ndrg1a -/- anterior pronephros	-0.2602	-0.3757 to -0.1446	Yes	****	<0.0001
12:WT anterior pronephros vs. 24:WT posterior pronephros	-0.1438	-0.2529 to -0.03458	Yes	***	0.0006
12:WT anterior pronephros vs. 24:Group B	-0.6221	-0.7312 to -0.5129	Yes	****	<0.0001
12:WT anterior pronephros vs. 24:WT anterior pronephros	0.07096	-0.03822 to 0.1801	No	ns	0.7185
12:WT anterior pronephros vs. 24:ndrg1a -/- anterior pronephros	-0.1876	-0.2968 to -0.07847	Yes	****	<0.0001
12:ndrg1a -/- anterior pronephros vs. 18:WT posterior pronephros	-0.03233	-0.1367 to 0.07206	No	ns	>0.9999
12:ndrg1a -/- anterior pronephros vs. 18:Group B	-0.3146	-0.4359 to -0.1933	Yes	****	<0.0001
12:ndrg1a -/- anterior pronephros vs. 18:WT anterior pronephros	0.2584	0.1540 to 0.3628	Yes	****	<0.0001
12:ndrg1a -/- anterior pronephros vs. 18:ndrg1a -/- anterior pronephros	-0.03548	-0.1568 to 0.08581	No	ns	>0.9999
12:ndrg1a -/- anterior pronephros vs. 24:WT posterior pronephros	0.08094	-0.03430 to 0.1962	No	ns	0.5782
12:ndrg1a -/- anterior pronephros vs. 24:Group B	-0.3974	-0.5126 to -0.2821	Yes	****	<0.0001
12:ndrg1a -/- anterior pronephros vs. 24:WT anterior pronephros	0.2957	0.1804 to 0.4109	Yes	****	<0.0001
12:ndrg1a -/- anterior pronephros vs. 24:ndrg1a -/- anterior pronephros	0.03705	-0.07819 to 0.1523	No	ns	0.9999
18:WT posterior pronephros vs. 18:Group B	-0.2823	-0.3978 to -0.1667	Yes	****	<0.0001
18:WT posterior pronephros vs. 18:WT anterior pronephros	0.2907	0.1930 to 0.3883	Yes	****	<0.0001
18:WT posterior pronephros vs. 18:ndrg1a -/- anterior pronephros	-0.003151	-0.1187 to 0.1124	No	ns	>0.9999
18:WT posterior pronephros vs. 24:WT posterior pronephros	0.1133	0.004096 to 0.2224	Yes	*	0.0323
18:WT posterior pronephros vs. 24:Group B	-0.365	-0.4742 to -0.2559	Yes	****	<0.0001
18:WT posterior pronephros vs. 24:WT anterior pronephros	0.328	0.2188 to 0.4371	Yes	****	<0.0001
18:WT posterior pronephros vs. 24:ndrg1a -/- anterior pronephros	0.06938	-0.03980 to 0.1785	No	ns	0.7541
18:Group B vs. 18:WT anterior pronephros	0.5729	0.4574 to 0.6885	Yes	****	<0.0001
18:Group B vs. 18:ndrg1a -/- anterior pronephros	0.2791	0.1481 to 0.4101	Yes	****	<0.0001
18:Group B vs. 24:WT posterior pronephros	0.3955	0.2701 to 0.5210	Yes	****	<0.0001
18:Group B vs. 24:Group B	-0.0828	-0.2082 to 0.04263	No	ns	0.6925
18:Group B vs. 24:WT anterior pronephros	0.6102	0.4848 to 0.7357	Yes	****	<0.0001
18:Group B vs. 24:ndrg1a -/- anterior pronephros	0.3516	0.2262 to 0.4771	Yes	****	<0.0001
18:WT anterior pronephros vs. 18:ndrg1a -/- anterior pronephros	-0.2938	-0.4094 to -0.1783	Yes	****	<0.0001
18:WT anterior pronephros vs. 24:WT posterior pronephros	-0.1774	-0.2866 to -0.06825	Yes	****	<0.0001
18:WT anterior pronephros vs. 24:Group B	-0.6557	-0.7649 to -0.5466	Yes	****	<0.0001
18:WT anterior pronephros vs. 24:WT anterior pronephros	0.03729	-0.07189 to 0.1465	No	ns	0.9997
18:WT anterior pronephros vs. 24:ndrg1a -/- anterior pronephros	-0.2213	-0.3305 to -0.1121	Yes	****	<0.0001
18:ndrg1a -/- anterior pronephros vs. 24:WT posterior pronephros	0.1164	-0.009010 to 0.2418	No	ns	0.1073
18:ndrg1a -/- anterior pronephros vs. 24:Group B	-0.3619	-0.4873 to -0.2365	Yes	****	<0.0001
18:ndrg1a -/- anterior pronephros vs. 24:WT anterior pronephros	0.3311	0.2057 to 0.4566	Yes	****	<0.0001
18:ndrg1a -/- anterior pronephros vs. 24:ndrg1a -/- anterior pronephros	0.07253	-0.05290 to 0.1980	No	ns	0.8721
24:WT posterior pronephros vs. 24:Group B	-0.4783	-0.5979 to -0.3587	Yes	****	<0.0001
24:WT posterior pronephros vs. 24:WT anterior pronephros	0.2147	0.09512 to 0.3343	Yes	****	<0.0001
24:WT posterior pronephros vs. 24:ndrg1a -/- anterior pronephros	-0.04389	-0.1635 to 0.07570	No	ns	0.9991
24:Group B vs. 24:WT anterior pronephros	0.693	0.5734 to 0.8126	Yes	****	<0.0001
24:Group B vs. 24:ndrg1a -/- anterior pronephros	0.4344	0.3148 to 0.5540	Yes	****	<0.0001
24:WT anterior pronephros vs. 24:ndrg1a -/- anterior pronephros	-0.2586	-0.3782 to -0.1390	Yes	****	<0.0001
Test details	Predicted (LS) mean 1	Predicted (LS) mean 2	Predicted (LS) mean diff.	SE of diff.	N1	N2	q	DF
0:WT posterior pronephros vs. 0:Group B	0.7372	0.8359	-0.09869	0.04101	12	12	3.403	352
0:WT posterior pronephros vs. 0:WT anterior pronephros	0.7372	0.2519	0.4853	0.04101	12	12	16.73	352
0:WT posterior pronephros vs. 0:ndrg1a -/- anterior pronephros	0.7372	0.4099	0.3273	0.04101	12	12	11.28	352
0:WT posterior pronephros vs. 6:WT posterior pronephros	0.7372	0.605	0.1322	0.03891	12	15	4.805	352
0:WT posterior pronephros vs. 6:Group B	0.7372	0.7049	0.03232	0.03635	12	21	1.257	352
0:WT posterior pronephros vs. 6:WT anterior pronephros	0.7372	0.19	0.5472	0.03891	12	15	19.89	352
0:WT posterior pronephros vs. 6:ndrg1a -/- anterior pronephros	0.7372	0.3296	0.4076	0.03635	12	21	15.85	352
0:WT posterior pronephros vs. 12:WT posterior pronephros	0.7372	0.4423	0.2949	0.03485	12	27	11.97	352
0:WT posterior pronephros vs. 12:Group B	0.7372	0.728	0.009244	0.03635	12	21	0.3596	352
0:WT posterior pronephros vs. 12:WT anterior pronephros	0.7372	0.174	0.5632	0.03485	12	27	22.85	352
0:WT posterior pronephros vs. 12:ndrg1a -/- anterior pronephros	0.7372	0.3987	0.3385	0.03635	12	21	13.17	352
0:WT posterior pronephros vs. 18:WT posterior pronephros	0.7372	0.431	0.3062	0.03485	12	27	12.42	352
0:WT posterior pronephros vs. 18:Group B	0.7372	0.7133	0.02392	0.03891	12	15	0.8692	352
0:WT posterior pronephros vs. 18:WT anterior pronephros	0.7372	0.1403	0.5969	0.03485	12	27	24.22	352
0:WT posterior pronephros vs. 18:ndrg1a -/- anterior pronephros	0.7372	0.4342	0.303	0.03891	12	15	11.01	352
0:WT posterior pronephros vs. 24:WT posterior pronephros	0.7372	0.3178	0.4194	0.03744	12	18	15.84	352
0:WT posterior pronephros vs. 24:Group B	0.7372	0.7961	-0.05888	0.03744	12	18	2.224	352
0:WT posterior pronephros vs. 24:WT anterior pronephros	0.7372	0.1031	0.6341	0.03744	12	18	23.95	352
0:WT posterior pronephros vs. 24:ndrg1a -/- anterior pronephros	0.7372	0.3617	0.3755	0.03744	12	18	14.19	352
0:Group B vs. 0:WT anterior pronephros	0.8359	0.2519	0.584	0.04101	12	12	20.14	352
0:Group B vs. 0:ndrg1a -/- anterior pronephros	0.8359	0.4099	0.4259	0.04101	12	12	14.69	352
0:Group B vs. 6:WT posterior pronephros	0.8359	0.605	0.2309	0.03891	12	15	8.392	352
0:Group B vs. 6:Group B	0.8359	0.7049	0.131	0.03635	12	21	5.097	352
0:Group B vs. 6:WT anterior pronephros	0.8359	0.19	0.6459	0.03891	12	15	23.48	352
0:Group B vs. 6:ndrg1a -/- anterior pronephros	0.8359	0.3296	0.5062	0.03635	12	21	19.69	352
0:Group B vs. 12:WT posterior pronephros	0.8359	0.4423	0.3936	0.03485	12	27	15.97	352
0:Group B vs. 12:Group B	0.8359	0.728	0.1079	0.03635	12	21	4.199	352
0:Group B vs. 12:WT anterior pronephros	0.8359	0.174	0.6619	0.03485	12	27	26.86	352
0:Group B vs. 12:ndrg1a -/- anterior pronephros	0.8359	0.3987	0.4372	0.03635	12	21	17.01	352
0:Group B vs. 18:WT posterior pronephros	0.8359	0.431	0.4049	0.03485	12	27	16.43	352
0:Group B vs. 18:Group B	0.8359	0.7133	0.1226	0.03891	12	15	4.456	352
0:Group B vs. 18:WT anterior pronephros	0.8359	0.1403	0.6956	0.03485	12	27	28.22	352
0:Group B vs. 18:ndrg1a -/- anterior pronephros	0.8359	0.4342	0.4017	0.03891	12	15	14.6	352
0:Group B vs. 24:WT posterior pronephros	0.8359	0.3178	0.5181	0.03744	12	18	19.57	352
0:Group B vs. 24:Group B	0.8359	0.7961	0.03981	0.03744	12	18	1.504	352
0:Group B vs. 24:WT anterior pronephros	0.8359	0.1031	0.7328	0.03744	12	18	27.68	352
0:Group B vs. 24:ndrg1a -/- anterior pronephros	0.8359	0.3617	0.4742	0.03744	12	18	17.91	352
0:WT anterior pronephros vs. 0:ndrg1a -/- anterior pronephros	0.2519	0.4099	-0.158	0.04101	12	12	5.45	352
0:WT anterior pronephros vs. 6:WT posterior pronephros	0.2519	0.605	-0.3531	0.03891	12	15	12.83	352
0:WT anterior pronephros vs. 6:Group B	0.2519	0.7049	-0.453	0.03635	12	21	17.62	352
0:WT anterior pronephros vs. 6:WT anterior pronephros	0.2519	0.19	0.06191	0.03891	12	15	2.25	352
0:WT anterior pronephros vs. 6:ndrg1a -/- anterior pronephros	0.2519	0.3296	-0.07774	0.03635	12	21	3.024	352
0:WT anterior pronephros vs. 12:WT posterior pronephros	0.2519	0.4423	-0.1904	0.03485	12	27	7.725	352
0:WT anterior pronephros vs. 12:Group B	0.2519	0.728	-0.4761	0.03635	12	21	18.52	352
0:WT anterior pronephros vs. 12:WT anterior pronephros	0.2519	0.174	0.07789	0.03485	12	27	3.161	352
0:WT anterior pronephros vs. 12:ndrg1a -/- anterior pronephros	0.2519	0.3987	-0.1468	0.03635	12	21	5.711	352
0:WT anterior pronephros vs. 18:WT posterior pronephros	0.2519	0.431	-0.1791	0.03485	12	27	7.268	352
0:WT anterior pronephros vs. 18:Group B	0.2519	0.7133	-0.4614	0.03891	12	15	16.77	352
0:WT anterior pronephros vs. 18:WT anterior pronephros	0.2519	0.1403	0.1116	0.03485	12	27	4.527	352
0:WT anterior pronephros vs. 18:ndrg1a -/- anterior pronephros	0.2519	0.4342	-0.1823	0.03891	12	15	6.625	352
0:WT anterior pronephros vs. 24:WT posterior pronephros	0.2519	0.3178	-0.06586	0.03744	12	18	2.488	352
0:WT anterior pronephros vs. 24:Group B	0.2519	0.7961	-0.5442	0.03744	12	18	20.56	352
0:WT anterior pronephros vs. 24:WT anterior pronephros	0.2519	0.1031	0.1488	0.03744	12	18	5.622	352
0:WT anterior pronephros vs. 24:ndrg1a -/- anterior pronephros	0.2519	0.3617	-0.1098	0.03744	12	18	4.146	352
0:ndrg1a -/- anterior pronephros vs. 6:WT posterior pronephros	0.4099	0.605	-0.195	0.03891	12	15	7.089	352
0:ndrg1a -/- anterior pronephros vs. 6:Group B	0.4099	0.7049	-0.2949	0.03635	12	21	11.47	352
0:ndrg1a -/- anterior pronephros vs. 6:WT anterior pronephros	0.4099	0.19	0.22	0.03891	12	15	7.995	352
0:ndrg1a -/- anterior pronephros vs. 6:ndrg1a -/- anterior pronephros	0.4099	0.3296	0.0803	0.03635	12	21	3.124	352
0:ndrg1a -/- anterior pronephros vs. 12:WT posterior pronephros	0.4099	0.4423	-0.03235	0.03485	12	27	1.313	352
0:ndrg1a -/- anterior pronephros vs. 12:Group B	0.4099	0.728	-0.318	0.03635	12	21	12.37	352
0:ndrg1a -/- anterior pronephros vs. 12:WT anterior pronephros	0.4099	0.174	0.2359	0.03485	12	27	9.573	352
0:ndrg1a -/- anterior pronephros vs. 12:ndrg1a -/- anterior pronephros	0.4099	0.3987	0.01124	0.03635	12	21	0.4372	352
0:ndrg1a -/- anterior pronephros vs. 18:WT posterior pronephros	0.4099	0.431	-0.02109	0.03485	12	27	0.8556	352
0:ndrg1a -/- anterior pronephros vs. 18:Group B	0.4099	0.7133	-0.3033	0.03891	12	15	11.03	352
0:ndrg1a -/- anterior pronephros vs. 18:WT anterior pronephros	0.4099	0.1403	0.2696	0.03485	12	27	10.94	352
0:ndrg1a -/- anterior pronephros vs. 18:ndrg1a -/- anterior pronephros	0.4099	0.4342	-0.02424	0.03891	12	15	0.881	352
0:ndrg1a -/- anterior pronephros vs. 24:WT posterior pronephros	0.4099	0.3178	0.09218	0.03744	12	18	3.482	352
0:ndrg1a -/- anterior pronephros vs. 24:Group B	0.4099	0.7961	-0.3861	0.03744	12	18	14.59	352
0:ndrg1a -/- anterior pronephros vs. 24:WT anterior pronephros	0.4099	0.1031	0.3069	0.03744	12	18	11.59	352
0:ndrg1a -/- anterior pronephros vs. 24:ndrg1a -/- anterior pronephros	0.4099	0.3617	0.04829	0.03744	12	18	1.824	352
6:WT posterior pronephros vs. 6:Group B	0.605	0.7049	-0.09988	0.03396	15	21	4.159	352
6:WT posterior pronephros vs. 6:WT anterior pronephros	0.605	0.19	0.415	0.03668	15	15	16	352
6:WT posterior pronephros vs. 6:ndrg1a -/- anterior pronephros	0.605	0.3296	0.2754	0.03396	15	21	11.47	352
6:WT posterior pronephros vs. 12:WT posterior pronephros	0.605	0.4423	0.1627	0.03235	15	27	7.112	352
6:WT posterior pronephros vs. 12:Group B	0.605	0.728	-0.123	0.03396	15	21	5.12	352
6:WT posterior pronephros vs. 12:WT anterior pronephros	0.605	0.174	0.431	0.03235	15	27	18.84	352
6:WT posterior pronephros vs. 12:ndrg1a -/- anterior pronephros	0.605	0.3987	0.2063	0.03396	15	21	8.59	352
6:WT posterior pronephros vs. 18:WT posterior pronephros	0.605	0.431	0.174	0.03235	15	27	7.605	352
6:WT posterior pronephros vs. 18:Group B	0.605	0.7133	-0.1083	0.03668	15	15	4.175	352
6:WT posterior pronephros vs. 18:WT anterior pronephros	0.605	0.1403	0.4647	0.03235	15	27	20.31	352
6:WT posterior pronephros vs. 18:ndrg1a -/- anterior pronephros	0.605	0.4342	0.1708	0.03668	15	15	6.585	352
6:WT posterior pronephros vs. 24:WT posterior pronephros	0.605	0.3178	0.2872	0.03512	15	18	11.57	352
6:WT posterior pronephros vs. 24:Group B	0.605	0.7961	-0.1911	0.03512	15	18	7.694	352
6:WT posterior pronephros vs. 24:WT anterior pronephros	0.605	0.1031	0.5019	0.03512	15	18	20.21	352
6:WT posterior pronephros vs. 24:ndrg1a -/- anterior pronephros	0.605	0.3617	0.2433	0.03512	15	18	9.798	352
6:Group B vs. 6:WT anterior pronephros	0.7049	0.19	0.5149	0.03396	21	15	21.44	352
6:Group B vs. 6:ndrg1a -/- anterior pronephros	0.7049	0.3296	0.3752	0.031	21	21	17.12	352
6:Group B vs. 12:WT posterior pronephros	0.7049	0.4423	0.2626	0.02923	21	27	12.7	352
6:Group B vs. 12:Group B	0.7049	0.728	-0.02308	0.031	21	21	1.053	352
6:Group B vs. 12:WT anterior pronephros	0.7049	0.174	0.5309	0.02923	21	27	25.68	352
6:Group B vs. 12:ndrg1a -/- anterior pronephros	0.7049	0.3987	0.3062	0.031	21	21	13.97	352
6:Group B vs. 18:WT posterior pronephros	0.7049	0.431	0.2738	0.02923	21	27	13.25	352
6:Group B vs. 18:Group B	0.7049	0.7133	-0.008409	0.03396	21	15	0.3502	352
6:Group B vs. 18:WT anterior pronephros	0.7049	0.1403	0.5645	0.02923	21	27	27.31	352
6:Group B vs. 18:ndrg1a -/- anterior pronephros	0.7049	0.4342	0.2707	0.03396	21	15	11.27	352
6:Group B vs. 24:WT posterior pronephros	0.7049	0.3178	0.3871	0.03227	21	18	16.97	352
6:Group B vs. 24:Group B	0.7049	0.7961	-0.09121	0.03227	21	18	3.997	352
6:Group B vs. 24:WT anterior pronephros	0.7049	0.1031	0.6018	0.03227	21	18	26.38	352
6:Group B vs. 24:ndrg1a -/- anterior pronephros	0.7049	0.3617	0.3432	0.03227	21	18	15.04	352
6:WT anterior pronephros vs. 6:ndrg1a -/- anterior pronephros	0.19	0.3296	-0.1397	0.03396	15	21	5.815	352
6:WT anterior pronephros vs. 12:WT posterior pronephros	0.19	0.4423	-0.2523	0.03235	15	27	11.03	352
6:WT anterior pronephros vs. 12:Group B	0.19	0.728	-0.538	0.03396	15	21	22.4	352
6:WT anterior pronephros vs. 12:WT anterior pronephros	0.19	0.174	0.01598	0.03235	15	27	0.6986	352
6:WT anterior pronephros vs. 12:ndrg1a -/- anterior pronephros	0.19	0.3987	-0.2087	0.03396	15	21	8.691	352
6:WT anterior pronephros vs. 18:WT posterior pronephros	0.19	0.431	-0.241	0.03235	15	27	10.54	352
6:WT anterior pronephros vs. 18:Group B	0.19	0.7133	-0.5233	0.03668	15	15	20.17	352
6:WT anterior pronephros vs. 18:WT anterior pronephros	0.19	0.1403	0.04965	0.03235	15	27	2.17	352
6:WT anterior pronephros vs. 18:ndrg1a -/- anterior pronephros	0.19	0.4342	-0.2442	0.03668	15	15	9.414	352
6:WT anterior pronephros vs. 24:WT posterior pronephros	0.19	0.3178	-0.1278	0.03512	15	18	5.145	352
6:WT anterior pronephros vs. 24:Group B	0.19	0.7961	-0.6061	0.03512	15	18	24.4	352
6:WT anterior pronephros vs. 24:WT anterior pronephros	0.19	0.1031	0.08694	0.03512	15	18	3.501	352
6:WT anterior pronephros vs. 24:ndrg1a -/- anterior pronephros	0.19	0.3617	-0.1717	0.03512	15	18	6.912	352
6:ndrg1a -/- anterior pronephros vs. 12:WT posterior pronephros	0.3296	0.4423	-0.1127	0.02923	21	27	5.45	352
6:ndrg1a -/- anterior pronephros vs. 12:Group B	0.3296	0.728	-0.3983	0.031	21	21	18.17	352
6:ndrg1a -/- anterior pronephros vs. 12:WT anterior pronephros	0.3296	0.174	0.1556	0.02923	21	27	7.53	352
6:ndrg1a -/- anterior pronephros vs. 12:ndrg1a -/- anterior pronephros	0.3296	0.3987	-0.06906	0.031	21	21	3.15	352
6:ndrg1a -/- anterior pronephros vs. 18:WT posterior pronephros	0.3296	0.431	-0.1014	0.02923	21	27	4.905	352
6:ndrg1a -/- anterior pronephros vs. 18:Group B	0.3296	0.7133	-0.3836	0.03396	21	15	15.98	352
6:ndrg1a -/- anterior pronephros vs. 18:WT anterior pronephros	0.3296	0.1403	0.1893	0.02923	21	27	9.159	352
6:ndrg1a -/- anterior pronephros vs. 18:ndrg1a -/- anterior pronephros	0.3296	0.4342	-0.1045	0.03396	21	15	4.353	352
6:ndrg1a -/- anterior pronephros vs. 24:WT posterior pronephros	0.3296	0.3178	0.01188	0.03227	21	18	0.5205	352
6:ndrg1a -/- anterior pronephros vs. 24:Group B	0.3296	0.7961	-0.4664	0.03227	21	18	20.44	352
6:ndrg1a -/- anterior pronephros vs. 24:WT anterior pronephros	0.3296	0.1031	0.2266	0.03227	21	18	9.93	352
6:ndrg1a -/- anterior pronephros vs. 24:ndrg1a -/- anterior pronephros	0.3296	0.3617	-0.03201	0.03227	21	18	1.403	352
12:WT posterior pronephros vs. 12:Group B	0.4423	0.728	-0.2857	0.02923	27	21	13.82	352
12:WT posterior pronephros vs. 12:WT anterior pronephros	0.4423	0.174	0.2683	0.02734	27	27	13.88	352
12:WT posterior pronephros vs. 12:ndrg1a -/- anterior pronephros	0.4423	0.3987	0.04359	0.02923	27	21	2.109	352
12:WT posterior pronephros vs. 18:WT posterior pronephros	0.4423	0.431	0.01126	0.02734	27	27	0.5825	352
12:WT posterior pronephros vs. 18:Group B	0.4423	0.7133	-0.271	0.03235	27	15	11.85	352
12:WT posterior pronephros vs. 18:WT anterior pronephros	0.4423	0.1403	0.302	0.02734	27	27	15.62	352
12:WT posterior pronephros vs. 18:ndrg1a -/- anterior pronephros	0.4423	0.4342	0.008111	0.03235	27	15	0.3546	352
12:WT posterior pronephros vs. 24:WT posterior pronephros	0.4423	0.3178	0.1245	0.03057	27	18	5.761	352
12:WT posterior pronephros vs. 24:Group B	0.4423	0.7961	-0.3538	0.03057	27	18	16.37	352
12:WT posterior pronephros vs. 24:WT anterior pronephros	0.4423	0.1031	0.3392	0.03057	27	18	15.69	352
12:WT posterior pronephros vs. 24:ndrg1a -/- anterior pronephros	0.4423	0.3617	0.08064	0.03057	27	18	3.731	352
12:Group B vs. 12:WT anterior pronephros	0.728	0.174	0.5539	0.02923	21	27	26.8	352
12:Group B vs. 12:ndrg1a -/- anterior pronephros	0.728	0.3987	0.3293	0.031	21	21	15.02	352
12:Group B vs. 18:WT posterior pronephros	0.728	0.431	0.2969	0.02923	21	27	14.37	352
12:Group B vs. 18:Group B	0.728	0.7133	0.01467	0.03396	21	15	0.6109	352
12:Group B vs. 18:WT anterior pronephros	0.728	0.1403	0.5876	0.02923	21	27	28.43	352
12:Group B vs. 18:ndrg1a -/- anterior pronephros	0.728	0.4342	0.2938	0.03396	21	15	12.23	352
12:Group B vs. 24:WT posterior pronephros	0.728	0.3178	0.4102	0.03227	21	18	17.98	352
12:Group B vs. 24:Group B	0.728	0.7961	-0.06813	0.03227	21	18	2.986	352
12:Group B vs. 24:WT anterior pronephros	0.728	0.1031	0.6249	0.03227	21	18	27.39	352
12:Group B vs. 24:ndrg1a -/- anterior pronephros	0.728	0.3617	0.3663	0.03227	21	18	16.05	352
12:WT anterior pronephros vs. 12:ndrg1a -/- anterior pronephros	0.174	0.3987	-0.2247	0.02923	27	21	10.87	352
12:WT anterior pronephros vs. 18:WT posterior pronephros	0.174	0.431	-0.257	0.02734	27	27	13.29	352
12:WT anterior pronephros vs. 18:Group B	0.174	0.7133	-0.5393	0.03235	27	15	23.57	352
12:WT anterior pronephros vs. 18:WT anterior pronephros	0.174	0.1403	0.03367	0.02734	27	27	1.741	352
12:WT anterior pronephros vs. 18:ndrg1a -/- anterior pronephros	0.174	0.4342	-0.2602	0.03235	27	15	11.37	352
12:WT anterior pronephros vs. 24:WT posterior pronephros	0.174	0.3178	-0.1438	0.03057	27	18	6.65	352
12:WT anterior pronephros vs. 24:Group B	0.174	0.7961	-0.6221	0.03057	27	18	28.78	352
12:WT anterior pronephros vs. 24:WT anterior pronephros	0.174	0.1031	0.07096	0.03057	27	18	3.283	352
12:WT anterior pronephros vs. 24:ndrg1a -/- anterior pronephros	0.174	0.3617	-0.1876	0.03057	27	18	8.681	352
12:ndrg1a -/- anterior pronephros vs. 18:WT posterior pronephros	0.3987	0.431	-0.03233	0.02923	21	27	1.564	352
12:ndrg1a -/- anterior pronephros vs. 18:Group B	0.3987	0.7133	-0.3146	0.03396	21	15	13.1	352
12:ndrg1a -/- anterior pronephros vs. 18:WT anterior pronephros	0.3987	0.1403	0.2584	0.02923	21	27	12.5	352
12:ndrg1a -/- anterior pronephros vs. 18:ndrg1a -/- anterior pronephros	0.3987	0.4342	-0.03548	0.03396	21	15	1.477	352
12:ndrg1a -/- anterior pronephros vs. 24:WT posterior pronephros	0.3987	0.3178	0.08094	0.03227	21	18	3.547	352
12:ndrg1a -/- anterior pronephros vs. 24:Group B	0.3987	0.7961	-0.3974	0.03227	21	18	17.42	352
12:ndrg1a -/- anterior pronephros vs. 24:WT anterior pronephros	0.3987	0.1031	0.2957	0.03227	21	18	12.96	352
12:ndrg1a -/- anterior pronephros vs. 24:ndrg1a -/- anterior pronephros	0.3987	0.3617	0.03705	0.03227	21	18	1.624	352
18:WT posterior pronephros vs. 18:Group B	0.431	0.7133	-0.2823	0.03235	27	15	12.34	352
18:WT posterior pronephros vs. 18:WT anterior pronephros	0.431	0.1403	0.2907	0.02734	27	27	15.04	352
18:WT posterior pronephros vs. 18:ndrg1a -/- anterior pronephros	0.431	0.4342	-0.003151	0.03235	27	15	0.1377	352
18:WT posterior pronephros vs. 24:WT posterior pronephros	0.431	0.3178	0.1133	0.03057	27	18	5.24	352
18:WT posterior pronephros vs. 24:Group B	0.431	0.7961	-0.365	0.03057	27	18	16.89	352
18:WT posterior pronephros vs. 24:WT anterior pronephros	0.431	0.1031	0.328	0.03057	27	18	15.17	352
18:WT posterior pronephros vs. 24:ndrg1a -/- anterior pronephros	0.431	0.3617	0.06938	0.03057	27	18	3.21	352
18:Group B vs. 18:WT anterior pronephros	0.7133	0.1403	0.5729	0.03235	15	27	25.05	352
18:Group B vs. 18:ndrg1a -/- anterior pronephros	0.7133	0.4342	0.2791	0.03668	15	15	10.76	352
18:Group B vs. 24:WT posterior pronephros	0.7133	0.3178	0.3955	0.03512	15	18	15.93	352
18:Group B vs. 24:Group B	0.7133	0.7961	-0.0828	0.03512	15	18	3.334	352
18:Group B vs. 24:WT anterior pronephros	0.7133	0.1031	0.6102	0.03512	15	18	24.57	352
18:Group B vs. 24:ndrg1a -/- anterior pronephros	0.7133	0.3617	0.3516	0.03512	15	18	14.16	352
18:WT anterior pronephros vs. 18:ndrg1a -/- anterior pronephros	0.1403	0.4342	-0.2938	0.03235	27	15	12.84	352
18:WT anterior pronephros vs. 24:WT posterior pronephros	0.1403	0.3178	-0.1774	0.03057	27	18	8.208	352
18:WT anterior pronephros vs. 24:Group B	0.1403	0.7961	-0.6557	0.03057	27	18	30.34	352
18:WT anterior pronephros vs. 24:WT anterior pronephros	0.1403	0.1031	0.03729	0.03057	27	18	1.725	352
18:WT anterior pronephros vs. 24:ndrg1a -/- anterior pronephros	0.1403	0.3617	-0.2213	0.03057	27	18	10.24	352
18:ndrg1a -/- anterior pronephros vs. 24:WT posterior pronephros	0.4342	0.3178	0.1164	0.03512	15	18	4.688	352
18:ndrg1a -/- anterior pronephros vs. 24:Group B	0.4342	0.7961	-0.3619	0.03512	15	18	14.57	352
18:ndrg1a -/- anterior pronephros vs. 24:WT anterior pronephros	0.4342	0.1031	0.3311	0.03512	15	18	13.33	352
18:ndrg1a -/- anterior pronephros vs. 24:ndrg1a -/- anterior pronephros	0.4342	0.3617	0.07253	0.03512	15	18	2.92	352
24:WT posterior pronephros vs. 24:Group B	0.3178	0.7961	-0.4783	0.03349	18	18	20.2	352
24:WT posterior pronephros vs. 24:WT anterior pronephros	0.3178	0.1031	0.2147	0.03349	18	18	9.067	352
24:WT posterior pronephros vs. 24:ndrg1a -/- anterior pronephros	0.3178	0.3617	-0.04389	0.03349	18	18	1.854	352
24:Group B vs. 24:WT anterior pronephros	0.7961	0.1031	0.693	0.03349	18	18	29.27	352
24:Group B vs. 24:ndrg1a -/- anterior pronephros	0.7961	0.3617	0.4344	0.03349	18	18	18.35	352
24:WT anterior pronephros vs. 24:ndrg1a -/- anterior pronephros	0.1031	0.3617	-0.2586	0.03349	18	18	10.92	352
