# Supplementary material for: N-myc downstream regulated gene 1 (ndrg1) functions as a molecular switch for cellular adaptation to hypoxia
Source: eLife journal article supplement (doi:10.7554/elife.74031), 2022-09-16
Supplement: fig7-data3 [file Figure 7-Source Data 3.xlsx]

## Sheet: Source Data
	Hours in anoxia	WT posterior pronephros
0		0.280203	0.278386	0.347139		0.388019	0.441755	0.436989		0.508336	0.592124	0.566636		0.373742	0.408652	0.410626				0.373981	0.466839	0.419325
6		0.53577	0.528082	0.50786		0.817071	0.950508	0.895566		0.692176	0.761577	0.705707								0.378376	0.373157	0.439809
12		0.8508	0.832699	0.821129		0.746369	0.876875	0.87624		0.850675	0.835443	0.824136		0.488893	0.525406	0.683278				0.751913	0.673396	0.623666	0.670539	0.68612	0.68571	0.470169	0.547147	0.551913
18		0.761399	0.811866	0.830256		0.600104	0.680142	0.652379		0.790343	0.755721	0.636503		0.716004	0.818658	0.865811				0.906569	0.792767	0.829409	0.754829	0.727097	0.769644
24		0.991984	0.92513	1		0.762908	0.751645	0.741091		0.58454	0.635947	0.64374								1	0.977755	0.99407	0.922435	0.872764	0.906559

## Sheet: ANOVA results
Table Analyzed	REVISION ALL Both WT pronephros intensity analysis
Two-way ANOVA	Ordinary
Alpha	0.05
Source of Variation	% of total variation	P value	P value summary	Significant?
Interaction	1.123	0.2511	ns	No
Row Factor	29.48	<0.0001	****	Yes
Column Factor	35.75	<0.0001	****	Yes
ANOVA table	SS (Type III)	DF	MS	F (DFn, DFd)	P value
Interaction	0.08717	4	0.02179	F (4, 152) = 1.358	P=0.2511
Row Factor	2.289	4	0.5722	F (4, 152) = 35.66	P<0.0001
Column Factor	2.776	1	2.776	F (1, 152) = 173.0	P<0.0001
Residual	2.439	152	0.01604
Difference between column means
Predicted (LS) mean of WT posterior pronephros	0.6737
Predicted (LS) mean of WT anterior pronephros	0.4072
Difference between predicted means	0.2665
SE of difference	0.02026
95% CI of difference	0.2265 to 0.3065
Data summary
Number of columns (Column Factor)	2
Number of rows (Row Factor)	5
Number of values	162

## Sheet: Multiple comparisons
Compare cell means regardless of rows and columns
Number of families	1
Number of comparisons per family	45
Alpha	0.05
Tukey's multiple comparisons test	Predicted (LS) mean diff.	95.00% CI of diff.	Below threshold?	Summary	Adjusted P Value
0:WT posterior pronephros vs. 0:WT anterior pronephros	0.1812	0.03270 to 0.3298	Yes	**	0.0051
0:WT posterior pronephros vs. 6:WT posterior pronephros	-0.2126	-0.3702 to -0.05508	Yes	**	0.0011
0:WT posterior pronephros vs. 6:WT anterior pronephros	0.04363	-0.1139 to 0.2012	No	ns	0.9966
0:WT posterior pronephros vs. 12:WT posterior pronephros	-0.2887	-0.4262 to -0.1512	Yes	****	<0.0001
0:WT posterior pronephros vs. 12:WT anterior pronephros	0.01308	-0.1244 to 0.1506	No	ns	>0.9999
0:WT posterior pronephros vs. 18:WT posterior pronephros	-0.3416	-0.4838 to -0.1994	Yes	****	<0.0001
0:WT posterior pronephros vs. 18:WT anterior pronephros	-0.06434	-0.2065 to 0.07787	No	ns	0.908
0:WT posterior pronephros vs. 24:WT posterior pronephros	-0.4279	-0.5764 to -0.2793	Yes	****	<0.0001
0:WT posterior pronephros vs. 24:WT anterior pronephros	-0.1119	-0.2604 to 0.03667	No	ns	0.3224
0:WT anterior pronephros vs. 6:WT posterior pronephros	-0.3938	-0.5514 to -0.2363	Yes	****	<0.0001
0:WT anterior pronephros vs. 6:WT anterior pronephros	-0.1376	-0.2951 to 0.01994	No	ns	0.1443
0:WT anterior pronephros vs. 12:WT posterior pronephros	-0.4699	-0.6074 to -0.3324	Yes	****	<0.0001
0:WT anterior pronephros vs. 12:WT anterior pronephros	-0.1681	-0.3057 to -0.03064	Yes	**	0.005
0:WT anterior pronephros vs. 18:WT posterior pronephros	-0.5228	-0.6650 to -0.3806	Yes	****	<0.0001
0:WT anterior pronephros vs. 18:WT anterior pronephros	-0.2456	-0.3878 to -0.1034	Yes	****	<0.0001
0:WT anterior pronephros vs. 24:WT posterior pronephros	-0.6091	-0.7576 to -0.4606	Yes	****	<0.0001
0:WT anterior pronephros vs. 24:WT anterior pronephros	-0.2931	-0.4416 to -0.1446	Yes	****	<0.0001
6:WT posterior pronephros vs. 6:WT anterior pronephros	0.2563	0.09019 to 0.4223	Yes	****	<0.0001
6:WT posterior pronephros vs. 12:WT posterior pronephros	-0.07608	-0.2233 to 0.07112	No	ns	0.8159
6:WT posterior pronephros vs. 12:WT anterior pronephros	0.2257	0.07850 to 0.3729	Yes	****	<0.0001
6:WT posterior pronephros vs. 18:WT posterior pronephros	-0.1289	-0.2805 to 0.02265	No	ns	0.1707
6:WT posterior pronephros vs. 18:WT anterior pronephros	0.1483	-0.003310 to 0.2999	No	ns	0.0609
6:WT posterior pronephros vs. 24:WT posterior pronephros	-0.2152	-0.3728 to -0.05769	Yes	***	0.0009
6:WT posterior pronephros vs. 24:WT anterior pronephros	0.1008	-0.05678 to 0.2583	No	ns	0.5628
6:WT anterior pronephros vs. 12:WT posterior pronephros	-0.3323	-0.4795 to -0.1851	Yes	****	<0.0001
6:WT anterior pronephros vs. 12:WT anterior pronephros	-0.03055	-0.1778 to 0.1166	No	ns	0.9997
6:WT anterior pronephros vs. 18:WT posterior pronephros	-0.3852	-0.5368 to -0.2336	Yes	****	<0.0001
6:WT anterior pronephros vs. 18:WT anterior pronephros	-0.108	-0.2596 to 0.04363	No	ns	0.4035
6:WT anterior pronephros vs. 24:WT posterior pronephros	-0.4715	-0.6290 to -0.3139	Yes	****	<0.0001
6:WT anterior pronephros vs. 24:WT anterior pronephros	-0.1555	-0.3130 to 0.002046	No	ns	0.0563
12:WT posterior pronephros vs. 12:WT anterior pronephros	0.3018	0.1762 to 0.4273	Yes	****	<0.0001
12:WT posterior pronephros vs. 18:WT posterior pronephros	-0.05287	-0.1835 to 0.07779	No	ns	0.9524
12:WT posterior pronephros vs. 18:WT anterior pronephros	0.2244	0.09370 to 0.3550	Yes	****	<0.0001
12:WT posterior pronephros vs. 24:WT posterior pronephros	-0.1392	-0.2767 to -0.001643	Yes	*	0.0448
12:WT posterior pronephros vs. 24:WT anterior pronephros	0.1768	0.03932 to 0.3143	Yes	**	0.0024
12:WT anterior pronephros vs. 18:WT posterior pronephros	-0.3546	-0.4853 to -0.2240	Yes	****	<0.0001
12:WT anterior pronephros vs. 18:WT anterior pronephros	-0.07742	-0.2081 to 0.05324	No	ns	0.6672
12:WT anterior pronephros vs. 24:WT posterior pronephros	-0.4409	-0.5784 to -0.3034	Yes	****	<0.0001
12:WT anterior pronephros vs. 24:WT anterior pronephros	-0.1249	-0.2625 to 0.01257	No	ns	0.1097
18:WT posterior pronephros vs. 18:WT anterior pronephros	0.2772	0.1416 to 0.4128	Yes	****	<0.0001
18:WT posterior pronephros vs. 24:WT posterior pronephros	-0.08629	-0.2285 to 0.05592	No	ns	0.636
18:WT posterior pronephros vs. 24:WT anterior pronephros	0.2297	0.08749 to 0.3719	Yes	****	<0.0001
18:WT anterior pronephros vs. 24:WT posterior pronephros	-0.3635	-0.5057 to -0.2213	Yes	****	<0.0001
18:WT anterior pronephros vs. 24:WT anterior pronephros	-0.04753	-0.1897 to 0.09468	No	ns	0.9866
24:WT posterior pronephros vs. 24:WT anterior pronephros	0.316	0.1675 to 0.4645	Yes	****	<0.0001
Test details	Predicted (LS) mean 1	Predicted (LS) mean 2	Predicted (LS) mean diff.	SE of diff.	N1	N2	q	DF
0:WT posterior pronephros vs. 0:WT anterior pronephros	0.4195	0.2383	0.1812	0.04625	15	15	5.541	152
0:WT posterior pronephros vs. 6:WT posterior pronephros	0.4195	0.6321	-0.2126	0.04906	15	12	6.129	152
0:WT posterior pronephros vs. 6:WT anterior pronephros	0.4195	0.3759	0.04363	0.04906	15	12	1.258	152
0:WT posterior pronephros vs. 12:WT posterior pronephros	0.4195	0.7082	-0.2887	0.04282	15	21	9.534	152
0:WT posterior pronephros vs. 12:WT anterior pronephros	0.4195	0.4064	0.01308	0.04282	15	21	0.4319	152
0:WT posterior pronephros vs. 18:WT posterior pronephros	0.4195	0.7611	-0.3416	0.04428	15	18	10.91	152
0:WT posterior pronephros vs. 18:WT anterior pronephros	0.4195	0.4839	-0.06434	0.04428	15	18	2.055	152
0:WT posterior pronephros vs. 24:WT posterior pronephros	0.4195	0.8474	-0.4279	0.04625	15	15	13.08	152
0:WT posterior pronephros vs. 24:WT anterior pronephros	0.4195	0.5314	-0.1119	0.04625	15	15	3.42	152
0:WT anterior pronephros vs. 6:WT posterior pronephros	0.2383	0.6321	-0.3938	0.04906	15	12	11.35	152
0:WT anterior pronephros vs. 6:WT anterior pronephros	0.2383	0.3759	-0.1376	0.04906	15	12	3.967	152
0:WT anterior pronephros vs. 12:WT posterior pronephros	0.2383	0.7082	-0.4699	0.04282	15	21	15.52	152
0:WT anterior pronephros vs. 12:WT anterior pronephros	0.2383	0.4064	-0.1681	0.04282	15	21	5.553	152
0:WT anterior pronephros vs. 18:WT posterior pronephros	0.2383	0.7611	-0.5228	0.04428	15	18	16.7	152
0:WT anterior pronephros vs. 18:WT anterior pronephros	0.2383	0.4839	-0.2456	0.04428	15	18	7.842	152
0:WT anterior pronephros vs. 24:WT posterior pronephros	0.2383	0.8474	-0.6091	0.04625	15	15	18.62	152
0:WT anterior pronephros vs. 24:WT anterior pronephros	0.2383	0.5314	-0.2931	0.04625	15	15	8.961	152
6:WT posterior pronephros vs. 6:WT anterior pronephros	0.6321	0.3759	0.2563	0.05171	12	12	7.008	152
6:WT posterior pronephros vs. 12:WT posterior pronephros	0.6321	0.7082	-0.07608	0.04584	12	21	2.347	152
6:WT posterior pronephros vs. 12:WT anterior pronephros	0.6321	0.4064	0.2257	0.04584	12	21	6.963	152
6:WT posterior pronephros vs. 18:WT posterior pronephros	0.6321	0.7611	-0.1289	0.04721	12	18	3.863	152
6:WT posterior pronephros vs. 18:WT anterior pronephros	0.6321	0.4839	0.1483	0.04721	12	18	4.442	152
6:WT posterior pronephros vs. 24:WT posterior pronephros	0.6321	0.8474	-0.2152	0.04906	12	15	6.205	152
6:WT posterior pronephros vs. 24:WT anterior pronephros	0.6321	0.5314	0.1008	0.04906	12	15	2.905	152
6:WT anterior pronephros vs. 12:WT posterior pronephros	0.3759	0.7082	-0.3323	0.04584	12	21	10.25	152
6:WT anterior pronephros vs. 12:WT anterior pronephros	0.3759	0.4064	-0.03055	0.04584	12	21	0.9426	152
6:WT anterior pronephros vs. 18:WT posterior pronephros	0.3759	0.7611	-0.3852	0.04721	12	18	11.54	152
6:WT anterior pronephros vs. 18:WT anterior pronephros	0.3759	0.4839	-0.108	0.04721	12	18	3.234	152
6:WT anterior pronephros vs. 24:WT posterior pronephros	0.3759	0.8474	-0.4715	0.04906	12	15	13.59	152
6:WT anterior pronephros vs. 24:WT anterior pronephros	0.3759	0.5314	-0.1555	0.04906	12	15	4.482	152
12:WT posterior pronephros vs. 12:WT anterior pronephros	0.7082	0.4064	0.3018	0.03909	21	21	10.92	152
12:WT posterior pronephros vs. 18:WT posterior pronephros	0.7082	0.7611	-0.05287	0.04069	21	18	1.838	152
12:WT posterior pronephros vs. 18:WT anterior pronephros	0.7082	0.4839	0.2244	0.04069	21	18	7.798	152
12:WT posterior pronephros vs. 24:WT posterior pronephros	0.7082	0.8474	-0.1392	0.04282	21	15	4.596	152
12:WT posterior pronephros vs. 24:WT anterior pronephros	0.7082	0.5314	0.1768	0.04282	21	15	5.84	152
12:WT anterior pronephros vs. 18:WT posterior pronephros	0.4064	0.7611	-0.3546	0.04069	21	18	12.33	152
12:WT anterior pronephros vs. 18:WT anterior pronephros	0.4064	0.4839	-0.07742	0.04069	21	18	2.691	152
12:WT anterior pronephros vs. 24:WT posterior pronephros	0.4064	0.8474	-0.4409	0.04282	21	15	14.56	152
12:WT anterior pronephros vs. 24:WT anterior pronephros	0.4064	0.5314	-0.1249	0.04282	21	15	4.126	152
18:WT posterior pronephros vs. 18:WT anterior pronephros	0.7611	0.4839	0.2772	0.04222	18	18	9.286	152
18:WT posterior pronephros vs. 24:WT posterior pronephros	0.7611	0.8474	-0.08629	0.04428	18	15	2.756	152
18:WT posterior pronephros vs. 24:WT anterior pronephros	0.7611	0.5314	0.2297	0.04428	18	15	7.336	152
18:WT anterior pronephros vs. 24:WT posterior pronephros	0.4839	0.8474	-0.3635	0.04428	18	15	11.61	152
18:WT anterior pronephros vs. 24:WT anterior pronephros	0.4839	0.5314	-0.04753	0.04428	18	15	1.518	152
24:WT posterior pronephros vs. 24:WT anterior pronephros	0.8474	0.5314	0.316	0.04625	15	15	9.662	152
